# Supplementary material for: Sunitinib-suppressed miR-452-5p facilitates renal cancer cell invasion and metastasis through modulating SMAD4/SMAD7 signals
Source: Mol Cancer. 2018 Nov 12;17:157. doi: 10.1186/s12943-018-0906-x (PMC6231268; doi:10.1186/s12943-018-0906-x)
Supplement: Supplementary file 1 — Table S1. Sequences of oligonucleotides used in this study. (XLSX 10 kb) [file 12943_2018_906_MOESM1_ESM.xlsx]

## Sheet: Sheet1
	Table S1. Sequences of oligonucleotides used in this study
	Assay		Sequences
	Transient Transfection	miR-452-5p	5'-AACUGUUUGCAGAGGAAACUGA-3'
			5'-AGUUUCCUCUGCAAACAGUUUU-3'
		miR-NC	5'-UUCUCCGAACGUGUCACGUTT-3'
			5'-ACGUGACACGUUCGGAGAATT-3'
		anti-miR-452-5p	5'-UCAGUUUCCUCUGCAAACAGUU-3'
		anti-miR-NC	5'-CAGUACUUUUGUGUAGUACAA-3'
		LNA-miR-452-5p	5'-UCAGUUUCCUCUGCAAACAGUU-3'
		LNA-miR-NC	5'-UCUACUCUUUCUAGGAGGUUGUGA-3'
	Primer for qRT-PCR	miR-452-5p Forward	5'-AGCGCGAACTGTTTGCAGAGGA-3'
		miR-452-5p Reverse	5'-ATCCAGTGCAGGGTCCGAGG-3'
		miR-452-5p RT primer	5'-GTCGTATCCAGTGCAGGGTCCGAGGTATTCGCACTGGATACGACTCAGTT-3'
		U6 Forward	5'-CTCGCTTCGGCAGCACA-3'
		U6 Reverse	5'-AACGCTTCACGAATTTGCGT-3'
		U6 RT primer	5'-AACGCTTCACGAATTTGCGT-3'
	Primer for ChIP-qRT-PCR	miR-452-5p Forward1	5'-TTACCGTTCCTACTCTTTTTCTTCC-3'
		miR-452-5p Reverse1	5'-GGACCCACTGTCTCACTCTGAGACA-3'
		miR-452-5p Forward2	5'-TCGTGTGGGACGATTAAAAACGTAA-3'
		miR-452-5p Reverse2	5'-GAGAGAACAATAGAGAGGA-3'
		miR-452-5p Forward3	5'-CCGGGAATCTCCATAGTAAGTCCTA-3'
		miR-452-5p Reverse3	5'-GACCATGCTGCTTGCGGAGACAATG-3'
	Vector Construction	miR-NC	5'-UUCUCCGAACGUGUCACGUTT-3'
			5'-ACGUGACACGUUCGGAGAATT-3'
		sh-miR-452-5p Forward	5'-GATCCGAACTGTTCGCAGAGGAACCTAACTTCCTGTCAGATCAGTTTCCTCTGCAAACAGTTTTTTTG-3'
		sh-miR-452-5p Reverse	5'-AATTCAAAAAAACTGTTTGCAGAGGAAACTGATCTGACAGGAAGTTAGGTTCCTCTGCGAACAGTTCG-3'
