# Supplementary material for: Sunitinib-suppressed miR-452-5p facilitates renal cancer cell invasion and metastasis through modulating SMAD4/SMAD7 signals
Source: Mol Cancer. 2018 Nov 12;17:157. doi: 10.1186/s12943-018-0906-x (PMC6231268; doi:10.1186/s12943-018-0906-x)
Supplement: Supplementary file 2 — Table S2-GSE32099. (XLS 113 kb) [file 12943_2018_906_MOESM2_ESM.xls]

## Sheet: Sheet1
miRNA_ID	P.Value	logFC
hsa-miR-93*	0.02126	3.24164
hsa-miR-628-3p	0.01998	3.24085
hsa-miR-183*	0.01422	2.99264
hsa-miR-454*	0.00527	2.72533
hsa-miR-15b*	0.03279	2.7016
hsa-miR-181a-2*	0.03877	2.62342
hsa-miR-548d-5p	0.00133	2.58532
hsa-miR-545	0.03308	2.56433
hsa-miR-873	0.04853	2.5228
ebv-miR-BART16	0.04243	2.20254
hsa-miR-424*	0.01053	2.06555
hsa-miR-664*	0.0134	1.84558
hsa-miR-501-3p	0.02922	1.8358
hsa-miR-338-5p	0.03419	1.82819
hsa-miR-1308	0.04577	1.57812
hsa-miR-99a	0.00272	1.54658
hsa-miR-10a	0.00395	1.53544
hsa-miR-32*	0.01746	1.48365
hsa-miR-370	0.01777	1.41279
hsa-miR-101*	0.04624	1.26949
hsa-miR-195	0.04848	0.672385
hsa-miR-342-3p	0.04033	0.53855
SCorner3	0.03508	0.44278
hsa-miR-595	0.0466	-0.407482
hsa-miR-525-5p	0.04367	-0.408748
hsa-miR-1297	0.04559	-0.412509
hsa-miR-632	0.04173	-0.413241
hsa-miR-206	0.04279	-0.415617
hsa-miR-640	0.04267	-0.416777
hsa-miR-485-5p	0.04287	-0.416854
hsa-miR-136*	0.04305	-0.41757
hsa-miR-212	0.03877	-0.417682
hsa-miR-323-3p	0.04072	-0.421946
hsa-miR-1270	0.04099	-0.422731
hsa-miR-376b	0.03866	-0.424698
bkv-miR-B1-3p	0.04061	-0.426624
hsa-miR-31*	0.03886	-0.42743
hsa-miR-299-3p	0.03881	-0.428645
hsa-miR-433	0.03849	-0.428806
hsa-miR-373	0.03977	-0.429365
hsa-miR-329	0.03919	-0.429394
hsa-miR-520h	0.04181	-0.429563
hsa-miR-585	0.03881	-0.429777
hsa-miR-516a-3p	0.03862	-0.429793
hsa-miR-1253	0.03759	-0.430056
hsa-miR-520g	0.03899	-0.430115
hsa-miR-122*	0.04029	-0.430174
hiv1-miR-TAR-3p	0.03825	-0.430267
hsa-miR-302d	0.03869	-0.430394
hsa-miR-154*	0.03925	-0.430447
hsa-miR-369-5p	0.03793	-0.430962
hsa-miR-490-3p	0.03692	-0.43198
hsa-miR-411	0.03641	-0.432217
hsa-miR-1258	0.03842	-0.432428
hsa-miR-520f	0.04095	-0.432464
hsa-miR-337-3p	0.03776	-0.432756
hsa-miR-519e*	0.03479	-0.433081
hsa-miR-10b	0.03947	-0.433226
hsa-miR-1301	0.03696	-0.433727
hsa-miR-656	0.03924	-0.433814
hsa-miR-1247	0.039	-0.434029
hsa-miR-1201	0.03857	-0.434337
hsa-miR-205	0.03942	-0.434689
hsa-miR-153	0.0382	-0.434789
hsa-miR-487a	0.03783	-0.434823
hsa-miR-302a	0.03963	-0.435117
hsa-miR-571	0.03685	-0.435332
hsa-miR-1304	0.03785	-0.435473
hsa-miR-510	0.03638	-0.435794
hsa-miR-202*	0.03922	-0.435866
hsv1-miR-H3_v14.0	0.0375	-0.436014
hsa-miR-499-5p	0.03739	-0.436137
hiv1-miR-TAR-5p	0.03758	-0.436205
hsa-miR-548e	0.03793	-0.436245
dmr_316	0.03779	-0.436246
hsa-miR-548f	0.03715	-0.436254
hsa-miR-1322	0.0373	-0.43629
hsa-miR-1537	0.03754	-0.436291
hsa-miR-1286	0.03747	-0.436339
hsa-miR-548g	0.03816	-0.43639
hsa-miR-211	0.0381	-0.436438
hsa-miR-1303	0.03568	-0.436474
dmr_6	0.03776	-0.436525
hsa-miR-1296	0.03898	-0.436543
hsa-miR-518a-5p	0.03279	-0.436618
hsa-miR-34b	0.03783	-0.436639
hsa-miR-548n	0.03798	-0.436689
hsa-miR-518f	0.03763	-0.436829
hsa-miR-548o	0.03779	-0.43702
hsa-miR-1292	0.03703	-0.437075
hsa-miR-373*	0.03505	-0.43719
hsa-miR-663b	0.03688	-0.437217
hsa-miR-30a*	0.03683	-0.437393
hsa-miR-1914	0.03728	-0.437486
hsa-miR-518b	0.03781	-0.437519
hsa-miR-1203	0.03621	-0.437533
hsa-miR-1266	0.03686	-0.437535
hsa-miR-452	0.03605	-0.437661
hsv1-miR-H4*	0.03724	-0.437839
hsa-miR-519d	0.03791	-0.437881
hsa-miR-135b	0.03714	-0.437885
hsa-miR-1269	0.03707	-0.437894
hsa-miR-1265	0.03779	-0.437917
hsa-miR-517*	0.03717	-0.437927
hsa-miR-508-3p	0.03692	-0.438076
hsa-miR-1185	0.03725	-0.438102
hsa-miR-1911	0.03712	-0.438182
hsa-miR-520c-3p	0.03689	-0.438231
hsa-miR-518a-3p	0.03783	-0.43825
hsa-miR-9	0.03685	-0.438372
hsa-miR-1279	0.03729	-0.438376
hsa-miR-520d-3p	0.03576	-0.438473
hsa-miR-214*	0.03689	-0.438528
hsa-miR-524-3p	0.03764	-0.438533
hsa-miR-518c	0.03743	-0.438607
hsv1-miR-H4	0.03733	-0.43871
hsa-miR-214	0.03643	-0.438716
hsa-miR-517b	0.03738	-0.43876
hsa-miR-568	0.03708	-0.438835
NC2_00106057	0.03771	-0.438866
hsa-miR-885-5p	0.03675	-0.438899
hsa-miR-1179	0.03698	-0.438903
hsa-miR-517a	0.03718	-0.438978
hsa-miR-605	0.03695	-0.439008
hsa-miR-489	0.03641	-0.439112
hsa-miR-372	0.03707	-0.439218
hsa-miR-1324	0.0372	-0.439228
hsa-miR-548k	0.03836	-0.439258
hsa-miR-1197	0.03661	-0.439269
hsa-miR-519b-3p	0.03754	-0.439316
dmr_308	0.03688	-0.439357
hsa-miR-200a	0.03641	-0.439383
hsa-miR-137	0.03707	-0.439407
hsa-miR-1248	0.03676	-0.439423
hsa-miR-488	0.03615	-0.439483
hsa-miR-518e	0.03616	-0.439523
hsv1-miR-H5-3p	0.03674	-0.439539
hsa-miR-1245	0.03653	-0.439545
NC2_00122731	0.03706	-0.439556
hsa-miR-519e	0.03709	-0.439558
hsa-miR-506	0.03642	-0.439576
hsa-miR-1538	0.03665	-0.439585
hsa-miR-1293	0.03682	-0.439632
hsa-miR-1287	0.03664	-0.439678
hsa-miR-592	0.03645	-0.439701
NC2_00079215	0.03687	-0.439748
hsa-miR-1252	0.03675	-0.439775
hsa-miR-384	0.03657	-0.439797
hsa-miR-375	0.0366	-0.439823
hsa-miR-1302	0.03663	-0.439823
hsa-miR-1298	0.03696	-0.439876
hsa-miR-1243	0.03622	-0.43991
hsa-miR-523	0.03652	-0.439921
hsa-miR-208b	0.0365	-0.439953
hsa-miR-1277	0.03666	-0.439957
hsa-miR-496	0.03673	-0.439963
hsa-miR-1273	0.03669	-0.439985
hsa-miR-518f*	0.03714	-0.439987
hsa-miR-675*	0.03614	-0.439996
hsa-miR-1263	0.03648	-0.440007
hsa-miR-509-5p	0.03596	-0.440018
hsa-miR-369-3p	0.03675	-0.440044
hsa-miR-1908	0.03651	-0.440086
hsa-miR-1272	0.03688	-0.440141
hsa-miR-208a	0.03653	-0.44016
dmr_3	0.0365	-0.440188
NC2_00092197	0.03709	-0.440287
hsa-miR-520a-3p	0.03642	-0.440291
hsa-miR-219-2-3p	0.03439	-0.44032
hsa-miR-429	0.03665	-0.440379
hsa-miR-891a	0.03644	-0.440402
hsa-miR-518d-3p	0.03649	-0.44041
hsa-miR-520a-5p	0.03568	-0.440473
hsa-miR-367	0.03721	-0.440479
hsa-miR-577	0.03689	-0.440513
hsa-miR-147	0.03648	-0.440568
hsa-miR-1910	0.03655	-0.440713
hsa-miR-1207-3p	0.03659	-0.440736
NegativeControl	0.03649	-0.440742
hsa-miR-548l	0.03609	-0.440768
hsa-miR-455-3p	0.03653	-0.440833
hsa-miR-517c	0.03703	-0.44089
hsa-miR-203	0.03587	-0.440928
hsa-miR-1184	0.0364	-0.440939
hsa-miR-492	0.03404	-0.440942
hsa-miR-204	0.03585	-0.440952
hsv1-miR-H2	0.03635	-0.440967
DarkCorner	0.03575	-0.440994
hsa-miR-488*	0.0368	-0.441054
hsa-miR-1912	0.03645	-0.441068
hsa-miR-507	0.03681	-0.441071
hsa-miR-608	0.03588	-0.441214
hsa-miR-143*	0.03609	-0.441216
hsa-miR-383	0.03445	-0.441481
hsa-miR-548p	0.03648	-0.441498
hsa-miR-888	0.03601	-0.441683
hsa-miR-891b	0.03561	-0.441805
hsa-miR-138	0.0347	-0.441951
hsa-miR-1257	0.03614	-0.441956
hsa-miR-620	0.03593	-0.442099
hsa-miR-526b*	0.03535	-0.442227
dmr_285	0.03562	-0.442234
hsa-miR-548m	0.03568	-0.442278
hsa-miR-455-5p	0.0357	-0.442328
hsa-miR-515-3p	0.03592	-0.442358
hsa-miR-1911*	0.03632	-0.442361
NC1_00000215	0.03601	-0.442396
hsa-miR-522	0.03609	-0.442433
hsa-miR-1264	0.03553	-0.442561
NC1_00000197	0.03624	-0.442652
hsa-miR-514	0.03507	-0.442675
hsa-miR-1913	0.03518	-0.442741
hsa-miR-1244	0.03539	-0.442778
hsa-miR-1200	0.03556	-0.442844
hsa-miR-519c-3p	0.03514	-0.442852
hsa-miR-1206	0.03574	-0.442937
hsa-miR-122	0.03576	-0.442973
hsa-miR-1915*	0.03462	-0.443023
hsa-miR-380	0.03577	-0.443242
hsa-miR-1294	0.03531	-0.443398
hsa-miR-135a	0.03602	-0.443759
hsa-miR-1204	0.03424	-0.443777
hsa-miR-521	0.03456	-0.443857
hsa-miR-1233	0.03407	-0.44392
hsa-miR-1278	0.03452	-0.444614
hsa-miR-1282	0.03495	-0.445101
hsa-miR-1205	0.03458	-0.445127
hsa-miR-509-3p	0.03507	-0.445164
hsa-miR-1251	0.03523	-0.445236
hsa-miR-611	0.03097	-0.445298
hsa-miR-1256	0.03507	-0.445307
hsa-miR-371-3p	0.0349	-0.445679
hsa-miR-1284	0.03518	-0.445838
hsa-miR-1178	0.03411	-0.445874
hsa-miR-1231	0.03544	-0.446206
hsa-miR-1289	0.03532	-0.446447
jcv-miR-J1-3p	0.03242	-0.446585
hsa-miR-515-5p	0.03412	-0.446658
hsa-miR-1468	0.03473	-0.448958
hsa-miR-548h	0.03249	-0.450477
hsa-miR-132*	0.03188	-0.450586
hsa-miR-302e	0.03206	-0.452136
hsa-miR-103-as	0.03193	-0.453708
hsa-miR-346	0.03104	-0.457121
hsa-miR-449b	0.02841	-0.458045
hcmv-miR-US25-2-3p	0.0321	-0.464517
hsa-miR-518c*	0.00883	-0.583548
dmr_31a	0.0214	-0.585308
hsa-miR-650	0.03016	-0.596417
hsa-miR-509-3-5p	0.00857	-0.620553
hsv1-miR-H2*	0.00935	-0.646161
hsa-miR-520b	0.01381	-0.667535
hsa-miR-580	0.03158	-0.671404
hsa-miR-1262	0.03545	-0.692367
hsa-miR-1283	0.04057	-0.705815
hsa-miR-1909	0.03845	-0.716872
hsa-miR-604	0.02382	-0.726679
hsa-miR-609	0.04579	-0.759799
hsa-miR-512-5p	0.03686	-0.802845
hsa-miR-613	0.03385	-0.839491
hsa-miR-720	0.04152	-0.849257
hsa-miR-520e	0.0435	-0.852568
kshv-miR-K12-6-3p	0.03775	-0.856026
hsa-miR-302b	0.03488	-0.864822
hsa-miR-432*	0.02646	-0.943798
hsa-miR-124*	0.01562	-0.973246
hsa-miR-619	0.01099	-1.40253
hsa-miR-1274a	0.03928	-1.43993
hsa-miR-26a-1*	0.0477	-1.70904
hsa-miR-642	0.04893	-1.7431
hsa-miR-671-3p	0.00745	-1.80409
hsa-miR-423-3p	0.05043	1.423
ebv-miR-BART12	0.0515	2.6397
hsa-miR-146a	0.05456	0.694448
hsa-miR-583	0.05576	-0.7869
hsa-miR-1255b	0.05881	-0.764486
hcmv-miR-UL70-5p	0.05885	-0.757834
hsa-miR-1259	0.05961	-0.531146
hsa-miR-342-5p	0.0619	0.54126
hsa-miR-29c*	0.06194	0.614817
hsa-miR-34a*	0.06208	-0.85115
hsa-miR-920	0.06408	0.584771
hsa-miR-361-3p	0.06682	0.563867
hsa-miR-199a-5p	0.06714	0.790424
ebv-miR-BART19-3p	0.0694	1.20989
hsa-miR-148b	0.06957	0.664451
hsa-miR-132	0.06969	0.972175
hsa-miR-194*	0.07133	2.31187
hsa-miR-937	0.07207	-0.901932
kshv-miR-K12-7_v14.0	0.07539	2.99818
hsa-miR-1274b	0.07762	-0.729937
hsa-miR-490-5p	0.07856	2.7834
hsa-miR-24-2*	0.07899	-1.3934
hcmv-miR-UL22A*	0.07921	-0.850692
hsa-miR-197	0.0811	-0.520169
hsa-miR-221	0.08123	0.60742
hsa-miR-574-5p	0.0815	0.611568
hsa-miR-622	0.08163	1.57079
hsa-miR-552	0.08167	-0.710134
hsa-miR-497*	0.08526	-0.621077
hsa-let-7b*	0.08573	-0.4264
hsa-miR-597	0.08617	-0.856393
hsa-miR-125b	0.08643	1.09464
hsa-miR-548d-3p	0.09	-1.19326
hsa-miR-500	0.09313	1.38783
hsa-miR-335	0.09326	0.880728
hsa-miR-193a-5p	0.09423	-0.6527
hsa-miR-181d	0.09761	0.63684
hsa-miR-19b-1*	0.10002	1.92488
hsa-miR-421	0.10165	0.619702
hcmv-miR-US4	0.1045	2.22246
hcmv-miR-UL36	0.10465	1.75696
hsa-miR-1238	0.10502	-0.328566
hsa-miR-708	0.10514	1.20146
hsa-miR-151-5p	0.10547	0.553052
hcmv-miR-UL112	0.10797	-0.666016
hsa-miR-34c-3p	0.11045	2.22853
hsa-miR-220c	0.11049	1.47346
hsa-miR-377	0.11113	0.979652
ebv-miR-BART1-3p	0.11291	1.22097
hsa-miR-146b-5p	0.11309	0.616552
hsa-miR-562	0.11352	-1.67779
hsa-miR-187	0.11458	-0.603152
hsa-miR-106b*	0.11566	-1.76667
hsa-miR-22*	0.11696	0.708966
hsa-miR-151-3p	0.11782	0.532066
hsa-miR-96	0.11892	0.615926
hsa-miR-7	0.11926	0.649955
hsa-miR-198	0.1198	0.874415
hsa-miR-1234	0.11997	-0.29372
hsa-miR-126*	0.12109	1.04029
hsa-miR-326	0.12171	0.545679
hsa-miR-32	0.12393	1.54967
hsa-miR-371-5p	0.12937	2.07584
hsa-miR-143	0.12975	0.796316
hsa-miR-497	0.13074	0.639637
hsa-miR-30a	0.13288	0.788525
hsa-miR-1225-3p	0.13301	-0.284051
hsa-miR-141*	0.13337	-0.52495
hsa-miR-26b	0.13578	0.495136
hsa-miR-33b	0.13614	0.498012
hsa-miR-7-2*	0.13616	0.970654
hsa-miR-7-1*	0.13708	0.806704
hsa-miR-130a	0.13741	0.482489
hsa-miR-29a*	0.13945	-0.540323
hsa-miR-590-5p	0.1406	0.390209
hsa-miR-653	0.14063	-0.654626
hsa-miR-561	0.14102	-1.09071
kshv-miR-K12-2	0.14232	0.479203
hsa-miR-380*	0.14243	-1.10286
hsa-miR-564	0.14256	1.29919
hsa-miR-107	0.14271	0.4368
hsa-miR-601	0.14318	1.84265
hsa-miR-101	0.144	0.578221
hsa-miR-148b*	0.1446	-1.18145
hiv1-miR-N367	0.14625	-0.521053
hsa-miR-136	0.14719	0.971783
ebv-miR-BART7*	0.14835	-1.69679
hsa-miR-410	0.15031	1.12324
hsa-miR-1260	0.15044	-0.787248
hur_5	0.15121	1.021
hsa-miR-1539	0.1526	-0.320165
hsa-miR-374b*	0.15334	-1.08301
hsa-miR-933	0.15367	-0.334034
hsa-miR-33b*	0.15503	-0.286631
hsa-miR-128	0.1562	0.464438
hsa-miR-637	0.15697	-0.39928
hsa-miR-20b*	0.15761	-0.454366
hsa-miR-298	0.15873	2.28061
ebv-miR-BART3	0.1591	-0.700623
hsa-miR-660	0.15935	0.496634
hsa-miR-376a	0.16125	0.971504
hsa-miR-504	0.16573	-0.510617
hsa-miR-657	0.1661	-0.506851
hsa-let-7g	0.16638	0.41822
hsa-miR-20a*	0.16656	0.752137
hsa-let-7g*	0.16677	0.418483
hsa-miR-192*	0.16738	0.469179
hsa-miR-144*	0.16828	0.662382
hsa-miR-215	0.16848	0.476677
hsa-miR-431*	0.16945	-1.20343
hsa-miR-27b	0.17015	0.407839
hsa-miR-222*	0.17125	-0.329062
hsa-miR-593	0.17187	-0.486529
hsa-miR-367*	0.17379	-1.29578
hsa-miR-191*	0.17507	-0.290308
hsa-miR-19a	0.17528	0.529329
hsa-miR-551b	0.17533	0.745474
hsa-miR-330-5p	0.17551	-0.535596
hsa-miR-486-3p	0.17724	-0.36918
hsa-miR-186	0.17747	0.442391
hsv1-miR-H6-3p	0.17944	-0.300273
hsa-miR-185	0.1838	0.472774
hsa-miR-643	0.18404	-0.498185
hsa-miR-31	0.18715	0.828125
hsa-miR-578	0.1872	-0.553615
hsa-miR-541	0.18806	-0.499784
hsa-miR-627	0.18915	0.832021
hsa-miR-378	0.18927	0.7388
hsa-miR-602	0.1898	-0.247793
hsa-miR-425	0.19037	0.288832
hsa-miR-581	0.19047	-0.890489
hsa-miR-551a	0.19094	-0.604071
hsa-miR-1246	0.19096	0.632679
hsa-miR-147b	0.19177	-0.465315
hsa-miR-296-3p	0.19462	-0.590848
hsa-miR-425*	0.19697	-0.286184
hsa-miR-200c	0.19705	0.521537
hsa-miR-98	0.19719	0.474932
hsa-miR-569	0.19867	-0.559324
hsa-miR-610	0.199	1.88233
hsa-let-7i	0.20022	0.390473
hsa-miR-376c	0.20084	0.973224
hsa-miR-150	0.20141	0.380048
hsa-miR-16-2*	0.20142	0.580183
hsa-let-7c	0.2028	0.449039
hsa-miR-339-3p	0.20342	1.65409
hsa-miR-23a*	0.20501	1.6018
hsa-miR-943	0.20534	-0.943191
hsa-miR-196b	0.20583	0.573814
miRNABrightCorner30	0.20621	-0.432667
hsa-miR-376a*	0.2063	-0.545121
hsa-miR-29b-1*	0.20808	0.830999
hsa-miR-548c-5p	0.2088	1.67196
hsa-miR-20a	0.20927	0.340065
hsa-miR-1275	0.20965	0.37378
hsa-miR-558	0.21078	0.575529
hsa-miR-125a-3p	0.21079	0.833517
hsa-miR-216a	0.21115	0.477266
hsa-miR-1281	0.21836	-0.260068
ebv-miR-BART3*	0.21924	-1.29357
hsa-let-7e	0.22101	0.379851
hsa-miR-1290	0.22207	0.800343
hsa-miR-10a*	0.22215	0.975573
hsa-miR-598	0.22278	0.676336
hsa-miR-301b	0.22479	1.33659
hsa-miR-30b	0.2254	0.437154
hsa-miR-34b*	0.22558	0.752006
hcmv-miR-US25-2-5p	0.22629	-0.774715
hsa-miR-30d	0.22633	0.26046
hsa-miR-152	0.22653	0.534993
hsa-miR-140-5p	0.22953	-0.356999
hsa-miR-20b	0.23079	0.369539
hsa-miR-126	0.23133	0.436804
hsa-miR-886-3p	0.23155	0.844172
hsa-miR-1228	0.23251	-0.229076
hsa-miR-99b	0.23535	0.611854
hsa-miR-28-3p	0.23639	0.549106
hsa-miR-450b-3p	0.23667	-0.335124
hsa-miR-139-5p	0.23757	0.595307
hsa-miR-658	0.23769	1.80242
hsa-miR-567	0.23865	0.440109
hsa-miR-363	0.24099	0.37608
hsa-miR-210	0.24182	0.384827
hsa-miR-645	0.24293	-0.976588
hsa-miR-25	0.24336	0.405126
hsa-miR-938	0.24349	-0.476975
hsa-miR-886-5p	0.24406	-0.979475
hsa-miR-200b*	0.24484	0.867057
hsa-miR-1295	0.24489	-0.4856
ebv-miR-BART20-5p	0.24675	-0.820997
hsa-miR-149*	0.24841	1.51962
bkv-miR-B1-5p	0.24872	-0.269413
hsa-miR-30d*	0.25017	0.460821
hsa-miR-19b	0.25029	0.336653
hsa-miR-555	0.25037	-0.545398
hsa-miR-548c-3p	0.25039	0.926202
hsa-miR-17	0.25201	0.3265
hsa-miR-499-3p	0.25226	-0.527163
hcmv-miR-US5-1	0.25278	-1.2487
hsa-miR-183	0.25325	0.389314
hur_6	0.25344	0.271131
hsa-miR-130b	0.25454	0.237375
hsa-miR-30e	0.25592	0.340969
hsa-miR-374a	0.25825	0.4617
kshv-miR-K12-9*	0.25848	-0.625332
hsa-miR-302c*	0.25884	-0.272145
hsa-miR-320c	0.26042	0.271206
hsa-miR-588	0.26118	-0.272251
hsa-miR-194	0.26287	0.513408
hsa-miR-484	0.26516	0.437722
hsa-miR-149	0.2695	-0.353339
hsa-miR-941	0.26987	0.749789
hsa-miR-412	0.27079	-0.277
hsa-miR-187*	0.27226	0.972436
hsa-miR-219-1-3p	0.27351	0.150056
kshv-miR-K12-4-5p	0.27364	-0.333893
hsa-miR-145*	0.27401	-0.270589
hsa-miR-574-3p	0.27484	-0.654932
hsa-miR-27a	0.27635	0.303591
hsa-miR-500*	0.27686	0.34818
hsa-miR-182	0.27821	1.74369
hsa-let-7f	0.27833	0.393622
hsa-miR-487b	0.28001	0.637292
hsa-miR-125b-2*	0.28008	-0.462007
hsa-miR-29b	0.28092	0.391295
hsa-miR-614	0.28137	-0.250604
hsa-miR-1228*	0.28178	0.589726
hsa-miR-18a*	0.28237	-1.00386
hsa-miR-548a-3p	0.2831	-0.456612
hsa-miR-655	0.28686	-0.846925
hsa-miR-888*	0.2874	-0.490605
hsa-miR-190b	0.28771	-0.469229
hsa-miR-549	0.28908	0.382965
hsa-miR-576-5p	0.28931	-0.737394
hsa-miR-511	0.28952	0.486975
hsa-miR-767-3p	0.29003	-0.620435
hsa-miR-93	0.29055	0.360042
hsa-miR-223	0.29095	-0.293854
hsa-miR-320d	0.29275	0.24619
hsa-miR-18b	0.29288	0.364036
ebv-miR-BART6-5p	0.29325	0.76459
hsa-miR-633	0.29496	-0.463359
hsa-miR-760	0.29532	1.56943
hsa-miR-889	0.29589	-0.432404
hsa-miR-16	0.29734	0.256308
hsa-miR-1182	0.29838	0.562802
hsa-miR-141	0.29854	0.527995
hsv1-miR-H1_v14.0	0.29871	1.17348
hsa-miR-129-5p	0.3001	-0.252654
hsa-miR-199a-3p	0.30034	0.34898
hsa-miR-432	0.30081	0.612535
hsa-miR-940	0.30101	-0.210142
hsa-miR-200c*	0.30306	-0.481015
hsa-miR-892a	0.30384	-0.355558
hsa-miR-21*	0.3062	-0.352376
hsa-miR-1276	0.30704	-0.247691
hsa-miR-924	0.30816	-0.46411
hsa-miR-140-3p	0.31197	0.278519
hsa-miR-769-3p	0.31349	0.956974
hsa-miR-1825	0.31351	-0.269705
hsa-miR-19b-2*	0.31488	-0.424119
hsa-miR-181c	0.31521	0.308579
hsa-miR-22	0.31536	0.266506
ebv-miR-BHRF1-1	0.31675	1.01764
hsa-miR-320a	0.31847	0.250947
hcmv-miR-US33-3p	0.3186	-0.711394
hsa-miR-127-3p	0.31961	0.503563
hsa-miR-221*	0.32144	0.491483
hsa-miR-1183	0.3215	0.648967
hsa-miR-142-5p	0.32254	0.300504
hsa-miR-486-5p	0.3243	0.335667
hsa-miR-181c*	0.32594	1.22576
hsa-miR-494	0.3286	0.419713
hsa-miR-139-3p	0.32872	0.311715
hsa-miR-186*	0.32884	-0.880765
hsa-miR-566	0.3291	1.27549
hsa-miR-664	0.32959	0.514897
hsa-miR-662	0.33029	1.5321
hsa-miR-675	0.33103	-0.929625
hsa-miR-542-5p	0.33126	-0.263478
hsa-miR-518e*	0.3347	-0.392855
ebv-miR-BHRF1-2*	0.33767	0.361464
hsa-miR-1254	0.34137	0.491546
hsa-miR-892b	0.34326	1.37816
hsa-miR-220b	0.34358	-0.493226
hsa-miR-589	0.34524	-0.347374
hsa-miR-654-5p	0.34528	1.36187
hsa-miR-18a	0.34724	0.351075
hsa-miR-363*	0.34919	-0.363751
hsa-miR-516b	0.35014	-0.231268
kshv-miR-K12-12	0.35078	-0.776326
hsa-miR-708*	0.35091	-0.864287
hsa-miR-15a*	0.35093	1.29215
hsa-miR-30c-2*	0.35208	0.421728
hsa-miR-27a*	0.35538	-0.846685
hsa-let-7d	0.35623	0.256383
hsa-let-7d*	0.35906	1.02111
hsa-let-7a	0.36209	0.287665
hsa-miR-559	0.36295	0.55807
hsa-miR-23a	0.36392	0.250007
hsa-let-7f-1*	0.36481	-0.224828
ebv-miR-BART11-5p	0.36832	-0.427008
hsa-miR-92a-2*	0.36879	-0.812011
hsa-miR-192	0.36927	0.246982
hsa-miR-644	0.37042	-0.767058
ebv-miR-BHRF1-3	0.3706	-0.176907
hsa-miR-374b	0.37251	0.289221
hsa-miR-200b	0.3729	0.456803
hsa-miR-1827	0.37409	-0.223284
hsa-miR-144	0.37436	0.385709
hsa-miR-1288	0.375	0.589648
hsa-miR-612	0.37558	-0.296064
hsa-miR-92a	0.37572	0.319868
hsa-miR-502-5p	0.37756	0.471616
ebv-miR-BART19-5p	0.37803	-0.284179
hsa-miR-600	0.37863	-0.754551
hsa-miR-202	0.38001	0.625983
hsa-miR-556-5p	0.38015	-0.371436
hsa-miR-1261	0.38191	-0.232065
hsa-miR-302d*	0.38294	-0.334465
hsa-miR-409-3p	0.38335	0.607833
hsa-miR-422a	0.38428	1.31817
hsa-miR-135a*	0.38479	0.289088
hsa-miR-188-3p	0.38565	-0.224668
hsa-miR-155*	0.38733	-0.255691
hsa-miR-767-5p	0.38752	-0.388161
hsa-miR-554	0.38811	0.308538
hsa-miR-505*	0.38834	0.17704
hsa-miR-15a	0.38932	0.213632
hsa-miR-890	0.38935	-0.600525
hsa-miR-181a	0.38975	0.17283
hsa-miR-138-1*	0.39025	0.347388
hsa-miR-330-3p	0.39195	0.280506
hsa-miR-550	0.39226	-0.176265
hsa-miR-652	0.39412	0.220189
hsa-miR-526b	0.3945	-0.419322
hsa-miR-744*	0.39468	-0.356265
hsa-miR-1280	0.39496	-0.134692
hsa-miR-1285	0.3961	0.344118
hsa-miR-9*	0.39715	0.256251
hsa-miR-663	0.39755	0.31979
ebv-miR-BART14*	0.39755	-0.72987
hsa-miR-575	0.40516	-0.384493
hsa-miR-636	0.4064	0.84047
hsa-miR-148a*	0.40721	0.334413
hsa-miR-493	0.40724	1.36783
hsa-miR-1271	0.40736	0.411498
hsa-miR-665	0.40822	0.750507
hsa-miR-584	0.40924	0.43005
hsa-miR-155	0.41062	0.246311
hsa-miR-29c	0.4107	0.202395
hsa-miR-766	0.41265	-0.158413
hsa-miR-483-3p	0.4139	-0.299074
hsa-miR-625*	0.41459	0.957553
mr_1	0.41558	-0.202406
hsa-miR-320b	0.4158	0.203399
hsa-miR-1299	0.41906	0.44544
hsa-miR-1321	0.42013	0.405513
hsa-let-7b	0.42099	0.228502
hsa-miR-1229	0.42132	-0.472075
hsa-miR-423-5p	0.42509	0.187682
hsa-miR-431	0.42595	0.450228
hsa-miR-218-1*	0.42967	0.318924
ebv-miR-BART11-3p	0.43066	-0.402316
hsa-miR-661	0.43138	-0.693294
hsa-miR-513a-5p	0.43508	0.286816
hsa-miR-939	0.43743	0.327166
hsa-miR-935	0.43923	-0.424776
hsa-miR-548i	0.44003	-0.229813
hsa-miR-607	0.44205	-0.306832
hsa-miR-409-5p	0.446	0.794688
hsa-miR-301a	0.44613	0.233352
hsa-miR-146a*	0.44762	-0.351128
hsa-miR-148a	0.44763	0.245012
hsa-miR-625	0.44779	0.18902
ebv-miR-BART9*	0.44913	-0.186568
hsa-miR-648	0.44971	0.499633
hsa-miR-222	0.44985	0.495549
hsa-miR-92a-1*	0.45004	-0.675299
hsa-miR-630	0.45221	0.522959
hur_2	0.45283	-0.128933
hsa-miR-556-3p	0.45779	0.507357
hsa-miR-26a-2*	0.45946	0.287607
hsa-let-7f-2*	0.45955	-0.268119
hsa-miR-532-5p	0.46001	0.268071
hsa-miR-302f	0.46137	-0.20808
hsa-miR-103	0.46319	0.167632
hsa-miR-629	0.46395	0.676926
hsa-miR-525-3p	0.46551	-0.284019
hsa-miR-454	0.46628	0.292203
hsa-miR-802	0.4674	-0.521503
hsa-miR-623	0.4676	0.820762
hsa-miR-23b*	0.46822	0.497294
hsa-miR-33a	0.46998	0.360717
ebv-miR-BART17-5p	0.47039	0.22608
hsa-miR-10b*	0.47319	0.477478
hsa-miR-181a*	0.47361	0.379085
hsa-miR-539	0.47804	0.31599
hsa-let-7i*	0.48121	-0.279218
hsa-miR-184	0.48127	-0.385655
hsa-miR-325	0.48243	-0.5738
hsa-miR-570	0.48251	0.431587
hsa-miR-379	0.48257	0.356908
hsa-miR-302a*	0.48996	-0.25491
hsa-miR-29b-2*	0.49007	0.260679
hsa-miR-765	0.49037	0.219109
hsa-miR-30b*	0.49224	0.333087
ebv-miR-BART8*	0.49321	-0.323915
hsa-miR-30c-1*	0.49414	0.509
hsa-miR-1208	0.49605	-0.272796
hsa-miR-541*	0.49648	-0.295712
hsa-miR-138-2*	0.49676	0.184375
hsa-miR-361-5p	0.49728	0.150634
hsa-miR-340	0.49995	0.478621
hsa-miR-629*	0.50022	-0.239532
hsa-miR-1181	0.5006	-0.486111
hsa-miR-95	0.50254	-0.232633
hsa-miR-16-1*	0.50405	-0.582104
ebv-miR-BART18-5p	0.50562	-0.268367
hsa-miR-337-5p	0.50749	0.307066
hsa-miR-92b*	0.50964	-0.24664
hsa-miR-299-5p	0.51026	-0.206089
hsa-miR-379*	0.51051	-0.227325
hsa-miR-106a*	0.51697	0.351519
hsa-miR-505	0.51826	0.29746
hsa-miR-513a-3p	0.52246	0.304875
hsa-miR-362-3p	0.52621	0.435227
ebv-miR-BART6-3p	0.52844	-0.574344
hsa-miR-590-3p	0.52884	-0.480543
kshv-miR-K12-8_v14.0	0.53264	0.513352
hsa-miR-548j	0.53466	-0.179301
hsa-miR-1469	0.53526	0.428473
hsa-miR-503	0.53538	0.474189
hsa-miR-922	0.53563	-0.240524
hsa-miR-641	0.53731	0.41385
hsa-miR-300	0.53975	0.386273
hsa-miR-513b	0.54244	0.277363
hsa-miR-876-5p	0.54339	-0.257267
ebv-miR-BART2-5p	0.54915	0.190859
hsa-miR-191	0.54934	-0.360335
ebv-miR-BART10*	0.5495	-0.390487
hsa-miR-1202	0.54997	0.2401
hsa-miR-224	0.55	0.283808
hsa-miR-516a-5p	0.55037	-0.454971
hur_4	0.55342	-0.17337
hsa-miR-323b-5p	0.55533	0.297447
hsa-miR-324-3p	0.55548	0.113589
hsa-miR-1909*	0.55584	0.236008
hsa-miR-302b*	0.55894	0.173018
hsa-miR-1306	0.55983	0.4099
hsa-miR-572	0.56075	0.285299
hsa-miR-875-3p	0.56246	-0.260091
hsa-miR-649	0.56412	0.165241
hsa-miR-501-5p	0.56436	0.269346
hsa-miR-617	0.56458	0.248648
hsa-miR-424	0.56558	0.26179
hsa-miR-154	0.56698	-0.194668
hiv1-miR-H1	0.56723	0.305274
hsa-miR-190	0.5692	0.184763
hsa-miR-196a	0.56994	-0.232103
hcmv-miR-US25-1*	0.57051	0.429176
hsa-miR-297	0.57087	0.421618
hsa-miR-483-5p	0.57129	0.195854
hcmv-miR-UL36*	0.57178	0.224867
hsa-miR-1250	0.57221	-0.169891
hsa-miR-876-3p	0.57501	0.242278
hsa-miR-591	0.58196	-0.204326
hsa-miR-181b	0.58301	0.265348
hsa-miR-1180	0.58541	-0.309735
hsa-miR-1323	0.58607	-0.175135
hsa-miR-548b-3p	0.58956	0.492402
hsa-miR-96*	0.59033	-0.199989
hsa-miR-199b-5p	0.59102	0.280139
hsa-miR-1226	0.59678	-0.478038
hsa-miR-758	0.59823	0.791429
ebv-miR-BART7	0.60766	0.587096
hsa-miR-545*	0.60856	0.22771
hsa-miR-491-3p	0.60859	-0.154849
hsa-miR-23b	0.61179	0.115655
hur_1	0.61365	-0.133068
hsa-miR-130b*	0.61473	0.143164
hsa-miR-628-5p	0.61658	0.356378
hsa-miR-502-3p	0.61663	0.150287
hsa-miR-557	0.61674	0.279381
hsa-miR-106b	0.61689	0.140053
hsa-miR-218	0.61777	-0.206539
hsa-miR-1255a	0.6183	0.190294
hsa-miR-934	0.61953	0.637636
hsa-miR-589*	0.61959	0.128582
hsa-miR-193b	0.62612	0.244123
hsa-miR-936	0.62621	0.26619
hsa-miR-452*	0.62688	-0.139474
hsa-miR-887	0.62792	0.580717
ebv-miR-BART4	0.62943	-0.168738
hsa-miR-1226*	0.63348	0.311696
hsa-miR-1300_v13.0	0.63371	0.258969
ebv-miR-BART20-3p	0.63402	0.113037
hsa-miR-875-5p	0.63553	-0.466941
hsa-miR-1826	0.63931	0.241477
hsa-miR-1470	0.64031	-0.326067
hsa-miR-124	0.64073	-0.165546
hsa-miR-33a*	0.64096	0.395684
hsa-miR-381	0.64507	0.238159
hcmv-miR-UL70-3p	0.64609	-0.196733
hsa-miR-498	0.64635	-0.201683
hsa-miR-218-2*	0.65191	-0.406702
hsa-miR-646	0.65218	-0.284019
hsa-miR-744	0.65277	0.280672
hsa-miR-145	0.65321	-0.182105
hsa-miR-621	0.65759	0.307038
hsa-miR-125a-5p	0.65782	0.182139
ebv-miR-BART10	0.658	-0.154021
hsa-miR-99a*	0.66456	-0.399645
kshv-miR-K12-10b	0.66468	0.170897
hsa-miR-450a	0.66632	0.20917
hsa-miR-331-3p	0.67055	0.087827
hsa-miR-659	0.67314	0.264675
hsa-miR-631	0.67713	0.184617
hsa-miR-302c	0.67773	-0.141987
hsa-miR-323-5p	0.68015	-0.221272
ebv-miR-BART2-3p	0.68153	0.206574
hsa-miR-1249	0.68179	-0.091006
hcmv-miR-US5-2	0.68202	0.121991
hsa-miR-573	0.68259	0.133749
hsa-miR-365	0.68383	-0.106119
hsa-miR-1237	0.68463	-0.092993
hsa-miR-182*	0.68582	-0.171409
hsa-miR-127-5p	0.68594	0.148076
hsa-miR-146b-3p	0.68663	0.114237
hsa-miR-24-1*	0.6881	-0.191728
hsa-miR-100	0.68884	0.362226
hsa-miR-135b*	0.69295	-0.159556
hsa-miR-185*	0.69295	0.116646
hsa-miR-331-5p	0.6936	-0.118174
hsa-miR-495	0.695	0.214096
hsa-miR-615-3p	0.69549	0.16159
hsa-miR-770-5p	0.69554	-0.229435
hsa-miR-512-3p	0.69721	0.158701
hsa-miR-624*	0.70279	0.411458
hsa-miR-21	0.70407	0.097848
hsa-miR-324-5p	0.70593	-0.06276
hsa-miR-885-3p	0.71124	-0.153067
hsa-miR-193b*	0.71759	-0.213047
hsa-miR-668	0.71849	-0.120003
hsa-miR-339-5p	0.72357	-0.090434
hsa-miR-200a*	0.72611	0.117011
hsa-miR-19a*	0.72657	-0.086859
hsa-miR-30e*	0.72657	-0.113119
hsa-miR-553	0.72833	0.136819
kshv-miR-K12-1	0.73035	0.144924
hsa-miR-188-5p	0.73157	0.105846
hsa-miR-491-5p	0.73404	0.226489
hsa-miR-449a	0.7345	-0.092027
ebv-miR-BART13*	0.73878	-0.112944
kshv-miR-K12-9	0.74481	-0.113043
ebv-miR-BART8	0.74511	-0.250343
hsa-miR-18b*	0.74651	-0.360378
hsa-miR-142-3p	0.74661	0.12678
hsa-miR-587	0.74778	0.229548
hsa-miR-615-5p	0.75131	0.069615
hsa-let-7a*	0.75353	0.144828
hsa-miR-1915	0.75415	0.122813
hsa-miR-576-3p	0.7562	0.098601
hsa-miR-923_v12.0	0.76404	0.113533
hsa-miR-921	0.76822	-0.180779
hsa-miR-513c	0.77799	0.278397
ebv-miR-BART17-3p	0.77931	-0.145033
hsa-miR-1291	0.78401	0.136514
hsa-miR-593*	0.78497	-0.107792
hsa-miR-639	0.78515	-0.11632
hsa-miR-220a	0.78973	0.138345
hsa-miR-1227	0.79021	0.298924
ebv-miR-BHRF1-2	0.79674	-0.044315
hsa-miR-25*	0.80389	-0.175967
hsa-miR-15b	0.80671	-0.054999
hsa-miR-616	0.80793	0.333919
hsa-miR-626	0.8087	0.069993
hsa-miR-99b*	0.81123	-0.271145
hsa-miR-105*	0.81229	0.068987
hsa-miR-606	0.81235	-0.250253
hsa-miR-133a	0.81317	-0.08757
ebv-miR-BART1-5p	0.81391	-0.063602
hsa-miR-638	0.81458	-0.104906
ebv-miR-BART18-3p	0.81897	0.165522
hsa-miR-942	0.81934	0.08559
hsa-miR-647	0.81986	0.049601
hsa-miR-338-3p	0.82037	0.08198
hsa-miR-1267	0.83077	-0.150189
hsa-miR-134	0.83187	0.088373
hsa-miR-296-5p	0.83427	-0.050912
hsa-miR-451	0.83474	-0.035131
hsa-miR-603	0.83485	-0.064179
hsa-miR-129-3p	0.83793	0.105526
hsa-miR-26a	0.83949	0.057615
hsa-miR-769-5p	0.84044	0.049467
hsa-miR-29a	0.84057	0.052972
hsa-miR-17*	0.84142	-0.073338
hsa-miR-508-5p	0.84409	-0.145371
kshv-miR-K12-11	0.84519	-0.07206
hsa-miR-219-5p	0.84647	0.075285
hsa-miR-579	0.84677	0.079362
ebv-miR-BART5	0.85014	-0.193125
kshv-miR-K12-3*	0.85166	-0.058388
hsa-miR-877*	0.85624	0.205039
ebv-miR-BART14	0.85773	0.082868
hsa-miR-618	0.85869	-0.191557
hsa-miR-34c-5p	0.86011	-0.054845
hcmv-miR-US33-5p	0.86375	-0.172423
hsa-miR-582-5p	0.86673	0.094925
hsa-miR-448	0.86681	0.060518
hsa-miR-377*	0.86802	-0.055246
hsa-miR-328	0.86802	0.088956
hsa-miR-92b	0.87334	0.194946
hsa-miR-1914*	0.88069	-0.038418
hsa-miR-493*	0.88163	0.05718
kshv-miR-K12-3	0.88167	0.063414
hsa-miR-582-3p	0.88172	-0.216822
hsa-miR-874	0.88173	0.078892
hsa-let-7e*	0.88219	0.037527
hsa-miR-1307	0.88444	0.060076
hsa-miR-624	0.8859	0.047253
hsa-miR-616*	0.88824	-0.060842
hsa-miR-340*	0.89115	-0.050273
ebv-miR-BART13	0.89513	0.056219
hsa-miR-129*	0.89614	0.079054
hsa-miR-634	0.89628	0.134804
hsa-miR-411*	0.89859	-0.043398
hsa-miR-24	0.90359	0.030597
hsa-miR-26b*	0.9043	-0.044548
hsa-miR-196a*	0.90602	-0.031781
hsa-miR-651	0.90621	-0.12063
hsa-miR-532-3p	0.90655	-0.053582
hsa-miR-1224-5p	0.90674	-0.059164
kshv-miR-K12-6-5p	0.90987	0.042288
hcmv-miR-UL22A	0.91023	0.040746
hsa-miR-877	0.91139	0.177488
hsa-miR-150*	0.91487	0.033289
hsa-miR-362-5p	0.91529	0.028351
jcv-miR-J1-5p	0.91962	-0.052716
ebv-miR-BART9	0.92006	0.032994
hsa-miR-100*	0.92339	0.042816
hsa-let-7c*	0.93025	-0.043258
hsa-miR-27b*	0.93216	0.055278
hsa-miR-586	0.93305	-0.088886
hsa-miR-105	0.93347	0.032087
hcmv-miR-UL148D	0.93417	-0.070381
hsa-miR-34a	0.93469	0.03667
hsa-miR-944	0.93532	0.089768
kshv-miR-K12-4-3p	0.941	-0.016063
hsa-miR-599	0.94168	0.024112
hsa-miR-635	0.94403	0.029025
ebv-miR-BART15	0.94498	0.045334
hsa-miR-450b-5p	0.94505	0.015089
hsa-miR-485-3p	0.94677	-0.019974
kshv-miR-K12-5_v14.0	0.94738	0.024601
hsa-miR-563	0.94997	0.054506
hsa-miR-550*	0.9503	0.038218
hsa-miR-548b-5p	0.95399	0.021892
hsa-miR-1305	0.95435	-0.012681
hsa-miR-671-5p	0.95689	-0.018486
hsa-miR-542-3p	0.95805	-0.040499
hsa-miR-551b*	0.95949	0.034988
hsa-miR-1268	0.95959	0.01628
hsa-miR-1471	0.95959	0.02537
hsa-miR-544	0.96661	0.013924
hsa-miR-125b-1*	0.96752	-0.013923
hsa-miR-382	0.9676	0.015537
hcmv-miR-US25-1	0.96863	-0.02609
hsa-miR-548a-5p	0.97032	0.021396
hsa-miR-1225-5p	0.97052	0.011954
hsa-miR-216b	0.97142	0.007826
hsa-miR-30c	0.97222	0.007962
hsa-miR-543	0.97408	-0.010088
hsa-miR-223*	0.97454	-0.013518
hsa-miR-378*	0.97634	0.014721
hsa-miR-345	0.97727	-0.015062
hsa-miR-654-3p	0.97896	0.01501
hsa-miR-133b	0.98227	0.01494
hsa-miR-217	0.98314	-0.008885
hsa-miR-1236	0.98547	-0.013701
hsa-miR-374a*	0.98592	-0.007271
hsa-miR-1207-5p	0.9864	-0.007727
hsa-miR-130a*	0.98691	0.004103
hsa-miR-193a-3p	0.98745	-0.006798
hsa-miR-335*	0.98834	-0.00575
hsa-miR-596	0.98958	-0.010839
hsa-miR-28-5p	0.98962	-0.003002
hsa-miR-1	0.98987	-0.007743
hsa-miR-1224-3p	0.99102	-0.003474
hsa-miR-195*	0.99906	0.000351
