# Supplementary material for: Sunitinib-suppressed miR-452-5p facilitates renal cancer cell invasion and metastasis through modulating SMAD4/SMAD7 signals
Source: Mol Cancer. 2018 Nov 12;17:157. doi: 10.1186/s12943-018-0906-x (PMC6231268; doi:10.1186/s12943-018-0906-x)
Supplement: Supplementary file 3 — Table S3-GSE37989. (XLS 72 kb) [file 12943_2018_906_MOESM3_ESM.xls]

## Sheet: Sheet1
miRNA_ID	P.Value	logFC
hsa-miR-136	1.41e-22	-8.15393
hsa-miR-377	2.66e-20	-7.81389
hsa-miR-33	4.27e-18	-8.69002
hsa-miR-605	3.14e-16	8.24814
hsa-miR-801	7.73e-16	4.33919
hsa-miR-328	1.69e-15	-6.08763
hsa-miR-189	1.76e-15	-6.19469
hsa-miR-502	2.04e-13	-6.36984
hsa-miR-663	5.12e-13	4.83989
hsa-miR-29b	1.37e-12	-1.91919
hsa-miR-765	2.07e-12	4.39977
hsa-miR-29c	3.12e-11	-2.11851
hsa-miR-450	7.18e-11	-6.389
hsa-miR-190	1.24e-10	-7.63886
hsa-miR-518c*	1.38e-10	7.90326
kshv-miR-K12-10a	1.43e-10	7.92819
kshv-miR-K12-10b	2.13e-10	7.78673
hsa-miR-631	2.21e-10	6.76739
ebv-miR-BART19	2.36e-10	4.94922
hsa-miR-659	2.83e-10	7.08369
hsa-miR-584	2.87e-10	7.51452
hsa-miR-452	3.52e-10	2.71929
hsa-miR-296	4.31e-10	3.40783
hsa-miR-368	6.56e-10	-6.02313
hsa-miR-141	6.74e-10	-9.39797
ebv-miR-BART13	2.29e-09	2.11905
kshv-miR-K12-3	2.33e-09	2.39436
hsa-miR-487b	3.33e-09	-5.40277
hsa-miR-638	3.45e-09	2.47453
hsa-miR-671	4.74e-09	3.17794
hsa-miR-219	4.74e-09	-6.55546
hsa-miR-518f*	7.19e-09	5.91787
hsa-miR-526a	7.85e-09	5.9091
hsa-miR-610	1.46e-08	7.38058
hsa-miR-188	1.49e-08	2.62536
hsa-miR-494	2e-08	2.45998
hsa-miR-575	2.02e-08	2.9076
hsa-miR-370	2.7e-08	3.29274
ebv-miR-BHRF1-1	3.12e-08	6.43484
hsa-miR-101	5.48e-08	-1.14324
hsa-miR-583	7.4e-08	5.54604
hsa-miR-30e-5p	7.47e-08	-1.19977
hsv1-miR-H1	9.7e-08	7.06294
hsa-miR-455	1.03e-07	-4.88964
hsa-miR-19a	1.25e-07	-1.20695
hsa-miR-526b	2.02e-07	4.89294
hsa-miR-10b	2.21e-07	-1.8097
hsa-miR-200c	2.34e-07	-7.75141
hsa-miR-29a	2.44e-07	-0.98362
hsa-miR-623	2.59e-07	6.06504
hsa-miR-630	2.65e-07	3.90127
hcmv-miR-US4	3.58e-07	6.41123
hsa-miR-127	3.64e-07	-4.4622
hsa-miR-198	3.74e-07	4.44617
hsa-miR-527	4.48e-07	5.00474
hsa-miR-125a	4.92e-07	-0.87174
hsa-miR-516-5p	5.49e-07	4.12916
hsa-miR-542-3p	7.09e-07	-4.35489
hcmv-miR-UL70-3p	7.34e-07	2.60616
hsa-miR-498	7.42e-07	4.41758
ebv-miR-BART7	1.06e-06	4.58039
hsa-miR-32	1.97e-06	-1.0353
hsa-miR-572	2.06e-06	1.89938
hsa-miR-335	2.72e-06	-4.37728
hsa-miR-376a	2.87e-06	-4.14688
hsa-miR-564	2.92e-06	2.94917
hsa-miR-622	2.93e-06	5.7546
hsa-miR-560	3.2e-06	5.40845
hsa-miR-491	3.43e-06	-4.52475
hsa-miR-139	4.09e-06	-3.39699
hsa-miR-93	4.14e-06	1.17304
hsa-miR-639	4.27e-06	2.84893
hsa-miR-492	4.34e-06	3.25633
hsa-miR-513	4.52e-06	3.774
hsa-miR-658	5.15e-06	2.96968
hsa-miR-602	5.67e-06	5.98326
hsa-miR-566	5.82e-06	4.02224
hcmv-miR-US25-1	5.82e-06	2.97041
DarkCorner	6.62e-06	0.93067
dmr_285	6.62e-06	0.93067
dmr_3	6.62e-06	0.93067
dmr_308	6.62e-06	0.93067
dmr_316	6.62e-06	0.93067
dmr_31a	6.62e-06	0.93067
dmr_6	6.62e-06	0.93067
ebv-miR-BART1-3p	6.62e-06	0.93067
ebv-miR-BART10	6.62e-06	0.93067
ebv-miR-BART11-3p	6.62e-06	0.93067
ebv-miR-BART11-5p	6.62e-06	0.93067
ebv-miR-BART12	6.62e-06	0.93067
ebv-miR-BART14-3p	6.62e-06	0.93067
ebv-miR-BART14-5p	6.62e-06	0.93067
ebv-miR-BART15	6.62e-06	0.93067
ebv-miR-BART16	6.62e-06	0.93067
ebv-miR-BART17-5p	6.62e-06	0.93067
ebv-miR-BART18	6.62e-06	0.93067
ebv-miR-BART2	6.62e-06	0.93067
ebv-miR-BART20-3p	6.62e-06	0.93067
ebv-miR-BART20-5p	6.62e-06	0.93067
ebv-miR-BART3-3p	6.62e-06	0.93067
ebv-miR-BART3-5p	6.62e-06	0.93067
ebv-miR-BART4	6.62e-06	0.93067
ebv-miR-BART5	6.62e-06	0.93067
ebv-miR-BART6-3p	6.62e-06	0.93067
ebv-miR-BART6-5p	6.62e-06	0.93067
ebv-miR-BART8-5p	6.62e-06	0.93067
ebv-miR-BART9	6.62e-06	0.93067
ebv-miR-BHRF1-2	6.62e-06	0.93067
ebv-miR-BHRF1-2*	6.62e-06	0.93067
ebv-miR-BHRF1-3	6.62e-06	0.93067
hcmv-miR-UL22A*	6.62e-06	0.93067
hcmv-miR-UL70-5p	6.62e-06	0.93067
hcmv-miR-US25-2-3p	6.62e-06	0.93067
hcmv-miR-US5-2	6.62e-06	0.93067
hsa-miR-105	6.62e-06	0.93067
hsa-miR-137	6.62e-06	0.93067
hsa-miR-147	6.62e-06	0.93067
hsa-miR-153	6.62e-06	0.93067
hsa-miR-202*	6.62e-06	0.93067
hsa-miR-208	6.62e-06	0.93067
hsa-miR-220	6.62e-06	0.93067
hsa-miR-302a	6.62e-06	0.93067
hsa-miR-302a*	6.62e-06	0.93067
hsa-miR-302b	6.62e-06	0.93067
hsa-miR-302b*	6.62e-06	0.93067
hsa-miR-302c*	6.62e-06	0.93067
hsa-miR-302d	6.62e-06	0.93067
hsa-miR-325	6.62e-06	0.93067
hsa-miR-329	6.62e-06	0.93067
hsa-miR-337	6.62e-06	0.93067
hsa-miR-33b	6.62e-06	0.93067
hsa-miR-346	6.62e-06	0.93067
hsa-miR-363*	6.62e-06	0.93067
hsa-miR-367	6.62e-06	0.93067
hsa-miR-369-3p	6.62e-06	0.93067
hsa-miR-371	6.62e-06	0.93067
hsa-miR-372	6.62e-06	0.93067
hsa-miR-373	6.62e-06	0.93067
hsa-miR-376a*	6.62e-06	0.93067
hsa-miR-380-3p	6.62e-06	0.93067
hsa-miR-380-5p	6.62e-06	0.93067
hsa-miR-383	6.62e-06	0.93067
hsa-miR-384	6.62e-06	0.93067
hsa-miR-412	6.62e-06	0.93067
hsa-miR-432*	6.62e-06	0.93067
hsa-miR-433	6.62e-06	0.93067
hsa-miR-448	6.62e-06	0.93067
hsa-miR-449b	6.62e-06	0.93067
hsa-miR-453	6.62e-06	0.93067
hsa-miR-454-5p	6.62e-06	0.93067
hsa-miR-485-5p	6.62e-06	0.93067
hsa-miR-488	6.62e-06	0.93067
hsa-miR-496	6.62e-06	0.93067
hsa-miR-511	6.62e-06	0.93067
hsa-miR-512-5p	6.62e-06	0.93067
hsa-miR-515-3p	6.62e-06	0.93067
hsa-miR-515-5p	6.62e-06	0.93067
hsa-miR-516-3p	6.62e-06	0.93067
hsa-miR-517*	6.62e-06	0.93067
hsa-miR-517a	6.62e-06	0.93067
hsa-miR-517b	6.62e-06	0.93067
hsa-miR-517c	6.62e-06	0.93067
hsa-miR-518a	6.62e-06	0.93067
hsa-miR-518c	6.62e-06	0.93067
hsa-miR-518d	6.62e-06	0.93067
hsa-miR-518e	6.62e-06	0.93067
hsa-miR-518f	6.62e-06	0.93067
hsa-miR-519a	6.62e-06	0.93067
hsa-miR-519b	6.62e-06	0.93067
hsa-miR-519c	6.62e-06	0.93067
hsa-miR-519d	6.62e-06	0.93067
hsa-miR-519e	6.62e-06	0.93067
hsa-miR-520a	6.62e-06	0.93067
hsa-miR-520a*	6.62e-06	0.93067
hsa-miR-520c	6.62e-06	0.93067
hsa-miR-520d	6.62e-06	0.93067
hsa-miR-520f	6.62e-06	0.93067
hsa-miR-520g	6.62e-06	0.93067
hsa-miR-520h	6.62e-06	0.93067
hsa-miR-521	6.62e-06	0.93067
hsa-miR-522	6.62e-06	0.93067
hsa-miR-524	6.62e-06	0.93067
hsa-miR-525	6.62e-06	0.93067
hsa-miR-525*	6.62e-06	0.93067
hsa-miR-526b*	6.62e-06	0.93067
hsa-miR-526c	6.62e-06	0.93067
hsa-miR-539	6.62e-06	0.93067
hsa-miR-544	6.62e-06	0.93067
hsa-miR-548a	6.62e-06	0.93067
hsa-miR-548b	6.62e-06	0.93067
hsa-miR-548c	6.62e-06	0.93067
hsa-miR-548d	6.62e-06	0.93067
hsa-miR-549	6.62e-06	0.93067
hsa-miR-551a	6.62e-06	0.93067
hsa-miR-552	6.62e-06	0.93067
hsa-miR-553	6.62e-06	0.93067
hsa-miR-554	6.62e-06	0.93067
hsa-miR-555	6.62e-06	0.93067
hsa-miR-556	6.62e-06	0.93067
hsa-miR-558	6.62e-06	0.93067
hsa-miR-561	6.62e-06	0.93067
hsa-miR-562	6.62e-06	0.93067
hsa-miR-567	6.62e-06	0.93067
hsa-miR-568	6.62e-06	0.93067
hsa-miR-570	6.62e-06	0.93067
hsa-miR-573	6.62e-06	0.93067
hsa-miR-578	6.62e-06	0.93067
hsa-miR-579	6.62e-06	0.93067
hsa-miR-580	6.62e-06	0.93067
hsa-miR-581	6.62e-06	0.93067
hsa-miR-586	6.62e-06	0.93067
hsa-miR-587	6.62e-06	0.93067
hsa-miR-588	6.62e-06	0.93067
hsa-miR-589	6.62e-06	0.93067
hsa-miR-591	6.62e-06	0.93067
hsa-miR-593	6.62e-06	0.93067
hsa-miR-595	6.62e-06	0.93067
hsa-miR-597	6.62e-06	0.93067
hsa-miR-599	6.62e-06	0.93067
hsa-miR-600	6.62e-06	0.93067
hsa-miR-603	6.62e-06	0.93067
hsa-miR-604	6.62e-06	0.93067
hsa-miR-606	6.62e-06	0.93067
hsa-miR-607	6.62e-06	0.93067
hsa-miR-608	6.62e-06	0.93067
hsa-miR-609	6.62e-06	0.93067
hsa-miR-611	6.62e-06	0.93067
hsa-miR-613	6.62e-06	0.93067
hsa-miR-614	6.62e-06	0.93067
hsa-miR-616	6.62e-06	0.93067
hsa-miR-618	6.62e-06	0.93067
hsa-miR-619	6.62e-06	0.93067
hsa-miR-620	6.62e-06	0.93067
hsa-miR-621	6.62e-06	0.93067
hsa-miR-626	6.62e-06	0.93067
hsa-miR-633	6.62e-06	0.93067
hsa-miR-635	6.62e-06	0.93067
hsa-miR-637	6.62e-06	0.93067
hsa-miR-641	6.62e-06	0.93067
hsa-miR-642	6.62e-06	0.93067
hsa-miR-643	6.62e-06	0.93067
hsa-miR-644	6.62e-06	0.93067
hsa-miR-646	6.62e-06	0.93067
hsa-miR-647	6.62e-06	0.93067
hsa-miR-649	6.62e-06	0.93067
hsa-miR-651	6.62e-06	0.93067
hsa-miR-655	6.62e-06	0.93067
hsa-miR-656	6.62e-06	0.93067
hsa-miR-657	6.62e-06	0.93067
hsa-miR-661	6.62e-06	0.93067
hsa-miR-668	6.62e-06	0.93067
hsa-miR-675	6.62e-06	0.93067
hsa-miR-767-5p	6.62e-06	0.93067
hsa-miR-802	6.62e-06	0.93067
kshv-miR-K12-1	6.62e-06	0.93067
kshv-miR-K12-11	6.62e-06	0.93067
kshv-miR-K12-12	6.62e-06	0.93067
kshv-miR-K12-2	6.62e-06	0.93067
kshv-miR-K12-3*	6.62e-06	0.93067
kshv-miR-K12-4-3p	6.62e-06	0.93067
kshv-miR-K12-4-5p	6.62e-06	0.93067
kshv-miR-K12-5	6.62e-06	0.93067
kshv-miR-K12-6-3p	6.62e-06	0.93067
kshv-miR-K12-6-5p	6.62e-06	0.93067
kshv-miR-K12-9	6.62e-06	0.93067
NC1_00000197	6.62e-06	0.93067
NC1_00000215	6.62e-06	0.93067
NC2_00079215	6.62e-06	0.93067
NC2_00092197	6.62e-06	0.93067
NC2_00106057	6.62e-06	0.93067
NC2_00122731	6.62e-06	0.93067
NegativeControl	6.62e-06	0.93067
SCorner3	6.62e-06	0.93067
hsa-miR-769-3p	8.2e-06	4.1164
hsa-miR-486	8.32e-06	2.35614
ebv-miR-BART17-3p	8.89e-06	3.20802
hsa-miR-425-5p	9.2e-06	0.82147
hsa-miR-25	9.24e-06	1.07711
hsa-miR-769-5p	9.55e-06	-2.66465
hsa-miR-509	9.91e-06	-5.5032
hsa-miR-99a	1.1e-05	-1.63037
hsa-miR-203	1.16e-05	-5.40208
hsa-miR-542-5p	1.22e-05	-3.62184
hsa-miR-422a	1.38e-05	3.53552
hsa-miR-617	1.45e-05	3.57538
hsa-miR-648	1.47e-05	4.20383
hsa-miR-520e	1.5e-05	3.57919
mr_1	1.58e-05	1.13346
hsa-miR-374	1.58e-05	-0.837
hur_1	1.62e-05	0.75971
hsa-miR-767-3p	1.77e-05	2.22923
hsa-miR-212	1.88e-05	1.04717
hsa-miR-145	1.98e-05	-1.342
hsa-miR-223	2.16e-05	1.91776
hsa-miR-520b	2.21e-05	3.88779
hsa-miR-191	2.69e-05	0.67064
hsa-miR-185	2.87e-05	0.82153
hsa-miR-451	3.11e-05	2.51716
hsa-miR-15b	3.25e-05	1.02689
hsa-miR-19b	3.6e-05	-0.70704
hcmv-miR-UL148D	3.8e-05	3.7508
hsa-miR-640	4.28e-05	2.18208
hur_5	4.61e-05	1.25208
kshv-miR-K12-8	4.94e-05	3.87681
hsa-miR-148a	4.95e-05	-1.09113
hsa-miR-612	5.08e-05	2.23044
hsa-miR-204	5.12e-05	-4.19477
hsa-miR-523	5.74e-05	2.47977
hsa-miR-557	6.12e-05	5.40588
hsa-miR-490	6.32e-05	2.29419
hsa-miR-130a	6.45e-05	-0.86941
hsa-miR-660	6.6e-05	-1.56186
hsa-miR-181a	7.66e-05	1.01788
hcmv-miR-US33	8.06e-05	2.89536
hsa-miR-520d*	9.3e-05	1.62643
ebv-miR-BART8-3p	9.72e-05	1.52444
hsa-miR-1	9.78e-05	-5.1683
hsa-miR-130b	9.84e-05	1.46402
hsa-miR-598	0.000122	-3.72334
hsa-miR-766	0.000192	2.05458
hsa-miR-505	0.00021	-2.82421
hsa-miR-100	0.000213	-1.35098
hsa-miR-155	0.000216	2.30819
hsa-miR-582	0.000217	-3.73296
hsa-miR-524*	0.000217	1.62049
hsa-miR-18b	0.000281	-3.00896
hsa-let-7g	0.000293	-0.45044
hsa-miR-504	0.000306	-3.98327
hur_2	0.000319	0.5575
hsa-let-7a	0.000327	-0.51707
hsa-miR-95	0.00037	-3.01531
hsa-miR-21	0.000397	1.63643
hsa-miR-645	0.000448	1.52709
hsa-miR-551b	0.000455	-3.89957
hcmv-miR-UL112	0.000482	1.53829
hsa-miR-503	0.000506	-3.2026
hsa-miR-576	0.000527	1.74033
hcmv-miR-UL22A	0.000539	-3.82455
hsa-miR-378	0.000552	-4.28269
hsa-miR-563	0.000598	3.76576
hsa-miR-519e*	0.000619	3.74883
hsa-miR-200a	0.000623	-1.52677
hsa-miR-518b	0.000643	1.78938
hsa-miR-26a	0.000731	-0.55284
hsa-miR-195	0.000759	-1.05866
hsa-miR-30d	0.000762	-0.75271
hsa-miR-99b	0.000763	-0.53787
kshv-miR-K12-7	0.000845	3.53596
hsa-miR-421	0.000857	-3.40418
hsa-miR-23a	0.000858	0.6782
hsa-miR-301	0.000862	-2.04842
hsa-miR-135a	0.000871	-6.05476
hsa-miR-431	0.00088	1.6424
hsa-miR-500	0.000896	-1.96529
hsa-miR-126	0.000918	-1.05197
hsa-miR-423	0.000962	-3.32985
hsa-miR-324-3p	0.00103	0.59286
hsa-miR-143	0.00106	-1.06693
hsa-let-7f	0.00122	-0.47309
hsa-miR-7	0.00122	-2.42803
hsa-miR-194	0.00138	-2.27092
hsa-miR-128b	0.00158	-0.64646
hsa-miR-154	0.00187	-3.52729
hsa-miR-429	0.00221	-2.3615
hsa-miR-545	0.00262	-2.57722
hsa-miR-148b	0.0027	-0.506
hsa-miR-27b	0.00271	-0.77963
hsa-miR-662	0.003	3.81126
hsa-miR-615	0.00309	-2.41456
hsa-miR-320	0.00333	0.55834
hsa-miR-484	0.00366	0.5641
hsa-let-7e	0.00403	-0.33086
hsa-miR-192	0.00428	-2.03954
hsa-miR-768-3p	0.00432	0.50423
hsa-miR-493-5p	0.00436	-2.97405
hsa-miR-10a	0.0044	-0.99027
hsa-miR-340	0.00459	-2.97599
hsa-miR-381	0.00482	-3.27366
hsa-miR-342	0.00547	0.80963
hsa-miR-199a	0.00612	-1.03991
hsa-miR-215	0.00639	-2.54866
hsa-miR-628	0.00663	-2.80121
hsa-miR-23b	0.00667	-0.64381
hsa-let-7i	0.00759	0.50719
hsa-miR-493-3p	0.0077	2.65579
hsa-miR-186	0.00806	-0.32336
hsa-miR-92b	0.0081	-2.39987
hsa-miR-532	0.00913	-0.94472
hsa-miR-501	0.00928	-2.63977
hsa-let-7b	0.00958	-0.34216
hsa-miR-30a-5p	0.0097	-0.78807
hsa-miR-151	0.0105	0.36295
hsa-miR-125b	0.0111	-0.66033
hsa-miR-26b	0.0116	-0.35776
hsa-miR-508	0.0121	-2.93674
hsa-miR-324-5p	0.0124	-0.43713
hsa-miR-636	0.0136	-2.74423
hsa-miR-126*	0.0142	-0.80849
hsa-miR-128a	0.0143	-1.12314
hsa-miR-379	0.0156	-2.97639
hsa-miR-187	0.0159	-2.78826
hsa-miR-191*	0.0173	1.34178
hsa-miR-206	0.0175	1.74939
hsa-miR-132	0.0178	0.59261
hur_4	0.019	-0.43995
hsa-miR-338	0.0199	-0.64653
hsa-miR-758	0.023	0.76676
hsa-miR-27a	0.023	0.45845
hur_6	0.0234	0.46709
hsa-miR-16	0.0245	0.45445
hsa-let-7c	0.0257	-0.35095
hsa-miR-330	0.0266	-2.49734
hsa-miR-182*	0.0273	0.76637
hsa-miR-149	0.0281	-2.70704
hsa-miR-376b	0.0288	-2.60272
hsa-miR-124a	0.0291	-3.14627
hsa-miR-218	0.0294	-1.4882
hsa-miR-768-5p	0.0314	0.65986
hsa-miR-134	0.0347	2.80713
hsa-miR-632	0.0356	1.27415
hsa-miR-299-5p	0.0369	-2.29979
hsa-miR-146b	0.0378	1.05953
hsa-miR-629	0.0403	2.29854
hsa-miR-559	0.0407	0.7458
hsa-miR-30e-3p	0.0413	-0.50377
hsa-miR-210	0.0428	1.49378
hsa-miR-205	0.0431	2.25131
hsa-miR-409-5p	0.0441	0.74366
hsa-miR-569	0.0461	0.74084
kshv-miR-K12-9*	0.0484	1.99337
hsa-miR-497	0.0488	-0.56134
hsa-miR-146a	0.0493	0.6124
hsa-miR-138	0.0511	-3.13747
hsa-miR-596	0.0516	-1.89554
hsa-miR-424	0.0516	-0.71412
hsa-miR-362	0.0534	-0.69923
hcmv-miR-US5-1	0.0549	0.72064
hsa-miR-489	0.0555	-3.09938
hsa-miR-454-3p	0.056	0.4232
hsa-miR-514	0.0619	-2.89723
hsa-miR-181b	0.0621	0.46994
hsa-miR-452*	0.0638	-2.2025
hsa-miR-323	0.0643	0.72727
hsa-miR-28	0.0673	0.28594
hsa-miR-627	0.0711	-1.68469
hsa-miR-30a-3p	0.0806	-0.54533
hsa-miR-107	0.0811	-0.18769
hsa-miR-422b	0.0822	0.63591
hsa-miR-653	0.0907	-2.02325
hsa-miR-98	0.0924	-0.29438
hsa-miR-135b	0.0952	-2.59906
hsa-miR-103	0.101	0.19209
hsa-miR-302c	0.105	0.70321
hsa-miR-487a	0.114	0.69597
hsa-miR-196b	0.116	0.53131
hsa-miR-634	0.119	1.82809
hsa-miR-224	0.122	1.87792
hsa-miR-181d	0.122	0.36598
hsa-miR-506	0.123	-1.88354
hsa-miR-184	0.123	1.82915
hsa-miR-331	0.126	-0.26898
hsa-miR-369-5p	0.127	0.68851
hsa-miR-485-3p	0.129	0.6877
hsa-miR-222	0.14	0.61615
hcmv-miR-US25-2-5p	0.142	-1.64602
hsa-miR-193b	0.153	0.57861
hsa-miR-9*	0.16	-1.92536
hsa-miR-217	0.162	-1.41813
hsa-miR-339	0.166	-0.33637
hsa-miR-654	0.166	1.48251
hsa-miR-375	0.169	0.65422
hsa-miR-129	0.169	0.6573
hsa-miR-183	0.17	-1.67442
hsa-miR-106b	0.178	0.29189
hsa-miR-565	0.18	0.39691
miRNABrightCorner30	0.186	-0.329
hsa-miR-142-3p	0.189	0.60701
hsa-miR-22	0.19	-0.26713
hsa-miR-601	0.191	1.13652
hsa-miR-34b	0.197	0.52185
hsa-miR-30c	0.199	-0.38089
hsa-miR-140	0.206	-0.23013
hsa-miR-200b	0.207	-0.58311
hsa-miR-221	0.216	0.48413
hsa-miR-199a*	0.221	-0.42957
hsa-miR-571	0.23	1.01546
hsa-miR-133a	0.237	-1.38032
hsa-miR-483	0.25	0.52889
hsa-miR-34a	0.263	0.43456
hsa-miR-499	0.271	0.51146
hsa-miR-373*	0.274	1.13699
hsa-miR-15a	0.275	0.22577
hsa-miR-122a	0.28	1.8064
hsa-miR-299-3p	0.284	0.51049
hsa-miR-133b	0.284	-1.23599
hsa-miR-510	0.299	1.48853
hsa-miR-550	0.301	-0.99387
hsa-miR-200a*	0.321	1.25853
ebv-miR-BART1-5p	0.327	0.52386
hsa-miR-363	0.327	-0.45761
hsa-miR-30b	0.339	-0.20802
hsa-miR-495	0.339	-0.89521
hsa-miR-574	0.344	-0.12322
hsa-miR-365	0.348	0.21549
hsa-miR-142-5p	0.363	0.39849
hsa-miR-181c	0.365	-0.22772
hsa-miR-181a*	0.397	-0.46067
hsa-miR-17-5p	0.407	0.14993
hsa-miR-382	0.419	-0.68547
hsa-miR-144	0.422	-0.57978
hsa-miR-625	0.424	-0.49252
hsa-miR-199b	0.431	0.93706
hsa-miR-592	0.439	1.25244
hsa-miR-512-3p	0.453	-1.00457
hsa-miR-182	0.458	0.76846
hsa-miR-34c	0.463	0.69491
hsa-miR-193a	0.466	0.22213
hsa-miR-154*	0.467	0.42512
hsa-miR-216	0.469	0.39328
hcmv-miR-UL36	0.488	-0.85622
hsa-miR-196a	0.503	0.1473
hsa-miR-449	0.516	0.35149
hsa-miR-507	0.521	-0.64055
hsa-miR-96	0.523	0.56178
hsa-miR-410	0.56	-0.54668
hsa-miR-577	0.564	0.36841
hsa-miR-17-3p	0.57	-0.09142
hsa-miR-345	0.573	-0.11214
hsa-miR-20a	0.573	-0.12043
hsa-miR-432	0.615	-0.40572
hsa-miR-92	0.617	0.09596
hsa-miR-590	0.629	-0.07577
hsa-miR-326	0.644	0.31345
hsa-miR-361	0.649	-0.04908
hsa-miR-585	0.651	0.25916
hsa-miR-24	0.678	-0.05766
hsa-miR-31	0.74	-0.53545
hsa-miR-18a*	0.754	0.19033
hsa-miR-20b	0.757	0.05256
hsa-miR-425-3p	0.77	0.17988
hsa-let-7d	0.785	0.0281
hsa-miR-202	0.789	-0.11716
hsa-miR-152	0.789	-0.05878
hsa-miR-9	0.809	-0.39371
hsa-miR-624	0.834	-0.12764
hsa-miR-150	0.841	-0.09451
hsa-miR-650	0.846	-0.23247
hsa-miR-409-3p	0.869	-0.18564
hsa-miR-211	0.895	0.08777
hsa-miR-214	0.903	0.03831
hsa-miR-18a	0.921	-0.02536
hsa-miR-652	0.929	0.01205
hsa-miR-411	0.946	0.04835
hsa-miR-197	0.953	0.00902
hsa-miR-106a	0.96	0.00842
hsa-miR-770-5p	0.97	0.04584
