# Supplementary material for: Sunitinib-suppressed miR-452-5p facilitates renal cancer cell invasion and metastasis through modulating SMAD4/SMAD7 signals
Source: Mol Cancer. 2018 Nov 12;17:157. doi: 10.1186/s12943-018-0906-x (PMC6231268; doi:10.1186/s12943-018-0906-x)
Supplement: Supplementary file 4 — Table S4. miR-452-5p expression in RCC and normal renal samples from TCGA RCC dataset. (XLS 137 kb) [file 12943_2018_906_MOESM4_ESM.xls]

## Sheet: Sheet1
Table S4. miR-452-5p expression in RCC and normal renal samples from RCC TCGA dataset
ID	expression	Type
TCGA-B8-5552-11A-01R-1671-13	37.0793	Normal
TCGA-GL-7966-11A-01R-2203-13	101.642	Normal
TCGA-CZ-4863-11A-01R-1502-13	20.1689	Normal
TCGA-CZ-4864-11A-01R-1502-13	12.3674	Normal
TCGA-CW-5580-11A-02R-1671-13	12.021	Normal
TCGA-CZ-5458-11A-01R-1502-13	11.8228	Normal
TCGA-B0-5691-11A-01R-1540-13	14.2194	Normal
TCGA-CZ-5455-11A-01R-1502-13	22.1179	Normal
TCGA-CJ-5679-11A-01R-1540-13	17.1109	Normal
TCGA-B0-5701-11A-01R-1540-13	27.2028	Normal
TCGA-CJ-5689-11A-01R-1540-13	24.588	Normal
TCGA-DZ-6132-11A-01R-1964-13	26.8434	Normal
TCGA-A3-3387-11A-01R-1540-13	9.18833	Normal
TCGA-BQ-5875-11A-01R-1591-13	32.9017	Normal
TCGA-CZ-5454-11A-01R-1502-13	12.9435	Normal
TCGA-CZ-5451-11A-01R-1502-13	10.6249	Normal
TCGA-CJ-5680-11A-01R-1540-13	33.3595	Normal
TCGA-B0-5711-11A-01R-1671-13	11.6554	Normal
TCGA-A3-3358-11A-01R-1540-13	9.50396	Normal
TCGA-GL-A9DE-11A-11R-A37G-13	20.8773	Normal
TCGA-CZ-5467-11A-01R-1502-13	17.2025	Normal
TCGA-CZ-5461-11A-01R-1502-13	16.8704	Normal
TCGA-CZ-5466-11A-01R-1502-13	24.6815	Normal
TCGA-B0-5699-11A-01R-1540-13	5.91951	Normal
TCGA-CZ-5469-11A-01R-1502-13	9.06562	Normal
TCGA-B0-5712-11A-01R-1671-13	28.5149	Normal
TCGA-BQ-7046-11A-01R-1964-13	4.39696	Normal
TCGA-CZ-5462-11A-01R-1502-13	21.0948	Normal
TCGA-CZ-5985-11A-01R-1671-13	4.23518	Normal
TCGA-CW-5591-11A-01R-1540-13	36.0471	Normal
TCGA-BQ-7045-11A-01R-1964-13	12.6324	Normal
TCGA-BQ-5882-11A-01R-1591-13	9.93698	Normal
TCGA-CJ-5676-11A-01R-1540-13	20.1665	Normal
TCGA-CW-5584-11A-01R-1540-13	31.7513	Normal
TCGA-GL-6846-11A-01R-1964-13	11.1896	Normal
TCGA-CW-5587-11A-01R-1540-13	9.2897	Normal
TCGA-CZ-5456-11A-02R-1502-13	17.8243	Normal
TCGA-CZ-5452-11A-01R-1502-13	16.2166	Normal
TCGA-A4-A57E-11A-11R-A26Y-13	24.9714	Normal
TCGA-BQ-7051-11A-02R-1964-13	24.4853	Normal
TCGA-B0-5706-11A-01R-1540-13	9.88751	Normal
TCGA-B0-5705-11A-01R-1540-13	9.77225	Normal
TCGA-BQ-5887-11A-01R-1964-13	23.8782	Normal
TCGA-B0-4700-11A-01R-1540-13	5.63464	Normal
TCGA-B0-5697-11A-01R-1540-13	6.85658	Normal
TCGA-BQ-5879-11A-01R-1591-13	13.7325	Normal
TCGA-CJ-5678-11A-01R-1540-13	10.142	Normal
TCGA-B9-4115-11A-01R-1757-13	16.2791	Normal
TCGA-B0-5696-11A-01R-1540-13	8.14896	Normal
TCGA-B0-5694-11A-01R-1540-13	23.6476	Normal
TCGA-CW-6090-11A-01R-1671-13	10.1848	Normal
TCGA-CZ-5984-11A-01R-1671-13	8.28032	Normal
TCGA-CZ-5986-11A-01R-1671-13	8.68836	Normal
TCGA-B2-5641-11A-01R-1540-13	13.3298	Normal
TCGA-CZ-5982-11A-01R-1671-13	7.15256	Normal
TCGA-BQ-5888-11A-01R-1591-13	32.7754	Normal
TCGA-GL-A59R-11A-11R-A26Y-13	22.4196	Normal
TCGA-DZ-6134-11A-01R-1964-13	31.4508	Normal
TCGA-CZ-5987-11A-01R-1671-13	36.306	Normal
TCGA-BQ-7044-11A-01R-1964-13	16.0947	Normal
TCGA-CW-5585-11A-01R-1540-13	11.9091	Normal
TCGA-BQ-5891-11A-01R-1591-13	18.2925	Normal
TCGA-B0-5690-11A-01R-1540-13	9.30631	Normal
TCGA-CZ-5988-11A-01R-1671-13	6.03111	Normal
TCGA-B0-5709-11A-01R-1540-13	14.1963	Normal
TCGA-DZ-6133-11A-01R-1964-13	10.2629	Normal
TCGA-BQ-5894-11A-01R-1591-13	14.9575	Normal
TCGA-CJ-6030-11A-01R-1671-13	13.6371	Normal
TCGA-BQ-5884-11A-01R-1591-13	14.0193	Normal
TCGA-CZ-5465-11A-01R-1502-13	14.1836	Normal
TCGA-CZ-5453-11A-01R-1502-13	13.7393	Normal
TCGA-B0-5703-11A-01R-1540-13	21.0411	Normal
TCGA-DZ-6131-11A-01R-1964-13	12.2184	Normal
TCGA-A4-A4ZT-11A-11R-A26Y-13	16.1306	Normal
TCGA-CZ-5468-11A-01R-1502-13	17.6567	Normal
TCGA-B8-4622-11A-01R-1757-13	25.4534	Normal
TCGA-BQ-7055-11A-01R-1964-13	11.3981	Normal
TCGA-B8-5549-11A-01R-1540-13	14.3235	Normal
TCGA-BQ-7059-11A-01R-1964-13	18.5729	Normal
TCGA-CZ-5457-11A-01R-1502-13	25.2401	Normal
TCGA-A4-7288-11A-01R-2138-13	92.0838	Normal
TCGA-A4-A5Y1-11A-11R-A28L-13	14.7272	Normal
TCGA-P4-A5E8-11A-12R-A28L-13	18.4371	Normal
TCGA-P4-A5ED-11A-11R-A28L-13	21.0634	Normal
TCGA-BQ-5877-11A-01R-1591-13	17.1604	Normal
TCGA-CJ-5677-11A-01R-1540-13	15.6981	Normal
TCGA-BQ-5890-11A-01R-1591-13	40.3666	Normal
TCGA-CZ-5470-11A-01R-1502-13	20.1612	Normal
TCGA-B8-4619-11A-01R-1757-13	14.365	Normal
TCGA-B0-5402-11A-01R-1502-13	25.0351	Normal
TCGA-BQ-7061-11A-01R-1964-13	35.8086	Normal
TCGA-CJ-5681-11A-01R-1540-13	8.20627	Normal
TCGA-B2-5636-11A-01R-1540-13	13.4146	Normal
TCGA-CJ-5672-11A-01R-1540-13	15.6959	Normal
TCGA-CZ-4865-11A-01R-1502-13	16.6181	Normal
TCGA-CW-6088-11A-01R-1671-13	10.669	Normal
TCGA-CW-5581-11A-01R-1540-13	7.37177	Normal
TCGA-CZ-5989-11A-01R-1671-13	24.7404	Normal
TCGA-BQ-5878-11A-01R-1591-13	18.5611	Normal
TCGA-Y8-A8RY-11A-11R-A37G-13	23.1937	Normal
TCGA-CW-6087-11A-01R-1671-13	11.8671	Normal
TCGA-B8-4620-11A-01R-1757-13	33.2357	Normal
TCGA-CW-5589-11A-01R-1540-13	15.5895	Normal
TCGA-CZ-5463-11A-01R-1502-13	11.888	Normal
TCGA-B0-4712-11A-02R-1502-13	21.6141	Normal
TCGA-IA-A83W-01A-11R-A359-13	59.1571	Tumor
TCGA-A3-3385-01A-02R-1419-13	23.1693	Tumor
TCGA-A3-3311-01A-02R-1324-13	66.9646	Tumor
TCGA-CZ-5985-01A-11R-1671-13	91.9387	Tumor
TCGA-DW-7842-01A-11R-2138-13	2.24476	Tumor
TCGA-BP-5173-01A-01R-1425-13	25.9314	Tumor
TCGA-DZ-6131-01A-11R-1964-13	46.0613	Tumor
TCGA-DV-5575-01A-01R-1540-13	42.3607	Tumor
TCGA-CW-6087-01A-11R-1671-13	57.1912	Tumor
TCGA-BP-4161-01A-02R-1324-13	165.759	Tumor
TCGA-A3-A8OW-01A-11R-A37P-13	145.591	Tumor
TCGA-UZ-A9Q0-01A-12R-A42U-13	1.15427	Tumor
TCGA-EV-5901-01A-11R-1591-13	37.2128	Tumor
TCGA-BP-4337-01A-01R-1288-13	39.936	Tumor
TCGA-F9-A7Q0-01A-11R-A36A-13	11.3182	Tumor
TCGA-PJ-A8JU-01A-11R-A36A-13	14.9609	Tumor
TCGA-B3-4103-01A-02R-1350-13	9.97695	Tumor
TCGA-GL-A9DC-01A-11R-A37G-13	42.0915	Tumor
TCGA-A4-7996-01A-11R-2203-13	3.01757	Tumor
TCGA-BP-5201-01A-01R-1425-13	66.8631	Tumor
TCGA-CW-5587-01A-01R-1540-13	78.6479	Tumor
TCGA-UN-AAZ9-01A-11R-A38N-13	11.7112	Tumor
TCGA-BP-5200-01A-01R-1425-13	37.2946	Tumor
TCGA-CZ-4862-01A-01R-1304-13	87.7382	Tumor
TCGA-BP-4962-01A-01R-1333-13	70.6968	Tumor
TCGA-CJ-4904-01A-02R-1425-13	73.6149	Tumor
TCGA-B0-5102-01A-01R-1419-13	33.7828	Tumor
TCGA-B0-5705-01A-11R-1540-13	29.4695	Tumor
TCGA-CJ-4918-01A-01R-1425-13	66.6136	Tumor
TCGA-B0-4691-01A-01R-1276-13	21.7632	Tumor
TCGA-B8-4619-01A-01R-1187-13	24.295	Tumor
TCGA-Y8-A8S1-01A-11R-A37G-13	45.2765	Tumor
TCGA-MM-A84U-01A-11R-A37P-13	176.974	Tumor
TCGA-UZ-A9PJ-01A-11R-A38N-13	1.82119	Tumor
TCGA-BP-5004-01A-01R-1333-13	55.0752	Tumor
TCGA-B0-5119-01A-02R-1419-13	70.3699	Tumor
TCGA-B1-A47N-01A-11R-A25B-13	16.7059	Tumor
TCGA-SX-A7SS-01A-11R-A36A-13	15.7029	Tumor
TCGA-B0-5106-01A-01R-1419-13	81.4949	Tumor
TCGA-CW-5584-01A-01R-1540-13	135.22	Tumor
TCGA-IA-A83S-01A-11R-A359-13	14.7258	Tumor
TCGA-IZ-8195-01A-31R-2401-13	10.8001	Tumor
TCGA-A3-A6NI-01A-11R-A33A-13	107.024	Tumor
TCGA-2Z-A9JP-01A-11R-A42U-13	8.01852	Tumor
TCGA-P4-AAVL-01A-11R-A42U-13	36.7809	Tumor
TCGA-B0-4816-01A-01R-1502-13	83.6548	Tumor
TCGA-B0-4700-01A-02R-1540-13	44.9087	Tumor
TCGA-CJ-5680-01A-11R-1540-13	35.0397	Tumor
TCGA-DZ-6135-01A-11R-1964-13	13.429	Tumor
TCGA-MH-A855-01A-11R-A359-13	17.8429	Tumor
TCGA-BP-4974-01A-01R-1333-13	124.355	Tumor
TCGA-G7-7501-01A-11R-2203-13	10.1097	Tumor
TCGA-B0-5098-01A-01R-1419-13	109.332	Tumor
TCGA-2Z-A9J5-01A-21R-A38N-13	15.1751	Tumor
TCGA-BP-4766-01A-01R-1288-13	41.9508	Tumor
TCGA-Y8-A894-01A-11R-A36A-13	1.55158	Tumor
TCGA-B2-5633-01A-01R-1540-13	60.495	Tumor
TCGA-2Z-A9J7-01A-11R-A38N-13	2.91741	Tumor
TCGA-B0-4822-01A-01R-1276-13	21.4784	Tumor
TCGA-AK-3460-01A-02R-1276-13	49.3391	Tumor
TCGA-HE-A5NJ-01A-11R-A26Y-13	7.6383	Tumor
TCGA-BP-4799-01A-01R-1304-13	189.165	Tumor
TCGA-A3-3320-01A-01T-0860-13	63.4547	Tumor
TCGA-B3-4104-01A-02R-1350-13	14.3244	Tumor
TCGA-A4-A5DU-01A-11R-A28L-13	4.75605	Tumor
TCGA-B0-5402-01A-01R-1502-13	170.674	Tumor
TCGA-A3-3357-01A-02R-1419-13	13.1799	Tumor
TCGA-AK-3428-01A-02R-1276-13	65.0424	Tumor
TCGA-B0-4833-01A-01R-1304-13	32.7111	Tumor
TCGA-A3-3317-01A-01T-0860-13	77.4035	Tumor
TCGA-V9-A7HT-01A-11R-A342-13	14.1477	Tumor
TCGA-BP-4992-01A-01R-1762-13	27.2445	Tumor
TCGA-B8-A54E-01A-11R-A25Z-13	24.1957	Tumor
TCGA-B0-5092-01A-01R-1419-13	37.9159	Tumor
TCGA-5P-A9K4-01A-11R-A42U-13	92.2678	Tumor
TCGA-5P-A9JV-01A-12R-A42U-13	116.713	Tumor
TCGA-EU-5906-01A-11R-1671-13	42.72	Tumor
TCGA-BP-4968-01A-01R-1333-13	29.3415	Tumor
TCGA-DV-5565-01A-01R-1540-13	142.878	Tumor
TCGA-B0-4703-01A-01R-1276-13	58.2723	Tumor
TCGA-BP-4976-01A-01R-1333-13	41.2923	Tumor
TCGA-B1-5398-01A-02R-1591-13	20.2822	Tumor
TCGA-B8-5546-01A-01R-1540-13	12.1086	Tumor
TCGA-B8-5550-01A-01R-1540-13	47.1314	Tumor
TCGA-B8-4620-01A-01R-1187-13	102.76	Tumor
TCGA-BQ-5881-01A-11R-1591-13	28.9447	Tumor
TCGA-B4-5832-01A-11R-1671-13	210.691	Tumor
TCGA-MH-A857-01A-11R-A359-13	10.8479	Tumor
TCGA-CJ-4636-01A-01R-1187-13	20.4023	Tumor
TCGA-B0-4813-01A-01R-1276-13	27.9467	Tumor
TCGA-B2-5635-01A-01R-1540-13	79.505	Tumor
TCGA-BP-4781-01A-01R-1304-13	42.0472	Tumor
TCGA-B9-A5W7-01A-11R-A31S-13	3.80157	Tumor
TCGA-UZ-A9PL-01A-11R-A38N-13	17.6871	Tumor
TCGA-AK-3436-01A-02R-1324-13	53.5883	Tumor
TCGA-A3-3374-01A-01T-0860-13	6.296	Tumor
TCGA-SX-A7SQ-01A-12R-A36A-13	27.1682	Tumor
TCGA-DW-7834-01A-11R-2138-13	24.8117	Tumor
TCGA-B0-5691-01A-11R-1540-13	39.4298	Tumor
TCGA-BP-4765-01A-01R-1288-13	41.9267	Tumor
TCGA-B8-4143-01A-01T-1187-13	25.5024	Tumor
TCGA-PJ-A5Z8-01A-11R-A28L-13	30.2536	Tumor
TCGA-BP-4771-01A-01R-1762-13	83.0449	Tumor
TCGA-AL-3467-01A-02R-1350-13	2.24369	Tumor
TCGA-BP-4174-01A-02R-1288-13	37.3829	Tumor
TCGA-B0-5690-01A-11R-1540-13	93.8492	Tumor
TCGA-CW-5591-01A-01R-1540-13	194.302	Tumor
TCGA-BP-4176-01A-02R-1288-13	49.7696	Tumor
TCGA-B0-5080-01A-01R-1502-13	64.8818	Tumor
TCGA-SX-A71V-01A-11R-A342-13	5.00706	Tumor
TCGA-P4-A5E7-01A-31R-A28L-13	21.0933	Tumor
TCGA-5P-A9K0-01A-11R-A42U-13	4.85856	Tumor
TCGA-A3-3387-01A-01R-1540-13	68.4165	Tumor
TCGA-B0-4698-01A-01R-1502-13	54.4508	Tumor
TCGA-CJ-4637-01A-01R-1187-13	42.5864	Tumor
TCGA-CJ-5682-01A-11R-1540-13	185.193	Tumor
TCGA-BP-4998-01A-01R-1333-13	83.8355	Tumor
TCGA-CZ-5988-01A-11R-1671-13	120.051	Tumor
TCGA-DW-5561-01A-01R-1591-13	16.2715	Tumor
TCGA-BP-5191-01A-01R-1425-13	101.409	Tumor
TCGA-A3-3308-01A-02R-1324-13	78.9125	Tumor
TCGA-GL-A4EM-01A-11R-A25B-13	29.2945	Tumor
TCGA-BQ-7061-01A-11R-1964-13	43.5753	Tumor
TCGA-AK-3458-01A-01R-1502-13	57.8786	Tumor
TCGA-BP-4173-01A-02R-1762-13	31.9935	Tumor
TCGA-A3-3370-01A-02R-1419-13	30.8415	Tumor
TCGA-CJ-5671-01A-11R-1540-13	104.158	Tumor
TCGA-B0-4824-01A-01R-1276-13	18.3705	Tumor
TCGA-B9-4117-01A-02R-1350-13	17.9668	Tumor
TCGA-BQ-7046-01A-11R-1964-13	9.32561	Tumor
TCGA-BP-4326-01A-01R-1288-13	27.9614	Tumor
TCGA-BP-4329-01A-02R-1288-13	56.1711	Tumor
TCGA-B0-4712-01A-01R-1502-13	61.2374	Tumor
TCGA-BQ-7062-01A-11R-1964-13	11.5541	Tumor
TCGA-SX-A7SU-01A-11R-A36A-13	15.8598	Tumor
TCGA-UZ-A9PU-01A-11R-A42U-13	1.61529	Tumor
TCGA-CJ-4897-01A-03R-1425-13	59.8419	Tumor
TCGA-UZ-A9PR-01A-11R-A42U-13	3.40216	Tumor
TCGA-BP-4763-01A-01R-1288-13	101.976	Tumor
TCGA-4A-A93Y-01A-11R-A37G-13	70.5253	Tumor
TCGA-B9-A44B-01A-11R-A25B-13	153.554	Tumor
TCGA-UZ-A9PP-01A-11R-A42U-13	30.1678	Tumor
TCGA-A4-7915-01A-11R-2203-13	170.575	Tumor
TCGA-B0-5694-01A-11R-1540-13	158.938	Tumor
TCGA-BP-4345-01A-01R-1288-13	81.8131	Tumor
TCGA-BP-5174-01A-01R-1425-13	145.044	Tumor
TCGA-BP-4987-01A-01R-1762-13	52.0557	Tumor
TCGA-BP-5176-01A-01R-1425-13	89.0351	Tumor
TCGA-B0-5696-01A-11R-1540-13	70.9323	Tumor
TCGA-G7-6790-01A-11R-1964-13	17.8423	Tumor
TCGA-B0-4696-01A-01R-1276-13	10.0819	Tumor
TCGA-B0-4699-01A-01R-1276-13	48.6465	Tumor
TCGA-DV-A4W0-05A-11R-A25Z-13	30.2901	Tumor
TCGA-B0-5697-01A-11R-1540-13	115.061	Tumor
TCGA-AL-3472-01A-01T-1192-13	5.41454	Tumor
TCGA-B2-5633-01A-01R-A27D-13	62.4349	Tumor
TCGA-AK-3431-01A-02R-1276-13	54.1487	Tumor
TCGA-B0-5084-01A-01R-1762-13	6.56473	Tumor
TCGA-BP-5010-01A-02R-1419-13	31.6324	Tumor
TCGA-MH-A55W-01A-11R-A26Y-13	5.09113	Tumor
TCGA-DZ-6133-01A-11R-1964-13	5.45993	Tumor
TCGA-BP-5168-01A-01R-1419-13	5.27008	Tumor
TCGA-A4-8311-01A-11R-2401-13	20.7099	Tumor
TCGA-CW-6088-01A-11R-1671-13	79.779	Tumor
TCGA-B8-4622-01A-02R-1276-13	206.646	Tumor
TCGA-A4-8516-01A-11R-2401-13	2.62915	Tumor
TCGA-B1-A47M-01A-11R-A25B-13	9.12733	Tumor
TCGA-B0-5702-01A-11R-1540-13	81.5537	Tumor
TCGA-B4-5378-01A-01R-1502-13	27.3234	Tumor
TCGA-B8-5164-01A-01R-1419-13	21.3727	Tumor
TCGA-CZ-4860-01A-01R-1304-13	32.1433	Tumor
TCGA-CJ-6030-01A-11R-1671-13	53.5504	Tumor
TCGA-AK-3433-01A-02R-1276-13	9.1132	Tumor
TCGA-CZ-5469-01A-01R-1502-13	41.6922	Tumor
TCGA-CZ-5463-01A-01R-1502-13	192.105	Tumor
TCGA-AK-3434-01A-02R-1276-13	87.0008	Tumor
TCGA-AL-3466-01A-02R-1350-13	40.2532	Tumor
TCGA-B0-5120-01A-01R-1419-13	100.136	Tumor
TCGA-BP-5194-01A-02R-1425-13	44.6716	Tumor
TCGA-GL-A9DD-01A-11R-A37G-13	18.5415	Tumor
TCGA-CJ-4873-01A-01R-1304-13	60.1714	Tumor
TCGA-CJ-4635-01A-02R-1304-13	18.227	Tumor
TCGA-2Z-A9JL-01A-11R-A42U-13	13.5671	Tumor
TCGA-B0-5812-01A-11R-1671-13	69.9	Tumor
TCGA-F9-A8NY-01A-11R-A36A-13	102.909	Tumor
TCGA-BP-5202-01A-02R-1425-13	83.562	Tumor
TCGA-B0-5077-01A-01R-1333-13	25.389	Tumor
TCGA-A4-7734-01A-11R-2138-13	21.7162	Tumor
TCGA-BP-5170-01A-01R-1425-13	85.8377	Tumor
TCGA-CJ-4876-01A-01R-1304-13	22.0641	Tumor
TCGA-CW-5590-01A-01R-1540-13	38.1224	Tumor
TCGA-B0-4846-01A-01R-1276-13	122.023	Tumor
TCGA-A3-A8CQ-01A-11R-A37P-13	68.4008	Tumor
TCGA-B9-A8YH-01A-11R-A37G-13	8.93267	Tumor
TCGA-B8-A54F-01A-11R-A25Z-13	30.2198	Tumor
TCGA-Y8-A896-01A-11R-A36A-13	10.6933	Tumor
TCGA-CJ-5672-01A-11R-1540-13	116.432	Tumor
TCGA-SX-A71W-01A-12R-A359-13	7.25821	Tumor
TCGA-B0-4811-01A-01R-1502-13	31.5301	Tumor
TCGA-HE-A5NF-01A-11R-A26Y-13	13.4335	Tumor
TCGA-BQ-5894-01A-11R-1591-13	96.6847	Tumor
TCGA-B0-4852-01A-01R-1502-13	62.1707	Tumor
TCGA-B2-4099-01A-02T-1187-13	116.302	Tumor
TCGA-EV-5902-01A-11R-1591-13	2.27475	Tumor
TCGA-B0-4836-01A-01R-1762-13	113.409	Tumor
TCGA-2Z-A9JE-01A-11R-A42U-13	1.7474	Tumor
TCGA-Y8-A895-01A-11R-A36A-13	13.8955	Tumor
TCGA-BQ-7048-01A-11R-1964-13	28.6313	Tumor
TCGA-BQ-5882-01A-11R-1591-13	91.2176	Tumor
TCGA-A3-3324-01A-02R-1324-13	39.5926	Tumor
TCGA-CZ-5467-01A-01R-1502-13	74.0444	Tumor
TCGA-B1-A47O-01A-11R-A25B-13	36.2112	Tumor
TCGA-CJ-4907-01A-01R-1425-13	88.9158	Tumor
TCGA-AK-3447-01A-01T-0860-13	20.9327	Tumor
TCGA-BP-5187-01A-01R-1425-13	39.4784	Tumor
TCGA-P4-A5E6-01A-11R-A28L-13	15.8748	Tumor
TCGA-B0-5712-01A-11R-1671-13	29.8036	Tumor
TCGA-CJ-6028-01A-11R-1671-13	124.347	Tumor
TCGA-AL-A5DJ-01A-11R-A26Y-13	15.0732	Tumor
TCGA-J7-A8I2-01A-12R-A36A-13	66.7924	Tumor
TCGA-A4-A7UZ-01A-12R-A359-13	9.71783	Tumor
TCGA-2Z-A9J9-01A-11R-A42U-13	37.1148	Tumor
TCGA-4A-A93W-01A-11R-A37G-13	15.1585	Tumor
TCGA-AK-3461-01A-02R-1276-13	37.9826	Tumor
TCGA-DW-7839-01A-11R-2138-13	3.00021	Tumor
TCGA-CZ-4864-01A-01R-1502-13	28.3172	Tumor
TCGA-P4-AAVM-01A-11R-A42U-13	11.759	Tumor
TCGA-BP-4965-01A-01R-1762-13	85.3902	Tumor
TCGA-CJ-4905-01A-02R-1425-13	81.3173	Tumor
TCGA-CJ-5683-01A-11R-1540-13	101.089	Tumor
TCGA-2Z-A9J2-01A-11R-A38N-13	63.9992	Tumor
TCGA-2Z-A9JS-01A-21R-A42U-13	4.10109	Tumor
TCGA-B2-3924-01A-02R-A27D-13	35.0146	Tumor
TCGA-BP-4776-01A-01R-1288-13	108.884	Tumor
TCGA-A4-7287-01A-11R-2138-13	425.439	Tumor
TCGA-SX-A7SR-01A-12R-A36A-13	3.08273	Tumor
TCGA-BP-5186-01A-01R-1425-13	34.8948	Tumor
TCGA-A3-A6NJ-01A-12R-A33A-13	37.6067	Tumor
TCGA-CJ-4643-01A-01R-1187-13	47.5007	Tumor
TCGA-G7-6789-01A-11R-1964-13	103.657	Tumor
TCGA-A3-3313-01A-01T-0860-13	37.8287	Tumor
TCGA-B0-5100-01A-01R-1419-13	32.6409	Tumor
TCGA-AK-3440-01A-02R-1276-13	20.5626	Tumor
TCGA-CJ-4881-01A-01R-1762-13	230.621	Tumor
TCGA-B0-5107-01A-01R-1419-13	1.83116	Tumor
TCGA-B3-8121-01A-21R-2401-13	8.85758	Tumor
TCGA-DW-5560-01A-01R-1591-13	13.9006	Tumor
TCGA-CJ-4872-01A-01R-1304-13	92.6753	Tumor
TCGA-BQ-5877-01A-11R-1591-13	122.682	Tumor
TCGA-CJ-4912-01A-01R-1425-13	115.204	Tumor
TCGA-Y8-A8RZ-01A-11R-A37G-13	21.0436	Tumor
TCGA-BP-4981-01A-01R-1762-13	250.27	Tumor
TCGA-BP-4975-01A-01R-1762-13	68.697	Tumor
TCGA-B2-5636-01A-02R-1540-13	30.7982	Tumor
TCGA-B8-A54H-01A-11R-A33A-13	41.46	Tumor
TCGA-BQ-5875-01A-11R-1591-13	29.4292	Tumor
TCGA-G7-6796-01A-11R-1964-13	40.2169	Tumor
TCGA-CZ-4865-01A-02R-1502-13	176.503	Tumor
TCGA-BP-4353-01A-02R-1288-13	115.905	Tumor
TCGA-BP-4342-01A-01R-1288-13	58.7379	Tumor
TCGA-BP-4777-01A-01R-1288-13	131.114	Tumor
TCGA-CJ-5675-01A-11R-1540-13	26.9607	Tumor
TCGA-AL-7173-01A-11R-2138-13	52.0532	Tumor
TCGA-A3-3372-01A-02R-1324-13	138.059	Tumor
TCGA-CZ-4853-01A-01R-1425-13	92.6666	Tumor
TCGA-BQ-7045-01A-31R-1964-13	20.7743	Tumor
TCGA-AK-3426-01A-02R-1324-13	27.7115	Tumor
TCGA-5P-A9KE-01A-11R-A42U-13	3.80321	Tumor
TCGA-BP-4330-01A-01R-1288-13	45.5807	Tumor
TCGA-BP-4977-01A-01R-1333-13	145.066	Tumor
TCGA-DW-7838-01A-11R-2138-13	12.8663	Tumor
TCGA-WN-AB4C-01A-11R-A42U-13	31.4305	Tumor
TCGA-BQ-5883-01A-11R-1591-13	20.4727	Tumor
TCGA-CJ-4641-01A-01R-1187-13	30.3327	Tumor
TCGA-GL-7966-01A-11R-2203-13	56.3133	Tumor
TCGA-CZ-4859-01A-02R-1425-13	30.2455	Tumor
TCGA-B0-5075-01A-01R-1762-13	11.2349	Tumor
TCGA-MM-A563-01A-11R-A25Z-13	59.8447	Tumor
TCGA-B2-4102-01A-02R-1324-13	127.377	Tumor
TCGA-B0-4688-01A-01R-1276-13	953.672	Tumor
TCGA-BP-5009-01A-01R-1333-13	46.4379	Tumor
TCGA-A4-A5Y1-01A-11R-A28L-13	80.7061	Tumor
TCGA-B8-5552-01B-11R-1671-13	41.1897	Tumor
TCGA-BP-4985-01A-01R-1333-13	203.482	Tumor
TCGA-BP-5182-01A-01R-1425-13	83.1296	Tumor
TCGA-BQ-5880-01A-11R-1591-13	77.5879	Tumor
TCGA-B8-4151-01A-01T-1187-13	131.983	Tumor
TCGA-A3-A6NN-01A-12R-A33A-13	51.8907	Tumor
TCGA-A4-A57E-01A-11R-A26Y-13	14.0292	Tumor
TCGA-B8-A54J-01A-11R-A33A-13	51.3285	Tumor
TCGA-5P-A9K9-01A-11R-A42U-13	68.2361	Tumor
TCGA-A3-3378-01A-01T-0860-13	114.309	Tumor
TCGA-B2-3923-01A-02R-A27D-13	14.9841	Tumor
TCGA-G7-A8LC-01A-11R-A36A-13	14.3141	Tumor
TCGA-AK-3451-01A-02T-1187-13	22.3209	Tumor
TCGA-A4-8098-01A-11R-2401-13	11.5083	Tumor
TCGA-BP-5195-01A-02R-1425-13	86.5968	Tumor
TCGA-BP-5190-01A-01R-1425-13	183.169	Tumor
TCGA-BP-5000-01A-01R-1762-13	57.5983	Tumor
TCGA-2Z-A9J8-01A-11R-A42U-13	25.1512	Tumor
TCGA-BP-4325-01A-02R-1288-13	32.3077	Tumor
TCGA-B2-3924-01B-03R-A27D-13	39.6737	Tumor
TCGA-BP-4790-01A-01R-1762-13	82.0355	Tumor
TCGA-G7-A8LD-01A-11R-A36A-13	37.1842	Tumor
TCGA-BQ-5879-01A-11R-1591-13	184.613	Tumor
TCGA-BP-4327-01A-01R-1288-13	82.0019	Tumor
TCGA-DW-7840-01A-11R-2138-13	4.47246	Tumor
TCGA-BP-5185-01A-01R-1425-13	29.9822	Tumor
TCGA-BP-4993-01A-02R-1419-13	87.2656	Tumor
TCGA-B8-A8YJ-01A-13R-A39B-13	60.4601	Tumor
TCGA-CZ-4856-01A-02R-1425-13	61.6776	Tumor
TCGA-B8-A7U6-01A-12R-A37P-13	89.1832	Tumor
TCGA-CJ-4891-01A-01R-1762-13	9.49064	Tumor
TCGA-CJ-4638-01A-01R-1187-13	22.9642	Tumor
TCGA-CZ-5461-01A-01R-1502-13	41.4238	Tumor
TCGA-CZ-5455-01A-01R-1502-13	91.481	Tumor
TCGA-BP-5178-01A-01R-1425-13	92.9656	Tumor
TCGA-SX-A7SL-01A-11R-A359-13	4.30691	Tumor
TCGA-CJ-5677-01A-11R-1540-13	110.133	Tumor
TCGA-BP-4797-01A-01R-1762-13	27.4102	Tumor
TCGA-DW-7837-01A-11R-2138-13	5.62678	Tumor
TCGA-B0-5094-01A-01R-1419-13	103.947	Tumor
TCGA-CZ-5464-01A-01R-1502-13	118.583	Tumor
TCGA-B8-5159-01A-01R-1419-13	27.4107	Tumor
TCGA-BP-5192-01A-01R-1425-13	57.9112	Tumor
TCGA-A3-3311-01A-01T-0860-13	115.213	Tumor
TCGA-B9-4114-01A-01T-1192-13	9.99409	Tumor
TCGA-CJ-4890-01A-01R-1304-13	71.5512	Tumor
TCGA-BQ-7049-01A-11R-1964-13	54.8167	Tumor
TCGA-CZ-5457-01A-01R-1502-13	18.0479	Tumor
TCGA-BP-4761-01A-01R-1762-13	44.9892	Tumor
TCGA-B0-4814-01A-01R-1276-13	33.9952	Tumor
TCGA-BP-5177-01A-01R-1425-13	50.648	Tumor
TCGA-BQ-5888-01A-11R-1591-13	75.3419	Tumor
TCGA-P4-A5EB-01A-11R-A28L-13	34.5629	Tumor
TCGA-SX-A7SM-01A-11R-A359-13	149.47	Tumor
TCGA-B0-5096-01A-01R-1419-13	52.0203	Tumor
TCGA-G7-6793-01A-11R-1964-13	37.95	Tumor
TCGA-DW-7836-01A-11R-2138-13	12.0224	Tumor
TCGA-BP-4759-01A-01R-1762-13	42.7472	Tumor
TCGA-BP-5007-01A-01R-1762-13	198.305	Tumor
TCGA-CZ-5987-01A-11R-1671-13	116.896	Tumor
TCGA-BP-4762-01A-02R-1288-13	68.926	Tumor
TCGA-B0-5110-01A-01R-1419-13	84.2579	Tumor
TCGA-A4-8517-01A-11R-2401-13	2.93769	Tumor
TCGA-B2-3923-01B-10R-A27D-13	23.6664	Tumor
TCGA-GL-6846-01A-11R-1964-13	20.9847	Tumor
TCGA-B0-4821-01A-01R-1502-13	259.173	Tumor
TCGA-F9-A97G-01A-11R-A38N-13	44.5258	Tumor
TCGA-A3-3380-01A-01T-0860-13	133.466	Tumor
TCGA-A4-7584-01A-11R-2138-13	5.08492	Tumor
TCGA-B0-4848-01A-01R-1276-13	86.6396	Tumor
TCGA-AK-3430-01A-01T-1187-13	200.281	Tumor
TCGA-EU-5904-01A-11R-1671-13	101.891	Tumor
TCGA-GL-A9DE-01A-11R-A37G-13	30.4465	Tumor
TCGA-B0-5104-01A-01R-1419-13	171.315	Tumor
TCGA-MM-A564-01A-11R-A25Z-13	174.545	Tumor
TCGA-GL-7773-01A-11R-2138-13	9.49937	Tumor
TCGA-P4-A5E8-01A-11R-A28L-13	78.8747	Tumor
TCGA-B9-A5W8-01A-11R-A28L-13	7.9407	Tumor
TCGA-CJ-4869-01A-02R-1425-13	74.2652	Tumor
TCGA-BQ-7055-01A-11R-1964-13	8.426	Tumor
TCGA-B0-4834-01A-01R-1762-13	34.3284	Tumor
TCGA-CZ-4857-01A-01R-1762-13	151.02	Tumor
TCGA-2Z-A9JN-01A-21R-A42U-13	22.6379	Tumor
TCGA-CJ-4875-01A-01R-1762-13	115.254	Tumor
TCGA-A3-3322-01A-01T-0860-13	39.7218	Tumor
TCGA-G7-6795-01A-11R-1964-13	12.2485	Tumor
TCGA-IZ-A6M8-01A-11R-A31S-13	6.62592	Tumor
TCGA-B0-4697-01A-01R-1276-13	35.155	Tumor
TCGA-A3-3365-01A-01T-0860-13	61.3821	Tumor
TCGA-DV-5569-01A-01R-1540-13	134.464	Tumor
TCGA-A3-3351-01A-02R-1324-13	41.2023	Tumor
TCGA-A3-3347-01A-02R-1324-13	97.529	Tumor
TCGA-AK-3445-01A-02R-1276-13	26.3731	Tumor
TCGA-B2-5641-01A-01R-1540-13	36.1512	Tumor
TCGA-BQ-7051-01A-12R-1964-13	3.08948	Tumor
TCGA-BQ-5885-01A-11R-1591-13	173.155	Tumor
TCGA-G6-A5PC-01A-11R-A33A-13	53.9591	Tumor
TCGA-B8-5163-01A-01R-1419-13	175.452	Tumor
TCGA-CJ-4642-01B-02R-1409-13	34.3687	Tumor
TCGA-B0-5695-01A-11R-1540-13	53.4797	Tumor
TCGA-B2-3924-01A-02R-1324-13	23.4982	Tumor
TCGA-IA-A40X-01A-11R-A25B-13	7.89892	Tumor
TCGA-DV-5574-01A-01R-1540-13	44.2611	Tumor
TCGA-2Z-A9JD-01A-11R-A42U-13	18.6679	Tumor
TCGA-B4-5835-01A-11R-1671-13	315.528	Tumor
TCGA-B0-4714-01A-01R-1276-13	36.1584	Tumor
TCGA-2Z-A9J1-01A-11R-A38N-13	16.17	Tumor
TCGA-CZ-5453-01A-01R-1502-13	33.4079	Tumor
TCGA-CZ-4866-01A-01R-1502-13	29.899	Tumor
TCGA-B0-5709-01A-11R-1540-13	32.7465	Tumor
TCGA-CJ-4882-01A-02R-1425-13	58.4926	Tumor
TCGA-B4-5836-01A-11R-1671-13	40.3377	Tumor
TCGA-B9-4617-01A-01R-1192-13	6.59556	Tumor
TCGA-CZ-4863-01A-01R-1502-13	19.7586	Tumor
TCGA-CZ-5984-01A-11R-1671-13	89.0895	Tumor
TCGA-UZ-A9Q1-01A-11R-A42U-13	4.99372	Tumor
TCGA-B0-4945-01A-01R-1419-13	69.1128	Tumor
TCGA-A4-7288-01A-11R-2138-13	6.64057	Tumor
TCGA-B0-5097-01A-01R-1419-13	109.092	Tumor
TCGA-B9-5155-01A-01R-1591-13	9.56727	Tumor
TCGA-5P-A9JZ-01A-11R-A42U-13	4.6541	Tumor
TCGA-2Z-A9JG-01A-11R-A42U-13	15.2695	Tumor
TCGA-BP-4346-01A-01R-1288-13	14.1901	Tumor
TCGA-UZ-A9PM-01A-21R-A38N-13	7.72406	Tumor
TCGA-HE-A5NK-01A-11R-A26Y-13	23.3272	Tumor
TCGA-B3-3926-01A-02R-1350-13	4.15682	Tumor
TCGA-UZ-A9PZ-01A-11R-A42U-13	11.4047	Tumor
TCGA-B9-7268-01A-11R-2138-13	1.54652	Tumor
TCGA-P4-A5EA-01A-11R-A28L-13	54.8654	Tumor
TCGA-2Z-A9JT-01A-11R-A42U-13	11.3848	Tumor
TCGA-A3-3372-01A-01T-0860-13	130.467	Tumor
TCGA-2K-A9WE-01A-11R-A38N-13	15.9524	Tumor
TCGA-CZ-5460-01A-01R-1502-13	27.0692	Tumor
TCGA-B8-A54K-01A-11R-A33A-13	28.8237	Tumor
TCGA-IA-A83V-01A-11R-A359-13	38.0957	Tumor
TCGA-GL-8500-01A-11R-2401-13	4.24656	Tumor
TCGA-BQ-7044-01A-11R-1964-13	4.43847	Tumor
TCGA-BQ-5884-01A-11R-1591-13	16.7396	Tumor
TCGA-UZ-A9PS-05A-11R-A42U-13	27.0267	Tumor
TCGA-BP-4355-01A-01R-1288-13	96.0479	Tumor
TCGA-2Z-A9JM-01A-12R-A42U-13	23.7919	Tumor
TCGA-CJ-4916-01A-01R-1425-13	112.002	Tumor
TCGA-CZ-5451-01A-01R-1502-13	36.5126	Tumor
TCGA-B8-5545-01A-01R-1671-13	47.8014	Tumor
TCGA-CJ-4884-01A-01R-1304-13	18.8794	Tumor
TCGA-AK-3465-01A-01T-0860-13	32.0344	Tumor
TCGA-BP-4770-01A-01R-1502-13	39.1698	Tumor
TCGA-AK-3425-01A-02R-1276-13	141.154	Tumor
TCGA-CJ-4878-01A-01R-1304-13	43.7086	Tumor
TCGA-CZ-5470-01A-01R-1502-13	69.0244	Tumor
TCGA-CJ-4887-01A-01R-1762-13	32.6119	Tumor
TCGA-HE-A5NI-01A-11R-A26Y-13	20.8091	Tumor
TCGA-G7-6797-01A-11R-1964-13	2.93263	Tumor
TCGA-B2-5633-01B-04R-A27D-13	50.4556	Tumor
TCGA-BP-4789-01A-01R-1304-13	116.427	Tumor
TCGA-CZ-5466-01A-01R-1502-13	154.907	Tumor
TCGA-B8-A54I-01A-21R-A33A-13	57.2955	Tumor
TCGA-A4-8312-01A-11R-2401-13	8.77399	Tumor
TCGA-A3-3346-01A-01T-1192-13	159.363	Tumor
TCGA-B0-5121-01A-02R-1419-13	180.46	Tumor
TCGA-MW-A4EC-01A-11R-A25Z-13	43.7831	Tumor
TCGA-A4-8515-01A-11R-2401-13	2.27934	Tumor
TCGA-BP-4971-01A-01R-1762-13	30.5453	Tumor
TCGA-A3-A8OX-01A-11R-A37P-13	69.5333	Tumor
TCGA-B8-A54G-01A-11R-A25Z-13	20.2631	Tumor
TCGA-5P-A9JU-01A-11R-A42U-13	59.8887	Tumor
TCGA-B0-5700-01A-11R-1540-13	42.4777	Tumor
TCGA-DZ-6132-01A-11R-1964-13	25.8069	Tumor
TCGA-HE-A5NH-01A-11R-A26Y-13	1.27883	Tumor
TCGA-B8-5162-01A-01R-1419-13	39.1828	Tumor
TCGA-B0-4827-01A-02R-1419-13	138.038	Tumor
TCGA-CZ-5465-01A-01R-1502-13	123.279	Tumor
TCGA-UZ-A9PX-01A-11R-A42U-13	5.58151	Tumor
TCGA-A3-3383-01A-01T-0860-13	174.771	Tumor
TCGA-A4-7585-01A-11R-2138-13	32.534	Tumor
TCGA-A3-3320-01A-02R-1324-13	43.3722	Tumor
TCGA-WN-A9G9-01A-12R-A37G-13	170.666	Tumor
TCGA-CZ-4854-01A-01R-1762-13	320.407	Tumor
TCGA-BP-4961-01A-01R-1762-13	137.754	Tumor
TCGA-CJ-6033-01A-11R-1671-13	33.423	Tumor
TCGA-A3-3323-01A-01T-0860-13	99.9853	Tumor
TCGA-BP-5196-01A-01R-1425-13	32.0021	Tumor
TCGA-BP-4162-01A-02R-1324-13	35.8223	Tumor
TCGA-B8-5158-01A-01R-1419-13	96.2593	Tumor
TCGA-BP-4159-01A-02R-1288-13	116.136	Tumor
TCGA-T7-A92I-01A-11R-A37P-13	21.2307	Tumor
TCGA-A3-3313-01A-02R-1324-13	41.8867	Tumor
TCGA-BP-4986-01A-01R-1762-13	81.0357	Tumor
TCGA-A3-3378-01A-02R-1324-13	101.413	Tumor
TCGA-B8-5551-01A-01R-1540-13	98.5101	Tumor
TCGA-2Z-A9J6-01A-11R-A38N-13	14.891	Tumor
TCGA-B4-5843-01A-11R-1671-13	91.617	Tumor
TCGA-BP-4332-01A-01R-1288-13	39.7115	Tumor
TCGA-2Z-A9JK-01A-11R-A42U-13	97.689	Tumor
TCGA-B2-A4SR-01A-11R-A25Z-13	88.7932	Tumor
TCGA-4A-A93X-01A-11R-A37G-13	14.1336	Tumor
TCGA-UZ-A9PK-01A-11R-A38N-13	21.5891	Tumor
TCGA-B0-5399-01A-01R-1502-13	51.6964	Tumor
TCGA-B3-A6W5-01A-12R-A342-13	14.0296	Tumor
TCGA-BP-5181-01A-01R-1425-13	63.22	Tumor
TCGA-B4-5844-01A-11R-1671-13	75.8029	Tumor
TCGA-BP-5008-01A-01R-1333-13	44.8618	Tumor
TCGA-UZ-A9PN-01A-11R-A38N-13	71.7288	Tumor
TCGA-AK-3444-01A-01T-0860-13	40.8155	Tumor
TCGA-B0-4810-01A-01R-1502-13	33.1209	Tumor
TCGA-CW-5589-01A-01R-1540-13	76.1337	Tumor
TCGA-2Z-A9JR-01A-12R-A42U-13	4.49786	Tumor
TCGA-BQ-5891-01A-11R-1591-13	167.172	Tumor
TCGA-A4-7997-01A-11R-2203-13	33.6718	Tumor
TCGA-MH-A560-01A-11R-A26Y-13	19.3744	Tumor
TCGA-BP-4334-01A-01R-1288-13	8.29543	Tumor
TCGA-5P-A9K2-01A-11R-A42U-13	3.86766	Tumor
TCGA-CJ-4901-01A-01R-1425-13	104.959	Tumor
TCGA-DV-A4VZ-01A-11R-A25Z-13	32.7016	Tumor
TCGA-B0-4818-01A-01R-1502-13	85.2621	Tumor
TCGA-5P-A9KA-01A-11R-A42U-13	39.5421	Tumor
TCGA-J7-8537-01A-11R-2401-13	24.7041	Tumor
TCGA-A4-8518-01A-11R-2401-13	33.3836	Tumor
TCGA-B1-A655-01A-11R-A31S-13	8.84675	Tumor
TCGA-AK-3453-01A-01T-0860-13	35.4398	Tumor
TCGA-B0-5707-01A-11R-1540-13	19.7082	Tumor
TCGA-BP-4354-01A-02R-1288-13	26.8473	Tumor
TCGA-A4-8630-01A-11R-2401-13	4.10817	Tumor
TCGA-B0-4838-01A-01R-1304-13	66.2364	Tumor
TCGA-B0-4828-01A-01R-1276-13	21.329	Tumor
TCGA-A4-A4ZT-01A-11R-A26Y-13	10.5974	Tumor
TCGA-G6-A8L8-01A-21R-A37P-13	155.744	Tumor
TCGA-O9-A75Z-01A-11R-A342-13	6.34218	Tumor
TCGA-B0-4718-01A-01R-1276-13	41.3072	Tumor
TCGA-AL-3473-01A-01T-1192-13	75.8945	Tumor
TCGA-B3-3925-01A-02R-1350-13	11.193	Tumor
TCGA-CJ-4639-01A-01R-1187-13	57.522	Tumor
TCGA-IZ-8196-01A-11R-2401-13	9.40152	Tumor
TCGA-AK-3427-01A-01T-0860-13	20.9752	Tumor
TCGA-AK-3443-01A-01T-0860-13	8.98256	Tumor
TCGA-BP-5183-01A-01R-1425-13	187.434	Tumor
TCGA-SX-A71S-01A-11R-A342-13	7.43849	Tumor
TCGA-CJ-4920-01A-01R-1425-13	74.2427	Tumor
TCGA-A3-3319-01A-01T-0860-13	147.318	Tumor
TCGA-AK-3440-01A-01T-0860-13	12.5624	Tumor
TCGA-B0-4842-01A-02R-1419-13	28.8472	Tumor
TCGA-B0-4845-01A-01R-1276-13	36.3182	Tumor
TCGA-B0-4694-01A-01R-1276-13	50.1543	Tumor
TCGA-CZ-5452-01A-01R-1502-13	224.466	Tumor
TCGA-DW-7963-01B-11R-A28L-13	6.74753	Tumor
TCGA-CJ-6032-01A-11R-1671-13	44.6643	Tumor
TCGA-CJ-5679-01A-11R-1540-13	237.893	Tumor
TCGA-BP-4163-01A-02R-1324-13	82.3122	Tumor
TCGA-CJ-5684-01A-11R-1540-13	134.126	Tumor
TCGA-B9-A69E-01A-11R-A31S-13	45.702	Tumor
TCGA-BP-4967-01A-01R-1333-13	44.6078	Tumor
TCGA-BP-4768-01A-01R-1288-13	67.5019	Tumor
TCGA-2Z-A9JJ-01A-11R-A42U-13	43.5703	Tumor
TCGA-CZ-5986-01A-11R-1671-13	35.8343	Tumor
TCGA-UZ-A9PQ-01A-11R-A42U-13	27.4412	Tumor
TCGA-5P-A9KF-01A-11R-A42U-13	6.66971	Tumor
TCGA-B1-7332-01A-11R-2138-13	6.50428	Tumor
TCGA-BP-4347-01A-01R-1288-13	34.8018	Tumor
TCGA-A3-3307-01A-01T-0860-13	49.042	Tumor
TCGA-IA-A83T-01A-11R-A359-13	10.8467	Tumor
TCGA-SX-A7SN-01A-11R-A359-13	2.93744	Tumor
TCGA-BP-4335-01A-01R-1288-13	127.265	Tumor
TCGA-BP-4995-01A-01R-1333-13	42.7391	Tumor
TCGA-BP-4795-01A-02R-1419-13	39.9571	Tumor
TCGA-BP-4982-01A-01R-1762-13	191.091	Tumor
TCGA-CJ-4886-01A-01R-1304-13	70.4369	Tumor
TCGA-BP-4769-01A-01R-1288-13	37.8675	Tumor
TCGA-B0-5113-01A-01R-1419-13	42.9287	Tumor
TCGA-2Z-A9JI-01A-11R-A42U-13	85.0242	Tumor
TCGA-BP-4804-01A-02R-1762-13	167.389	Tumor
TCGA-CW-5585-01A-01R-1540-13	52.1041	Tumor
TCGA-2Z-A9JQ-01A-11R-A42U-13	13.4604	Tumor
TCGA-DV-5567-01A-01R-1540-13	18.9882	Tumor
TCGA-G7-7502-01A-11R-2203-13	18.5283	Tumor
TCGA-B0-5400-01A-01R-1502-13	53.0714	Tumor
TCGA-CZ-5462-01A-01R-1502-13	146.483	Tumor
TCGA-BP-4352-01A-01R-1288-13	17.2801	Tumor
TCGA-AT-A5NU-01A-11R-A28L-13	3.64188	Tumor
TCGA-B2-5639-01A-01R-1540-13	223.075	Tumor
TCGA-G7-A4TM-01A-11R-A31S-13	13.2291	Tumor
TCGA-A3-3323-01A-02R-1324-13	86.8743	Tumor
TCGA-BQ-7058-01A-11R-1964-13	21.6655	Tumor
TCGA-BP-4341-01A-01R-1288-13	106.351	Tumor
TCGA-B9-4113-01A-01T-1192-13	3.18146	Tumor
TCGA-BP-4758-01A-01R-1288-13	42.5609	Tumor
TCGA-BP-4167-01A-02R-1324-13	53.5474	Tumor
TCGA-SX-A7SP-01A-11R-A359-13	22.1281	Tumor
TCGA-B8-5165-01A-01R-1419-13	58.1775	Tumor
TCGA-B4-5834-01A-11R-1671-13	82.2232	Tumor
TCGA-A4-A6HP-01A-11R-A31S-13	4.51225	Tumor
TCGA-BP-5199-01A-01R-1425-13	28.6187	Tumor
TCGA-AK-3465-01A-02R-1324-13	24.9598	Tumor
TCGA-CJ-4908-01A-01R-1425-13	80.8721	Tumor
TCGA-BP-4983-01A-01R-1333-13	304.86	Tumor
TCGA-EV-5903-01A-11R-1591-13	48.9546	Tumor
TCGA-B0-5115-01A-01R-1419-13	45.1087	Tumor
TCGA-DV-5568-01A-01R-1540-13	32.6889	Tumor
TCGA-B0-5699-01A-11R-1540-13	34.5826	Tumor
TCGA-HE-A5NL-01A-11R-A26Y-13	8.64272	Tumor
TCGA-B0-5711-01A-11R-1671-13	137.239	Tumor
TCGA-SX-A71U-01A-12R-A342-13	6.95333	Tumor
TCGA-B0-5693-01A-11R-1540-13	106.814	Tumor
TCGA-DW-7841-01A-11R-2138-13	6.69926	Tumor
TCGA-CJ-4923-01A-01R-1425-13	58.9029	Tumor
TCGA-A3-3308-01A-01T-0860-13	124.615	Tumor
TCGA-5P-A9K6-01A-11R-A42U-13	15.6175	Tumor
TCGA-B0-5713-01A-11R-1671-13	46.4537	Tumor
TCGA-5P-A9JY-01A-11R-A42U-13	1.32502	Tumor
TCGA-BP-4960-01A-01R-1762-13	260.939	Tumor
TCGA-CJ-4895-01A-01R-1304-13	23.1979	Tumor
TCGA-KV-A74V-01A-11R-A342-13	19.9739	Tumor
TCGA-BP-4158-01A-02R-1288-13	36.0179	Tumor
TCGA-AK-3450-01A-02R-1276-13	117.323	Tumor
TCGA-B0-4841-01A-01R-1276-13	140.665	Tumor
TCGA-BP-4973-01A-01R-1333-13	124.205	Tumor
TCGA-A3-3367-01A-02R-1419-13	104.629	Tumor
TCGA-AK-3443-01A-02R-1324-13	11.0006	Tumor
TCGA-6D-AA2E-01A-11R-A37P-13	91.8326	Tumor
TCGA-A4-7732-01A-11R-2138-13	1.04893	Tumor
TCGA-B2-4098-01A-02R-1324-13	18.5175	Tumor
TCGA-B4-5377-01A-01R-1502-13	47.9516	Tumor
TCGA-A4-7828-01A-11R-2138-13	39.0053	Tumor
TCGA-B2-5635-01A-01R-A27D-13	108.755	Tumor
TCGA-B1-A657-01A-11R-A31S-13	14.9824	Tumor
TCGA-BQ-7059-01A-11R-1964-13	24.9449	Tumor
TCGA-AS-3777-01A-01T-0860-13	16.5098	Tumor
TCGA-BP-4338-01A-01R-1288-13	114.739	Tumor
TCGA-B8-4154-01A-01T-1187-13	30.9942	Tumor
TCGA-UZ-A9PS-01A-11R-A42U-13	5.29175	Tumor
TCGA-CZ-5458-01A-01R-1502-13	29.1375	Tumor
TCGA-CJ-4900-01A-01R-1762-13	29.8977	Tumor
TCGA-BP-4963-01A-01R-1333-13	26.8769	Tumor
TCGA-CJ-4644-01A-01R-1187-13	31.077	Tumor
TCGA-A3-3349-01A-01T-1187-13	134.275	Tumor
TCGA-B0-4690-01A-01R-1276-13	36.1969	Tumor
TCGA-CW-5588-01A-01R-1540-13	83.3474	Tumor
TCGA-BP-4988-01A-01R-1333-13	89.2633	Tumor
TCGA-AK-3455-01A-01T-0860-13	28.9405	Tumor
TCGA-CW-5583-01A-02R-1540-13	46.9007	Tumor
TCGA-BQ-5893-01A-11R-1591-13	69.5271	Tumor
TCGA-B0-4844-01A-01R-1276-13	20.1761	Tumor
TCGA-MH-A562-01A-11R-A26Y-13	2.58573	Tumor
TCGA-B0-5088-01A-01R-1333-13	36.129	Tumor
TCGA-AK-3444-01A-02R-1324-13	23.4553	Tumor
TCGA-AL-3468-01A-02R-1350-13	4.54215	Tumor
TCGA-BP-4344-01A-01R-1288-13	91.7983	Tumor
TCGA-A3-3383-01A-02R-1324-13	151.331	Tumor
TCGA-G7-A8LB-01A-11R-A36A-13	1.44151	Tumor
TCGA-BQ-5886-01A-11R-1591-13	25.8777	Tumor
TCGA-BP-4994-01A-01R-1762-13	12.2222	Tumor
TCGA-CJ-5689-01A-11R-1540-13	39.8526	Tumor
TCGA-CJ-5686-01A-11R-1671-13	39.1072	Tumor
TCGA-BQ-5892-01A-11R-1591-13	27.0123	Tumor
TCGA-AK-3456-01A-02R-1324-13	6.63122	Tumor
TCGA-CJ-4893-01A-01R-1304-13	35.0064	Tumor
TCGA-BP-4803-01A-01R-1304-13	148.789	Tumor
TCGA-B0-5099-01A-01R-1419-13	42.2722	Tumor
TCGA-BP-4970-01A-01R-1762-13	40.6388	Tumor
TCGA-CJ-4634-01A-01R-1187-13	73.7712	Tumor
TCGA-3Z-A93Z-01A-11R-A37P-13	125.994	Tumor
TCGA-B0-4701-01A-01R-1276-13	79.9518	Tumor
TCGA-G7-A8LE-01A-11R-A36A-13	18.9473	Tumor
TCGA-MH-A55Z-01A-11R-A26Y-13	3.18188	Tumor
TCGA-CW-6093-01A-11R-1671-13	43.4426	Tumor
TCGA-B8-4153-01B-11R-1671-13	141.12	Tumor
TCGA-BP-4807-01A-01R-1304-13	29.0833	Tumor
TCGA-SX-A71R-01A-12R-A342-13	0.765969	Tumor
TCGA-A3-3374-01A-02R-1324-13	4.79977	Tumor
TCGA-2Z-A9J3-01A-12R-A38N-13	3.82979	Tumor
TCGA-P4-AAVK-01A-11R-A42U-13	27.5476	Tumor
TCGA-Y8-A898-01A-11R-A359-13	14.1752	Tumor
TCGA-GL-A59T-01A-21R-A28L-13	10.317	Tumor
TCGA-BP-4798-01A-01R-1304-13	74.5102	Tumor
TCGA-CJ-4892-01A-01R-1304-13	43.052	Tumor
TCGA-AL-3471-01A-02R-1350-13	4.26189	Tumor
TCGA-AK-3454-01A-02R-1276-13	64.1961	Tumor
TCGA-B0-4823-01A-02R-1419-13	37.0918	Tumor
TCGA-Q2-A5QZ-01A-11R-A28L-13	65.6558	Tumor
TCGA-CJ-4885-01A-01R-1304-13	45.8691	Tumor
TCGA-BP-4169-01A-02R-1288-13	53.7118	Tumor
TCGA-B0-5085-01A-01R-1762-13	105.486	Tumor
TCGA-B4-5838-01A-11R-1671-13	63.263	Tumor
TCGA-B0-5095-01A-01R-1419-13	85.7563	Tumor
TCGA-HE-7130-01A-11R-1964-13	262.305	Tumor
TCGA-B0-5081-01A-01R-1333-13	108.177	Tumor
TCGA-CJ-4899-01A-01R-1762-13	33.1089	Tumor
TCGA-G7-6792-01A-21R-1964-13	8.96321	Tumor
TCGA-CZ-5454-01A-01R-1502-13	115.938	Tumor
TCGA-A3-3326-01A-01T-0860-13	101.624	Tumor
TCGA-B9-A5W9-01A-11R-A28L-13	12.8428	Tumor
TCGA-BQ-7050-01A-11R-1964-13	5.74317	Tumor
TCGA-UZ-A9PV-01A-11R-A42U-13	0.974497	Tumor
TCGA-B0-5083-01A-02R-1419-13	21.8778	Tumor
TCGA-B0-4707-01A-01R-1276-13	82.534	Tumor
TCGA-BP-5169-01A-01R-1425-13	13.9338	Tumor
TCGA-Y8-A8S0-01A-11R-A37G-13	12.9915	Tumor
TCGA-IA-A40Y-01A-11R-A25B-13	69.4638	Tumor
TCGA-B1-A654-01A-11R-A31S-13	25.7002	Tumor
TCGA-B8-4148-01A-02R-1324-13	25.858	Tumor
TCGA-PJ-A5Z9-01A-11R-A28L-13	10.1115	Tumor
TCGA-B0-4843-01A-01R-1276-13	96.21	Tumor
TCGA-CZ-5982-01A-11R-1671-13	77.9824	Tumor
TCGA-5P-A9KH-01A-11R-A42U-13	9.14184	Tumor
TCGA-IZ-A6M9-01A-11R-A31S-13	2.30118	Tumor
TCGA-J7-6720-01A-11R-2138-13	27.7479	Tumor
TCGA-B8-5553-01A-01R-1540-13	99.0282	Tumor
TCGA-B0-5706-01A-11R-1540-13	14.0628	Tumor
TCGA-BQ-7056-01A-11R-1964-13	81.6517	Tumor
TCGA-CZ-4858-01A-01R-1304-13	10.3748	Tumor
TCGA-CJ-5681-01A-11R-1540-13	26.6717	Tumor
TCGA-KV-A6GD-01A-11R-A31S-13	52.609	Tumor
TCGA-B2-4101-01A-02R-1276-13	94.2942	Tumor
TCGA-BP-4343-01A-02R-1288-13	143.165	Tumor
TCGA-B8-4146-01B-11R-1671-13	156.95	Tumor
TCGA-A4-A5XZ-01A-11R-A31S-13	11.6701	Tumor
TCGA-UZ-A9PO-01A-11R-A38N-13	10.4223	Tumor
TCGA-CZ-5456-01A-01R-1502-13	115.401	Tumor
TCGA-A3-3382-01A-01T-0860-13	52.1663	Tumor
TCGA-A3-3322-01A-02R-1324-13	27.0342	Tumor
TCGA-BQ-7060-01A-11R-1964-13	14.2793	Tumor
TCGA-BP-4989-01A-01R-1333-13	35.136	Tumor
TCGA-P4-A5ED-01A-11R-A28L-13	14.4995	Tumor
TCGA-B2-5635-01B-04R-A27D-13	88.8779	Tumor
TCGA-BP-5198-01A-01R-1425-13	90.452	Tumor
TCGA-BP-4331-01A-01R-1762-13	63.6327	Tumor
TCGA-AK-3453-01A-02R-1276-13	9.17015	Tumor
TCGA-CJ-6027-01A-11R-1671-13	61.0125	Tumor
TCGA-CJ-4903-01A-01R-1425-13	28.1725	Tumor
TCGA-B2-3923-01A-02R-1324-13	16.8258	Tumor
TCGA-BP-4787-01A-01R-1304-13	85.4761	Tumor
TCGA-B0-4839-01A-01R-1304-13	29.4661	Tumor
TCGA-A3-A8OV-01A-11R-A37P-13	90.9019	Tumor
TCGA-GL-A59R-01A-11R-A26Y-13	7.35037	Tumor
TCGA-KV-A6GE-01A-11R-A31S-13	11.2169	Tumor
TCGA-BP-4160-01A-02R-1288-13	91.2016	Tumor
TCGA-BP-5175-01A-01R-1425-13	105.442	Tumor
TCGA-B0-4819-01A-01R-1276-13	59.8684	Tumor
TCGA-DV-A4W0-01A-11R-A25Z-13	68.1222	Tumor
TCGA-SX-A7SO-01A-11R-A359-13	6.29834	Tumor
TCGA-BP-4340-01A-01R-1762-13	31.897	Tumor
TCGA-A3-3382-01A-02R-1324-13	38.2215	Tumor
TCGA-DZ-6134-01A-11R-1964-13	19.3106	Tumor
TCGA-A3-3358-01A-01R-1540-13	89.8234	Tumor
TCGA-BP-4760-01A-02R-1419-13	30.8824	Tumor
TCGA-IA-A40U-01A-11R-A25B-13	20.0896	Tumor
TCGA-B9-4115-01A-01T-1192-13	4.30587	Tumor
TCGA-DV-A4VX-01A-11R-A25Z-13	177.441	Tumor
TCGA-BP-4782-01A-02R-1419-13	114.32	Tumor
TCGA-5P-A9KC-01A-11R-A42U-13	18.3189	Tumor
TCGA-CW-6097-01A-11R-1671-13	45.4828	Tumor
TCGA-A4-A48D-01A-11R-A25B-13	4.281	Tumor
TCGA-CJ-4902-01A-01R-1425-13	100.673	Tumor
TCGA-B8-A54D-01A-21R-A25Z-13	23.5388	Tumor
TCGA-BP-4775-01A-01R-1288-13	42.8023	Tumor
TCGA-BP-4959-01A-01R-1333-13	111.94	Tumor
TCGA-F9-A4JJ-01A-11R-A25B-13	76.2964	Tumor
TCGA-A4-A772-01A-11R-A342-13	14.1659	Tumor
TCGA-MH-A856-01A-11R-A359-13	17.6286	Tumor
TCGA-P4-AAVO-01A-11R-A42U-13	10.0212	Tumor
TCGA-BQ-5889-01A-11R-1591-13	122.216	Tumor
TCGA-B0-5108-01A-01R-1419-13	81.1545	Tumor
TCGA-CJ-5676-01A-11R-1540-13	124.165	Tumor
TCGA-B0-5109-01A-02R-1419-13	35.3171	Tumor
TCGA-GK-A6C7-01A-11R-A33A-13	63.6977	Tumor
TCGA-B8-4621-01A-01R-1502-13	15.5945	Tumor
TCGA-CZ-4861-01A-01R-1304-13	31.4046	Tumor
TCGA-B0-4817-01A-01R-1276-13	135.092	Tumor
TCGA-A4-8310-01A-11R-2401-13	7.56625	Tumor
TCGA-CJ-4871-01A-01R-1304-13	91.2711	Tumor
TCGA-DV-5576-01A-01R-1540-13	28.1401	Tumor
TCGA-CJ-5678-01A-11R-1540-13	16.4206	Tumor
TCGA-B0-4849-01A-01R-1276-13	48.4427	Tumor
TCGA-A3-3363-01A-01T-0860-13	6.92588	Tumor
TCGA-A3-A8OU-01A-11R-A37P-13	97.8592	Tumor
TCGA-BP-4801-01A-02R-1419-13	51.8139	Tumor
TCGA-B0-4815-01A-01R-1502-13	111.853	Tumor
TCGA-A4-7286-01A-11R-2138-13	13.2564	Tumor
TCGA-B0-5117-01A-01R-1419-13	14.2036	Tumor
TCGA-A3-3319-01A-02R-1324-13	202.138	Tumor
TCGA-CJ-4640-01A-01R-1187-13	53.9832	Tumor
TCGA-DV-5566-01A-01R-1540-13	50.5071	Tumor
TCGA-G6-A8L7-01A-11R-A37P-13	98.7022	Tumor
TCGA-B9-4116-01A-02R-1350-13	5.16819	Tumor
TCGA-2Z-A9JO-01A-11R-A42U-13	36.866	Tumor
TCGA-CJ-4888-01A-01R-1762-13	21.1337	Tumor
TCGA-B0-5703-01A-11R-1540-13	27.1002	Tumor
TCGA-CZ-5989-01A-11R-1671-13	61.745	Tumor
TCGA-MH-A854-01A-11R-A359-13	15.4788	Tumor
TCGA-A3-3324-01A-01T-0860-13	51.6239	Tumor
TCGA-CZ-5468-01A-01R-1502-13	118.948	Tumor
TCGA-BQ-5878-01A-11R-1591-13	46.5391	Tumor
TCGA-BQ-5890-01A-11R-1591-13	34.1108	Tumor
TCGA-BP-4177-01A-02R-1419-13	20.6102	Tumor
TCGA-Y8-A8RY-01A-11R-A37G-13	16.4598	Tumor
TCGA-CJ-6031-01A-11R-1671-13	21.9179	Tumor
TCGA-EU-5905-01A-11R-1671-13	55.1711	Tumor
TCGA-B8-5549-01A-01R-1540-13	26.9634	Tumor
TCGA-5P-A9K3-01A-11R-A42U-13	11.6793	Tumor
TCGA-A3-3331-01A-01T-0860-13	70.355	Tumor
TCGA-CJ-4889-01A-01R-1304-13	42.7285	Tumor
TCGA-BP-4166-01A-02R-1288-13	57.7325	Tumor
TCGA-B0-4710-01A-01R-1502-13	56.8117	Tumor
TCGA-A3-3362-01A-02R-1324-13	48.6485	Tumor
TCGA-B0-5698-01A-11R-1671-13	43.4206	Tumor
TCGA-BP-4969-01A-01R-1762-13	65.659	Tumor
TCGA-B9-A8YI-01A-21R-A37G-13	18.5323	Tumor
TCGA-CJ-4894-01A-01R-1304-13	56.5137	Tumor
TCGA-CZ-5459-01A-01R-1502-13	112.179	Tumor
TCGA-B1-A656-01A-11R-A31S-13	56.7276	Tumor
TCGA-CW-5580-01A-01R-1671-13	36.5576	Tumor
TCGA-B9-5156-01A-01R-1591-13	13.4322	Tumor
TCGA-BP-4164-01A-02R-1324-13	35.2692	Tumor
TCGA-A3-3376-01A-02R-1419-13	50.0721	Tumor
TCGA-B0-4713-01A-01R-1276-13	192.214	Tumor
TCGA-EU-5907-01A-11R-1671-13	13.6935	Tumor
TCGA-A4-7583-01A-11R-2138-13	4.30315	Tumor
TCGA-A4-A5Y0-01A-11R-A31S-13	60.6656	Tumor
TCGA-A3-3317-01A-02R-1324-13	53.1419	Tumor
TCGA-B0-5701-01A-11R-1540-13	92.6578	Tumor
TCGA-BP-5180-01A-01R-1425-13	104.142	Tumor
TCGA-B0-4837-01A-01R-1304-13	51.2582	Tumor
TCGA-B0-5116-01A-02R-1419-13	151.047	Tumor
TCGA-MH-A561-01A-11R-A26Y-13	7.87546	Tumor
TCGA-BP-4756-01A-01R-1288-13	7.56272	Tumor
TCGA-AK-3429-01A-02R-1324-13	29.0844	Tumor
TCGA-A3-A6NL-01A-11R-A33A-13	62.8633	Tumor
TCGA-CW-5581-01A-02R-1540-13	44.6789	Tumor
TCGA-B0-5710-01A-11R-1671-13	106.654	Tumor
TCGA-5P-A9JW-01A-11R-A42U-13	16.6382	Tumor
TCGA-B0-5692-01A-11R-1540-13	28.7777	Tumor
TCGA-Y8-A897-01A-11R-A36A-13	14.0782	Tumor
TCGA-F9-A7VF-01A-11R-A342-13	4.64604	Tumor
TCGA-G6-A8L6-01A-11R-A37P-13	126.062	Tumor
TCGA-B0-4847-01A-01R-1276-13	13.3395	Tumor
TCGA-BQ-5887-01A-11R-1964-13	45.9814	Tumor
TCGA-A3-3331-01A-02R-1324-13	44.1768	Tumor
TCGA-BP-5189-01A-02R-1425-13	118.585	Tumor
TCGA-CW-6090-01A-11R-1671-13	59.6466	Tumor
TCGA-A3-3373-01A-02R-1419-13	49.9062	Tumor
TCGA-BP-4991-01A-01R-1333-13	41.3728	Tumor
TCGA-BQ-5876-01A-11R-1591-13	15.6122	Tumor
TCGA-HE-7129-01A-11R-1964-13	1.93101	Tumor
TCGA-A3-3316-01A-01T-0860-13	130.85	Tumor
TCGA-BP-5001-01A-01R-1333-13	45.6918	Tumor
TCGA-B0-4706-01A-01R-1502-13	122.11	Tumor
TCGA-B0-4693-01A-01R-1276-13	29.8961	Tumor
TCGA-BP-4351-01A-01R-1288-13	50.7623	Tumor
TCGA-CJ-4870-01A-01R-1762-13	101.88	Tumor
TCGA-DV-5573-01A-01R-1540-13	26.3671	Tumor
TCGA-BQ-7053-01A-11R-1964-13	16.8506	Tumor
TCGA-BP-4972-01A-01R-1333-13	133.459	Tumor
TCGA-HE-7128-01A-11R-1964-13	10.2512	Tumor
TCGA-BP-5184-01A-01R-1425-13	104.917	Tumor
TCGA-5P-A9K8-01A-11R-A42U-13	17.7936	Tumor
TCGA-BP-4165-01A-02R-1288-13	115.889	Tumor
