# Supplementary material for: Sunitinib-suppressed miR-452-5p facilitates renal cancer cell invasion and metastasis through modulating SMAD4/SMAD7 signals
Source: Mol Cancer. 2018 Nov 12;17:157. doi: 10.1186/s12943-018-0906-x (PMC6231268; doi:10.1186/s12943-018-0906-x)
Supplement: Supplementary file 6 — Table S6. Univariate and Multivariate Cox Regression Analyses of miR-452-5p. (XLSX 10 kb) [file 12943_2018_906_MOESM6_ESM.xlsx]

## Sheet: Sheet1
Table S6. Univariate and Multivariate Cox Regression Analyses of miR-452-5p
Expression Levels and Overall Cancer Survival in Subjects with RCC.
	Univariate Analysis		Multivariate Analysis
	HR (95% CI)	P Value	HR (95% CI)	P Value
miR-452-5p expression		0.018*		0.020*
low	1.0 (Reference)		1.0 (Reference)
high	1.56(1.08-2.25)		1.58(1.07-2.31)
Tumor size		0.132		0.611
<4cm	1.0 (Reference)		1.0 (Reference)
≥4cm	1.09(0.56-1.25)		0.92(0.67-1.46)
T Stage		0.121		0.581
I-II	1.0 (Reference)		1.0 (Reference)
III-IV	1.66(1.45-2.36)		1.14(0.72-1.81)
Age		0.847		0.943
<60	1.0 (Reference)		1.0 (Reference)
≥60	1.20(0.83-1.44)		1.02(0.66-1.56)
Sex		0.691		0.995
Women	1.0 (Reference)		1.0 (Reference)
Men	0.88(0.48-1.62)		1.00(0.65-1.55)
Metastasis		0.036*		0.081
No	1.0 (Reference)		1.0 (Reference)
Yes	1.64(1.25-1.86)		1.14(0.88-2.20)
Furhman		0.09		0.682
I-II	1.0 (Reference)		1.0 (Reference)
III-IV	0.45(0.18-1.14)		0.71(0.49-1.97)
Abbreviations: CI, confidence interval; HR, hazard ratio.
*Statistically significant (p < 0.05)
p value from Cox regression analyses.
