# Supplementary material for: Sunitinib-suppressed miR-452-5p facilitates renal cancer cell invasion and metastasis through modulating SMAD4/SMAD7 signals
Source: Mol Cancer. 2018 Nov 12;17:157. doi: 10.1186/s12943-018-0906-x (PMC6231268; doi:10.1186/s12943-018-0906-x)
Supplement: Supplementary file 7 — Table S7. miR-532-5p expression and paitients’ survival time from TCGA RCC dataset. (XLS 114 kb) [file 12943_2018_906_MOESM7_ESM.xls]

## Sheet: Sheet1
Table S7. miR-532-5p expression and paitients' survival time from RCC TCGA dataset
id	futime	fustat	hsa-miR-452-5p
TCGA-A3-3382	1.5726	0	38.2215
TCGA-UZ-A9PM	10.4411	0	7.72406
TCGA-DV-A4VZ	1	0	32.7016
TCGA-CZ-5454	1.97808	1	115.938
TCGA-BP-5168	4.00822	1	5.27008
TCGA-CJ-5671	10.9233	0	104.158
TCGA-G7-A8LE	6.72055	0	18.9473
TCGA-5P-A9KH	5.61918	0	9.14184
TCGA-AL-3473	5.22192	0	75.8945
TCGA-EU-5905	0.326027	0	55.1711
TCGA-A4-A48D	1.03836	0	4.281
TCGA-HE-A5NH	2.16712	0	1.27883
TCGA-CZ-5456	6.63562	0	115.401
TCGA-B9-A5W8	1.43562	0	7.9407
TCGA-CJ-4897	9.15342	0	59.8419
TCGA-B0-4694	0.290411	1	50.1543
TCGA-B8-5158	3.33699	0	96.2593
TCGA-BP-4962	4.89041	0	70.6968
TCGA-CW-5589	6.51507	0	76.1337
TCGA-G6-A8L7	5.84384	0	98.7022
TCGA-B0-4844	0.857534	1	20.1761
TCGA-PJ-A5Z9	1.47945	0	10.1115
TCGA-Y8-A895	1.32603	0	13.8955
TCGA-BP-4993	0.484932	0	87.2656
TCGA-AK-3465	1.01096	0	24.9598
TCGA-A4-A5DU	1.3589	0	4.75605
TCGA-CZ-5461	0.90411	1	41.4238
TCGA-CJ-6033	0.613699	1	33.423
TCGA-CZ-5467	0.2	1	74.0444
TCGA-BP-4756	1.02466	0	7.56272
TCGA-A3-3347	4.41096	1	97.529
TCGA-A4-8518	1.64384	0	33.3836
TCGA-CZ-5459	4.61096	0	112.179
TCGA-BP-5186	1.89863	0	34.8947
TCGA-WN-A9G9	2.16712	0	170.666
TCGA-BP-4763	3.47945	1	101.976
TCGA-BQ-5887	2.11233	0	45.9814
TCGA-CZ-5468	0.161644	1	118.948
TCGA-CJ-4884	4.81918	0	18.8794
TCGA-BP-4995	3.75616	0	42.7391
TCGA-A3-3308	0.0438356	0	124.615
TCGA-CJ-4873	6.18904	0	60.1714
TCGA-B0-4700	5.42466	1	44.9087
TCGA-B0-5706	8.78082	0	14.0628
TCGA-B2-5639	2.74795	1	223.075
TCGA-B0-5099	1.32877	1	42.2722
TCGA-BP-4770	0.90137	1	39.1698
TCGA-B0-4696	2.3726	1	10.0819
TCGA-CZ-4862	8.96164	0	87.7382
TCGA-5P-A9KF	2.31507	0	6.66971
TCGA-CZ-4856	0.0493151	0	61.6777
TCGA-B0-4707	1.64384	1	82.534
TCGA-A3-3372	2.0137	0	130.467
TCGA-AK-3444	4.03014	0	23.4553
TCGA-B1-A655	1.39726	0	8.84675
TCGA-A3-3373	4.4411	0	49.9062
TCGA-G6-A8L8	2.98904	1	155.744
TCGA-AK-3433	9.33973	0	9.1132
TCGA-B2-4098	0.139726	1	18.5175
TCGA-B0-4838	2.28493	1	66.2364
TCGA-SX-A71V	2.4	0	5.00706
TCGA-B0-4706	0.178082	1	122.11
TCGA-A3-A8CQ	0.00821918	0	68.4008
TCGA-BP-5185	3.10137	0	29.9822
TCGA-A3-3370	6.23014	0	30.8415
TCGA-AK-3450	4.87397	0	117.323
TCGA-B0-4699	0.30137	1	48.6465
TCGA-BQ-5881	3.98356	0	28.9447
TCGA-B9-4115	2.2	0	4.30587
TCGA-UZ-A9PJ	2.18356	1	1.82119
TCGA-BP-5189	2.25205	1	118.585
TCGA-CW-5588	5.52603	0	83.3474
TCGA-AK-3429	9.11781	0	29.0844
TCGA-BP-4961	5.30137	0	137.754
TCGA-2Z-A9JM	2.5589	0	23.7919
TCGA-A3-3387	1.69041	0	68.4165
TCGA-BP-4977	1.24384	0	145.066
TCGA-B0-4816	3.75616	1	83.6548
TCGA-B0-5117	4.40548	0	14.2036
TCGA-B8-5549	0.531507	0	26.9634
TCGA-2Z-A9JR	0.441096	0	4.49786
TCGA-B0-4836	3.39178	1	113.409
TCGA-B8-A8YJ	1.18082	0	60.4601
TCGA-J7-A8I2	0.841096	0	66.7924
TCGA-A4-A57E	0.706849	1	14.0293
TCGA-SX-A71R	3.99178	0	0.765969
TCGA-BP-5170	6.60822	0	85.8377
TCGA-KV-A6GD	1.53425	0	52.609
TCGA-AL-3472	5.5589	0	5.41454
TCGA-B0-5108	4.88219	0	81.1545
TCGA-BP-4804	3.99726	0	167.389
TCGA-B8-5546	1.38356	0	12.1086
TCGA-CJ-4905	4.09863	0	81.3173
TCGA-B4-5835	0.0438356	0	315.528
TCGA-CZ-5987	1.21918	1	116.896
TCGA-B0-4712	3.66301	1	61.2374
TCGA-CZ-5451	5.28493	0	36.5126
TCGA-AK-3427	9.81644	0	20.9753
TCGA-EV-5902	1.58356	0	2.27475
TCGA-B0-4810	1.30959	1	33.1209
TCGA-5P-A9K4	5.98356	0	92.2678
TCGA-DW-7838	2.03836	0	12.8663
TCGA-GL-A4EM	0.0876712	0	29.2945
TCGA-IZ-8195	1.85479	0	10.8001
TCGA-BP-4801	3.07945	0	51.8139
TCGA-UZ-A9PV	3.95616	0	0.974497
TCGA-BP-4803	0.558904	0	148.789
TCGA-B0-5709	10.8877	0	32.7465
TCGA-MM-A563	1.61918	0	59.8447
TCGA-BP-4169	1.92055	1	53.7118
TCGA-BP-4777	4.74247	0	131.114
TCGA-BP-4976	4.47123	0	41.2923
TCGA-B0-5121	4.06849	0	180.46
TCGA-2Z-A9JS	1.34795	1	4.10109
TCGA-DV-5574	5.52329	0	44.2611
TCGA-A4-8098	2.45479	0	11.5083
TCGA-BP-4176	5.35616	0	49.7696
TCGA-B0-4815	4.35068	1	111.853
TCGA-DV-5565	3.6411	0	142.878
TCGA-BP-5180	6.2	0	104.142
TCGA-MH-A561	2.30411	0	7.87546
TCGA-G7-A8LB	1.49863	0	1.44151
TCGA-BQ-7045	4.02192	1	20.7743
TCGA-BP-4975	3.92603	0	68.697
TCGA-CW-5584	0.449315	1	135.22
TCGA-A4-A5Y1	1.08219	1	80.7061
TCGA-5P-A9K8	3.5863	0	17.7936
TCGA-G7-A8LD	1.40822	1	37.1842
TCGA-B0-4701	0.652055	1	79.9518
TCGA-CW-5581	7.66849	0	44.6789
TCGA-CJ-4888	4.29315	1	21.1337
TCGA-BQ-5888	1.10411	0	75.3419
TCGA-B8-A54H	0.70137	0	41.46
TCGA-B0-4849	0.189041	1	48.4427
TCGA-B0-5697	7.20548	0	115.061
TCGA-CW-5585	7.14795	0	52.104
TCGA-BP-5177	0.80274	0	50.648
TCGA-CJ-6030	6.29863	1	53.5504
TCGA-EV-5901	2.84932	0	37.2128
TCGA-SX-A71W	2.94795	0	7.25821
TCGA-B8-4143	1.94247	1	25.5024
TCGA-BQ-5879	1.90959	1	184.613
TCGA-BP-4776	1.12603	0	108.884
TCGA-CJ-4886	5.34795	0	70.4369
TCGA-BP-4798	0.915068	1	74.5102
TCGA-2Z-A9J9	6.28493	0	37.1148
TCGA-AK-3445	6.55342	0	26.3731
TCGA-EU-5904	1.50959	0	101.891
TCGA-CZ-5457	7.54521	0	18.0479
TCGA-A3-3351	2.49315	0	41.2023
TCGA-DW-5560	4.07123	0	13.9006
TCGA-B0-5102	7.5726	1	33.7828
TCGA-BQ-5877	0.739726	1	122.682
TCGA-B0-5109	1.60822	1	35.3171
TCGA-DV-A4VX	4.45479	1	177.441
TCGA-HE-A5NF	7.07397	0	13.4335
TCGA-CJ-4640	9.53425	0	53.9832
TCGA-CJ-4893	2.05479	0	35.0064
TCGA-UZ-A9PO	5.23562	0	10.4223
TCGA-A3-A8OU	0	0	97.8592
TCGA-A3-3367	6.21918	0	104.629
TCGA-2Z-A9J7	0.380822	1	2.91741
TCGA-BP-4963	5.02466	0	26.8769
TCGA-UZ-A9PN	3.11233	1	71.7288
TCGA-BQ-7044	10.3014	0	4.43847
TCGA-B0-5710	6.65753	0	106.654
TCGA-B8-4621	2.1589	0	15.5945
TCGA-CZ-4864	7.75342	1	28.3172
TCGA-MH-A562	1.68767	0	2.58573
TCGA-B9-4114	2.34795	0	9.99409
TCGA-5P-A9JU	1.02192	0	59.8887
TCGA-B0-4813	0.0493151	1	27.9467
TCGA-2Z-A9J6	4.74247	0	14.891
TCGA-B0-4837	3.77534	1	51.2582
TCGA-BP-5009	2.99178	1	46.4379
TCGA-DW-7837	3.12877	0	5.62678
TCGA-DV-5576	1.99178	1	28.1401
TCGA-B3-4103	2.54795	0	9.97695
TCGA-G7-7502	2.15342	0	18.5283
TCGA-B1-A654	1.68767	0	25.7002
TCGA-A3-A8OX	0	0	69.5333
TCGA-B0-5081	0.991781	1	108.177
TCGA-F9-A7Q0	1.09041	0	11.3182
TCGA-CJ-4878	5.98904	0	43.7086
TCGA-A4-7828	0.652055	0	39.0054
TCGA-B0-5703	6.15342	0	27.1002
TCGA-B4-5844	0.0191781	0	75.8029
TCGA-BP-4970	1.1863	0	40.6388
TCGA-CJ-6031	5.22192	0	21.9179
TCGA-2Z-A9JN	2.0274	0	22.6379
TCGA-A3-3322	4.04932	0	27.0342
TCGA-BP-5169	0.528767	0	13.9338
TCGA-B0-5701	6.74247	0	92.6578
TCGA-J7-6720	1.06301	0	27.7479
TCGA-B9-4116	1.71781	0	5.16819
TCGA-BP-5184	3.10411	0	104.917
TCGA-BP-4346	4.09041	1	14.1901
TCGA-CZ-5458	7.6411	0	29.1375
TCGA-B0-5712	7.45753	0	29.8035
TCGA-B0-5083	2.86301	1	21.8778
TCGA-2Z-A9JD	2.90411	0	18.6679
TCGA-BQ-5883	3.40274	0	20.4727
TCGA-5P-A9KE	2.25753	0	3.80321
TCGA-UZ-A9Q0	9.2274	0	1.15427
TCGA-AK-3440	7.84932	0	12.5624
TCGA-G6-A5PC	0.663014	1	53.9591
TCGA-B8-A54D	2.27397	0	23.5388
TCGA-2Z-A9JK	3.24932	0	97.689
TCGA-IZ-A6M8	1.36164	0	6.62592
TCGA-CZ-5464	5.83014	0	118.583
TCGA-G7-6797	2.09589	0	2.93263
TCGA-B0-4827	2.42466	1	138.038
TCGA-EV-5903	2.07397	0	48.9546
TCGA-J7-8537	0.879452	1	24.7041
TCGA-Y8-A896	1.55342	0	10.6933
TCGA-BP-4790	3.04384	1	82.0355
TCGA-CJ-4641	4.55068	1	30.3326
TCGA-B0-4690	0.117808	1	36.1969
TCGA-IA-A83V	8.05753	1	38.0957
TCGA-Y8-A897	1.50411	0	14.0782
TCGA-P4-A5EA	0.550685	1	54.8654
TCGA-B8-A54J	1.44658	0	51.3285
TCGA-A3-3363	0.873973	0	6.92588
TCGA-B8-4154	3.78082	0	30.9942
TCGA-A3-3358	3.58082	0	89.8235
TCGA-BQ-5885	2.52329	0	173.155
TCGA-BP-4353	1.0274	1	115.905
TCGA-BQ-7053	4.15342	0	16.8506
TCGA-BP-4771	0.443836	1	83.0449
TCGA-BP-5194	1.11781	0	44.6715
TCGA-B4-5836	0.386301	0	40.3377
TCGA-B0-4852	3.07123	1	62.1707
TCGA-BP-4341	4.35342	1	106.351
TCGA-CJ-4871	6.63836	0	91.2711
TCGA-B2-5641	1.79726	0	36.1512
TCGA-B9-A44B	0.989041	0	153.554
TCGA-BQ-5893	0.660274	1	69.5271
TCGA-DW-7841	1.21918	0	6.69926
TCGA-B8-4620	2.12877	0	102.76
TCGA-CJ-4885	9.45479	0	45.8691
TCGA-A3-A6NN	0.00821918	0	51.8907
TCGA-CW-6093	8.61918	0	43.4426
TCGA-G7-6792	7.57534	0	8.96321
TCGA-AK-3428	10.2137	0	65.0424
TCGA-2Z-A9JP	2.44658	0	8.01852
TCGA-T7-A92I	0.975342	0	21.2307
TCGA-CJ-4912	4.53973	0	115.203
TCGA-P4-A5EB	8.26027	0	34.5629
TCGA-B0-4839	4.49041	1	29.4661
TCGA-2Z-A9JI	4.29315	0	85.0242
TCGA-B0-4698	0.115068	1	54.4508
TCGA-MW-A4EC	1.36438	0	43.7831
TCGA-AK-3458	3.2	0	57.8786
TCGA-B0-4819	0.50137	1	59.8684
TCGA-CJ-5682	10.2356	0	185.193
TCGA-MH-A560	2.53151	0	19.3744
TCGA-B8-A54F	1.42192	0	30.2198
TCGA-B2-5633	2.63836	0	50.4556
TCGA-BP-4968	4.78356	0	29.3415
TCGA-B3-4104	2.87397	0	14.3244
TCGA-B0-5119	4.25205	0	70.3699
TCGA-P4-A5E6	8.31507	0	15.8748
TCGA-5P-A9K9	1.6137	1	68.2361
TCGA-B0-5120	3.20274	0	100.136
TCGA-AK-3431	6.13973	1	54.1487
TCGA-BQ-7049	3.73699	1	54.8166
TCGA-CJ-5686	5.58356	0	39.1072
TCGA-BP-4967	0.561644	0	44.6078
TCGA-A4-A5XZ	1.31233	0	11.6701
TCGA-CJ-6032	9.96986	0	44.6643
TCGA-SX-A7SN	1.58356	0	2.93744
TCGA-BP-5202	0.0794521	0	83.562
TCGA-B8-A54E	2.49041	0	24.1957
TCGA-BP-4165	8.32055	0	115.889
TCGA-BP-4992	1.3726	0	27.2445
TCGA-B0-5696	7.14795	0	70.9323
TCGA-GL-8500	2.30411	0	4.24656
TCGA-B9-7268	1.83836	0	1.54652
TCGA-B0-4693	0.210959	1	29.8961
TCGA-A4-7585	2.93151	1	32.534
TCGA-B1-A656	1.69315	0	56.7276
TCGA-B9-5156	3.66575	0	13.4322
TCGA-B0-4823	1.24384	1	37.0918
TCGA-B9-A8YI	1.02466	0	18.5323
TCGA-BP-4174	5.14795	0	37.3829
TCGA-SX-A7SR	2.20548	0	3.08273
TCGA-DV-5573	3.09589	0	26.3671
TCGA-WN-AB4C	3.25479	0	31.4305
TCGA-BP-5178	5.23836	1	92.9656
TCGA-B8-4622	4.17808	0	206.646
TCGA-B2-4101	1.77534	0	94.2942
TCGA-5P-A9K0	1.85479	0	4.85856
TCGA-BP-5199	3.71233	0	28.6187
TCGA-CJ-4900	4.69589	1	29.8977
TCGA-B0-4691	0.380822	1	21.7632
TCGA-AK-3456	3.13151	0	6.63122
TCGA-CJ-4636	5.27123	0	20.4023
TCGA-A3-3380	1.55342	0	133.466
TCGA-SX-A7SO	3.44384	0	6.29834
TCGA-IA-A40Y	0.169863	0	69.4638
TCGA-CZ-5982	6.68219	0	77.9824
TCGA-BP-4167	7.44658	0	53.5474
TCGA-CW-6088	8.8274	0	79.779
TCGA-CJ-4908	4.19452	0	80.8721
TCGA-BP-4343	5.23836	1	143.165
TCGA-B0-4845	5.4411	1	36.3182
TCGA-B8-4619	1.43288	0	24.295
TCGA-AT-A5NU	0.183562	0	3.64188
TCGA-BP-4807	0.578082	0	29.0833
TCGA-B9-4117	0.0383562	0	17.9668
TCGA-BQ-5891	0.0794521	0	167.172
TCGA-A4-8310	2.13699	0	7.56625
TCGA-GL-A9DD	0.934247	0	18.5415
TCGA-AK-3447	3.33425	0	20.9327
TCGA-CJ-6028	4.45205	1	124.347
TCGA-A4-8516	0.0630137	0	2.62915
TCGA-BQ-7058	0.939726	1	21.6655
TCGA-BP-4335	1.30137	1	127.265
TCGA-CZ-5986	1.02192	0	35.8343
TCGA-EU-5906	0.564384	0	42.72
TCGA-B0-5713	7.62192	0	46.4537
TCGA-GL-A59T	1.49589	0	10.317
TCGA-CZ-4863	5.28219	0	19.7586
TCGA-CJ-4892	4.16712	0	43.052
TCGA-UZ-A9PK	9.78356	0	21.5891
TCGA-BP-4344	4.56438	0	91.7983
TCGA-BP-4972	4.11507	0	133.459
TCGA-Y8-A8RY	2.10685	0	16.4598
TCGA-BP-4769	5.13973	0	37.8675
TCGA-AK-3434	5.71781	0	87.0008
TCGA-CJ-4637	6.10137	1	42.5864
TCGA-BQ-5876	1.60548	0	15.6122
TCGA-B8-A54K	1.28493	0	28.8237
TCGA-B8-5162	0.0986301	0	39.1828
TCGA-CJ-5679	1.86027	1	237.893
TCGA-5P-A9JY	4.13151	1	1.32502
TCGA-B0-4842	4.72329	1	28.8472
TCGA-CJ-4882	5.1589	0	58.4926
TCGA-B0-5698	9.94795	0	43.4206
TCGA-A4-A772	0	0	14.1659
TCGA-BQ-7051	4.2	0	3.08948
TCGA-SX-A7SU	3.64658	0	15.8598
TCGA-AK-3430	1.31507	1	200.281
TCGA-GL-7966	0.306849	0	56.3133
TCGA-5P-A9KC	1.03288	0	18.3189
TCGA-A3-3376	4.64658	1	50.0721
TCGA-BP-4342	6.18082	1	58.738
TCGA-BP-5196	2.78904	0	32.0021
TCGA-AK-3425	9.1589	0	141.154
TCGA-AK-3453	6.93425	0	9.17015
TCGA-UN-AAZ9	1.50137	0	11.7112
TCGA-BP-5173	0.169863	1	25.9314
TCGA-BP-4775	5.04932	0	42.8023
TCGA-CJ-4899	4.1863	0	33.1089
TCGA-AS-3777	3.39178	0	16.5098
TCGA-CJ-4891	2.24384	1	9.49064
TCGA-A4-7997	2.53973	0	33.6718
TCGA-B0-4843	0.876712	1	96.21
TCGA-UZ-A9PZ	1.8	0	11.4047
TCGA-DW-7963	3.39726	0	6.74753
TCGA-B1-5398	3.4274	0	20.2822
TCGA-B9-A8YH	1.45753	0	8.93267
TCGA-5P-A9K3	1.29041	1	11.6793
TCGA-BP-5191	2.64932	0	101.408
TCGA-4A-A93W	0.0109589	0	15.1585
TCGA-AL-3467	5.84932	0	2.24369
TCGA-A4-A5Y0	0.690411	0	60.6656
TCGA-CZ-4859	4.89589	0	30.2455
TCGA-CJ-4916	3.76164	0	112.002
TCGA-CJ-4920	0.380822	1	74.2427
TCGA-B0-5702	5.95068	0	81.5537
TCGA-A3-3365	2.39178	0	61.3821
TCGA-DW-7840	0.312329	0	4.47246
TCGA-5P-A9JV	5.59726	0	116.713
TCGA-B8-5551	0.0438356	0	98.5101
TCGA-A4-8515	1.94247	0	2.27934
TCGA-B8-5545	4.17808	0	47.8014
TCGA-B0-4846	3.28767	1	122.023
TCGA-B0-5075	1.74521	1	11.2349
TCGA-B8-4146	1.4	0	156.95
TCGA-B0-5690	9.29315	0	93.8492
TCGA-B0-5116	3.49041	0	151.047
TCGA-BP-4991	3.87123	0	41.3728
TCGA-CZ-4866	8.95068	0	29.899
TCGA-B8-A54I	0.410959	0	57.2955
TCGA-5P-A9KA	1.08219	0	39.5421
TCGA-BP-4340	1.53973	1	31.897
TCGA-CJ-4901	3.9726	0	104.959
TCGA-PJ-A8JU	1.0411	0	14.9609
TCGA-CZ-5469	2.59178	1	41.6922
TCGA-BQ-5884	2.16986	0	16.7396
TCGA-BP-5195	2.05205	0	86.5968
TCGA-A4-7583	0.00821918	0	4.30315
TCGA-AL-A5DJ	4.10411	1	15.0732
TCGA-DZ-6135	6.21644	0	13.429
TCGA-BP-4983	3.87123	0	304.86
TCGA-A3-A6NI	2.78904	0	107.024
TCGA-CW-6087	0.112329	1	57.1912
TCGA-A3-3311	3.26301	1	115.213
TCGA-2K-A9WE	0.586301	0	15.9524
TCGA-BP-5010	2.40548	1	31.6324
TCGA-BP-4334	1.76712	1	8.29543
TCGA-MH-A857	2.43836	0	10.8479
TCGA-G7-6795	3.27123	0	12.2486
TCGA-F9-A4JJ	0.890411	1	76.2964
TCGA-5P-A9K2	6.55342	0	3.86766
TCGA-CZ-5984	5.66301	0	89.0895
TCGA-MM-A564	1.66301	0	174.545
TCGA-BP-4965	5.12603	0	85.3902
TCGA-B4-5843	0.030137	0	91.617
TCGA-BP-4761	0.49863	0	44.9892
TCGA-B8-5164	0.0712329	0	21.3727
TCGA-B3-8121	1.03836	0	8.85758
TCGA-A3-3323	3.03014	0	86.8743
TCGA-A3-3317	4.08493	0	53.1419
TCGA-CJ-4642	8.78082	0	34.3687
TCGA-B0-5695	5.89041	0	53.4797
TCGA-SX-A7SP	1.3589	1	22.1281
TCGA-GL-A9DE	1.3589	0	30.4465
TCGA-A4-8517	1.63562	0	2.93769
TCGA-A3-3357	7.36438	0	13.1799
TCGA-BP-4799	3.10411	1	189.165
TCGA-BQ-5882	1.80274	1	91.2176
TCGA-A3-3307	3.93425	0	49.042
TCGA-BP-4177	4.57534	0	20.6102
TCGA-B8-4148	4.16438	0	25.8581
TCGA-G7-6796	5.95342	0	40.2169
TCGA-B0-5097	1.82192	0	109.092
TCGA-AK-3451	7.85753	0	22.3209
TCGA-P4-A5E8	3.57808	1	78.8747
TCGA-BP-5198	1.65205	0	90.452
TCGA-CJ-4872	0.893151	0	92.6753
TCGA-BQ-7062	0.317808	0	11.5541
TCGA-BP-4355	2.61096	1	96.0479
TCGA-BP-4332	3.10411	0	39.7115
TCGA-B1-A657	1.75616	0	14.9824
TCGA-BQ-7061	0.59726	0	43.5753
TCGA-B0-4714	0.271233	1	36.1584
TCGA-B0-5402	3.53425	0	170.674
TCGA-CZ-5465	7.02466	1	123.279
TCGA-A3-3362	4.27123	0	48.6485
TCGA-F9-A7VF	0.2	0	4.64604
TCGA-A4-7734	0.0739726	0	21.7162
TCGA-A3-3385	5.46027	0	23.1693
TCGA-DV-5567	5.49041	0	18.9882
TCGA-B0-5699	10.5233	0	34.5826
TCGA-CZ-5452	4.90137	0	224.466
TCGA-G7-6789	0.334247	1	103.657
TCGA-CZ-5988	1.89863	0	120.051
TCGA-AK-3454	2.39452	0	64.1961
TCGA-UZ-A9Q1	4.27945	0	4.99372
TCGA-A3-3326	3.11507	0	101.624
TCGA-BP-4998	2.55342	0	83.8356
TCGA-IA-A83W	5.59726	1	59.1571
TCGA-B0-5694	1.31507	1	158.938
TCGA-DV-5568	1.0137	0	32.6888
TCGA-CJ-4895	3.28767	1	23.1979
TCGA-CJ-4923	1.56712	1	58.9029
TCGA-BP-5183	3.53699	0	187.434
TCGA-BP-4331	6.72329	1	63.6327
TCGA-CJ-4894	2.30411	1	56.5137
TCGA-BP-4765	5.98356	0	41.9267
TCGA-BP-4985	2.60822	1	203.482
TCGA-CJ-5684	6.11233	0	134.126
TCGA-A4-A7UZ	0	0	9.71783
TCGA-B0-5107	2.53973	1	1.83116
TCGA-B0-4824	4.53973	1	18.3704
TCGA-2Z-A9JG	4.55342	0	15.2695
TCGA-A3-3378	1.72603	0	101.413
TCGA-CJ-4881	5.51781	0	230.621
TCGA-CJ-4635	3.87945	0	18.227
TCGA-BP-4960	5.95068	0	260.939
TCGA-G7-A8LC	1.92329	0	14.3141
TCGA-BP-4351	2.65753	0	50.7623
TCGA-CW-5583	6.81918	0	46.9007
TCGA-AK-3436	9.12603	0	53.5883
TCGA-BP-4959	7.28767	0	111.94
TCGA-BP-4973	3.79178	0	124.205
TCGA-CZ-5453	6.6274	1	33.4078
TCGA-BP-4760	6.46849	0	30.8824
TCGA-CJ-4634	9.58356	0	73.7712
TCGA-A3-3346	0.375342	1	159.363
TCGA-BP-5174	6.18356	0	145.044
TCGA-B4-5377	1	0	47.9516
TCGA-B0-5812	10.5041	0	69.9
TCGA-2Z-A9J5	8.35616	0	15.1751
TCGA-BQ-5890	0.638356	0	34.1108
TCGA-IZ-A6M9	1.03014	0	2.30118
TCGA-CJ-4918	0.254795	1	66.6136
TCGA-5P-A9K6	5.24384	0	15.6175
TCGA-B0-5080	0.936986	1	64.8818
TCGA-BQ-7050	5.10685	0	5.74317
TCGA-B1-7332	3.12603	0	6.50428
TCGA-B9-A5W9	0.0136986	0	12.8428
TCGA-BQ-7046	8.07671	0	9.32561
TCGA-BP-5004	3.08493	0	55.0752
TCGA-B0-5399	3.86575	0	51.6964
TCGA-4A-A93X	1.06849	0	14.1336
TCGA-CZ-5455	1.53699	1	91.481
TCGA-B0-4828	0.841096	1	21.329
TCGA-CJ-5683	5.17534	0	101.089
TCGA-PJ-A5Z8	1.64384	0	30.2535
TCGA-A3-3383	2.3589	0	151.331
TCGA-KV-A74V	0.950685	0	19.9739
TCGA-BP-4164	2.71781	1	35.2693
TCGA-BP-4327	0.29863	1	82.0019
TCGA-BQ-7059	0.635616	0	24.9449
TCGA-A4-7915	0.0191781	0	170.575
TCGA-G7-6790	4.31507	0	17.8423
TCGA-CJ-4887	2.55342	1	32.6119
TCGA-B9-A5W7	1.60274	0	3.80157
TCGA-BP-5008	2.93425	0	44.8618
TCGA-CJ-4870	4.10411	0	101.88
TCGA-BP-4159	7.12603	1	116.136
TCGA-BP-4988	2.26849	1	89.2633
TCGA-B0-5705	12.4301	0	29.4695
TCGA-GL-A9DC	1.07397	0	42.0915
TCGA-BP-4163	7.77808	0	82.3122
TCGA-CZ-5989	5.21918	0	61.745
TCGA-BP-5201	2.60548	0	66.8631
TCGA-B0-4834	5.72603	1	34.3285
TCGA-BP-4162	8.42192	0	35.8223
TCGA-A3-3374	3.6	0	4.79977
TCGA-BP-4173	5.1863	0	31.9935
TCGA-BP-4781	5.69863	0	42.0472
TCGA-BP-4352	0.942466	1	17.2801
TCGA-BP-4981	3.00548	1	250.27
TCGA-CJ-4876	5.35616	0	22.0641
TCGA-AK-3461	6.07397	0	37.9826
TCGA-A3-3320	4.13151	0	43.3722
TCGA-B0-4718	4.87123	0	41.3072
TCGA-A4-7584	1.78082	0	5.08492
TCGA-GL-7773	1.07671	0	9.49937
TCGA-SX-A7SS	4.42466	0	15.7029
TCGA-CJ-4907	4.10685	0	88.9158
TCGA-BP-4787	1.31507	1	85.4761
TCGA-DV-5575	4.73699	0	42.3607
TCGA-BP-4338	7.83288	0	114.739
TCGA-A3-A6NJ	1.28219	0	37.6067
TCGA-AL-3471	4.10959	1	4.26189
TCGA-A4-7286	1.51781	0	13.2564
TCGA-B0-4814	0.460274	1	33.9952
TCGA-B0-4811	3.88219	1	31.5301
TCGA-IA-A83S	7.14795	1	14.7258
TCGA-Y8-A898	1.30137	0	14.1752
TCGA-BP-4347	3.74521	0	34.8018
TCGA-B8-5552	2.86575	0	41.1897
TCGA-BP-4329	2.31507	1	56.1712
TCGA-CZ-4860	0.564384	1	32.1433
TCGA-A4-A6HP	1.03836	0	4.51225
TCGA-B0-4833	6.53699	1	32.7111
TCGA-B9-A69E	1.23836	0	45.702
TCGA-A4-A4ZT	1.4137	0	10.5974
TCGA-B0-5693	11.1616	0	106.814
TCGA-BP-5007	3.12329	0	198.305
TCGA-CZ-4858	5.76712	1	10.3747
TCGA-B2-5635	2.06849	0	88.8779
TCGA-B0-5692	10.8055	0	28.7777
TCGA-CZ-4853	2.12055	0	92.6666
TCGA-B4-5832	0.424658	0	210.691
TCGA-BP-5190	2.76986	0	183.169
TCGA-B0-5691	9.4	0	39.4298
TCGA-A4-7996	1.3863	0	3.01757
TCGA-HE-A5NJ	4.72877	0	7.6383
TCGA-SX-A7SM	0.994521	1	149.47
TCGA-CW-5587	6.09863	0	78.6479
TCGA-IZ-8196	1.77808	0	9.40152
TCGA-CJ-4903	4.27123	0	28.1725
TCGA-B4-5834	0.0712329	0	82.2232
TCGA-B3-3925	2.81918	0	11.193
TCGA-BP-4789	4.07945	0	116.427
TCGA-IA-A40U	1.4	0	20.0896
TCGA-DW-5561	1.13425	0	16.2715
TCGA-BP-4326	4.45205	1	27.9614
TCGA-A4-7287	1.63562	1	425.439
TCGA-G7-7501	1.70959	1	10.1097
TCGA-B4-5838	0.454795	0	63.263
TCGA-BP-4762	3.67945	1	68.926
TCGA-BP-4782	0.969863	0	114.32
TCGA-B0-5094	0.912329	1	103.947
TCGA-BP-4759	6.49863	0	42.7472
TCGA-BP-4337	0.00547945	1	39.936
TCGA-AL-7173	5.64384	0	52.0532
TCGA-BQ-5892	0.99726	0	27.0123
TCGA-DW-7842	0.252055	0	2.24476
TCGA-IA-A83T	7.35342	1	10.8467
TCGA-CJ-4904	9.04658	0	73.6149
TCGA-CJ-4639	8.84658	0	57.522
TCGA-UZ-A9PL	8.63562	0	17.6871
TCGA-BQ-7048	7.77808	0	28.6313
TCGA-DZ-6132	6.73973	0	25.8069
TCGA-EU-5907	0.347945	0	13.6935
TCGA-DV-5566	3.83014	0	50.5071
TCGA-CJ-5681	1.51233	1	26.6717
TCGA-B0-5104	7.53973	1	171.315
TCGA-A3-A6NL	1.88767	0	62.8633
TCGA-BQ-7056	1.67671	0	81.6517
TCGA-BQ-5878	5.30959	0	46.539
TCGA-B3-A6W5	0.846575	0	14.0296
TCGA-BP-4160	7.89315	0	91.2016
TCGA-CJ-5676	11.1425	0	124.165
TCGA-BP-5182	3.19178	0	83.1296
TCGA-B0-4713	0.553425	1	192.214
TCGA-HE-A5NI	0.986301	0	20.8091
TCGA-BP-4797	3.03288	0	27.4102
TCGA-B0-5084	0.608219	1	6.56473
TCGA-B0-5106	4.37808	1	81.4949
TCGA-SX-A71U	3.71781	0	6.95333
TCGA-CZ-5466	1.87671	0	154.907
TCGA-2Z-A9JO	2.6	0	36.866
TCGA-P4-AAVM	4.21644	0	11.759
TCGA-CJ-4889	5.33151	0	42.7285
TCGA-CZ-4854	3.84658	1	320.407
TCGA-2Z-A9J1	6.29589	0	16.17
TCGA-GK-A6C7	0.167123	0	63.6977
TCGA-2Z-A9J8	7.64384	0	25.1512
TCGA-B0-5092	1.25753	1	37.9159
TCGA-CZ-5985	5.47123	0	91.9387
TCGA-B1-A47N	3.0411	0	16.7059
TCGA-B0-5110	5.50411	0	84.2578
TCGA-BP-4974	0.578082	1	124.355
TCGA-BP-4987	3.07945	0	52.0557
TCGA-AK-3443	3.89863	0	11.0006
TCGA-B1-A47O	2.30685	0	36.2112
TCGA-CJ-4638	1.18082	1	22.9642
TCGA-A4-7288	5.08767	0	6.64057
TCGA-CZ-5463	1.8137	0	192.105
TCGA-BP-5200	2.91233	0	37.2946
TCGA-B8-4151	3.5589	0	131.983
TCGA-F9-A97G	0.0356164	0	44.5258
TCGA-2Z-A9JE	4.73425	0	1.7474
TCGA-UZ-A9PX	5.4274	0	5.58151
TCGA-BP-4158	9.25205	0	36.0179
TCGA-G7-6793	0.920548	1	37.95
TCGA-HE-A5NK	6.10411	0	23.3272
TCGA-B0-4818	1.39726	1	85.2621
TCGA-BP-4982	2.77808	0	191.091
TCGA-B0-4848	2.41918	1	86.6396
TCGA-A4-7732	1.59452	0	1.04893
TCGA-B8-5550	4.04384	0	47.1314
TCGA-Q2-A5QZ	1.1726	0	65.6558
TCGA-DW-7836	2.99452	0	12.0224
TCGA-BQ-5875	7.23014	0	29.4292
TCGA-B2-A4SR	1.38904	0	88.7932
TCGA-2Z-A9JJ	3.32329	0	43.5703
TCGA-CZ-4861	1.22192	1	31.4045
TCGA-AL-3468	6.3863	1	4.54215
TCGA-BP-4345	4.15342	0	81.8131
TCGA-B0-5095	0.671233	1	85.7563
TCGA-UZ-A9PR	7.19726	0	3.40216
TCGA-SX-A71S	4.12055	0	7.43849
TCGA-B9-4617	0.0958904	0	6.59556
TCGA-B3-3926	2.41918	0	4.15682
TCGA-DV-5569	0.972603	0	134.464
TCGA-BP-5192	1.95616	0	57.9112
TCGA-B2-5636	2.51781	0	30.7982
TCGA-CJ-4644	0.920548	1	31.077
TCGA-B0-5700	4.90411	0	42.4777
TCGA-BP-4768	1.09589	0	67.5019
TCGA-B0-4710	4.80822	0	56.8117
TCGA-A3-3349	3.79452	0	134.275
TCGA-SX-A7SL	2.25479	0	4.30691
TCGA-B0-5096	0.186301	1	52.0203
TCGA-UZ-A9PU	2.55616	1	1.61529
TCGA-HE-7129	6.8274	0	1.93101
TCGA-CJ-4869	6.99726	0	74.2652
TCGA-CW-6097	1.56438	1	45.4828
TCGA-BQ-5889	0.90137	1	122.216
TCGA-B0-4817	2.79178	1	135.092
TCGA-MH-A55Z	2.31507	0	3.18188
TCGA-A3-3313	2.0137	1	41.8867
TCGA-B0-5113	3.21918	0	42.9287
TCGA-BP-5000	1.54247	0	57.5983
TCGA-BP-4161	7.52329	0	165.759
TCGA-BP-4989	0.323288	0	35.136
TCGA-DZ-6131	6.65479	0	46.0613
TCGA-B9-4113	4.20822	1	3.18146
TCGA-V9-A7HT	2.64384	0	14.1477
TCGA-BQ-7060	0.586301	0	14.2793
TCGA-DW-7834	10.8219	0	24.8117
TCGA-6D-AA2E	0.991781	0	91.8326
TCGA-A4-8311	1.99726	0	20.7099
TCGA-B0-5100	5.2411	1	32.6409
TCGA-B8-4153	2.08767	0	141.12
TCGA-CJ-5678	1.5726	1	16.4206
TCGA-B0-5400	4.74795	0	53.0714
TCGA-UZ-A9PS	5.93699	0	5.29175
TCGA-BQ-5886	2.16986	0	25.8777
TCGA-B0-5085	2.10959	1	105.486
TCGA-B2-3923	2.71781	0	16.8258
TCGA-CJ-4643	4.91233	0	47.5007
TCGA-G7-A4TM	2.10411	0	13.2291
TCGA-BP-4330	5.1726	0	45.5807
TCGA-Y8-A8S1	1.10685	0	45.2765
TCGA-UZ-A9PP	8.24658	0	30.1678
TCGA-B8-5553	1.19178	0	99.0282
TCGA-BP-4986	2.15068	0	81.0357
TCGA-AK-3460	6.87123	0	49.3391
TCGA-BP-4994	3.58356	0	12.2222
TCGA-2Z-A9J2	4.91781	0	63.9992
TCGA-BP-4758	6.04932	0	42.5609
TCGA-B0-4847	2.1726	1	13.3395
TCGA-P4-A5E7	7.25753	0	21.0933
TCGA-B0-5707	10.2575	0	19.7082
TCGA-CJ-5675	10.7836	0	26.9607
TCGA-CW-5591	6.22192	0	194.302
TCGA-BQ-5880	3.6	1	77.5879
TCGA-P4-A5ED	7.71507	0	14.4995
TCGA-P4-AAVO	6.57534	0	10.0212
TCGA-P4-AAVK	4.35616	0	27.5476
TCGA-B0-5711	10.9288	0	137.239
TCGA-BQ-7055	2.18904	0	8.426
TCGA-B0-4688	0.276712	1	953.672
TCGA-CZ-5462	0.852055	1	146.483
TCGA-A3-A8OV	0.931507	0	90.9019
TCGA-A3-3316	4.09041	0	130.85
TCGA-4A-A93Y	0.964384	0	70.5253
TCGA-B4-5378	0.479452	0	27.3234
TCGA-B0-5098	4.33973	1	109.332
TCGA-CJ-5677	2.14247	1	110.133
TCGA-Y8-A8RZ	0.306849	0	21.0437
TCGA-P4-AAVL	1.33425	1	36.7809
TCGA-B0-4697	1.58356	1	35.155
TCGA-CJ-6027	9.90411	1	61.0126
TCGA-MH-A855	1.01096	0	17.8429
TCGA-A3-3319	3.09589	0	202.138
TCGA-B2-4102	2.60822	0	127.377
TCGA-BP-5181	4.09589	0	63.22
TCGA-BP-4354	2.83288	1	26.8473
TCGA-F9-A8NY	0.0986301	0	102.909
TCGA-BP-5001	3.22466	0	45.6918
TCGA-CZ-5470	1.05753	0	69.0244
TCGA-A3-3324	3.24932	0	51.6239
TCGA-IA-A40X	1.66575	0	7.89892
TCGA-GL-A59R	1.03562	0	7.35037
TCGA-AK-3455	1.87123	1	28.9405
TCGA-2Z-A9JQ	2.13151	0	13.4604
TCGA-O9-A75Z	1.29041	0	6.34218
TCGA-5P-A9JW	8.87945	0	16.6382
TCGA-CZ-5460	7.87123	0	27.0692
TCGA-B0-4821	3.36986	1	259.173
TCGA-HE-A5NL	2.10137	0	8.64272
TCGA-BQ-5894	0.230137	0	96.6846
TCGA-B0-4945	5.87671	1	69.1128
TCGA-2Z-A9J3	4.85205	1	3.82979
TCGA-A4-8312	1.93973	0	8.77399
TCGA-B2-3924	2.99178	0	23.4982
TCGA-B8-5163	2.25205	0	175.452
TCGA-BP-4795	1.69863	0	39.9571
TCGA-DZ-6133	4.26575	1	5.45993
TCGA-2Z-A9JT	1.87397	0	11.3848
TCGA-A4-8630	1.19452	0	4.10817
TCGA-B0-4841	0.558904	1	140.665
TCGA-B0-4703	0.49863	1	58.2723
TCGA-B8-A7U6	1.35616	0	89.1832
TCGA-GL-6846	16.2329	0	20.9847
TCGA-3Z-A93Z	1.05479	0	125.994
TCGA-BP-4971	4.07397	0	30.5453
TCGA-CJ-5689	4.43836	1	39.8526
TCGA-CJ-4875	9.73699	1	115.254
TCGA-CW-6090	6.99178	0	59.6466
TCGA-MH-A856	2.59452	0	17.6286
TCGA-DW-7839	1.14795	0	3.00021
TCGA-BP-4969	4.91507	0	65.659
TCGA-DZ-6134	5.08493	0	19.3106
TCGA-B8-5159	1.97808	0	27.4107
TCGA-B8-A54G	0.145205	0	20.2631
TCGA-BP-5175	2.55342	0	105.442
TCGA-MH-A55W	2.85753	0	5.09113
TCGA-5P-A9JZ	7.51781	0	4.6541
TCGA-BP-4766	4.00548	0	41.9508
TCGA-AL-3466	0.80274	1	40.2532
TCGA-HE-7130	4.84932	0	262.305
TCGA-CZ-4865	0.454795	1	176.503
TCGA-BP-4325	8.12055	0	32.3077
TCGA-CJ-4890	9.6411	0	71.5512
TCGA-2Z-A9JL	2.75616	0	13.5671
TCGA-AK-3426	2.42466	1	27.7115
TCGA-UZ-A9PQ	7.18904	1	27.4412
TCGA-MM-A84U	1.91781	0	176.974
TCGA-B8-5165	2.01918	0	58.1775
TCGA-B0-5088	1.54247	1	36.129
TCGA-CW-5590	2.94521	1	38.1224
TCGA-MH-A854	1.46849	0	15.4788
TCGA-A3-A8OW	0.884932	0	145.591
TCGA-KV-A6GE	2.42466	0	11.2169
TCGA-DV-A4W0	6.76712	0	68.1222
TCGA-A3-3331	4.06849	0	44.1768
TCGA-CJ-5680	2.10411	1	35.0397
TCGA-BP-4166	0.0356164	0	57.7325
TCGA-CJ-4902	4.16438	0	100.673
TCGA-BP-5176	4.35616	1	89.0351
TCGA-CJ-5672	6	1	116.432
TCGA-SX-A7SQ	3.46849	0	27.1682
TCGA-Y8-A8S0	0.50137	0	12.9915
TCGA-Y8-A894	1.55342	0	1.55158
TCGA-CZ-4857	3.92329	1	151.02
TCGA-B0-5077	3.60822	1	25.389
TCGA-B0-5115	4.39452	0	45.1087
TCGA-CW-5580	5.38082	1	36.5576
TCGA-B2-4099	2.66301	0	116.302
TCGA-B0-4822	3.04384	1	21.4784
TCGA-BP-5187	1.11233	0	39.4784
TCGA-B1-A47M	1.80548	0	9.12733
TCGA-B9-5155	1.82192	0	9.56727
TCGA-G6-A8L6	0.857534	1	126.062
