# Supplementary material for: Sunitinib-suppressed miR-452-5p facilitates renal cancer cell invasion and metastasis through modulating SMAD4/SMAD7 signals
Source: Mol Cancer. 2018 Nov 12;17:157. doi: 10.1186/s12943-018-0906-x (PMC6231268; doi:10.1186/s12943-018-0906-x)
Supplement: Supplementary file 8 — Table S8. miR-452-5p expression and corresponding P65 expression in RCC and normal renal samples from TCGA RCC dataset. (XLSX 38.1 kb) [file 12943_2018_906_MOESM8_ESM.xlsx]

## Sheet: Sheet1
Table S8. miR-452-5p expression and corresponding P65 expression in RCC and normal renal samples from RCC TCGA dataset
ID	hsa-miR-452-5p	P65
TCGA-IA-A83W-01A	59.1571	15.8308
TCGA-A3-3385-01A	23.1693	11.3996
TCGA-A3-3311-01A	66.9646	18.8359
TCGA-CZ-5985-01A	91.9387	14.887
TCGA-DW-7842-01A	2.24476	20.8914
TCGA-BP-5173-01A	25.9314	12.972
TCGA-DV-5575-01A	42.3607	19.4308
TCGA-CW-6087-01A	57.1912	19.9584
TCGA-BP-4161-01A	165.759	17.6534
TCGA-A3-A8OW-01A	145.591	16.5766
TCGA-UZ-A9Q0-01A	1.15427	8.11099
TCGA-EV-5901-01A	37.2128	22.6963
TCGA-BP-4337-01A	39.936	16.475
TCGA-F9-A7Q0-01A	11.3182	21.7764
TCGA-B3-4103-01A	9.97695	13.9078
TCGA-GL-A9DC-01A	42.0915	17.3549
TCGA-A4-7996-01A	3.01757	12.0859
TCGA-BP-5201-01A	66.8631	18.9792
TCGA-CW-5587-01A	78.6479	17.2708
TCGA-UN-AAZ9-01A	11.7112	18.3256
TCGA-BP-5200-01A	37.2946	24.5489
TCGA-CZ-4862-01A	87.7382	15.932
TCGA-BP-4962-01A	70.6968	13.4788
TCGA-CJ-4904-01A	73.6149	19.7372
TCGA-B0-5102-01A	33.7828	16.7075
TCGA-B0-5705-01A	29.4695	16.3935
TCGA-CJ-4918-01A	66.6136	16.8913
TCGA-B0-4691-01A	21.7632	17.0696
TCGA-B8-4619-01A	24.295	12.624
TCGA-Y8-A8S1-01A	45.2765	18.5742
TCGA-MM-A84U-01A	176.974	14.8924
TCGA-UZ-A9PJ-01A	1.82119	16.512
TCGA-BP-5004-01A	55.0752	16.2685
TCGA-B0-5119-01A	70.3699	17.8647
TCGA-B1-A47N-01A	16.7059	12.4321
TCGA-SX-A7SS-01A	15.7029	8.53451
TCGA-B0-5106-01A	81.4949	18.8859
TCGA-CW-5584-01A	135.22	20.9916
TCGA-IA-A83S-01A	14.7258	10.3552
TCGA-IZ-8195-01A	10.8001	8.17618
TCGA-A3-A6NI-01A	107.024	20.2267
TCGA-2Z-A9JP-01A	8.01852	11.129
TCGA-P4-AAVL-01A	36.7809	19.1066
TCGA-B0-4816-01A	83.6548	19.5665
TCGA-B0-4700-01A	44.9087	22.0511
TCGA-CJ-5680-01A	35.0397	18.6577
TCGA-DZ-6135-01A	13.429	21.9205
TCGA-MH-A855-01A	17.8429	14.1078
TCGA-BP-4974-01A	124.355	20.8505
TCGA-G7-7501-01A	10.1097	12.5465
TCGA-B0-5098-01A	109.332	24.095
TCGA-2Z-A9J5-01A	15.1751	11.5907
TCGA-BP-4766-01A	41.9508	19.1046
TCGA-Y8-A894-01A	1.55158	21.5053
TCGA-B2-5633-01A	60.495	2.4176
TCGA-2Z-A9J7-01A	2.91741	16.5107
TCGA-B0-4822-01A	21.4784	15.406
TCGA-AK-3460-01A	49.3391	18.8136
TCGA-HE-A5NJ-01A	7.6383	16.1189
TCGA-BP-4799-01A	189.165	15.3681
TCGA-A3-3320-01A	63.4547	17.8971
TCGA-B3-4104-01A	14.3244	21.2192
TCGA-A4-A5DU-01A	4.75605	12.4121
TCGA-B0-5402-01A	170.674	12.4019
TCGA-A3-3357-01A	13.1799	12.4553
TCGA-AK-3428-01A	65.0424	30.1627
TCGA-B0-4833-01A	32.7111	18.3622
TCGA-A3-3317-01A	77.4035	18.3662
TCGA-V9-A7HT-01A	14.1477	13.802
TCGA-BP-4992-01A	27.2445	15.7631
TCGA-B8-A54E-01A	24.1957	8.60918
TCGA-B0-5092-01A	37.9159	19.3187
TCGA-5P-A9K4-01A	92.2678	16.7388
TCGA-5P-A9JV-01A	116.713	15.4843
TCGA-EU-5906-01A	42.72	17.5909
TCGA-BP-4968-01A	29.3415	14.9841
TCGA-DV-5565-01A	142.878	25.0059
TCGA-B0-4703-01A	58.2723	18.6404
TCGA-BP-4976-01A	41.2923	15.1257
TCGA-B1-5398-01A	20.2822	18.9393
TCGA-B8-5546-01A	12.1086	11.4274
TCGA-B8-5550-01A	47.1314	14.6998
TCGA-B8-4620-01A	102.76	23.3016
TCGA-BQ-5881-01A	28.9447	8.52508
TCGA-B4-5832-01A	210.691	3.04259
TCGA-MH-A857-01A	10.8479	10.3245
TCGA-CJ-4636-01A	20.4023	13.6742
TCGA-B0-4813-01A	27.9467	14.7619
TCGA-B2-5635-01A	79.505	16.6669
TCGA-BP-4781-01A	42.0472	15.1601
TCGA-B9-A5W7-01A	3.80157	13.8643
TCGA-UZ-A9PL-01A	17.6871	19.7075
TCGA-AK-3436-01A	53.5883	14.0552
TCGA-A3-3374-01A	6.296	15.9595
TCGA-SX-A7SQ-01A	27.1682	16.3059
TCGA-DW-7834-01A	24.8117	24.1246
TCGA-B0-5691-01A	39.4298	16.6291
TCGA-BP-4765-01A	41.9267	19.5643
TCGA-B8-4143-01A	25.5024	21.491
TCGA-PJ-A5Z8-01A	30.2535	15.4152
TCGA-BP-4771-01A	83.0449	19.788
TCGA-AL-3467-01A	2.24369	16.2383
TCGA-BP-4174-01A	37.3829	14.6133
TCGA-B0-5690-01A	93.8492	21.3396
TCGA-CW-5591-01A	194.302	18.477
TCGA-BP-4176-01A	49.7696	15.1281
TCGA-B0-5080-01A	64.8818	19.8088
TCGA-SX-A71V-01A	5.00706	10.0853
TCGA-P4-A5E7-01A	21.0933	15.064
TCGA-5P-A9K0-01A	4.85856	14.1105
TCGA-A3-3387-01A	68.4165	16.7337
TCGA-B0-4698-01A	54.4508	22.4316
TCGA-CJ-4637-01A	42.5864	19.5828
TCGA-CJ-5682-01A	185.193	22.9101
TCGA-BP-4998-01A	83.8356	15.5783
TCGA-CZ-5988-01A	120.051	13.9704
TCGA-DW-5561-01A	16.2715	14.3727
TCGA-BP-5191-01A	101.408	10.0285
TCGA-A3-3308-01A	78.9125	19.0889
TCGA-GL-A4EM-01A	29.2945	13.0429
TCGA-BQ-7061-01A	43.5753	15.783
TCGA-AK-3458-01A	57.8786	10.3972
TCGA-BP-4173-01A	31.9935	24.1974
TCGA-A3-3370-01A	30.8415	17.1138
TCGA-CJ-5671-01A	104.158	18.5447
TCGA-B0-4824-01A	18.3704	18.5493
TCGA-B9-4117-01A	17.9668	17.0107
TCGA-BQ-7046-01A	9.32561	13.0618
TCGA-BP-4326-01A	27.9614	22.3576
TCGA-BP-4329-01A	56.1712	19.03
TCGA-B0-4712-01A	61.2374	18.418
TCGA-BQ-7062-01A	11.5541	16.5939
TCGA-SX-A7SU-01A	15.8598	21.2332
TCGA-UZ-A9PU-01A	1.61529	14.5324
TCGA-CJ-4897-01A	59.8419	13.719
TCGA-UZ-A9PR-01A	3.40216	20.9054
TCGA-BP-4763-01A	101.976	9.7393
TCGA-4A-A93Y-01A	70.5253	16.0723
TCGA-B9-A44B-01A	153.554	13.5926
TCGA-UZ-A9PP-01A	30.1678	18.9242
TCGA-A4-7915-01A	170.575	16.489
TCGA-B0-5694-01A	158.938	15.3202
TCGA-BP-4345-01A	81.8131	20.4026
TCGA-BP-5174-01A	145.044	14.9333
TCGA-BP-4987-01A	52.0557	16.282
TCGA-BP-5176-01A	89.0351	24.0533
TCGA-B0-5696-01A	70.9323	16.3324
TCGA-G7-6790-01A	17.8423	14.1033
TCGA-B0-4696-01A	10.0819	13.1621
TCGA-B0-4699-01A	48.6465	19.5126
TCGA-DV-A4W0-05A	30.2901	17.4564
TCGA-B0-5697-01A	115.061	15.8907
TCGA-AL-3472-01A	5.41454	16.059
TCGA-AK-3431-01A	54.1487	23.1085
TCGA-B0-5084-01A	6.56473	11.3423
TCGA-BP-5010-01A	31.6324	17.2454
TCGA-MH-A55W-01A	5.09113	12.3962
TCGA-DZ-6133-01A	5.45993	13.0131
TCGA-BP-5168-01A	5.27008	18.2098
TCGA-A4-8311-01A	20.7099	13.4425
TCGA-CW-6088-01A	79.779	17.9691
TCGA-B8-4622-01A	206.646	18.0582
TCGA-A4-8516-01A	2.62915	14.9989
TCGA-B1-A47M-01A	9.12733	19.7713
TCGA-B0-5702-01A	81.5537	12.0746
TCGA-B4-5378-01A	27.3234	19.2802
TCGA-B8-5164-01A	21.3727	18.6462
TCGA-CZ-4860-01A	32.1433	22.4867
TCGA-CJ-6030-01A	53.5504	17.3699
TCGA-AK-3433-01A	9.1132	14.6354
TCGA-CZ-5469-01A	41.6922	12.7528
TCGA-CZ-5463-01A	192.105	12.8861
TCGA-AK-3434-01A	87.0008	19.7747
TCGA-AL-3466-01A	40.2532	7.54092
TCGA-B0-5120-01A	100.136	16.2861
TCGA-BP-5194-01A	44.6715	14.3732
TCGA-GL-A9DD-01A	18.5415	11.5471
TCGA-CJ-4873-01A	60.1714	14.9164
TCGA-CJ-4635-01A	18.227	18.6817
TCGA-2Z-A9JL-01A	13.5671	17.5646
TCGA-B0-5812-01A	69.9	19.019
TCGA-F9-A8NY-01A	102.909	17.9815
TCGA-BP-5202-01A	83.562	20.1848
TCGA-B0-5077-01A	25.389	14.9404
TCGA-A4-7734-01A	21.7162	18.9818
TCGA-BP-5170-01A	85.8377	20.5122
TCGA-CJ-4876-01A	22.0641	23.9117
TCGA-CW-5590-01A	38.1224	18.445
TCGA-B0-4846-01A	122.023	22.3692
TCGA-A3-A8CQ-01A	68.4008	21.5775
TCGA-B9-A8YH-01A	8.93267	15.1246
TCGA-B8-A54F-01A	30.2198	17.4832
TCGA-Y8-A896-01A	10.6933	14.7685
TCGA-CJ-5672-01A	116.432	17.0758
TCGA-SX-A71W-01A	7.25821	15.1021
TCGA-B0-4811-01A	31.5301	13.7575
TCGA-HE-A5NF-01A	13.4335	11.9019
TCGA-BQ-5894-01A	96.6846	27.4918
TCGA-B0-4852-01A	62.1707	17.8053
TCGA-B2-4099-01A	116.302	21.6119
TCGA-EV-5902-01A	2.27475	18.3177
TCGA-B0-4836-01A	113.409	17.5651
TCGA-2Z-A9JE-01A	1.7474	15.7925
TCGA-Y8-A895-01A	13.8955	13.0662
TCGA-BQ-7048-01A	28.6313	18.758
TCGA-BQ-5882-01A	91.2176	10.1644
TCGA-A3-3324-01A	39.5926	15.9943
TCGA-CZ-5467-01A	74.0444	20.4557
TCGA-B1-A47O-01A	36.2112	12.2561
TCGA-CJ-4907-01A	88.9158	17.5865
TCGA-AK-3447-01A	20.9327	5.30629
TCGA-BP-5187-01A	39.4784	17.3531
TCGA-P4-A5E6-01A	15.8748	14.9716
TCGA-B0-5712-01A	29.8035	16.2237
TCGA-CJ-6028-01A	124.347	18.174
TCGA-AL-A5DJ-01A	15.0732	16.6546
TCGA-J7-A8I2-01A	66.7924	12.8527
TCGA-A4-A7UZ-01A	9.71783	15.8733
TCGA-2Z-A9J9-01A	37.1148	21.5419
TCGA-4A-A93W-01A	15.1585	16.8412
TCGA-AK-3461-01A	37.9826	24.916
TCGA-DW-7839-01A	3.00021	16.0931
TCGA-CZ-4864-01A	28.3172	17.5989
TCGA-P4-AAVM-01A	11.759	10.9295
TCGA-BP-4965-01A	85.3902	15.5889
TCGA-CJ-4905-01A	81.3173	18.7107
TCGA-CJ-5683-01A	101.089	19.8777
TCGA-2Z-A9J2-01A	63.9992	12.1792
TCGA-2Z-A9JS-01A	4.10109	16.1172
TCGA-B2-3924-01A	35.0146	8.35491
TCGA-BP-4776-01A	108.884	20.5042
TCGA-A4-7287-01A	425.439	19.3388
TCGA-SX-A7SR-01A	3.08273	13.0086
TCGA-BP-5186-01A	34.8947	18.9273
TCGA-A3-A6NJ-01A	37.6067	23.5035
TCGA-CJ-4643-01A	47.5007	18.3532
TCGA-G7-6789-01A	103.657	15.8762
TCGA-A3-3313-01A	37.8287	12.7562
TCGA-B0-5100-01A	32.6409	23.2274
TCGA-AK-3440-01A	20.5626	23.3193
TCGA-CJ-4881-01A	230.621	15.5427
TCGA-B0-5107-01A	1.83116	20.0859
TCGA-B3-8121-01A	8.85758	16.0259
TCGA-DW-5560-01A	13.9006	15.9917
TCGA-CJ-4872-01A	92.6753	18.8445
TCGA-BQ-5877-01A	122.682	21.2736
TCGA-CJ-4912-01A	115.203	15.9854
TCGA-Y8-A8RZ-01A	21.0437	15.1946
TCGA-BP-4981-01A	250.27	16.9446
TCGA-BP-4975-01A	68.697	15.3763
TCGA-B2-5636-01A	30.7982	20.576
TCGA-B8-A54H-01A	41.46	19.5133
TCGA-BQ-5875-01A	29.4292	12.0647
TCGA-G7-6796-01A	40.2169	16.7411
TCGA-CZ-4865-01A	176.503	14.7349
TCGA-BP-4353-01A	115.905	11.5412
TCGA-BP-4342-01A	58.738	17.7551
TCGA-BP-4777-01A	131.114	12.4025
TCGA-CJ-5675-01A	26.9607	22.3882
TCGA-AL-7173-01A	52.0532	16.2679
TCGA-A3-3372-01A	138.059	21.4808
TCGA-CZ-4853-01A	92.6666	15.9998
TCGA-BQ-7045-01A	20.7743	20.7851
TCGA-AK-3426-01A	27.7115	14.1169
TCGA-5P-A9KE-01A	3.80321	10.1433
TCGA-BP-4330-01A	45.5807	17.1312
TCGA-BP-4977-01A	145.066	16.3479
TCGA-DW-7838-01A	12.8663	17.3773
TCGA-WN-AB4C-01A	31.4305	6.15027
TCGA-BQ-5883-01A	20.4727	13.0816
TCGA-CJ-4641-01A	30.3326	16.4649
TCGA-GL-7966-01A	56.3133	21.4231
TCGA-CZ-4859-01A	30.2455	17.6527
TCGA-B0-5075-01A	11.2349	12.4525
TCGA-MM-A563-01A	59.8447	18.8261
TCGA-B2-4102-01A	127.377	16.3713
TCGA-B0-4688-01A	953.672	21.1275
TCGA-BP-5009-01A	46.4379	14.3798
TCGA-A4-A5Y1-01A	80.7061	23.5888
TCGA-B8-5552-01B	41.1897	19.3698
TCGA-BP-4985-01A	203.482	14.2139
TCGA-BP-5182-01A	83.1296	17.7628
TCGA-BQ-5880-01A	77.5879	11.5246
TCGA-B8-4151-01A	131.983	20.663
TCGA-A3-A6NN-01A	51.8907	18.6283
TCGA-A4-A57E-01A	14.0293	14.3191
TCGA-B8-A54J-01A	51.3285	21.8893
TCGA-5P-A9K9-01A	68.2361	10.3006
TCGA-A3-3378-01A	114.309	16.3686
TCGA-B2-3923-01A	14.9841	14.892
TCGA-G7-A8LC-01A	14.3141	20.1324
TCGA-AK-3451-01A	22.3209	10.4484
TCGA-A4-8098-01A	11.5083	21.0457
TCGA-BP-5195-01A	86.5968	17.6709
TCGA-BP-5190-01A	183.169	14.1005
TCGA-BP-5000-01A	57.5983	15.3768
TCGA-2Z-A9J8-01A	25.1512	12.8774
TCGA-BP-4325-01A	32.3077	15.6151
TCGA-B2-3924-01B	39.6737	11.5843
TCGA-BP-4790-01A	82.0355	18.0437
TCGA-G7-A8LD-01A	37.1842	23.2957
TCGA-BQ-5879-01A	184.613	23.2733
TCGA-BP-4327-01A	82.0019	20.5997
TCGA-DW-7840-01A	4.47246	15.2526
TCGA-BP-5185-01A	29.9822	11.4079
TCGA-BP-4993-01A	87.2656	23.8267
TCGA-B8-A8YJ-01A	60.4601	25.3255
TCGA-CZ-4856-01A	61.6777	15.3435
TCGA-B8-A7U6-01A	89.1832	27.5287
TCGA-CJ-4891-01A	9.49064	20.3115
TCGA-CJ-4638-01A	22.9642	14.1478
TCGA-CZ-5461-01A	41.4238	15.9646
TCGA-CZ-5455-01A	91.481	13.9192
TCGA-BP-5178-01A	92.9656	17.3617
TCGA-SX-A7SL-01A	4.30691	12.7625
TCGA-CJ-5677-01A	110.133	18.2873
TCGA-BP-4797-01A	27.4102	13.9906
TCGA-DW-7837-01A	5.62678	16.1259
TCGA-B0-5094-01A	103.947	16.129
TCGA-CZ-5464-01A	118.583	13.4768
TCGA-B8-5159-01A	27.4107	14.6313
TCGA-BP-5192-01A	57.9112	16.6831
TCGA-CJ-4890-01A	71.5512	15.6463
TCGA-BQ-7049-01A	54.8166	21.286
TCGA-CZ-5457-01A	18.0479	14.895
TCGA-BP-4761-01A	44.9892	22.4078
TCGA-B0-4814-01A	33.9952	17.3328
TCGA-BP-5177-01A	50.648	17.4677
TCGA-BQ-5888-01A	75.3419	15.399
TCGA-P4-A5EB-01A	34.5629	17.8758
TCGA-SX-A7SM-01A	149.47	21.0587
TCGA-B0-5096-01A	52.0203	17.2067
TCGA-G7-6793-01A	37.95	19.9355
TCGA-DW-7836-01A	12.0224	18.1594
TCGA-BP-4759-01A	42.7472	16.9794
TCGA-BP-5007-01A	198.305	14.1497
TCGA-CZ-5987-01A	116.896	21.3778
TCGA-BP-4762-01A	68.926	15.1991
TCGA-B0-5110-01A	84.2578	19.9267
TCGA-A4-8517-01A	2.93769	14.3507
TCGA-B2-3923-01B	23.6664	5.12034
TCGA-GL-6846-01A	20.9847	16.1954
TCGA-B0-4821-01A	259.173	17.4984
TCGA-F9-A97G-01A	44.5258	12.7559
TCGA-A3-3380-01A	133.466	17.2573
TCGA-A4-7584-01A	5.08492	14.9553
TCGA-B0-4848-01A	86.6396	23.0253
TCGA-EU-5904-01A	101.891	16.8483
TCGA-GL-A9DE-01A	30.4465	16.3318
TCGA-B0-5104-01A	171.315	24.2792
TCGA-MM-A564-01A	174.545	13.3498
TCGA-GL-7773-01A	9.49937	20.3714
TCGA-P4-A5E8-01A	78.8747	19.0416
TCGA-B9-A5W8-01A	7.9407	21.1746
TCGA-CJ-4869-01A	74.2652	19.001
TCGA-BQ-7055-01A	8.426	14.4117
TCGA-B0-4834-01A	34.3285	12.1524
TCGA-CZ-4857-01A	151.02	14.843
TCGA-2Z-A9JN-01A	22.6379	11.9992
TCGA-CJ-4875-01A	115.254	12.9743
TCGA-A3-3322-01A	39.7218	17.3059
TCGA-G7-6795-01A	12.2486	10.1699
TCGA-IZ-A6M8-01A	6.62592	12.6125
TCGA-B0-4697-01A	35.155	22.5922
TCGA-A3-3365-01A	61.3821	20.8664
TCGA-DV-5569-01A	134.464	22.9415
TCGA-A3-3351-01A	41.2023	18.9356
TCGA-A3-3347-01A	97.529	17.1192
TCGA-AK-3445-01A	26.3731	19.9093
TCGA-B2-5641-01A	36.1512	13.4953
TCGA-BQ-7051-01A	3.08948	16.6734
TCGA-BQ-5885-01A	173.155	13.7545
TCGA-G6-A5PC-01A	53.9591	12.9571
TCGA-B8-5163-01A	175.452	16.6783
TCGA-CJ-4642-01B	34.3687	17.1491
TCGA-B0-5695-01A	53.4797	20.3541
TCGA-IA-A40X-01A	7.89892	18.1402
TCGA-DV-5574-01A	44.2611	15.4485
TCGA-2Z-A9JD-01A	18.6679	11.5327
TCGA-B4-5835-01A	315.528	15.0503
TCGA-B0-4714-01A	36.1584	16.0418
TCGA-2Z-A9J1-01A	16.17	11.8486
TCGA-CZ-5453-01A	33.4078	18.8286
TCGA-CZ-4866-01A	29.899	10.8957
TCGA-B0-5709-01A	32.7465	20.1799
TCGA-CJ-4882-01A	58.4926	18.2925
TCGA-B4-5836-01A	40.3377	17.4612
TCGA-B9-4617-01A	6.59556	10.7489
TCGA-CZ-4863-01A	19.7586	15.3558
TCGA-CZ-5984-01A	89.0895	17.6509
TCGA-UZ-A9Q1-01A	4.99372	9.29693
TCGA-B0-4945-01A	69.1128	19.123
TCGA-A4-7288-01A	6.64057	13.7141
TCGA-B0-5097-01A	109.092	18.6491
TCGA-B9-5155-01A	9.56727	17.2403
TCGA-5P-A9JZ-01A	4.6541	17.77
TCGA-2Z-A9JG-01A	15.2695	12.7558
TCGA-BP-4346-01A	14.1901	19.2957
TCGA-UZ-A9PM-01A	7.72406	15.1428
TCGA-HE-A5NK-01A	23.3272	16.6768
TCGA-B3-3926-01A	4.15682	16.0358
TCGA-UZ-A9PZ-01A	11.4047	13.1692
TCGA-B9-7268-01A	1.54652	14.7293
TCGA-P4-A5EA-01A	54.8654	18.2414
TCGA-2Z-A9JT-01A	11.3848	11.2339
TCGA-2K-A9WE-01A	15.9524	13.3243
TCGA-CZ-5460-01A	27.0692	16.1211
TCGA-B8-A54K-01A	28.8237	16.3084
TCGA-IA-A83V-01A	38.0957	16.5456
TCGA-GL-8500-01A	4.24656	13.6045
TCGA-BQ-7044-01A	4.43847	8.01287
TCGA-BQ-5884-01A	16.7396	13.1359
TCGA-UZ-A9PS-05A	27.0267	13.603
TCGA-BP-4355-01A	96.0479	22.3042
TCGA-2Z-A9JM-01A	23.7919	14.6483
TCGA-CJ-4916-01A	112.002	17.5674
TCGA-CZ-5451-01A	36.5126	17.2853
TCGA-B8-5545-01A	47.8014	18.2574
TCGA-CJ-4884-01A	18.8794	12.7561
TCGA-AK-3465-01A	32.0344	8.71517
TCGA-BP-4770-01A	39.1698	20.0989
TCGA-AK-3425-01A	141.154	21.1475
TCGA-CJ-4878-01A	43.7086	28.0806
TCGA-CZ-5470-01A	69.0244	14.7825
TCGA-CJ-4887-01A	32.6119	16.0759
TCGA-HE-A5NI-01A	20.8091	9.02852
TCGA-G7-6797-01A	2.93263	16.1515
TCGA-B2-5633-01B	50.4556	8.98832
TCGA-BP-4789-01A	116.427	17.5028
TCGA-CZ-5466-01A	154.907	15.5819
TCGA-B8-A54I-01A	57.2955	16.6187
TCGA-A4-8312-01A	8.77399	13.0418
TCGA-A3-3346-01A	159.363	16.2136
TCGA-B0-5121-01A	180.46	15.3688
TCGA-MW-A4EC-01A	43.7831	22.1851
TCGA-A4-8515-01A	2.27934	14.5364
TCGA-BP-4971-01A	30.5453	15.8179
TCGA-A3-A8OX-01A	69.5333	15.1254
TCGA-B8-A54G-01A	20.2631	16.9533
TCGA-5P-A9JU-01A	59.8887	15.1245
TCGA-B0-5700-01A	42.4777	25.0929
TCGA-DZ-6132-01A	25.8069	17.2345
TCGA-HE-A5NH-01A	1.27883	17.0372
TCGA-B8-5162-01A	39.1828	19.3655
TCGA-B0-4827-01A	138.038	20.5399
TCGA-CZ-5465-01A	123.279	16.879
TCGA-UZ-A9PX-01A	5.58151	16.9719
TCGA-A3-3383-01A	174.771	17.7457
TCGA-A4-7585-01A	32.534	12.0629
TCGA-WN-A9G9-01A	170.666	14.6156
TCGA-CZ-4854-01A	320.407	13.3608
TCGA-BP-4961-01A	137.754	16.8485
TCGA-CJ-6033-01A	33.423	16.1594
TCGA-A3-3323-01A	99.9853	14.646
TCGA-BP-5196-01A	32.0021	19.1763
TCGA-BP-4162-01A	35.8223	15.9485
TCGA-B8-5158-01A	96.2593	15.8764
TCGA-BP-4159-01A	116.136	15.9278
TCGA-T7-A92I-01A	21.2307	15.5182
TCGA-BP-4986-01A	81.0357	16.4488
TCGA-B8-5551-01A	98.5101	19.6016
TCGA-2Z-A9J6-01A	14.891	12.9265
TCGA-B4-5843-01A	91.617	15.2237
TCGA-BP-4332-01A	39.7115	18.9567
TCGA-2Z-A9JK-01A	97.689	18.0297
TCGA-B2-A4SR-01A	88.7932	16.5789
TCGA-4A-A93X-01A	14.1336	11.1916
TCGA-UZ-A9PK-01A	21.5891	16.2147
TCGA-B0-5399-01A	51.6964	19.6662
TCGA-B3-A6W5-01A	14.0296	12.1598
TCGA-BP-5181-01A	63.22	18.0121
TCGA-B4-5844-01A	75.8029	18.3248
TCGA-BP-5008-01A	44.8618	18.8417
TCGA-UZ-A9PN-01A	71.7288	22.974
TCGA-B0-4810-01A	33.1209	21.426
TCGA-CW-5589-01A	76.1337	17.6115
TCGA-2Z-A9JR-01A	4.49786	14.5883
TCGA-BQ-5891-01A	167.172	14.8809
TCGA-A4-7997-01A	33.6718	12.9026
TCGA-MH-A560-01A	19.3744	11.0913
TCGA-BP-4334-01A	8.29543	22.9807
TCGA-5P-A9K2-01A	3.86766	8.81335
TCGA-CJ-4901-01A	104.959	21.1586
TCGA-DV-A4VZ-01A	32.7016	24.4802
TCGA-B0-4818-01A	85.2621	26.7949
TCGA-5P-A9KA-01A	39.5421	16.9257
TCGA-J7-8537-01A	24.7041	9.36328
TCGA-A4-8518-01A	33.3836	8.86593
TCGA-B1-A655-01A	8.84675	11.5795
TCGA-AK-3453-01A	35.4398	18.8468
TCGA-B0-5707-01A	19.7082	14.6785
TCGA-BP-4354-01A	26.8473	17.6938
TCGA-A4-8630-01A	4.10817	13.8837
TCGA-B0-4838-01A	66.2364	21.7546
TCGA-B0-4828-01A	21.329	18.5476
TCGA-A4-A4ZT-01A	10.5974	14.4454
TCGA-G6-A8L8-01A	155.744	23.0058
TCGA-O9-A75Z-01A	6.34218	20.2734
TCGA-B0-4718-01A	41.3072	25.2685
TCGA-AL-3473-01A	75.8945	14.8689
TCGA-B3-3925-01A	11.193	15.2204
TCGA-CJ-4639-01A	57.522	16.0181
TCGA-IZ-8196-01A	9.40152	15.8642
TCGA-AK-3427-01A	20.9753	11.0241
TCGA-AK-3443-01A	8.98256	11.7402
TCGA-BP-5183-01A	187.434	19.7011
TCGA-SX-A71S-01A	7.43849	23.1196
TCGA-CJ-4920-01A	74.2427	20.4184
TCGA-A3-3319-01A	147.318	19.2875
TCGA-B0-4842-01A	28.8472	13.3682
TCGA-B0-4845-01A	36.3182	19.8543
TCGA-B0-4694-01A	50.1543	17.3208
TCGA-CZ-5452-01A	224.466	16.9503
TCGA-DW-7963-01B	6.74753	7.3509
TCGA-CJ-6032-01A	44.6643	20.1625
TCGA-CJ-5679-01A	237.893	16.3911
TCGA-BP-4163-01A	82.3122	17.3473
TCGA-CJ-5684-01A	134.126	18.4852
TCGA-B9-A69E-01A	45.702	14.7802
TCGA-BP-4967-01A	44.6078	12.7332
TCGA-BP-4768-01A	67.5019	15.4144
TCGA-2Z-A9JJ-01A	43.5703	17.8298
TCGA-CZ-5986-01A	35.8343	16.113
TCGA-UZ-A9PQ-01A	27.4412	18.9717
TCGA-5P-A9KF-01A	6.66971	13.2576
TCGA-B1-7332-01A	6.50428	14.4064
TCGA-BP-4347-01A	34.8018	18.3984
TCGA-A3-3307-01A	49.042	20.6752
TCGA-IA-A83T-01A	10.8467	20.9957
TCGA-SX-A7SN-01A	2.93744	15.6134
TCGA-BP-4335-01A	127.265	16.6792
TCGA-BP-4995-01A	42.7391	13.9428
TCGA-BP-4795-01A	39.9571	21.8763
TCGA-BP-4982-01A	191.091	16.2202
TCGA-CJ-4886-01A	70.4369	16.3557
TCGA-BP-4769-01A	37.8675	22.9708
TCGA-B0-5113-01A	42.9287	18.0929
TCGA-2Z-A9JI-01A	85.0242	11.3584
TCGA-BP-4804-01A	167.389	17.2576
TCGA-CW-5585-01A	52.104	18.9807
TCGA-2Z-A9JQ-01A	13.4604	14.564
TCGA-DV-5567-01A	18.9882	19.5848
TCGA-G7-7502-01A	18.5283	12.4133
TCGA-B0-5400-01A	53.0714	14.5667
TCGA-CZ-5462-01A	146.483	13.8486
TCGA-BP-4352-01A	17.2801	18.0201
TCGA-AT-A5NU-01A	3.64188	14.1545
TCGA-B2-5639-01A	223.075	20.2547
TCGA-G7-A4TM-01A	13.2291	19.4393
TCGA-BQ-7058-01A	21.6655	10.2499
TCGA-BP-4341-01A	106.351	19.9896
TCGA-B9-4113-01A	3.18146	16.9408
TCGA-BP-4758-01A	42.5609	19.1799
TCGA-BP-4167-01A	53.5474	16.9658
TCGA-SX-A7SP-01A	22.1281	13.8465
TCGA-B8-5165-01A	58.1775	15.2189
TCGA-B4-5834-01A	82.2232	16.3611
TCGA-A4-A6HP-01A	4.51225	13.5372
TCGA-BP-5199-01A	28.6187	22.5567
TCGA-CJ-4908-01A	80.8721	18.2109
TCGA-BP-4983-01A	304.86	13.5577
TCGA-EV-5903-01A	48.9546	18.2194
TCGA-B0-5115-01A	45.1087	19.8554
TCGA-DV-5568-01A	32.6888	18.3917
TCGA-B0-5699-01A	34.5826	20.377
TCGA-HE-A5NL-01A	8.64272	13.0685
TCGA-B0-5711-01A	137.239	16.2891
TCGA-SX-A71U-01A	6.95333	13.7186
TCGA-B0-5693-01A	106.814	22.8303
TCGA-DW-7841-01A	6.69926	17.2579
TCGA-5P-A9K6-01A	15.6175	12.7432
TCGA-B0-5713-01A	46.4537	17.4187
TCGA-5P-A9JY-01A	1.32502	14.0912
TCGA-BP-4960-01A	260.939	16.5229
TCGA-CJ-4895-01A	23.1979	19.7332
TCGA-KV-A74V-01A	19.9739	11.1827
TCGA-BP-4158-01A	36.0179	15.4326
TCGA-AK-3450-01A	117.323	18.4939
TCGA-B0-4841-01A	140.665	16.8895
TCGA-BP-4973-01A	124.205	14.2159
TCGA-A3-3367-01A	104.629	15.0951
TCGA-6D-AA2E-01A	91.8326	10.8978
TCGA-A4-7732-01A	1.04893	14.8607
TCGA-B2-4098-01A	18.5175	14.4025
TCGA-B4-5377-01A	47.9516	21.413
TCGA-A4-7828-01A	39.0054	20.8487
TCGA-B1-A657-01A	14.9824	13.0227
TCGA-BQ-7059-01A	24.9449	17.9818
TCGA-AS-3777-01A	16.5098	12.0488
TCGA-BP-4338-01A	114.739	10.734
TCGA-B8-4154-01A	30.9942	13.0466
TCGA-UZ-A9PS-01A	5.29175	11.7352
TCGA-CZ-5458-01A	29.1375	14.2674
TCGA-CJ-4900-01A	29.8977	20.6979
TCGA-BP-4963-01A	26.8769	15.6333
TCGA-CJ-4644-01A	31.077	16.0324
TCGA-A3-3349-01A	134.275	21.0747
TCGA-B0-4690-01A	36.1969	25.0774
TCGA-CW-5588-01A	83.3474	13.3902
TCGA-AK-3455-01A	28.9405	15.1027
TCGA-CW-5583-01A	46.9007	15.695
TCGA-BQ-5893-01A	69.5271	20.2192
TCGA-B0-4844-01A	20.1761	20.1198
TCGA-MH-A562-01A	2.58573	14.429
TCGA-B0-5088-01A	36.129	15.7195
TCGA-AL-3468-01A	4.54215	15.4348
TCGA-BP-4344-01A	91.7983	18.5596
TCGA-G7-A8LB-01A	1.44151	9.36291
TCGA-BQ-5886-01A	25.8777	8.01588
TCGA-BP-4994-01A	12.2222	14.6923
TCGA-CJ-5689-01A	39.8526	17.7267
TCGA-CJ-5686-01A	39.1072	18.124
TCGA-BQ-5892-01A	27.0123	15.4871
TCGA-AK-3456-01A	6.63122	13.2527
TCGA-CJ-4893-01A	35.0064	15.8836
TCGA-BP-4803-01A	148.789	15.7841
TCGA-B0-5099-01A	42.2722	22.2102
TCGA-BP-4970-01A	40.6388	17.6171
TCGA-CJ-4634-01A	73.7712	17.2242
TCGA-3Z-A93Z-01A	125.994	18.4487
TCGA-B0-4701-01A	79.9518	25.9976
TCGA-G7-A8LE-01A	18.9473	20.1164
TCGA-MH-A55Z-01A	3.18188	14.5515
TCGA-CW-6093-01A	43.4426	22.0153
TCGA-B8-4153-01B	141.12	21.0769
TCGA-BP-4807-01A	29.0833	14.5141
TCGA-SX-A71R-01A	0.765969	12.0656
TCGA-2Z-A9J3-01A	3.82979	13.163
TCGA-P4-AAVK-01A	27.5476	12.3555
TCGA-Y8-A898-01A	14.1752	15.033
TCGA-GL-A59T-01A	10.317	12.4416
TCGA-BP-4798-01A	74.5102	16.9112
TCGA-CJ-4892-01A	43.052	17.8572
TCGA-AL-3471-01A	4.26189	9.46417
TCGA-AK-3454-01A	64.1961	15.278
TCGA-B0-4823-01A	37.0918	20.801
TCGA-Q2-A5QZ-01A	65.6558	17.1151
TCGA-CJ-4885-01A	45.8691	21.7432
TCGA-BP-4169-01A	53.7118	23.1198
TCGA-B0-5085-01A	105.486	16.8549
TCGA-B4-5838-01A	63.263	11.8278
TCGA-B0-5095-01A	85.7563	19.0573
TCGA-HE-7130-01A	262.305	21.5979
TCGA-B0-5081-01A	108.177	16.3232
TCGA-CJ-4899-01A	33.1089	17.828
TCGA-G7-6792-01A	8.96321	23.5616
TCGA-CZ-5454-01A	115.938	15.0312
TCGA-A3-3326-01A	101.624	16.6448
TCGA-B9-A5W9-01A	12.8428	16.8481
TCGA-BQ-7050-01A	5.74317	13.3638
TCGA-UZ-A9PV-01A	0.974497	15.0762
TCGA-B0-5083-01A	21.8778	15.0559
TCGA-B0-4707-01A	82.534	10.0489
TCGA-BP-5169-01A	13.9338	14.9755
TCGA-Y8-A8S0-01A	12.9915	16.966
TCGA-IA-A40Y-01A	69.4638	14.4537
TCGA-B1-A654-01A	25.7002	15.7985
TCGA-B8-4148-01A	25.8581	24.0133
TCGA-PJ-A5Z9-01A	10.1115	12.7893
TCGA-B0-4843-01A	96.21	15.4436
TCGA-CZ-5982-01A	77.9824	22.6927
TCGA-5P-A9KH-01A	9.14184	15.136
TCGA-IZ-A6M9-01A	2.30118	13.5198
TCGA-J7-6720-01A	27.7479	14.1338
TCGA-B8-5553-01A	99.0282	21.8171
TCGA-B0-5706-01A	14.0628	17.8958
TCGA-BQ-7056-01A	81.6517	13.443
TCGA-CZ-4858-01A	10.3747	19.1174
TCGA-CJ-5681-01A	26.6717	13.0031
TCGA-KV-A6GD-01A	52.609	13.6978
TCGA-B2-4101-01A	94.2942	17.8879
TCGA-BP-4343-01A	143.165	10.97
TCGA-B8-4146-01B	156.95	5.14389
TCGA-A4-A5XZ-01A	11.6701	10.583
TCGA-UZ-A9PO-01A	10.4223	10.8595
TCGA-CZ-5456-01A	115.401	13.2489
TCGA-A3-3382-01A	52.1663	15.2625
TCGA-BQ-7060-01A	14.2793	12.6392
TCGA-BP-4989-01A	35.136	14.6257
TCGA-P4-A5ED-01A	14.4995	18.1967
TCGA-B2-5635-01B	88.8779	6.93102
TCGA-BP-5198-01A	90.452	18.7214
TCGA-BP-4331-01A	63.6327	23.5997
TCGA-CJ-6027-01A	61.0126	22.3108
TCGA-CJ-4903-01A	28.1725	15.5577
TCGA-BP-4787-01A	85.4761	14.1758
TCGA-B0-4839-01A	29.4661	17.612
TCGA-A3-A8OV-01A	90.9019	17.7409
TCGA-GL-A59R-01A	7.35037	14.4473
TCGA-KV-A6GE-01A	11.2169	10.0644
TCGA-BP-4160-01A	91.2016	14.0438
TCGA-BP-5175-01A	105.442	10.2803
TCGA-B0-4819-01A	59.8684	15.1969
TCGA-DV-A4W0-01A	68.1222	20.1889
TCGA-SX-A7SO-01A	6.29834	11.2309
TCGA-BP-4340-01A	31.897	17.8357
TCGA-DZ-6134-01A	19.3106	16.4739
TCGA-A3-3358-01A	89.8235	15.4167
TCGA-BP-4760-01A	30.8824	20.875
TCGA-IA-A40U-01A	20.0896	15.3917
TCGA-B9-4115-01A	4.30587	14.9303
TCGA-DV-A4VX-01A	177.441	12.2923
TCGA-BP-4782-01A	114.32	15.9046
TCGA-5P-A9KC-01A	18.3189	13.9863
TCGA-CW-6097-01A	45.4828	16.9232
TCGA-A4-A48D-01A	4.281	12.7332
TCGA-CJ-4902-01A	100.673	17.7853
TCGA-B8-A54D-01A	23.5388	13.1549
TCGA-BP-4775-01A	42.8023	17.0638
TCGA-BP-4959-01A	111.94	15.9629
TCGA-F9-A4JJ-01A	76.2964	28.1885
TCGA-A4-A772-01A	14.1659	15.3066
TCGA-MH-A856-01A	17.6286	17.3609
TCGA-P4-AAVO-01A	10.0212	11.2126
TCGA-BQ-5889-01A	122.216	17.2841
TCGA-B0-5108-01A	81.1545	17.6266
TCGA-CJ-5676-01A	124.165	17.5902
TCGA-B0-5109-01A	35.3171	15.674
TCGA-GK-A6C7-01A	63.6977	25.3381
TCGA-B8-4621-01A	15.5945	11.0444
TCGA-CZ-4861-01A	31.4045	16.5797
TCGA-B0-4817-01A	135.092	13.8789
TCGA-A4-8310-01A	7.56625	12.1985
TCGA-CJ-4871-01A	91.2711	16.9793
TCGA-DV-5576-01A	28.1401	19.3416
TCGA-CJ-5678-01A	16.4206	13.8694
TCGA-B0-4849-01A	48.4427	24.1032
TCGA-A3-3363-01A	6.92588	16.285
TCGA-A3-A8OU-01A	97.8592	23.5407
TCGA-BP-4801-01A	51.8139	17.5183
TCGA-B0-4815-01A	111.853	18.0308
TCGA-A4-7286-01A	13.2564	17.2721
TCGA-B0-5117-01A	14.2036	13.5333
TCGA-CJ-4640-01A	53.9832	17.0157
TCGA-DV-5566-01A	50.5071	20.8583
TCGA-G6-A8L7-01A	98.7022	11.8847
TCGA-B9-4116-01A	5.16819	21.2987
TCGA-2Z-A9JO-01A	36.866	8.99108
TCGA-CJ-4888-01A	21.1337	19.7388
TCGA-B0-5703-01A	27.1002	18.4679
TCGA-CZ-5989-01A	61.745	3.93767
TCGA-MH-A854-01A	15.4788	18.2781
TCGA-CZ-5468-01A	118.948	15.6853
TCGA-BQ-5878-01A	46.539	17.107
TCGA-BQ-5890-01A	34.1108	15.8248
TCGA-BP-4177-01A	20.6102	20.9435
TCGA-Y8-A8RY-01A	16.4598	15.4651
TCGA-CJ-6031-01A	21.9179	14.4296
TCGA-EU-5905-01A	55.1711	14.6649
TCGA-B8-5549-01A	26.9634	15.7408
TCGA-5P-A9K3-01A	11.6793	15.4176
TCGA-A3-3331-01A	70.355	18.9552
TCGA-CJ-4889-01A	42.7285	17.37
TCGA-BP-4166-01A	57.7325	15.9645
TCGA-B0-4710-01A	56.8117	28.134
TCGA-A3-3362-01A	48.6485	18.2856
TCGA-B0-5698-01A	43.4206	23.8302
TCGA-BP-4969-01A	65.659	11.0714
TCGA-B9-A8YI-01A	18.5323	10.1123
TCGA-CJ-4894-01A	56.5137	17.2228
TCGA-CZ-5459-01A	112.179	14.5672
TCGA-B1-A656-01A	56.7276	13.4964
TCGA-CW-5580-01A	36.5576	18.5461
TCGA-B9-5156-01A	13.4322	16.3181
TCGA-BP-4164-01A	35.2693	17.5828
TCGA-A3-3376-01A	50.0721	20.3954
TCGA-B0-4713-01A	192.214	10.4447
TCGA-EU-5907-01A	13.6935	16.7035
TCGA-A4-7583-01A	4.30315	20.9414
TCGA-A4-A5Y0-01A	60.6656	15.8932
TCGA-B0-5701-01A	92.6578	15.322
TCGA-BP-5180-01A	104.142	19.3388
TCGA-B0-4837-01A	51.2582	15.6531
TCGA-B0-5116-01A	151.047	16.4546
TCGA-MH-A561-01A	7.87546	21.8442
TCGA-BP-4756-01A	7.56272	11.6332
TCGA-AK-3429-01A	29.0844	15.8557
TCGA-A3-A6NL-01A	62.8633	20.3276
TCGA-CW-5581-01A	44.6789	13.8937
TCGA-B0-5710-01A	106.654	18.9384
TCGA-5P-A9JW-01A	16.6382	12.4288
TCGA-B0-5692-01A	28.7777	22.5367
TCGA-Y8-A897-01A	14.0782	13.553
TCGA-F9-A7VF-01A	4.64604	14.112
TCGA-G6-A8L6-01A	126.062	20.5107
TCGA-B0-4847-01A	13.3395	19.1406
TCGA-BQ-5887-01A	45.9814	12.6015
TCGA-BP-5189-01A	118.585	15.3846
TCGA-CW-6090-01A	59.6466	19.0073
TCGA-A3-3373-01A	49.9062	17.7794
TCGA-BP-4991-01A	41.3728	15.1713
TCGA-BQ-5876-01A	15.6122	10.6123
TCGA-HE-7129-01A	1.93101	18.078
TCGA-A3-3316-01A	130.85	12.9539
TCGA-BP-5001-01A	45.6918	15.7853
TCGA-B0-4706-01A	122.11	19.676
TCGA-B0-4693-01A	29.8961	18.593
TCGA-BP-4351-01A	50.7623	16.2443
TCGA-CJ-4870-01A	101.88	21.5234
TCGA-DV-5573-01A	26.3671	18.7759
TCGA-BQ-7053-01A	16.8506	16.4888
TCGA-BP-4972-01A	133.459	14.8528
TCGA-HE-7128-01A	10.2511	14.1031
TCGA-BP-5184-01A	104.917	18.745
TCGA-5P-A9K8-01A	17.7936	12.8643
TCGA-BP-4165-01A	115.889	21.4681
