# Supplementary material for: Sunitinib-suppressed miR-452-5p facilitates renal cancer cell invasion and metastasis through modulating SMAD4/SMAD7 signals
Source: Mol Cancer. 2018 Nov 12;17:157. doi: 10.1186/s12943-018-0906-x (PMC6231268; doi:10.1186/s12943-018-0906-x)
Supplement: Supplementary file 9 — Table S9. P65 expression in RCC and normal renal samples from TCGA RCC dataset. (XLS 136 kb) [file 12943_2018_906_MOESM9_ESM.xls]

## Sheet: Sheet1
Table S9. P65 expression in RCC and normal renal samples from RCC TCGA dataset
ID	expression	Type
TCGA-BQ-7044-11A-01R-1965-07	13.7417	Normal
TCGA-A3-3387-11A-01R-1541-07	11.4952	Normal
TCGA-BQ-7055-11A-01R-1965-07	14.9122	Normal
TCGA-DZ-6132-11A-01R-1965-07	20.4143	Normal
TCGA-CW-5585-11A-01R-1541-07	13.7523	Normal
TCGA-CZ-5462-11A-01R-1503-07	12.8234	Normal
TCGA-CZ-5986-11A-01R-1672-07	11.7744	Normal
TCGA-BQ-5891-11A-01R-1592-07	12.557	Normal
TCGA-GL-A59R-11A-11R-A26U-07	19.2976	Normal
TCGA-BQ-5877-11A-01R-1592-07	12.0891	Normal
TCGA-B0-5696-11A-01R-1541-07	11.7201	Normal
TCGA-BQ-7045-11A-01R-1965-07	17.4227	Normal
TCGA-B0-4700-11A-01R-1541-07	10.6909	Normal
TCGA-CJ-6033-11A-01R-1858-07	12.1106	Normal
TCGA-B0-5711-11A-01R-1672-07	14.998	Normal
TCGA-GL-7966-11A-01R-2204-07	15.8411	Normal
TCGA-DZ-6131-11A-01R-1965-07	13.9058	Normal
TCGA-CZ-4865-11A-01R-1503-07	18.2255	Normal
TCGA-A3-3358-11A-01R-1541-07	10.8587	Normal
TCGA-BQ-5879-11A-01R-1592-07	13.1682	Normal
TCGA-DZ-6134-11A-01R-1965-07	16.6315	Normal
TCGA-CZ-5454-11A-01R-1503-07	16.7741	Normal
TCGA-CZ-5982-11A-01R-1672-07	8.95993	Normal
TCGA-CZ-5463-11A-01R-1503-07	11.9866	Normal
TCGA-GL-6846-11A-01R-1965-07	12.8716	Normal
TCGA-B8-5549-11A-01R-1541-07	13.9602	Normal
TCGA-CJ-5680-11A-01R-1541-07	20.4693	Normal
TCGA-DZ-6133-11A-01R-1965-07	13.1932	Normal
TCGA-CZ-5453-11A-01R-1503-07	16.2333	Normal
TCGA-B8-4622-11A-01R-1758-07	11.3405	Normal
TCGA-B0-5697-11A-01R-1541-07	13.0757	Normal
TCGA-BQ-7046-11A-01R-1965-07	15.5477	Normal
TCGA-CZ-5467-11A-01R-1503-07	21.6696	Normal
TCGA-B2-5641-11A-01R-1541-07	15.81	Normal
TCGA-B9-4115-11A-01R-1758-07	14.4919	Normal
TCGA-CW-5587-11A-01R-1541-07	11.8471	Normal
TCGA-CW-6087-11A-01R-1672-07	10.6239	Normal
TCGA-A4-A57E-11A-11R-A26U-07	12.017	Normal
TCGA-CJ-5679-11A-01R-1541-07	15.5681	Normal
TCGA-CW-5580-11A-02R-1672-07	15.8836	Normal
TCGA-BQ-5875-11A-01R-1592-07	17.0772	Normal
TCGA-CZ-4864-11A-01R-1503-07	10.274	Normal
TCGA-B8-4620-11A-01R-1758-07	17.4129	Normal
TCGA-CZ-5989-11A-01R-1672-07	15.4032	Normal
TCGA-BQ-5888-11A-01R-1592-07	18.7926	Normal
TCGA-B0-5709-11A-01R-1541-07	12.5257	Normal
TCGA-CJ-5676-11A-01R-1541-07	14.5922	Normal
TCGA-BQ-5884-11A-01R-1592-07	13.0479	Normal
TCGA-CZ-5469-11A-01R-1503-07	15.5951	Normal
TCGA-CZ-5987-11A-01R-1672-07	16.4833	Normal
TCGA-CZ-5984-11A-01R-1672-07	12.6326	Normal
TCGA-B8-5552-11A-01R-1672-07	13.1916	Normal
TCGA-BQ-5887-11A-01R-1965-07	27.3975	Normal
TCGA-BQ-5890-11A-01R-1592-07	15.9756	Normal
TCGA-B0-4712-11A-02R-1503-07	16.0829	Normal
TCGA-CW-5584-11A-01R-1541-07	16.4255	Normal
TCGA-Y8-A8RY-11A-11R-A37K-07	18.8158	Normal
TCGA-B0-5699-11A-01R-1541-07	11.0963	Normal
TCGA-CZ-5451-11A-01R-1503-07	11.7029	Normal
TCGA-CW-6090-11A-01R-1672-07	10.0627	Normal
TCGA-BQ-7051-11A-02R-1965-07	18.8405	Normal
TCGA-B8-4619-11A-01R-1758-07	10.3823	Normal
TCGA-B2-5636-11A-01R-1541-07	11.0584	Normal
TCGA-CZ-5468-11A-01R-1503-07	15.6049	Normal
TCGA-CZ-5465-11A-01R-1503-07	15.0163	Normal
TCGA-B0-5712-11A-01R-1672-07	17.1418	Normal
TCGA-CJ-5689-11A-01R-1541-07	18.7063	Normal
TCGA-CZ-4863-11A-01R-1503-07	14.6008	Normal
TCGA-CW-5589-11A-01R-1541-07	13.4385	Normal
TCGA-CZ-5456-11A-02R-1503-07	19.0077	Normal
TCGA-B0-5701-11A-01R-1541-07	15.2352	Normal
TCGA-GL-A9DE-11A-11R-A37K-07	16.357	Normal
TCGA-CZ-5470-11A-01R-1503-07	14.4954	Normal
TCGA-CZ-5458-11A-01R-1503-07	17.9656	Normal
TCGA-B0-5705-11A-01R-1541-07	11.9853	Normal
TCGA-B0-5690-11A-01R-1541-07	12.2688	Normal
TCGA-P4-A5E8-11A-12R-A28H-07	15.6723	Normal
TCGA-B0-5703-11A-01R-1541-07	14.3816	Normal
TCGA-CJ-5681-11A-01R-1541-07	12.1738	Normal
TCGA-CZ-5988-11A-01R-1672-07	10.4758	Normal
TCGA-B0-5706-11A-01R-1541-07	17.21	Normal
TCGA-B0-5694-11A-01R-1541-07	16.1239	Normal
TCGA-CJ-5672-11A-01R-1541-07	14.2333	Normal
TCGA-BQ-5894-11A-01R-1592-07	10.864	Normal
TCGA-CW-6088-11A-01R-1672-07	14.3834	Normal
TCGA-CZ-5452-11A-01R-1503-07	15.9517	Normal
TCGA-CZ-5455-11A-01R-1503-07	13.6387	Normal
TCGA-CJ-6030-11A-01R-1672-07	11.7161	Normal
TCGA-CZ-5461-11A-01R-1503-07	13.7014	Normal
TCGA-BQ-5882-11A-01R-1592-07	14.6528	Normal
TCGA-CZ-5985-11A-01R-1672-07	8.67385	Normal
TCGA-B0-5691-11A-01R-1541-07	11.6362	Normal
TCGA-BQ-7059-11A-01R-1965-07	15.209	Normal
TCGA-CJ-5677-11A-01R-1541-07	12.7116	Normal
TCGA-CZ-5466-11A-01R-1503-07	10.4416	Normal
TCGA-BQ-7061-11A-01R-1965-07	19.0507	Normal
TCGA-B0-5402-11A-01R-1503-07	11.8795	Normal
TCGA-CZ-5457-11A-01R-1503-07	15.5942	Normal
TCGA-CW-5591-11A-01R-1541-07	14.362	Normal
TCGA-A4-A4ZT-11A-11R-A26U-07	15.178	Normal
TCGA-CJ-5678-11A-01R-1541-07	11.0608	Normal
TCGA-BQ-5878-11A-01R-1592-07	12.3325	Normal
TCGA-P4-A5ED-11A-11R-A28H-07	15.9867	Normal
TCGA-CW-5581-11A-01R-1541-07	11.1108	Normal
TCGA-UZ-A9PS-05A-11R-A42S-07	13.603	Tumor
TCGA-A3-A6NI-01A-11R-A33J-07	20.2267	Tumor
TCGA-BP-4353-01A-02R-1289-07	11.5412	Tumor
TCGA-A3-3380-01A-01R-0864-07	17.2573	Tumor
TCGA-B0-5706-01A-11R-1541-07	17.8958	Tumor
TCGA-B0-4699-01A-01R-1277-07	19.5126	Tumor
TCGA-5P-A9K3-01A-11R-A42S-07	15.4176	Tumor
TCGA-AK-3460-01A-02R-1277-07	18.8136	Tumor
TCGA-HE-7129-01A-11R-1965-07	18.078	Tumor
TCGA-CJ-6032-01A-11R-1672-07	20.1625	Tumor
TCGA-B0-5113-01A-01R-1420-07	18.0929	Tumor
TCGA-B0-4833-01A-01R-1305-07	18.3622	Tumor
TCGA-AK-3427-01A-01R-0864-07	11.0241	Tumor
TCGA-BP-4961-01A-01R-1334-07	16.8485	Tumor
TCGA-G6-A8L8-01A-21R-A37O-07	23.0058	Tumor
TCGA-AK-3461-01A-02R-1277-07	24.916	Tumor
TCGA-2Z-A9JN-01A-21R-A42S-07	11.9992	Tumor
TCGA-G6-A8L6-01A-11R-A37O-07	20.5107	Tumor
TCGA-B4-5838-01A-11R-1672-07	11.8278	Tumor
TCGA-B0-4823-01A-02R-1420-07	20.801	Tumor
TCGA-5P-A9KA-01A-11R-A42S-07	16.9257	Tumor
TCGA-A3-3320-01A-02R-1325-07	17.8971	Tumor
TCGA-2Z-A9J8-01A-11R-A42S-07	12.8774	Tumor
TCGA-EV-5901-01A-11R-1592-07	22.6963	Tumor
TCGA-HE-A5NL-01A-11R-A26U-07	13.0685	Tumor
TCGA-B0-5117-01A-01R-1420-07	13.5333	Tumor
TCGA-B8-4153-01B-11R-1672-07	21.0769	Tumor
TCGA-CJ-5681-01A-11R-1541-07	13.0031	Tumor
TCGA-B0-5692-01A-11R-1541-07	22.5367	Tumor
TCGA-BQ-7053-01A-11R-1965-07	16.4888	Tumor
TCGA-CJ-4636-01A-02R-1325-07	13.6742	Tumor
TCGA-G7-A4TM-01A-11R-A31O-07	19.4393	Tumor
TCGA-P4-AAVK-01A-11R-A42S-07	12.3555	Tumor
TCGA-UZ-A9PV-01A-11R-A42S-07	15.0762	Tumor
TCGA-BP-4801-01A-02R-1420-07	17.5183	Tumor
TCGA-CJ-4869-01A-02R-1426-07	19.001	Tumor
TCGA-BQ-5886-01A-11R-1592-07	8.01588	Tumor
TCGA-CJ-4908-01A-01R-1426-07	18.2109	Tumor
TCGA-CZ-5985-01A-11R-1672-07	14.887	Tumor
TCGA-DV-5565-01A-01R-1541-07	25.0059	Tumor
TCGA-BP-4782-01A-02R-1420-07	15.9046	Tumor
TCGA-G7-A8LE-01A-11R-A36F-07	20.1164	Tumor
TCGA-B0-4841-01A-01R-1277-07	16.8895	Tumor
TCGA-G7-6796-01A-11R-1965-07	16.7411	Tumor
TCGA-2Z-A9JG-01A-11R-A42S-07	12.7558	Tumor
TCGA-BP-5173-01A-01R-1426-07	12.972	Tumor
TCGA-BP-5007-01A-01R-1334-07	14.1497	Tumor
TCGA-BP-4177-01A-02R-1420-07	20.9435	Tumor
TCGA-2Z-A9JE-01A-11R-A42S-07	15.7925	Tumor
TCGA-BP-4991-01A-01R-1334-07	15.1713	Tumor
TCGA-B0-4698-01A-01R-1503-07	22.4316	Tumor
TCGA-BP-5009-01A-01R-1334-07	14.3798	Tumor
TCGA-A4-7584-01A-11R-2139-07	14.9553	Tumor
TCGA-B4-5843-01A-11R-1672-07	15.2237	Tumor
TCGA-BP-5001-01A-01R-1334-07	15.7853	Tumor
TCGA-B0-5399-01A-01R-1503-07	19.6662	Tumor
TCGA-A3-A8OU-01A-11R-A37O-07	23.5407	Tumor
TCGA-BP-4999-01A-01R-1334-07	15.9869	Tumor
TCGA-CJ-4876-01A-01R-1305-07	23.9117	Tumor
TCGA-CJ-5686-01A-11R-1672-07	18.124	Tumor
TCGA-5P-A9KF-01A-11R-A42S-07	13.2576	Tumor
TCGA-IZ-8196-01A-11R-2404-07	15.8642	Tumor
TCGA-B0-4843-01A-01R-1277-07	15.4436	Tumor
TCGA-B0-5116-01A-02R-1420-07	16.4546	Tumor
TCGA-BP-4759-01A-01R-1289-07	16.9794	Tumor
TCGA-B0-5083-01A-02R-1420-07	15.0559	Tumor
TCGA-A4-7734-01A-11R-A32Z-07	18.9818	Tumor
TCGA-B0-4815-01A-01R-1503-07	18.0308	Tumor
TCGA-BP-4334-01A-01R-1289-07	22.9807	Tumor
TCGA-CZ-4861-01A-01R-1305-07	16.5797	Tumor
TCGA-CJ-4902-01A-01R-1426-07	17.7853	Tumor
TCGA-DV-5574-01A-01R-1541-07	15.4485	Tumor
TCGA-BQ-5891-01A-11R-1592-07	14.8809	Tumor
TCGA-B0-5121-01A-02R-1420-07	15.3688	Tumor
TCGA-CZ-4856-01A-02R-1426-07	15.3435	Tumor
TCGA-B0-5110-01A-01R-1420-07	19.9267	Tumor
TCGA-BP-4804-01A-02R-1305-07	17.2576	Tumor
TCGA-G7-6793-01A-11R-1965-07	19.9355	Tumor
TCGA-B9-5155-01A-01R-1592-07	17.2403	Tumor
TCGA-A3-3335-01A-01R-0864-07	21.585	Tumor
TCGA-2Z-A9J9-01A-11R-A42S-07	21.5419	Tumor
TCGA-Y8-A894-01A-11R-A36F-07	21.5053	Tumor
TCGA-GL-8500-01A-11R-2404-07	13.6045	Tumor
TCGA-CJ-5682-01A-11R-1541-07	22.9101	Tumor
TCGA-SX-A7SP-01A-11R-A355-07	13.8465	Tumor
TCGA-BP-4972-01A-01R-1334-07	14.8528	Tumor
TCGA-CJ-6027-01A-11R-1672-07	22.3108	Tumor
TCGA-BQ-5890-01A-11R-1592-07	15.8248	Tumor
TCGA-Y8-A8S0-01A-11R-A37K-07	16.966	Tumor
TCGA-CJ-5675-01A-11R-1541-07	22.3882	Tumor
TCGA-BP-4355-01A-01R-1289-07	22.3042	Tumor
TCGA-BP-4960-01A-01R-1334-07	16.5229	Tumor
TCGA-A3-3378-01A-02R-1325-07	16.3686	Tumor
TCGA-BP-4160-01A-02R-1289-07	14.0438	Tumor
TCGA-5P-A9JY-01A-11R-A42S-07	14.0912	Tumor
TCGA-F9-A4JJ-01A-11R-A24Z-07	28.1885	Tumor
TCGA-B8-5163-01A-01R-1420-07	16.6783	Tumor
TCGA-G7-7501-01A-11R-2204-07	12.5465	Tumor
TCGA-CZ-4859-01A-02R-1426-07	17.6527	Tumor
TCGA-B8-4154-01A-01R-1188-07	13.0466	Tumor
TCGA-DW-7837-01A-11R-2139-07	16.1259	Tumor
TCGA-B3-4104-01A-02R-1351-07	21.2192	Tumor
TCGA-A4-8516-01A-11R-2404-07	14.9989	Tumor
TCGA-A3-A8OX-01A-11R-A37O-07	15.1254	Tumor
TCGA-B0-4713-01A-01R-1277-07	10.4447	Tumor
TCGA-B0-5098-01A-01R-1420-07	24.095	Tumor
TCGA-A3-A8OW-01A-11R-A37O-07	16.5766	Tumor
TCGA-BQ-5888-01A-11R-1592-07	15.399	Tumor
TCGA-A3-3382-01A-02R-1325-07	15.2625	Tumor
TCGA-B9-A8YI-01A-21R-A37K-07	10.1123	Tumor
TCGA-CZ-4866-01A-01R-1503-07	10.8957	Tumor
TCGA-A4-A5Y1-01A-11R-A28H-07	23.5888	Tumor
TCGA-A3-3311-01A-02R-1325-07	18.8359	Tumor
TCGA-B2-4099-01A-02R-1188-07	21.6119	Tumor
TCGA-BP-4965-01A-01R-1334-07	15.5889	Tumor
TCGA-BQ-5883-01A-11R-1592-07	13.0816	Tumor
TCGA-BP-4342-01A-01R-1289-07	17.7551	Tumor
TCGA-CW-5589-01A-01R-1541-07	17.6115	Tumor
TCGA-B0-5701-01A-11R-1541-07	15.322	Tumor
TCGA-B8-5553-01A-01R-1541-07	21.8171	Tumor
TCGA-A3-A6NJ-01A-12R-A33J-07	23.5035	Tumor
TCGA-B9-4113-01A-01R-1193-07	16.9408	Tumor
TCGA-DZ-6133-01A-11R-1965-07	13.0131	Tumor
TCGA-BQ-7061-01A-11R-1965-07	15.783	Tumor
TCGA-B1-A47N-01A-11R-A24Z-07	12.4321	Tumor
TCGA-AL-3471-01A-02R-1351-07	9.46417	Tumor
TCGA-MH-A55Z-01A-11R-A26U-07	14.5515	Tumor
TCGA-A4-A6HP-01A-11R-A31O-07	13.5372	Tumor
TCGA-B2-A4SR-01A-11R-A266-07	16.5789	Tumor
TCGA-CJ-4881-01A-01R-1305-07	15.5427	Tumor
TCGA-B9-A5W9-01A-11R-A28H-07	16.8481	Tumor
TCGA-Y8-A898-01A-11R-A355-07	15.033	Tumor
TCGA-A4-8518-01A-11R-2404-07	8.86593	Tumor
TCGA-MH-A855-01A-11R-A355-07	14.1078	Tumor
TCGA-CW-5584-01A-01R-1541-07	20.9916	Tumor
TCGA-B0-4837-01A-01R-1305-07	15.6531	Tumor
TCGA-BP-5184-01A-01R-1426-07	18.745	Tumor
TCGA-B0-5096-01A-01R-1420-07	17.2067	Tumor
TCGA-A3-3351-01A-02R-1325-07	18.9356	Tumor
TCGA-A3-3373-01A-02R-1420-07	17.7794	Tumor
TCGA-B0-4697-01A-01R-1277-07	22.5922	Tumor
TCGA-HE-A5NJ-01A-11R-A26U-07	16.1189	Tumor
TCGA-CZ-5987-01A-11R-1672-07	21.3778	Tumor
TCGA-DW-7834-01A-11R-2139-07	24.1246	Tumor
TCGA-B8-5546-01A-01R-1541-07	11.4274	Tumor
TCGA-A3-3325-01A-01R-0864-07	19.5584	Tumor
TCGA-B2-5636-01A-02R-1541-07	20.576	Tumor
TCGA-Y8-A8S1-01A-11R-A37K-07	18.5742	Tumor
TCGA-2Z-A9J6-01A-11R-A38C-07	12.9265	Tumor
TCGA-Y8-A8RY-01A-11R-A37K-07	15.4651	Tumor
TCGA-CJ-6033-01A-11R-1672-07	16.1594	Tumor
TCGA-B4-5377-01A-01R-1503-07	21.413	Tumor
TCGA-B8-5550-01A-01R-1541-07	14.6998	Tumor
TCGA-BP-5180-01A-01R-1426-07	19.3388	Tumor
TCGA-BP-4768-01A-01R-1289-07	15.4144	Tumor
TCGA-A4-8098-01A-11R-2404-07	21.0457	Tumor
TCGA-BP-5008-01A-01R-1334-07	18.8417	Tumor
TCGA-CJ-4916-01A-01R-1426-07	17.5674	Tumor
TCGA-BQ-5875-01A-11R-1592-07	12.0647	Tumor
TCGA-IA-A40X-01A-11R-A24Z-07	18.1402	Tumor
TCGA-CZ-4854-01A-01R-1305-07	13.3608	Tumor
TCGA-B4-5836-01A-11R-1672-07	17.4612	Tumor
TCGA-GL-A9DE-01A-11R-A37K-07	16.3318	Tumor
TCGA-B0-5707-01A-11R-1541-07	14.6785	Tumor
TCGA-B8-A54F-01A-11R-A266-07	17.4832	Tumor
TCGA-CZ-5459-01A-01R-1503-07	14.5672	Tumor
TCGA-CZ-5451-01A-01R-1503-07	17.2853	Tumor
TCGA-B8-5551-01A-01R-1541-07	19.6016	Tumor
TCGA-B8-A54E-01A-11R-A266-07	8.60918	Tumor
TCGA-A3-A6NN-01A-12R-A33J-07	18.6283	Tumor
TCGA-5P-A9K6-01A-11R-A42S-07	12.7432	Tumor
TCGA-BP-5187-01A-01R-1426-07	17.3531	Tumor
TCGA-DW-5560-01A-01R-1592-07	15.9917	Tumor
TCGA-CZ-4860-01A-01R-1305-07	22.4867	Tumor
TCGA-BQ-5881-01A-11R-1592-07	8.52508	Tumor
TCGA-P4-A5EA-01A-11R-A28H-07	18.2414	Tumor
TCGA-B0-5104-01A-01R-1420-07	24.2792	Tumor
TCGA-AK-3426-01A-02R-1325-07	14.1169	Tumor
TCGA-B0-5077-01A-01R-1334-07	14.9404	Tumor
TCGA-B9-4115-01A-01R-1193-07	14.9303	Tumor
TCGA-PJ-A5Z9-01A-11R-A28H-07	12.7893	Tumor
TCGA-B0-4849-01A-01R-1277-07	24.1032	Tumor
TCGA-BP-4352-01A-01R-1289-07	18.0201	Tumor
TCGA-B0-4694-01A-01R-1277-07	17.3208	Tumor
TCGA-CJ-4639-01A-02R-1325-07	16.0181	Tumor
TCGA-DV-5569-01A-01R-1541-07	22.9415	Tumor
TCGA-A4-A7UZ-01A-12R-A355-07	15.8733	Tumor
TCGA-AK-3443-01A-02R-1325-07	11.7402	Tumor
TCGA-B2-5641-01A-01R-1541-07	13.4953	Tumor
TCGA-B0-5710-01A-11R-1672-07	18.9384	Tumor
TCGA-CZ-5456-01A-01R-1503-07	13.2489	Tumor
TCGA-CJ-5678-01A-11R-1541-07	13.8694	Tumor
TCGA-CZ-4858-01A-01R-1305-07	19.1174	Tumor
TCGA-BP-4170-01A-02R-1289-07	17.6574	Tumor
TCGA-AK-3440-01A-02R-1277-07	23.3193	Tumor
TCGA-B3-3926-01A-02R-1351-07	16.0358	Tumor
TCGA-A3-3372-01A-02R-1325-07	21.4808	Tumor
TCGA-B0-4706-01A-01R-1503-07	19.676	Tumor
TCGA-CZ-5460-01A-01R-1503-07	16.1211	Tumor
TCGA-BP-4341-01A-01R-1289-07	19.9896	Tumor
TCGA-BP-5004-01A-01R-1334-07	16.2685	Tumor
TCGA-A4-7915-01A-11R-2204-07	16.489	Tumor
TCGA-BP-5006-01A-01R-1334-07	21.0487	Tumor
TCGA-CJ-6030-01A-11R-1672-07	17.3699	Tumor
TCGA-B0-4688-01A-01R-1277-07	21.1275	Tumor
TCGA-SX-A7SO-01A-11R-A355-07	11.2309	Tumor
TCGA-B0-5095-01A-01R-1420-07	19.0573	Tumor
TCGA-BQ-5880-01A-11R-1592-07	11.5246	Tumor
TCGA-B0-5711-01A-11R-1672-07	16.2891	Tumor
TCGA-WN-AB4C-01A-11R-A42S-07	6.15027	Tumor
TCGA-A3-3308-01A-02R-1325-07	19.0889	Tumor
TCGA-PJ-A5Z8-01A-11R-A28H-07	15.4152	Tumor
TCGA-B0-5084-01A-01R-1334-07	11.3423	Tumor
TCGA-GL-A59R-01A-11R-A26U-07	14.4473	Tumor
TCGA-BP-4994-01A-01R-1334-07	14.6923	Tumor
TCGA-A3-3324-01A-02R-1325-07	15.9943	Tumor
TCGA-G6-A8L7-01A-11R-A37O-07	11.8847	Tumor
TCGA-B0-5696-01A-11R-1541-07	16.3324	Tumor
TCGA-DV-5566-01A-01R-1541-07	20.8583	Tumor
TCGA-UZ-A9Q0-01A-12R-A42S-07	8.11099	Tumor
TCGA-B0-5691-01A-11R-1541-07	16.6291	Tumor
TCGA-UZ-A9PR-01A-11R-A42S-07	20.9054	Tumor
TCGA-A4-7996-01A-11R-2204-07	12.0859	Tumor
TCGA-A3-3346-01A-01R-1766-07	16.2136	Tumor
TCGA-BP-4347-01A-01R-1289-07	18.3984	Tumor
TCGA-CJ-4878-01A-01R-1305-07	28.0806	Tumor
TCGA-BP-4993-01A-02R-1420-07	23.8267	Tumor
TCGA-BP-4977-01A-01R-1334-07	16.3479	Tumor
TCGA-Y8-A896-01A-11R-A36F-07	14.7685	Tumor
TCGA-BP-5178-01A-01R-1426-07	17.3617	Tumor
TCGA-B8-5162-01A-01R-1420-07	19.3655	Tumor
TCGA-V9-A7HT-01A-11R-A33Z-07	13.802	Tumor
TCGA-CW-6097-01A-11R-1672-07	16.9232	Tumor
TCGA-B0-4814-01A-01R-1277-07	17.3328	Tumor
TCGA-BP-4992-01A-01R-1334-07	15.7631	Tumor
TCGA-A3-3323-01A-02R-1325-07	14.646	Tumor
TCGA-UZ-A9PS-01A-11R-A42S-07	11.7352	Tumor
TCGA-CJ-5672-01A-11R-1541-07	17.0758	Tumor
TCGA-BP-5168-01A-01R-1420-07	18.2098	Tumor
TCGA-A4-7828-01A-11R-2139-07	20.8487	Tumor
TCGA-EV-5902-01A-11R-1592-07	18.3177	Tumor
TCGA-BP-4964-01A-01R-1334-07	13.1366	Tumor
TCGA-CJ-4635-01A-02R-1305-07	18.6817	Tumor
TCGA-BP-4995-01A-01R-1334-07	13.9428	Tumor
TCGA-BP-4807-01A-01R-1305-07	14.5141	Tumor
TCGA-AK-3447-01A-01R-1766-07	5.30629	Tumor
TCGA-2Z-A9JL-01A-11R-A42S-07	17.5646	Tumor
TCGA-DW-7842-01A-11R-A32Z-07	20.8914	Tumor
TCGA-BP-4967-01A-01R-1334-07	12.7332	Tumor
TCGA-UZ-A9Q1-01A-11R-A42S-07	9.29693	Tumor
TCGA-A4-7286-01A-11R-A32Z-07	17.2721	Tumor
TCGA-A3-3362-01A-02R-1325-07	18.2856	Tumor
TCGA-3Z-A93Z-01A-11R-A37O-07	18.4487	Tumor
TCGA-A3-3357-01A-02R-1420-07	12.4553	Tumor
TCGA-UZ-A9PQ-01A-11R-A42S-07	18.9717	Tumor
TCGA-B9-A69E-01A-11R-A31O-07	14.7802	Tumor
TCGA-BP-4161-01A-02R-1325-07	17.6534	Tumor
TCGA-CZ-4862-01A-01R-1305-07	15.932	Tumor
TCGA-A4-7997-01A-11R-2204-07	12.9026	Tumor
TCGA-BP-4976-01A-01R-1334-07	15.1257	Tumor
TCGA-B2-3923-01A-02R-1325-07	14.892	Tumor
TCGA-CJ-4882-01A-02R-1426-07	18.2925	Tumor
TCGA-P4-A5E7-01A-31R-A28H-07	15.064	Tumor
TCGA-B0-5697-01A-11R-1541-07	15.8907	Tumor
TCGA-BP-5189-01A-02R-1426-07	15.3846	Tumor
TCGA-P4-AAVO-01A-11R-A42S-07	11.2126	Tumor
TCGA-BP-4766-01A-01R-1289-07	19.1046	Tumor
TCGA-P4-AAVM-01A-11R-A42S-07	10.9295	Tumor
TCGA-IA-A83S-01A-11R-A355-07	10.3552	Tumor
TCGA-CJ-4871-01A-01R-1305-07	16.9793	Tumor
TCGA-BP-4795-01A-02R-1420-07	21.8763	Tumor
TCGA-BP-5190-01A-01R-1426-07	14.1005	Tumor
TCGA-B8-4143-01A-01R-1188-07	21.491	Tumor
TCGA-CW-5583-01A-02R-1541-07	15.695	Tumor
TCGA-BP-5000-01A-01R-1334-07	15.3768	Tumor
TCGA-B0-5695-01A-11R-1541-07	20.3541	Tumor
TCGA-B0-5108-01A-01R-1420-07	17.6266	Tumor
TCGA-MH-A856-01A-11R-A355-07	17.3609	Tumor
TCGA-A3-3328-01A-01R-0864-07	19.8844	Tumor
TCGA-MH-A561-01A-11R-A26U-07	21.8442	Tumor
TCGA-DV-5576-01A-01R-1541-07	19.3416	Tumor
TCGA-B0-5109-01A-02R-1420-07	15.674	Tumor
TCGA-B8-A8YJ-01A-13R-A39I-07	25.3255	Tumor
TCGA-B0-5693-01A-11R-1541-07	22.8303	Tumor
TCGA-B0-5698-01A-11R-1672-07	23.8302	Tumor
TCGA-B2-5639-01A-01R-1541-07	20.2547	Tumor
TCGA-BP-4329-01A-02R-1289-07	19.03	Tumor
TCGA-2Z-A9JK-01A-11R-A42S-07	18.0297	Tumor
TCGA-BQ-5893-01A-11R-1592-07	20.2192	Tumor
TCGA-IA-A83W-01A-11R-A355-07	15.8308	Tumor
TCGA-B9-4116-01A-02R-1351-07	21.2987	Tumor
TCGA-BP-4162-01A-02R-1325-07	15.9485	Tumor
TCGA-B9-5156-01A-01R-1592-07	16.3181	Tumor
TCGA-B0-5699-01A-11R-1541-07	20.377	Tumor
TCGA-A3-3306-01A-01R-0864-07	17.8811	Tumor
TCGA-DW-7840-01A-11R-A32Z-07	15.2526	Tumor
TCGA-CZ-5984-01A-11R-1672-07	17.6509	Tumor
TCGA-MM-A84U-01A-11R-A37O-07	14.8924	Tumor
TCGA-B0-4827-01A-02R-1420-07	20.5399	Tumor
TCGA-DW-7841-01A-11R-A32Z-07	17.2579	Tumor
TCGA-GL-7773-01A-11R-A32Z-07	20.3714	Tumor
TCGA-BP-4765-01A-01R-1289-07	19.5643	Tumor
TCGA-2Z-A9JD-01A-11R-A42S-07	11.5327	Tumor
TCGA-A4-A4ZT-01A-11R-A26U-07	14.4454	Tumor
TCGA-2Z-A9JT-01A-11R-A42S-07	11.2339	Tumor
TCGA-A3-3352-01A-01R-0864-07	16.5557	Tumor
TCGA-J7-A8I2-01A-12R-A36F-07	12.8527	Tumor
TCGA-B0-5102-01A-01R-1420-07	16.7075	Tumor
TCGA-BP-4354-01A-02R-1289-07	17.6938	Tumor
TCGA-BP-4989-01A-01R-1334-07	14.6257	Tumor
TCGA-DV-5567-01A-01R-1541-07	19.5848	Tumor
TCGA-BP-5181-01A-01R-1426-07	18.0121	Tumor
TCGA-CJ-5671-01A-11R-1541-07	18.5447	Tumor
TCGA-CZ-5453-01A-01R-1503-07	18.8286	Tumor
TCGA-BQ-7050-01A-11R-1965-07	13.3638	Tumor
TCGA-B2-4102-01A-02R-1325-07	16.3713	Tumor
TCGA-BP-4769-01A-01R-1289-07	22.9708	Tumor
TCGA-EU-5906-01A-11R-1672-07	17.5909	Tumor
TCGA-MH-A560-01A-11R-A26U-07	11.0913	Tumor
TCGA-BP-5174-01A-01R-1426-07	14.9333	Tumor
TCGA-IA-A40U-01A-11R-A24Z-07	15.3917	Tumor
TCGA-CJ-4912-01A-01R-1426-07	15.9854	Tumor
TCGA-CJ-4875-01A-01R-1305-07	12.9743	Tumor
TCGA-B0-5115-01A-01R-1420-07	19.8554	Tumor
TCGA-BP-4173-01A-02R-1289-07	24.1974	Tumor
TCGA-B0-5097-01A-01R-1420-07	18.6491	Tumor
TCGA-4A-A93W-01A-11R-A37K-07	16.8412	Tumor
TCGA-2Z-A9JR-01A-12R-A42S-07	14.5883	Tumor
TCGA-EU-5905-01A-11R-1672-07	14.6649	Tumor
TCGA-BQ-5892-01A-11R-1592-07	15.4871	Tumor
TCGA-B0-4813-01A-01R-1277-07	14.7619	Tumor
TCGA-SX-A7SU-01A-11R-A36F-07	21.2332	Tumor
TCGA-BP-5177-01A-01R-1426-07	17.4677	Tumor
TCGA-CJ-4642-01B-01R-1305-07	17.1491	Tumor
TCGA-SX-A7SN-01A-11R-A355-07	15.6134	Tumor
TCGA-5P-A9KE-01A-11R-A42S-07	10.1433	Tumor
TCGA-P4-A5ED-01A-11R-A28H-07	18.1967	Tumor
TCGA-UZ-A9PK-01A-11R-A38C-07	16.2147	Tumor
TCGA-B8-5159-01A-01R-1420-07	14.6313	Tumor
TCGA-BQ-5884-01A-11R-1592-07	13.1359	Tumor
TCGA-P4-AAVL-01A-11R-A42S-07	19.1066	Tumor
TCGA-CJ-4637-01A-02R-1325-07	19.5828	Tumor
TCGA-4A-A93X-01A-11R-A37K-07	11.1916	Tumor
TCGA-B0-4822-01A-01R-1277-07	15.406	Tumor
TCGA-B0-5709-01A-11R-1541-07	20.1799	Tumor
TCGA-A4-A5Y0-01A-11R-A31O-07	15.8932	Tumor
TCGA-B0-4714-01A-01R-1277-07	16.0418	Tumor
TCGA-CZ-5466-01A-01R-1503-07	15.5819	Tumor
TCGA-B8-A7U6-01A-12R-A37O-07	27.5287	Tumor
TCGA-CJ-4889-01A-01R-1305-07	17.37	Tumor
TCGA-T7-A92I-01A-11R-A37O-07	15.5182	Tumor
TCGA-CJ-4893-01A-01R-1305-07	15.8836	Tumor
TCGA-BP-4756-01A-01R-1289-07	11.6332	Tumor
TCGA-A4-A5DU-01A-11R-A28H-07	12.4121	Tumor
TCGA-CJ-4641-01A-02R-1325-07	16.4649	Tumor
TCGA-A4-7732-01A-11R-2139-07	14.8607	Tumor
TCGA-B0-4818-01A-01R-1503-07	26.7949	Tumor
TCGA-BQ-7048-01A-11R-1965-07	18.758	Tumor
TCGA-BQ-5879-01A-11R-1592-07	23.2733	Tumor
TCGA-B8-5552-01B-11R-1672-07	19.3698	Tumor
TCGA-AK-3428-01A-02R-1277-07	30.1627	Tumor
TCGA-BQ-5877-01A-11R-1592-07	21.2736	Tumor
TCGA-B0-4696-01A-01R-1277-07	13.1621	Tumor
TCGA-A3-3370-01A-02R-1420-07	17.1138	Tumor
TCGA-BP-4174-01A-02R-1289-07	14.6133	Tumor
TCGA-BP-4775-01A-01R-1289-07	17.0638	Tumor
TCGA-BP-4325-01A-02R-1289-07	15.6151	Tumor
TCGA-BP-4771-01A-01R-1289-07	19.788	Tumor
TCGA-B2-5635-01A-01R-1541-07	16.6669	Tumor
TCGA-CJ-4895-01A-01R-1305-07	19.7332	Tumor
TCGA-AT-A5NU-01A-11R-A28H-07	14.1545	Tumor
TCGA-B0-4707-01A-01R-1277-07	10.0489	Tumor
TCGA-DV-A4W0-05A-11R-A266-07	17.4564	Tumor
TCGA-CZ-5989-01A-11R-1672-07	3.93767	Tumor
TCGA-CJ-5676-01A-11R-1541-07	17.5902	Tumor
TCGA-G7-A8LB-01A-11R-A36F-07	9.36291	Tumor
TCGA-B0-5812-01A-11R-1672-07	19.019	Tumor
TCGA-BP-4346-01A-01R-1289-07	19.2957	Tumor
TCGA-B3-4103-01A-02R-1351-07	13.9078	Tumor
TCGA-B0-5092-01A-01R-1420-07	19.3187	Tumor
TCGA-G7-6789-01A-11R-1965-07	15.8762	Tumor
TCGA-SX-A7SL-01A-11R-A355-07	12.7625	Tumor
TCGA-6D-AA2E-01A-11R-A37O-07	10.8978	Tumor
TCGA-BP-4982-01A-01R-1334-07	16.2202	Tumor
TCGA-BP-4971-01A-01R-1334-07	15.8179	Tumor
TCGA-BP-4970-01A-01R-1334-07	17.6171	Tumor
TCGA-B0-4710-01A-01R-1503-07	28.134	Tumor
TCGA-BP-4344-01A-01R-1289-07	18.5596	Tumor
TCGA-5P-A9JV-01A-12R-A42S-07	15.4843	Tumor
TCGA-2Z-A9JM-01A-12R-A42S-07	14.6483	Tumor
TCGA-B8-5545-01A-01R-1672-07	18.2574	Tumor
TCGA-HE-A5NH-01A-11R-A26U-07	17.0372	Tumor
TCGA-CJ-4870-01A-01R-1305-07	21.5234	Tumor
TCGA-B0-4828-01A-01R-1277-07	18.5476	Tumor
TCGA-CJ-5679-01A-11R-1541-07	16.3911	Tumor
TCGA-SX-A71V-01A-11R-A33Z-07	10.0853	Tumor
TCGA-B9-A44B-01A-11R-A24Z-07	13.5926	Tumor
TCGA-CZ-4857-01A-01R-1305-07	14.843	Tumor
TCGA-A3-3307-01A-01R-0864-07	20.6752	Tumor
TCGA-AK-3465-01A-02R-1325-07	8.71517	Tumor
TCGA-A3-3331-01A-02R-1325-07	18.9552	Tumor
TCGA-IZ-8195-01A-31R-2404-07	8.17618	Tumor
TCGA-5P-A9K0-01A-11R-A42S-07	14.1105	Tumor
TCGA-CJ-4904-01A-02R-1426-07	19.7372	Tumor
TCGA-CJ-4920-01A-01R-1426-07	20.4184	Tumor
TCGA-B0-5702-01A-11R-1541-07	12.0746	Tumor
TCGA-BQ-5889-01A-11R-1592-07	17.2841	Tumor
TCGA-BP-4163-01A-02R-1325-07	17.3473	Tumor
TCGA-IZ-A6M9-01A-11R-A31O-07	13.5198	Tumor
TCGA-B2-3924-01A-02R-A277-07	8.35491	Tumor
TCGA-B2-3924-01A-02R-1325-07	18.0108	Tumor
TCGA-BP-4777-01A-01R-1289-07	12.4025	Tumor
TCGA-CJ-4872-01A-01R-1305-07	18.8445	Tumor
TCGA-B0-5712-01A-11R-1672-07	16.2237	Tumor
TCGA-A3-A8CQ-01A-11R-A37O-07	21.5775	Tumor
TCGA-BP-4798-01A-01R-1305-07	16.9112	Tumor
TCGA-BQ-7051-01A-12R-1965-07	16.6734	Tumor
TCGA-BQ-7058-01A-11R-1965-07	10.2499	Tumor
TCGA-CZ-5461-01A-01R-1503-07	15.9646	Tumor
TCGA-BP-4337-01A-01R-1289-07	16.475	Tumor
TCGA-CJ-5683-01A-11R-1541-07	19.8777	Tumor
TCGA-CJ-4899-01A-01R-1334-07	17.828	Tumor
TCGA-A3-3365-01A-01R-0864-07	20.8664	Tumor
TCGA-A4-A5XZ-01A-11R-A31O-07	10.583	Tumor
TCGA-CZ-5468-01A-01R-1503-07	15.6853	Tumor
TCGA-B0-5694-01A-11R-1541-07	15.3202	Tumor
TCGA-AL-3472-01A-01R-1193-07	16.059	Tumor
TCGA-SX-A7SR-01A-12R-A36F-07	13.0086	Tumor
TCGA-B3-8121-01A-21R-2404-07	16.0259	Tumor
TCGA-KV-A74V-01A-11R-A33Z-07	11.1827	Tumor
TCGA-Y8-A895-01A-11R-A36F-07	13.0662	Tumor
TCGA-B0-5705-01A-11R-1541-07	16.3935	Tumor
TCGA-BP-5192-01A-01R-1426-07	16.6831	Tumor
TCGA-HE-A5NI-01A-11R-A26U-07	9.02852	Tumor
TCGA-BP-4790-01A-01R-1305-07	18.0437	Tumor
TCGA-CJ-6031-01A-11R-1672-07	14.4296	Tumor
TCGA-B1-A657-01A-11R-A31O-07	13.0227	Tumor
TCGA-G7-6795-01A-11R-1965-07	10.1699	Tumor
TCGA-B9-4617-01A-01R-1193-07	10.7489	Tumor
TCGA-B8-A54K-01A-11R-A33J-07	16.3084	Tumor
TCGA-5P-A9JZ-01A-11R-A42S-07	17.77	Tumor
TCGA-AS-3778-01A-01R-A32Z-07	19.9961	Tumor
TCGA-BP-5196-01A-01R-1426-07	19.1763	Tumor
TCGA-DW-7836-01A-11R-2139-07	18.1594	Tumor
TCGA-BQ-5887-01A-11R-1965-07	12.6015	Tumor
TCGA-GL-6846-01A-11R-1965-07	16.1954	Tumor
TCGA-CJ-4886-01A-01R-1305-07	16.3557	Tumor
TCGA-B0-5713-01A-11R-1672-07	17.4187	Tumor
TCGA-MM-A563-01A-11R-A266-07	18.8261	Tumor
TCGA-A4-8515-01A-11R-2404-07	14.5364	Tumor
TCGA-B8-5164-01A-01R-1420-07	18.6462	Tumor
TCGA-2Z-A9JQ-01A-11R-A42S-07	14.564	Tumor
TCGA-CW-6087-01A-11R-1672-07	19.9584	Tumor
TCGA-A3-3349-01A-01R-1188-07	21.0747	Tumor
TCGA-J7-8537-01A-11R-2404-07	9.36328	Tumor
TCGA-AK-3434-01A-02R-1277-07	19.7747	Tumor
TCGA-GL-7966-01A-11R-2204-07	21.4231	Tumor
TCGA-CJ-5680-01A-11R-1541-07	18.6577	Tumor
TCGA-A3-3347-01A-02R-1325-07	17.1192	Tumor
TCGA-BP-5200-01A-01R-1426-07	24.5489	Tumor
TCGA-DV-5573-01A-01R-1541-07	18.7759	Tumor
TCGA-B0-5700-01A-11R-1541-07	25.0929	Tumor
TCGA-2Z-A9JP-01A-11R-A42S-07	11.129	Tumor
TCGA-SX-A71U-01A-12R-A33Z-07	13.7186	Tumor
TCGA-CJ-4907-01A-01R-1426-07	17.5865	Tumor
TCGA-BP-4351-01A-01R-1289-07	16.2443	Tumor
TCGA-CJ-4890-01A-01R-1305-07	15.6463	Tumor
TCGA-WN-A9G9-01A-12R-A37K-07	14.6156	Tumor
TCGA-A3-3317-01A-02R-1325-07	18.3662	Tumor
TCGA-B0-5119-01A-02R-1420-07	17.8647	Tumor
TCGA-BP-4981-01A-01R-1334-07	16.9446	Tumor
TCGA-A4-7585-01A-11R-2139-07	12.0629	Tumor
TCGA-B3-A6W5-01A-12R-A33Z-07	12.1598	Tumor
TCGA-A4-8310-01A-11R-2404-07	12.1985	Tumor
TCGA-SX-A71W-01A-12R-A355-07	15.1021	Tumor
TCGA-2Z-A9J5-01A-21R-A38C-07	11.5907	Tumor
TCGA-BP-4331-01A-01R-1289-07	23.5997	Tumor
TCGA-HE-A5NF-01A-11R-A26U-07	11.9019	Tumor
TCGA-HE-7130-01A-11R-1965-07	21.5979	Tumor
TCGA-BP-4343-01A-02R-1289-07	10.97	Tumor
TCGA-BP-4335-01A-01R-1289-07	16.6792	Tumor
TCGA-P4-A5E6-01A-11R-A28H-07	14.9716	Tumor
TCGA-BQ-7059-01A-11R-1965-07	17.9818	Tumor
TCGA-B0-4712-01A-01R-1503-07	18.418	Tumor
TCGA-B8-5165-01A-01R-1420-07	15.2189	Tumor
TCGA-BQ-7045-01A-31R-1965-07	20.7851	Tumor
TCGA-B0-4703-01A-01R-1277-07	18.6404	Tumor
TCGA-BP-5176-01A-01R-1426-07	24.0533	Tumor
TCGA-CJ-4644-01A-02R-1325-07	16.0324	Tumor
TCGA-DW-7963-01B-11R-A28H-07	7.3509	Tumor
TCGA-B9-7268-01A-11R-A32Z-07	14.7293	Tumor
TCGA-CJ-4640-01A-02R-1325-07	17.0157	Tumor
TCGA-B4-5835-01A-11R-1672-07	15.0503	Tumor
TCGA-BP-4987-01A-01R-1334-07	16.282	Tumor
TCGA-B8-5549-01A-01R-1541-07	15.7408	Tumor
TCGA-BP-4164-01A-02R-1325-07	17.5828	Tumor
TCGA-BP-4327-01A-01R-1289-07	20.5997	Tumor
TCGA-A3-3367-01A-02R-1420-07	15.0951	Tumor
TCGA-G7-6797-01A-11R-1965-07	16.1515	Tumor
TCGA-AK-3454-01A-02R-1277-07	15.278	Tumor
TCGA-CJ-4901-01A-01R-1426-07	21.1586	Tumor
TCGA-A4-A772-01A-11R-A33Z-07	15.3066	Tumor
TCGA-B8-4148-01A-02R-1325-07	24.0133	Tumor
TCGA-B0-4691-01A-01R-1277-07	17.0696	Tumor
TCGA-AL-3466-01A-02R-1351-07	7.54092	Tumor
TCGA-B9-A5W7-01A-11R-A31O-07	13.8643	Tumor
TCGA-CW-6090-01A-11R-1672-07	19.0073	Tumor
TCGA-DV-5568-01A-01R-1541-07	18.3917	Tumor
TCGA-F9-A7Q0-01A-11R-A36F-07	21.7764	Tumor
TCGA-BP-4165-01A-02R-1289-07	21.4681	Tumor
TCGA-B0-5703-01A-11R-1541-07	18.4679	Tumor
TCGA-DW-5561-01A-01R-1592-07	14.3727	Tumor
TCGA-EV-5903-01A-11R-1592-07	18.2194	Tumor
TCGA-B2-5635-01A-01R-A277-07	4.0199	Tumor
TCGA-CJ-4868-01A-01R-1305-07	17.7174	Tumor
TCGA-B8-4146-01B-11R-1672-07	5.14389	Tumor
TCGA-IA-A83T-01A-11R-A355-07	20.9957	Tumor
TCGA-EU-5904-01A-11R-1672-07	16.8483	Tumor
TCGA-CJ-5689-01A-11R-1541-07	17.7267	Tumor
TCGA-AK-3458-01A-01R-1503-07	10.3972	Tumor
TCGA-BP-4158-01A-02R-1289-07	15.4326	Tumor
TCGA-AK-3451-01A-02R-1188-07	10.4484	Tumor
TCGA-CZ-5463-01A-01R-1503-07	12.8861	Tumor
TCGA-A4-A57E-01A-11R-A26U-07	14.3191	Tumor
TCGA-CZ-5457-01A-01R-1503-07	14.895	Tumor
TCGA-2Z-A9JS-01A-21R-A42S-07	16.1172	Tumor
TCGA-2Z-A9J1-01A-11R-A38C-07	11.8486	Tumor
TCGA-CZ-5454-01A-01R-1503-07	15.0312	Tumor
TCGA-BQ-5882-01A-11R-1592-07	10.1644	Tumor
TCGA-CJ-4885-01A-01R-1305-07	21.7432	Tumor
TCGA-BP-4998-01A-01R-1334-07	15.5783	Tumor
TCGA-A3-3343-01A-01R-0864-07	18.9511	Tumor
TCGA-AK-3453-01A-02R-1277-07	18.8468	Tumor
TCGA-UZ-A9PJ-01A-11R-A38C-07	16.512	Tumor
TCGA-SX-A7SM-01A-11R-A355-07	21.0587	Tumor
TCGA-BP-5183-01A-01R-1426-07	19.7011	Tumor
TCGA-A3-3363-01A-01R-0864-07	16.285	Tumor
TCGA-B1-A655-01A-11R-A31O-07	11.5795	Tumor
TCGA-AK-3429-01A-02R-1325-07	15.8557	Tumor
TCGA-CZ-5986-01A-11R-1672-07	16.113	Tumor
TCGA-B0-4824-01A-01R-1277-07	18.5493	Tumor
TCGA-B4-5844-01A-11R-1672-07	18.3248	Tumor
TCGA-5P-A9JU-01A-11R-A42S-07	15.1245	Tumor
TCGA-BP-4166-01A-02R-1289-07	15.9645	Tumor
TCGA-P4-A5E8-01A-11R-A28H-07	19.0416	Tumor
TCGA-BP-4159-01A-02R-1289-07	15.9278	Tumor
TCGA-CJ-4884-01A-01R-1305-07	12.7561	Tumor
TCGA-BP-5175-01A-01R-1426-07	10.2803	Tumor
TCGA-B0-5085-01A-01R-1334-07	16.8549	Tumor
TCGA-GK-A6C7-01A-11R-A33J-07	25.3381	Tumor
TCGA-CZ-4863-01A-01R-1503-07	15.3558	Tumor
TCGA-A3-3385-01A-02R-1420-07	11.3996	Tumor
TCGA-BP-4789-01A-01R-1305-07	17.5028	Tumor
TCGA-BP-4774-01A-01R-1289-07	24.8027	Tumor
TCGA-2Z-A9JO-01A-11R-A42S-07	8.99108	Tumor
TCGA-CJ-4892-01A-01R-1305-07	17.8572	Tumor
TCGA-4A-A93Y-01A-11R-A37K-07	16.0723	Tumor
TCGA-DV-A4W0-01A-11R-A266-07	20.1889	Tumor
TCGA-KV-A6GE-01A-11R-A31O-07	10.0644	Tumor
TCGA-B8-4151-01A-01R-1188-07	20.663	Tumor
TCGA-B0-4693-01A-01R-1277-07	18.593	Tumor
TCGA-IA-A40Y-01A-11R-A24Z-07	14.4537	Tumor
TCGA-CJ-4888-01A-01R-1305-07	19.7388	Tumor
TCGA-B4-5832-01A-11R-1672-07	3.04259	Tumor
TCGA-UN-AAZ9-01A-11R-A38C-07	18.3256	Tumor
TCGA-A3-3316-01A-01R-0864-07	12.9539	Tumor
TCGA-B0-4700-01A-02R-1541-07	22.0511	Tumor
TCGA-B9-A8YH-01A-11R-A37K-07	15.1246	Tumor
TCGA-BP-4986-01A-01R-1334-07	16.4488	Tumor
TCGA-BP-5202-01A-02R-1426-07	20.1848	Tumor
TCGA-UZ-A9PZ-01A-11R-A42S-07	13.1692	Tumor
TCGA-B8-5158-01A-01R-1420-07	15.8764	Tumor
TCGA-BP-4781-01A-01R-1305-07	15.1601	Tumor
TCGA-A4-8630-01A-11R-2404-07	13.8837	Tumor
TCGA-BQ-5878-01A-11R-1592-07	17.107	Tumor
TCGA-A3-3319-01A-02R-1325-07	19.2875	Tumor
TCGA-B0-5080-01A-01R-1503-07	19.8088	Tumor
TCGA-B8-A54H-01A-11R-A33J-07	19.5133	Tumor
TCGA-BP-4340-01A-01R-1289-07	17.8357	Tumor
TCGA-CZ-5458-01A-01R-1503-07	14.2674	Tumor
TCGA-5P-A9JW-01A-11R-A42S-07	12.4288	Tumor
TCGA-B3-3925-01A-02R-1351-07	15.2204	Tumor
TCGA-BP-4974-01A-01R-1334-07	20.8505	Tumor
TCGA-B2-4101-01A-02R-1277-07	17.8879	Tumor
TCGA-BP-4776-01A-01R-1289-07	20.5042	Tumor
TCGA-G7-6790-01A-11R-1965-07	14.1033	Tumor
TCGA-CJ-4905-01A-02R-1426-07	18.7107	Tumor
TCGA-G7-6792-01A-21R-1965-07	23.5616	Tumor
TCGA-BQ-7044-01A-11R-1965-07	8.01287	Tumor
TCGA-BP-5194-01A-02R-1426-07	14.3732	Tumor
TCGA-CJ-4874-01A-01R-1305-07	14.3524	Tumor
TCGA-BP-5185-01A-01R-1426-07	11.4079	Tumor
TCGA-GL-A9DC-01A-11R-A37K-07	17.3549	Tumor
TCGA-SX-A7SS-01A-11R-A36F-07	8.53451	Tumor
TCGA-CZ-5469-01A-01R-1503-07	12.7528	Tumor
TCGA-AL-A5DJ-01A-11R-A26U-07	16.6546	Tumor
TCGA-GL-A59T-01A-21R-A28H-07	12.4416	Tumor
TCGA-B8-A54G-01A-11R-A266-07	16.9533	Tumor
TCGA-DZ-6132-01A-11R-1965-07	17.2345	Tumor
TCGA-B0-5402-01A-01R-1503-07	12.4019	Tumor
TCGA-CZ-5988-01A-11R-1672-07	13.9704	Tumor
TCGA-AK-3436-01A-02R-1325-07	14.0552	Tumor
TCGA-BP-4797-01A-01R-1305-07	13.9906	Tumor
TCGA-G6-A5PC-01A-11R-A33J-07	12.9571	Tumor
TCGA-SX-A7SQ-01A-12R-A36F-07	16.3059	Tumor
TCGA-B8-A54J-01A-11R-A33J-07	21.8893	Tumor
TCGA-BP-4959-01A-01R-1334-07	15.9629	Tumor
TCGA-CZ-5467-01A-01R-1503-07	20.4557	Tumor
TCGA-B1-A47M-01A-11R-A24Z-07	19.7713	Tumor
TCGA-CZ-4864-01A-01R-1503-07	17.5989	Tumor
TCGA-GL-A9DD-01A-11R-A37K-07	11.5471	Tumor
TCGA-DW-7838-01A-11R-2139-07	17.3773	Tumor
TCGA-CJ-4634-01A-02R-1325-07	17.2242	Tumor
TCGA-BP-4973-01A-01R-1334-07	14.2159	Tumor
TCGA-Y8-A8RZ-01A-11R-A37K-07	15.1946	Tumor
TCGA-BP-4975-01A-01R-1334-07	15.3763	Tumor
TCGA-B0-4847-01A-01R-1277-07	19.1406	Tumor
TCGA-CJ-5677-01A-11R-1541-07	18.2873	Tumor
TCGA-CW-5585-01A-01R-1541-07	18.9807	Tumor
TCGA-DW-7839-01A-11R-2139-07	16.0931	Tumor
TCGA-A3-3326-01A-01R-0864-07	16.6448	Tumor
TCGA-CJ-4891-01A-01R-1305-07	20.3115	Tumor
TCGA-CJ-5684-01A-11R-1541-07	18.4852	Tumor
TCGA-MH-A562-01A-11R-A26U-07	14.429	Tumor
TCGA-MH-A854-01A-11R-A355-07	18.2781	Tumor
TCGA-F9-A7VF-01A-11R-A33Z-07	14.112	Tumor
TCGA-BP-4763-01A-01R-1289-07	9.7393	Tumor
TCGA-B8-4622-01A-02R-1277-07	18.0582	Tumor
TCGA-F9-A8NY-01A-11R-A36F-07	17.9815	Tumor
TCGA-AK-3450-01A-02R-1277-07	18.4939	Tumor
TCGA-MH-A55W-01A-11R-A26U-07	12.3962	Tumor
TCGA-CJ-4894-01A-01R-1305-07	17.2228	Tumor
TCGA-B0-4836-01A-01R-1305-07	17.5651	Tumor
TCGA-A3-3322-01A-02R-1325-07	17.3059	Tumor
TCGA-CZ-5982-01A-11R-1672-07	22.6927	Tumor
TCGA-CJ-6028-01A-11R-1672-07	18.174	Tumor
TCGA-BP-5169-01A-01R-1426-07	14.9755	Tumor
TCGA-B0-4819-01A-01R-1277-07	15.1969	Tumor
TCGA-A4-8312-01A-11R-2404-07	13.0418	Tumor
TCGA-A4-7288-01A-11R-A32Z-07	13.7141	Tumor
TCGA-A3-3359-01A-01R-0864-07	19.4419	Tumor
TCGA-BP-4803-01A-01R-1305-07	15.7841	Tumor
TCGA-A3-A6NL-01A-11R-A33J-07	20.3276	Tumor
TCGA-B0-4701-01A-01R-1277-07	25.9976	Tumor
TCGA-CJ-4903-01A-01R-1426-07	15.5577	Tumor
TCGA-CW-5588-01A-01R-1541-07	13.3902	Tumor
TCGA-B0-4821-01A-01R-1503-07	17.4984	Tumor
TCGA-DV-A4VZ-01A-11R-A266-07	24.4802	Tumor
TCGA-BP-5199-01A-01R-1426-07	22.5567	Tumor
TCGA-B9-4117-01A-02R-1351-07	17.0107	Tumor
TCGA-BP-5186-01A-01R-1426-07	18.9273	Tumor
TCGA-2Z-A9JJ-01A-11R-A42S-07	17.8298	Tumor
TCGA-SX-A71R-01A-12R-A33Z-07	12.0656	Tumor
TCGA-B0-4817-01A-01R-1277-07	13.8789	Tumor
TCGA-UZ-A9PM-01A-21R-A38C-07	15.1428	Tumor
TCGA-B2-5633-01B-04R-A277-07	8.98832	Tumor
TCGA-CW-6088-01A-11R-1672-07	17.9691	Tumor
TCGA-B0-4816-01A-01R-1503-07	19.5665	Tumor
TCGA-A3-3329-01A-01R-0864-07	16.104	Tumor
TCGA-AK-3433-01A-02R-1277-07	14.6354	Tumor
TCGA-BP-5010-01A-02R-1420-07	17.2454	Tumor
TCGA-CZ-5455-01A-01R-1503-07	13.9192	Tumor
TCGA-DV-A4VX-01A-11R-A266-07	12.2923	Tumor
TCGA-CJ-4873-01A-01R-1305-07	14.9164	Tumor
TCGA-5P-A9K9-01A-11R-A42S-07	10.3006	Tumor
TCGA-HE-A5NK-01A-11R-A26U-07	16.6768	Tumor
TCGA-Q2-A5QZ-01A-11R-A28H-07	17.1151	Tumor
TCGA-B0-5094-01A-01R-1420-07	16.129	Tumor
TCGA-B8-4621-01A-01R-1503-07	11.0444	Tumor
TCGA-BQ-7060-01A-11R-1965-07	12.6392	Tumor
TCGA-BP-4784-01A-01R-1305-07	19.5133	Tumor
TCGA-CZ-5470-01A-01R-1503-07	14.7825	Tumor
TCGA-CZ-5462-01A-01R-1503-07	13.8486	Tumor
TCGA-KV-A6GD-01A-11R-A31O-07	13.6978	Tumor
TCGA-MM-A564-01A-11R-A266-07	13.3498	Tumor
TCGA-CZ-5465-01A-01R-1503-07	16.879	Tumor
TCGA-B0-5107-01A-01R-1420-07	20.0859	Tumor
TCGA-B1-5398-01A-02R-1592-07	18.9393	Tumor
TCGA-B4-5378-01A-01R-1503-07	19.2802	Tumor
TCGA-B0-4838-01A-01R-1305-07	21.7546	Tumor
TCGA-A4-8517-01A-11R-2404-07	14.3507	Tumor
TCGA-B0-4842-01A-02R-1420-07	13.3682	Tumor
TCGA-5P-A9K2-01A-11R-A42S-07	8.81335	Tumor
TCGA-B1-A656-01A-11R-A31O-07	13.4964	Tumor
TCGA-2K-A9WE-01A-11R-A38C-07	13.3243	Tumor
TCGA-CW-5590-01A-01R-1541-07	18.445	Tumor
TCGA-BP-4968-01A-01R-1334-07	14.9841	Tumor
TCGA-2Z-A9J2-01A-11R-A38C-07	12.1792	Tumor
TCGA-DZ-6135-01A-11R-1965-07	21.9205	Tumor
TCGA-B0-5088-01A-01R-1334-07	15.7195	Tumor
TCGA-CZ-5452-01A-01R-1503-07	16.9503	Tumor
TCGA-IZ-A6M8-01A-11R-A31O-07	12.6125	Tumor
TCGA-B0-5120-01A-01R-1420-07	16.2861	Tumor
TCGA-A4-7583-01A-11R-A32Z-07	20.9414	Tumor
TCGA-5P-A9K4-01A-11R-A42S-07	16.7388	Tumor
TCGA-AK-3455-01A-01R-0864-07	15.1027	Tumor
TCGA-BP-4983-01A-01R-1334-07	13.5577	Tumor
TCGA-BP-4787-01A-01R-1305-07	14.1758	Tumor
TCGA-A3-3383-01A-02R-1325-07	17.7457	Tumor
TCGA-AK-3456-01A-02R-1325-07	13.2527	Tumor
TCGA-IA-A83V-01A-11R-A355-07	16.5456	Tumor
TCGA-B2-3924-01B-03R-A277-07	11.5843	Tumor
TCGA-CJ-4900-01A-01R-1334-07	20.6979	Tumor
TCGA-B0-4845-01A-01R-1277-07	19.8543	Tumor
TCGA-AK-3445-01A-02R-1277-07	19.9093	Tumor
TCGA-A3-3358-01A-01R-1541-07	15.4167	Tumor
TCGA-CJ-4643-01A-02R-1325-07	18.3532	Tumor
TCGA-BQ-7062-01A-11R-1965-07	16.5939	Tumor
TCGA-A3-3313-01A-02R-1325-07	12.7562	Tumor
TCGA-HE-7128-01A-11R-1965-07	14.1031	Tumor
TCGA-A3-A8OV-01A-11R-A37O-07	17.7409	Tumor
TCGA-MW-A4EC-01A-11R-A266-07	22.1851	Tumor
TCGA-B0-4834-01A-01R-1305-07	12.1524	Tumor
TCGA-CW-6093-01A-11R-1672-07	22.0153	Tumor
TCGA-AL-3468-01A-02R-1351-07	15.4348	Tumor
TCGA-UZ-A9PU-01A-11R-A42S-07	14.5324	Tumor
TCGA-2Z-A9J7-01A-11R-A38C-07	16.5107	Tumor
TCGA-BQ-5876-01A-11R-1592-07	10.6123	Tumor
TCGA-BQ-7056-01A-11R-1965-07	13.443	Tumor
TCGA-BP-4761-01A-01R-1289-07	22.4078	Tumor
TCGA-5P-A9K8-01A-11R-A42S-07	12.8643	Tumor
TCGA-UZ-A9PP-01A-11R-A42S-07	18.9242	Tumor
TCGA-B0-4945-01A-01R-1420-07	19.123	Tumor
TCGA-CW-5581-01A-02R-1541-07	13.8937	Tumor
TCGA-A3-3387-01A-01R-1541-07	16.7337	Tumor
TCGA-B0-5081-01A-01R-1334-07	16.3232	Tumor
TCGA-AL-7173-01A-11R-2139-07	16.2679	Tumor
TCGA-EU-5907-01A-11R-1672-07	16.7035	Tumor
TCGA-BP-5170-01A-01R-1426-07	20.5122	Tumor
TCGA-BQ-7046-01A-11R-1965-07	13.0618	Tumor
TCGA-B2-4098-01A-02R-1325-07	14.4025	Tumor
TCGA-AK-3431-01A-02R-1277-07	23.1085	Tumor
TCGA-BP-4963-01A-01R-1334-07	15.6333	Tumor
TCGA-UZ-A9PO-01A-11R-A38C-07	10.8595	Tumor
TCGA-Y8-A897-01A-11R-A36F-07	13.553	Tumor
TCGA-CJ-4897-01A-03R-1426-07	13.719	Tumor
TCGA-UZ-A9PL-01A-11R-A38C-07	19.7075	Tumor
TCGA-AL-3467-01A-02R-1351-07	16.2383	Tumor
TCGA-CW-5580-01A-01R-1672-07	18.5461	Tumor
TCGA-B2-5635-01B-04R-A277-07	6.93102	Tumor
TCGA-BP-4962-01A-01R-1334-07	13.4788	Tumor
TCGA-G7-7502-01A-11R-2204-07	12.4133	Tumor
TCGA-BP-4330-01A-01R-1289-07	17.1312	Tumor
TCGA-B0-4811-01A-01R-1503-07	13.7575	Tumor
TCGA-A4-A48D-01A-11R-A24Z-07	12.7332	Tumor
TCGA-B0-5400-01A-01R-1503-07	14.5667	Tumor
TCGA-B8-A54D-01A-21R-A266-07	13.1549	Tumor
TCGA-BP-4969-01A-01R-1334-07	11.0714	Tumor
TCGA-BP-4985-01A-01R-1334-07	14.2139	Tumor
TCGA-UZ-A9PX-01A-11R-A42S-07	16.9719	Tumor
TCGA-B0-5100-01A-01R-1420-07	23.2274	Tumor
TCGA-CZ-5464-01A-01R-1503-07	13.4768	Tumor
TCGA-BQ-7049-01A-11R-1965-07	21.286	Tumor
TCGA-CZ-4865-01A-02R-1503-07	14.7349	Tumor
TCGA-B2-5633-01A-01R-A277-07	2.4176	Tumor
TCGA-AK-3425-01A-02R-1277-07	21.1475	Tumor
TCGA-BP-4167-01A-02R-1325-07	16.9658	Tumor
TCGA-2Z-A9JI-01A-11R-A42S-07	11.3584	Tumor
TCGA-AL-3473-01A-01R-1193-07	14.8689	Tumor
TCGA-BP-4338-01A-01R-1289-07	10.734	Tumor
TCGA-A4-7287-01A-11R-2139-07	19.3388	Tumor
TCGA-UZ-A9PN-01A-11R-A38C-07	22.974	Tumor
TCGA-BP-4799-01A-01R-1305-07	15.3681	Tumor
TCGA-B4-5834-01A-11R-1672-07	16.3611	Tumor
TCGA-CZ-4853-01A-01R-1426-07	15.9998	Tumor
TCGA-SX-A71S-01A-11R-A33Z-07	23.1196	Tumor
TCGA-O9-A75Z-01A-11R-A33Z-07	20.2734	Tumor
TCGA-G7-A8LC-01A-11R-A36F-07	20.1324	Tumor
TCGA-J7-6720-01A-11R-2139-07	14.1338	Tumor
TCGA-B0-5099-01A-01R-1420-07	22.2102	Tumor
TCGA-BP-4349-01A-01R-1289-07	20.8157	Tumor
TCGA-B0-5690-01A-11R-1541-07	21.3396	Tumor
TCGA-B0-4839-01A-01R-1305-07	17.612	Tumor
TCGA-B9-A5W8-01A-11R-A28H-07	21.1746	Tumor
TCGA-B0-4718-01A-01R-1277-07	25.2685	Tumor
TCGA-B0-5075-01A-01R-1334-07	12.4525	Tumor
TCGA-BP-5198-01A-01R-1426-07	18.7214	Tumor
TCGA-A3-3376-01A-02R-1420-07	20.3954	Tumor
TCGA-B8-A54I-01A-21R-A33J-07	16.6187	Tumor
TCGA-P4-A5EB-01A-11R-A28H-07	17.8758	Tumor
TCGA-DV-5575-01A-01R-1541-07	19.4308	Tumor
TCGA-A4-8311-01A-11R-2404-07	13.4425	Tumor
TCGA-BP-4770-01A-01R-1503-07	20.0989	Tumor
TCGA-B0-4846-01A-01R-1277-07	22.3692	Tumor
TCGA-GL-A4EM-01A-11R-A24Z-07	13.0429	Tumor
TCGA-DZ-6134-01A-11R-1965-07	16.4739	Tumor
TCGA-B0-4848-01A-01R-1277-07	23.0253	Tumor
TCGA-CW-5587-01A-01R-1541-07	17.2708	Tumor
TCGA-CJ-4638-01A-02R-1325-07	14.1478	Tumor
TCGA-BP-4345-01A-01R-1289-07	20.4026	Tumor
TCGA-F9-A97G-01A-11R-A38C-07	12.7559	Tumor
TCGA-B1-7332-01A-11R-A32Z-07	14.4064	Tumor
TCGA-B0-5106-01A-01R-1420-07	18.8859	Tumor
TCGA-BP-5195-01A-02R-1426-07	17.6709	Tumor
TCGA-CJ-4918-01A-01R-1426-07	16.8913	Tumor
TCGA-MH-A857-01A-11R-A355-07	10.3245	Tumor
TCGA-B1-A654-01A-11R-A31O-07	15.7985	Tumor
TCGA-B0-4690-01A-01R-1277-07	25.0774	Tumor
TCGA-BP-5182-01A-01R-1426-07	17.7628	Tumor
TCGA-BP-4762-01A-02R-1289-07	15.1991	Tumor
TCGA-BP-4176-01A-02R-1289-07	15.1281	Tumor
TCGA-BP-4169-01A-02R-1289-07	23.1198	Tumor
TCGA-BP-4760-01A-02R-1420-07	20.875	Tumor
TCGA-5P-A9KC-01A-11R-A42S-07	13.9863	Tumor
TCGA-A3-3374-01A-02R-1325-07	15.9595	Tumor
TCGA-BP-5191-01A-01R-1426-07	10.0285	Tumor
TCGA-B8-4619-01A-02R-1325-07	12.624	Tumor
TCGA-B0-4810-01A-01R-1503-07	21.426	Tumor
TCGA-B1-A47O-01A-11R-A24Z-07	12.2561	Tumor
TCGA-B2-3923-01A-02R-A277-07	5.69083	Tumor
TCGA-CW-5591-01A-01R-1541-07	18.477	Tumor
TCGA-BP-5201-01A-01R-1426-07	18.9792	Tumor
TCGA-AS-3777-01A-01R-0864-07	12.0488	Tumor
TCGA-BP-4758-01A-01R-1289-07	19.1799	Tumor
TCGA-B8-4620-01A-02R-1325-07	23.3016	Tumor
TCGA-2Z-A9J3-01A-12R-A38C-07	13.163	Tumor
TCGA-BP-4326-01A-01R-1289-07	22.3576	Tumor
TCGA-BQ-7055-01A-11R-1965-07	14.4117	Tumor
TCGA-B0-4852-01A-01R-1503-07	17.8053	Tumor
TCGA-B2-3923-01B-10R-A277-07	5.12034	Tumor
TCGA-B2-5633-01A-01R-1541-07	16.6029	Tumor
TCGA-B0-4844-01A-01R-1277-07	20.1198	Tumor
TCGA-BQ-5894-01A-11R-1592-07	27.4918	Tumor
TCGA-CJ-4887-01A-01R-1305-07	16.0759	Tumor
TCGA-5P-A9KH-01A-11R-A42S-07	15.136	Tumor
TCGA-G7-A8LD-01A-11R-A36F-07	23.2957	Tumor
TCGA-BQ-5885-01A-11R-1592-07	13.7545	Tumor
TCGA-BP-4332-01A-01R-1289-07	18.9567	Tumor
