# Supplementary material for: Sunitinib-suppressed miR-452-5p facilitates renal cancer cell invasion and metastasis through modulating SMAD4/SMAD7 signals
Source: Mol Cancer. 2018 Nov 12;17:157. doi: 10.1186/s12943-018-0906-x (PMC6231268; doi:10.1186/s12943-018-0906-x)
Supplement: Supplementary file 10 — Table S10. P65 expression in different TNM stage of RCC samples from TCGA RCC dataset. (XLSX 40 kb) [file 12943_2018_906_MOESM10_ESM.xlsx]

## Sheet: Sheet1
Table S10. P65 expression and patients' survival time from RCC TCGA dataset
id	futime	fustat	P65
TCGA-AK-3451	7.85753	0	10.4484
TCGA-CZ-5464	5.83014	0	13.4768
TCGA-A3-3376	4.64658	1	20.3954
TCGA-A4-A4ZT	1.4137	0	14.4454
TCGA-CJ-4918	0.254795	1	16.8913
TCGA-B3-8121	1.03836	0	16.0259
TCGA-CJ-4920	0.380822	1	20.4184
TCGA-B0-4849	0.189041	1	24.1032
TCGA-A4-8630	1.19452	0	13.8837
TCGA-5P-A9K0	1.85479	0	14.1105
TCGA-DV-5576	1.99178	1	19.3416
TCGA-2Z-A9J7	0.380822	1	16.5107
TCGA-SX-A71R	3.99178	0	12.0656
TCGA-P4-A5E8	3.57808	1	19.0416
TCGA-B0-5701	6.74247	0	15.322
TCGA-A3-3380	1.55342	0	17.2573
TCGA-DV-5575	4.73699	0	19.4308
TCGA-CZ-4860	0.564384	1	22.4867
TCGA-4A-A93X	1.06849	0	11.1916
TCGA-B0-5116	3.49041	0	16.4546
TCGA-BP-4354	2.83288	1	17.6938
TCGA-CJ-4889	5.33151	0	17.37
TCGA-B9-A44B	0.989041	0	13.5926
TCGA-UZ-A9PL	8.63562	0	19.7075
TCGA-B8-4153	2.08767	0	21.0769
TCGA-A3-3372	2.0137	0	21.4808
TCGA-B0-5097	1.82192	0	18.6491
TCGA-A3-3373	4.4411	0	17.7794
TCGA-J7-8537	0.879452	1	9.36328
TCGA-BP-4999	3.46849	0	15.9869
TCGA-Y8-A8S0	0.50137	0	16.966
TCGA-BP-5189	2.25205	1	15.3846
TCGA-MW-A4EC	1.36438	0	22.1851
TCGA-CZ-5456	6.63562	0	13.2489
TCGA-BP-4345	4.15342	0	20.4026
TCGA-IA-A40X	1.66575	0	18.1402
TCGA-MM-A563	1.61918	0	18.8261
TCGA-EV-5901	2.84932	0	22.6963
TCGA-CJ-4884	4.81918	0	12.7561
TCGA-CJ-4912	4.53973	0	15.9854
TCGA-CJ-4887	2.55342	1	16.0759
TCGA-B8-A54I	0.410959	0	16.6187
TCGA-CZ-5467	0.2	1	20.4557
TCGA-BP-4344	4.56438	0	18.5596
TCGA-AL-3473	5.22192	0	14.8689
TCGA-CJ-4908	4.19452	0	18.2109
TCGA-CZ-4857	3.92329	1	14.843
TCGA-HE-7130	4.84932	0	21.5979
TCGA-UZ-A9PM	10.4411	0	15.1428
TCGA-BP-4160	7.89315	0	14.0438
TCGA-BP-4349	1.01918	0	20.8157
TCGA-B0-4823	1.24384	1	20.801
TCGA-B2-4102	2.60822	0	16.3713
TCGA-A4-7828	0.652055	0	20.8487
TCGA-A3-3313	2.0137	1	12.7562
TCGA-BQ-5877	0.739726	1	21.2736
TCGA-BP-4976	4.47123	0	15.1257
TCGA-BP-5174	6.18356	0	14.9333
TCGA-B0-5109	1.60822	1	15.674
TCGA-CZ-5463	1.8137	0	12.8861
TCGA-CJ-5678	1.5726	1	13.8694
TCGA-B2-4101	1.77534	0	17.8879
TCGA-Y8-A898	1.30137	0	15.033
TCGA-BP-5201	2.60548	0	18.9792
TCGA-UZ-A9PN	3.11233	1	22.974
TCGA-F9-A8NY	0.0986301	0	17.9815
TCGA-BP-5194	1.11781	0	14.3732
TCGA-EV-5903	2.07397	0	18.2194
TCGA-CJ-5683	5.17534	0	19.8777
TCGA-BP-4774	5.16438	0	24.8027
TCGA-BP-4758	6.04932	0	19.1799
TCGA-SX-A7SS	4.42466	0	8.53451
TCGA-Y8-A896	1.55342	0	14.7685
TCGA-B0-4697	1.58356	1	22.5922
TCGA-BQ-5890	0.638356	0	15.8248
TCGA-G7-A4TM	2.10411	0	19.4393
TCGA-BP-4165	8.32055	0	21.4681
TCGA-BP-4762	3.67945	1	15.1991
TCGA-BP-5001	3.22466	0	15.7853
TCGA-A3-3385	5.46027	0	11.3996
TCGA-B0-4827	2.42466	1	20.5399
TCGA-CZ-5987	1.21918	1	21.3778
TCGA-A3-A8OW	0.884932	0	16.5766
TCGA-AL-7173	5.64384	0	16.2679
TCGA-BP-4974	0.578082	1	20.8505
TCGA-G7-6796	5.95342	0	16.7411
TCGA-B0-5108	4.88219	0	17.6266
TCGA-BP-4330	5.1726	0	17.1312
TCGA-AK-3425	9.1589	0	21.1475
TCGA-2Z-A9JE	4.73425	0	15.7925
TCGA-A3-A6NL	1.88767	0	20.3276
TCGA-B0-5083	2.86301	1	15.0559
TCGA-B8-4146	1.4	0	5.14389
TCGA-B8-5163	2.25205	0	16.6783
TCGA-AS-3777	3.39178	0	12.0488
TCGA-F9-A7VF	0.2	0	14.112
TCGA-CJ-5675	10.7836	0	22.3882
TCGA-CJ-4886	5.34795	0	16.3557
TCGA-IA-A40U	1.4	0	15.3917
TCGA-DZ-6133	4.26575	1	13.0131
TCGA-CJ-6027	9.90411	1	22.3108
TCGA-BP-5008	2.93425	0	18.8417
TCGA-A3-3316	4.09041	0	12.9539
TCGA-CW-5581	7.66849	0	13.8937
TCGA-J7-6720	1.06301	0	14.1338
TCGA-DV-A4W0	6.76712	0	20.1889
TCGA-CW-6093	8.61918	0	22.0153
TCGA-AS-3778	0.117808	0	19.9961
TCGA-BQ-5880	3.6	1	11.5246
TCGA-CW-5591	6.22192	0	18.477
TCGA-B0-4694	0.290411	1	17.3208
TCGA-B0-5113	3.21918	0	18.0929
TCGA-CJ-4903	4.27123	0	15.5577
TCGA-B1-7332	3.12603	0	14.4064
TCGA-BP-4991	3.87123	0	15.1713
TCGA-BP-4970	1.1863	0	17.6171
TCGA-MH-A560	2.53151	0	11.0913
TCGA-2Z-A9J9	6.28493	0	21.5419
TCGA-UZ-A9PP	8.24658	0	18.9242
TCGA-2Z-A9JM	2.5589	0	14.6483
TCGA-B0-4703	0.49863	1	18.6404
TCGA-B0-5695	5.89041	0	20.3541
TCGA-BP-4352	0.942466	1	18.0201
TCGA-T7-A92I	0.975342	0	15.5182
TCGA-B0-5107	2.53973	1	20.0859
TCGA-A3-3322	4.04932	0	17.3059
TCGA-BP-4982	2.77808	0	16.2202
TCGA-2Z-A9J5	8.35616	0	11.5907
TCGA-Y8-A897	1.50411	0	13.553
TCGA-2Z-A9JJ	3.32329	0	17.8298
TCGA-B0-5400	4.74795	0	14.5667
TCGA-GL-7773	1.07671	0	20.3714
TCGA-CJ-4893	2.05479	0	15.8836
TCGA-BQ-7051	4.2	0	16.6734
TCGA-G7-6795	3.27123	0	10.1699
TCGA-P4-A5E6	8.31507	0	14.9716
TCGA-DW-5560	4.07123	0	15.9917
TCGA-A3-3311	3.26301	1	18.8359
TCGA-MM-A84U	1.91781	0	14.8924
TCGA-A3-3320	4.13151	0	17.8971
TCGA-BP-4765	5.98356	0	19.5643
TCGA-B0-5077	3.60822	1	14.9404
TCGA-BP-4797	3.03288	0	13.9906
TCGA-B0-4690	0.117808	1	25.0774
TCGA-CJ-5677	2.14247	1	18.2873
TCGA-CZ-5457	7.54521	0	14.895
TCGA-BP-5169	0.528767	0	14.9755
TCGA-B0-5104	7.53973	1	24.2792
TCGA-BP-5186	1.89863	0	18.9273
TCGA-AT-A5NU	0.183562	0	14.1545
TCGA-AK-3428	10.2137	0	30.1627
TCGA-GL-A4EM	0.0876712	0	13.0429
TCGA-BP-5198	1.65205	0	18.7214
TCGA-A3-A8OU	0	0	23.5407
TCGA-V9-A7HT	2.64384	0	13.802
TCGA-BP-4177	4.57534	0	20.9435
TCGA-BP-4961	5.30137	0	16.8485
TCGA-B3-3925	2.81918	0	15.2204
TCGA-P4-AAVO	6.57534	0	11.2126
TCGA-BQ-7056	1.67671	0	13.443
TCGA-B8-4143	1.94247	1	21.491
TCGA-BP-4967	0.561644	0	12.7332
TCGA-CW-5585	7.14795	0	18.9807
TCGA-B0-5095	0.671233	1	19.0573
TCGA-CJ-4892	4.16712	0	17.8572
TCGA-B4-5843	0.030137	0	15.2237
TCGA-BP-5180	6.2	0	19.3388
TCGA-BQ-7049	3.73699	1	21.286
TCGA-BP-4992	1.3726	0	15.7631
TCGA-CJ-4874	6.25479	0	14.3524
TCGA-BP-4993	0.484932	0	23.8267
TCGA-BP-5191	2.64932	0	10.0285
TCGA-5P-A9KA	1.08219	0	16.9257
TCGA-A4-7583	0.00821918	0	20.9414
TCGA-B0-4848	2.41918	1	23.0253
TCGA-UZ-A9PX	5.4274	0	16.9719
TCGA-B0-4838	2.28493	1	21.7546
TCGA-CJ-4897	9.15342	0	13.719
TCGA-UZ-A9PQ	7.18904	1	18.9717
TCGA-B3-3926	2.41918	0	16.0358
TCGA-F9-A7Q0	1.09041	0	21.7764
TCGA-B8-4620	2.12877	0	23.3016
TCGA-EU-5905	0.326027	0	14.6649
TCGA-SX-A71S	4.12055	0	23.1196
TCGA-B0-5699	10.5233	0	20.377
TCGA-B8-4619	1.43288	0	12.624
TCGA-SX-A71V	2.4	0	10.0853
TCGA-BP-4799	3.10411	1	15.3681
TCGA-B3-4104	2.87397	0	21.2192
TCGA-2K-A9WE	0.586301	0	13.3243
TCGA-B8-A54E	2.49041	0	8.60918
TCGA-UZ-A9PO	5.23562	0	10.8595
TCGA-A3-3325	3.20548	1	19.5584
TCGA-BP-5178	5.23836	1	17.3617
TCGA-B8-5162	0.0986301	0	19.3655
TCGA-B0-4828	0.841096	1	18.5476
TCGA-2Z-A9JQ	2.13151	0	14.564
TCGA-AK-3434	5.71781	0	19.7747
TCGA-CZ-4862	8.96164	0	15.932
TCGA-SX-A71U	3.71781	0	13.7186
TCGA-A4-A5DU	1.3589	0	12.4121
TCGA-BP-4968	4.78356	0	14.9841
TCGA-BP-4969	4.91507	0	11.0714
TCGA-BP-4963	5.02466	0	15.6333
TCGA-BP-4760	6.46849	0	20.875
TCGA-DZ-6132	6.73973	0	17.2345
TCGA-A3-A6NJ	1.28219	0	23.5035
TCGA-DW-7841	1.21918	0	17.2579
TCGA-BP-5176	4.35616	1	24.0533
TCGA-CJ-4869	6.99726	0	19.001
TCGA-B0-5713	7.62192	0	17.4187
TCGA-B1-A47O	2.30685	0	12.2561
TCGA-CZ-5984	5.66301	0	17.6509
TCGA-B0-4713	0.553425	1	10.4447
TCGA-A3-A8OX	0	0	15.1254
TCGA-BP-4355	2.61096	1	22.3042
TCGA-P4-AAVL	1.33425	1	19.1066
TCGA-CJ-4638	1.18082	1	14.1478
TCGA-BQ-7060	0.586301	0	12.6392
TCGA-CZ-4854	3.84658	1	13.3608
TCGA-BP-5195	2.05205	0	17.6709
TCGA-A3-3329	4.44932	0	16.104
TCGA-P4-A5EA	0.550685	1	18.2414
TCGA-CJ-4634	9.58356	0	17.2242
TCGA-BP-4795	1.69863	0	21.8763
TCGA-B0-4843	0.876712	1	15.4436
TCGA-BP-4343	5.23836	1	10.97
TCGA-A4-8517	1.63562	0	14.3507
TCGA-B9-A8YH	1.45753	0	15.1246
TCGA-B9-4115	2.2	0	14.9303
TCGA-HE-A5NL	2.10137	0	13.0685
TCGA-B0-4836	3.39178	1	17.5651
TCGA-B4-5835	0.0438356	0	15.0503
TCGA-AK-3427	9.81644	0	11.0241
TCGA-A4-7732	1.59452	0	14.8607
TCGA-A3-3378	1.72603	0	16.3686
TCGA-AL-3472	5.5589	0	16.059
TCGA-BP-5192	1.95616	0	16.6831
TCGA-A4-A48D	1.03836	0	12.7332
TCGA-DW-7839	1.14795	0	16.0931
TCGA-WN-A9G9	2.16712	0	14.6156
TCGA-A3-3328	3.79452	0	19.8844
TCGA-CW-5590	2.94521	1	18.445
TCGA-B2-5639	2.74795	1	20.2547
TCGA-SX-A7SL	2.25479	0	12.7625
TCGA-BP-4807	0.578082	0	14.5141
TCGA-CW-5583	6.81918	0	15.695
TCGA-BP-4987	3.07945	0	16.282
TCGA-5P-A9KC	1.03288	0	13.9863
TCGA-A3-3346	0.375342	1	16.2136
TCGA-CZ-5458	7.6411	0	14.2674
TCGA-A3-A6NI	2.78904	0	20.2267
TCGA-BQ-7044	10.3014	0	8.01287
TCGA-B2-5633	2.63836	0	16.6029
TCGA-BP-4787	1.31507	1	14.1758
TCGA-BP-4159	7.12603	1	15.9278
TCGA-A4-7734	0.0739726	0	18.9818
TCGA-BP-5196	2.78904	0	19.1763
TCGA-CW-5584	0.449315	1	20.9916
TCGA-DV-5565	3.6411	0	25.0059
TCGA-3Z-A93Z	1.05479	0	18.4487
TCGA-G6-A5PC	0.663014	1	12.9571
TCGA-AL-3471	4.10959	1	9.46417
TCGA-Y8-A8RY	2.10685	0	15.4651
TCGA-CJ-4868	1.76986	1	17.7174
TCGA-B9-A69E	1.23836	0	14.7802
TCGA-G7-A8LC	1.92329	0	20.1324
TCGA-B0-5696	7.14795	0	16.3324
TCGA-B0-5402	3.53425	0	12.4019
TCGA-UZ-A9PK	9.78356	0	16.2147
TCGA-BP-4986	2.15068	0	16.4488
TCGA-KV-A6GE	2.42466	0	10.0644
TCGA-CW-5587	6.09863	0	17.2708
TCGA-BQ-5888	1.10411	0	15.399
TCGA-BQ-7050	5.10685	0	13.3638
TCGA-B8-A54F	1.42192	0	17.4832
TCGA-SX-A71W	2.94795	0	15.1021
TCGA-BP-4784	5.07945	0	19.5133
TCGA-BQ-7046	8.07671	0	13.0618
TCGA-BP-4798	0.915068	1	16.9112
TCGA-B0-5094	0.912329	1	16.129
TCGA-DV-5567	5.49041	0	19.5848
TCGA-AK-3454	2.39452	0	15.278
TCGA-BP-4998	2.55342	0	15.5783
TCGA-BP-4161	7.52329	0	17.6534
TCGA-B2-4098	0.139726	1	14.4025
TCGA-B0-4834	5.72603	1	12.1524
TCGA-BP-5004	3.08493	0	16.2685
TCGA-B2-5636	2.51781	0	20.576
TCGA-CW-6087	0.112329	1	19.9584
TCGA-B0-5712	7.45753	0	16.2237
TCGA-CZ-5470	1.05753	0	14.7825
TCGA-A4-A6HP	1.03836	0	13.5372
TCGA-A4-8311	1.99726	0	13.4425
TCGA-CZ-5451	5.28493	0	17.2853
TCGA-6D-AA2E	0.991781	0	10.8978
TCGA-BP-4166	0.0356164	0	15.9645
TCGA-CZ-5452	4.90137	0	16.9503
TCGA-MH-A854	1.46849	0	18.2781
TCGA-A3-3365	2.39178	0	20.8664
TCGA-HE-A5NK	6.10411	0	16.6768
TCGA-B9-5156	3.66575	0	16.3181
TCGA-G6-A8L7	5.84384	0	11.8847
TCGA-MH-A562	1.68767	0	14.429
TCGA-B0-4833	6.53699	1	18.3622
TCGA-B0-5075	1.74521	1	12.4525
TCGA-CJ-5672	6	1	17.0758
TCGA-A3-3357	7.36438	0	12.4553
TCGA-B0-4710	4.80822	0	28.134
TCGA-B8-5550	4.04384	0	14.6998
TCGA-B0-5690	9.29315	0	21.3396
TCGA-BP-4326	4.45205	1	22.3576
TCGA-B0-4839	4.49041	1	17.612
TCGA-CJ-4885	9.45479	0	21.7432
TCGA-GL-7966	0.306849	0	21.4231
TCGA-CJ-4891	2.24384	1	20.3115
TCGA-BP-4334	1.76712	1	22.9807
TCGA-B0-4822	3.04384	1	15.406
TCGA-CZ-5468	0.161644	1	15.6853
TCGA-2Z-A9J3	4.85205	1	13.163
TCGA-BP-4973	3.79178	0	14.2159
TCGA-BQ-7045	4.02192	1	20.7851
TCGA-B0-4814	0.460274	1	17.3328
TCGA-BQ-7058	0.939726	1	10.2499
TCGA-BP-4346	4.09041	1	19.2957
TCGA-HE-7129	6.8274	0	18.078
TCGA-Y8-A895	1.32603	0	13.0662
TCGA-B2-4099	2.66301	0	21.6119
TCGA-A3-A8OV	0.931507	0	17.7409
TCGA-B0-4688	0.276712	1	21.1275
TCGA-B2-3923	2.71781	0	5.12034
TCGA-CW-5589	6.51507	0	17.6115
TCGA-A4-7997	2.53973	0	12.9026
TCGA-BP-5185	3.10137	0	11.4079
TCGA-A3-3351	2.49315	0	18.9356
TCGA-B0-4810	1.30959	1	21.426
TCGA-GL-A9DE	1.3589	0	16.3318
TCGA-A4-A5Y1	1.08219	1	23.5888
TCGA-BP-4965	5.12603	0	15.5889
TCGA-BQ-5882	1.80274	1	10.1644
TCGA-DW-7837	3.12877	0	16.1259
TCGA-UZ-A9PV	3.95616	0	15.0762
TCGA-B0-4842	4.72329	1	13.3682
TCGA-BP-4771	0.443836	1	19.788
TCGA-2Z-A9JG	4.55342	0	12.7558
TCGA-CJ-4644	0.920548	1	16.0324
TCGA-B8-5165	2.01918	0	15.2189
TCGA-B0-5709	10.8877	0	20.1799
TCGA-B0-4945	5.87671	1	19.123
TCGA-SX-A7SM	0.994521	1	21.0587
TCGA-B0-5812	10.5041	0	19.019
TCGA-BQ-5878	5.30959	0	17.107
TCGA-5P-A9K8	3.5863	0	12.8643
TCGA-BP-4158	9.25205	0	15.4326
TCGA-B0-4844	0.857534	1	20.1198
TCGA-B0-4845	5.4411	1	19.8543
TCGA-EV-5902	1.58356	0	18.3177
TCGA-DW-7838	2.03836	0	17.3773
TCGA-GL-8500	2.30411	0	13.6045
TCGA-BQ-5875	7.23014	0	12.0647
TCGA-A4-A5XZ	1.31233	0	10.583
TCGA-B0-4699	0.30137	1	19.5126
TCGA-CJ-4894	2.30411	1	17.2228
TCGA-UN-AAZ9	1.50137	0	18.3256
TCGA-A4-7585	2.93151	1	12.0629
TCGA-CZ-5460	7.87123	0	16.1211
TCGA-BP-4164	2.71781	1	17.5828
TCGA-MH-A856	2.59452	0	17.3609
TCGA-B8-A54D	2.27397	0	13.1549
TCGA-5P-A9K9	1.6137	1	10.3006
TCGA-B9-A5W8	1.43562	0	21.1746
TCGA-DW-5561	1.13425	0	14.3727
TCGA-BP-4995	3.75616	0	13.9428
TCGA-KV-A6GD	1.53425	0	13.6978
TCGA-AK-3433	9.33973	0	14.6354
TCGA-A3-3335	5.16712	0	21.585
TCGA-CZ-5982	6.68219	0	22.6927
TCGA-DV-5574	5.52329	0	15.4485
TCGA-B2-5641	1.79726	0	13.4953
TCGA-B9-4117	0.0383562	0	17.0107
TCGA-BP-4975	3.92603	0	15.3763
TCGA-2Z-A9JS	1.34795	1	16.1172
TCGA-B8-5545	4.17808	0	18.2574
TCGA-HE-A5NF	7.07397	0	11.9019
TCGA-BP-5170	6.60822	0	20.5122
TCGA-DW-7842	0.252055	0	20.8914
TCGA-B4-5836	0.386301	0	17.4612
TCGA-G7-A8LB	1.49863	0	9.36291
TCGA-BP-4162	8.42192	0	15.9485
TCGA-A4-7996	1.3863	0	12.0859
TCGA-CJ-4905	4.09863	0	18.7107
TCGA-BP-5184	3.10411	0	18.745
TCGA-CJ-4878	5.98904	0	28.0806
TCGA-2Z-A9JO	2.6	0	8.99108
TCGA-BP-4768	1.09589	0	15.4144
TCGA-HE-A5NI	0.986301	0	9.02852
TCGA-5P-A9JY	4.13151	1	14.0912
TCGA-5P-A9JZ	7.51781	0	17.77
TCGA-UZ-A9PZ	1.8	0	13.1692
TCGA-BQ-7062	0.317808	0	16.5939
TCGA-BP-4340	1.53973	1	17.8357
TCGA-B4-5377	1	0	21.413
TCGA-A4-A7UZ	0	0	15.8733
TCGA-CZ-4859	4.89589	0	17.6527
TCGA-AL-3467	5.84932	0	16.2383
TCGA-B9-5155	1.82192	0	17.2403
TCGA-A4-A772	0	0	15.3066
TCGA-B1-A655	1.39726	0	11.5795
TCGA-CZ-5986	1.02192	0	16.113
TCGA-B0-4818	1.39726	1	26.7949
TCGA-BP-4766	4.00548	0	19.1046
TCGA-BP-5202	0.0794521	0	20.1848
TCGA-G7-7502	2.15342	0	12.4133
TCGA-BP-4983	3.87123	0	13.5577
TCGA-BP-4342	6.18082	1	17.7551
TCGA-B0-5702	5.95068	0	12.0746
TCGA-G7-6792	7.57534	0	23.5616
TCGA-DV-5573	3.09589	0	18.7759
TCGA-BP-5181	4.09589	0	18.0121
TCGA-CJ-4872	0.893151	0	18.8445
TCGA-B0-5692	10.8055	0	22.5367
TCGA-P4-A5EB	8.26027	0	17.8758
TCGA-AK-3429	9.11781	0	15.8557
TCGA-B0-4701	0.652055	1	25.9976
TCGA-SX-A7SR	2.20548	0	13.0086
TCGA-A3-3324	3.24932	0	15.9943
TCGA-G6-A8L8	2.98904	1	23.0058
TCGA-CJ-4641	4.55068	1	16.4649
TCGA-B8-5553	1.19178	0	21.8171
TCGA-BP-4759	6.49863	0	16.9794
TCGA-IZ-8195	1.85479	0	8.17618
TCGA-BP-4962	4.89041	0	13.4788
TCGA-BP-4163	7.77808	0	17.3473
TCGA-5P-A9K4	5.98356	0	16.7388
TCGA-5P-A9KF	2.31507	0	13.2576
TCGA-BP-4769	5.13973	0	22.9708
TCGA-BP-4756	1.02466	0	11.6332
TCGA-AL-A5DJ	4.10411	1	16.6546
TCGA-A3-3374	3.6	0	15.9595
TCGA-BP-5173	0.169863	1	12.972
TCGA-BP-4989	0.323288	0	14.6257
TCGA-BP-4329	2.31507	1	19.03
TCGA-B0-5693	11.1616	0	22.8303
TCGA-DZ-6135	6.21644	0	21.9205
TCGA-BP-4964	5.10137	0	13.1366
TCGA-CJ-4870	4.10411	0	21.5234
TCGA-2Z-A9JI	4.29315	0	11.3584
TCGA-CJ-6030	6.29863	1	17.3699
TCGA-B9-A8YI	1.02466	0	10.1123
TCGA-B0-4712	3.66301	1	18.418
TCGA-G7-6797	2.09589	0	16.1515
TCGA-CZ-5454	1.97808	1	15.0312
TCGA-BP-4801	3.07945	0	17.5183
TCGA-EU-5904	1.50959	0	16.8483
TCGA-A3-3370	6.23014	0	17.1138
TCGA-SX-A7SN	1.58356	0	15.6134
TCGA-B0-4816	3.75616	1	19.5665
TCGA-B8-5546	1.38356	0	11.4274
TCGA-B0-5088	1.54247	1	15.7195
TCGA-BP-4173	5.1863	0	24.1974
TCGA-BP-4994	3.58356	0	14.6923
TCGA-B8-5551	0.0438356	0	19.6016
TCGA-AK-3461	6.07397	0	24.916
TCGA-BQ-5885	2.52329	0	13.7545
TCGA-MH-A55Z	2.31507	0	14.5515
TCGA-IZ-8196	1.77808	0	15.8642
TCGA-B9-A5W9	0.0136986	0	16.8481
TCGA-B0-4837	3.77534	1	15.6531
TCGA-CJ-4904	9.04658	0	19.7372
TCGA-CJ-4895	3.28767	1	19.7332
TCGA-5P-A9KH	5.61918	0	15.136
TCGA-BP-5175	2.55342	0	10.2803
TCGA-CZ-4856	0.0493151	0	15.3435
TCGA-AK-3440	7.84932	0	23.3193
TCGA-CZ-4864	7.75342	1	17.5989
TCGA-B8-5159	1.97808	0	14.6313
TCGA-BQ-7053	4.15342	0	16.4888
TCGA-MM-A564	1.66301	0	13.3498
TCGA-CJ-4636	5.27123	0	13.6742
TCGA-SX-A7SU	3.64658	0	21.2332
TCGA-B0-4852	3.07123	1	17.8053
TCGA-BQ-5879	1.90959	1	23.2733
TCGA-A3-3308	0.0438356	0	19.0889
TCGA-AK-3458	3.2	0	10.3972
TCGA-BP-4347	3.74521	0	18.3984
TCGA-P4-A5ED	7.71507	0	18.1967
TCGA-B4-5834	0.0712329	0	16.3611
TCGA-B0-5120	3.20274	0	16.2861
TCGA-DW-7836	2.99452	0	18.1594
TCGA-A3-3347	4.41096	1	17.1192
TCGA-HE-A5NH	2.16712	0	17.0372
TCGA-B0-5705	12.4301	0	16.3935
TCGA-CJ-5686	5.58356	0	18.124
TCGA-A3-3349	3.79452	0	21.0747
TCGA-A3-A8CQ	0.00821918	0	21.5775
TCGA-A3-3306	3.06849	0	17.8811
TCGA-2Z-A9JP	2.44658	0	11.129
TCGA-BP-4351	2.65753	0	16.2443
TCGA-BP-4338	7.83288	0	10.734
TCGA-UZ-A9PU	2.55616	1	14.5324
TCGA-CJ-4916	3.76164	0	17.5674
TCGA-AK-3455	1.87123	1	15.1027
TCGA-B8-A54H	0.70137	0	19.5133
TCGA-SX-A7SQ	3.46849	0	16.3059
TCGA-BP-5007	3.12329	0	14.1497
TCGA-A3-3359	6.86027	0	19.4419
TCGA-GL-A9DD	0.934247	0	11.5471
TCGA-B0-4811	3.88219	1	13.7575
TCGA-BP-4174	5.14795	0	14.6133
TCGA-BQ-5891	0.0794521	0	14.8809
TCGA-IA-A40Y	0.169863	0	14.4537
TCGA-G6-A8L6	0.857534	1	20.5107
TCGA-BP-4775	5.04932	0	17.0638
TCGA-B8-4621	2.1589	0	11.0444
TCGA-BP-4325	8.12055	0	15.6151
TCGA-BP-5190	2.76986	0	14.1005
TCGA-B8-4148	4.16438	0	24.0133
TCGA-B8-A8YJ	1.18082	0	25.3255
TCGA-B0-5098	4.33973	1	24.095
TCGA-2Z-A9JT	1.87397	0	11.2339
TCGA-5P-A9JV	5.59726	0	15.4843
TCGA-CZ-5465	7.02466	1	16.879
TCGA-CZ-4866	8.95068	0	10.8957
TCGA-SX-A7SO	3.44384	0	11.2309
TCGA-B0-5121	4.06849	0	15.3688
TCGA-DZ-6134	5.08493	0	16.4739
TCGA-BP-5200	2.91233	0	24.5489
TCGA-CJ-5680	2.10411	1	18.6577
TCGA-G7-6790	4.31507	0	14.1033
TCGA-B0-4706	0.178082	1	19.676
TCGA-UZ-A9Q1	4.27945	0	9.29693
TCGA-BP-4959	7.28767	0	15.9629
TCGA-5P-A9K2	6.55342	0	8.81335
TCGA-Y8-A894	1.55342	0	21.5053
TCGA-P4-AAVM	4.21644	0	10.9295
TCGA-2Z-A9JN	2.0274	0	11.9992
TCGA-B8-5158	3.33699	0	15.8764
TCGA-CJ-4637	6.10137	1	19.5828
TCGA-BP-4985	2.60822	1	14.2139
TCGA-SX-A7SP	1.3589	1	13.8465
TCGA-CJ-5671	10.9233	0	18.5447
TCGA-CJ-4902	4.16438	0	17.7853
TCGA-A4-8518	1.64384	0	8.86593
TCGA-BQ-5886	2.16986	0	8.01588
TCGA-CZ-5985	5.47123	0	14.887
TCGA-CZ-5459	4.61096	0	14.5672
TCGA-UZ-A9PJ	2.18356	1	16.512
TCGA-B0-5706	8.78082	0	17.8958
TCGA-B0-4841	0.558904	1	16.8895
TCGA-B0-5084	0.608219	1	11.3423
TCGA-B0-5099	1.32877	1	22.2102
TCGA-B8-A7U6	1.35616	0	27.5287
TCGA-B4-5832	0.424658	0	3.04259
TCGA-A3-3326	3.11507	0	16.6448
TCGA-A3-3319	3.09589	0	19.2875
TCGA-F9-A4JJ	0.890411	1	28.1885
TCGA-Y8-A8S1	1.10685	0	18.5742
TCGA-BP-4167	7.44658	0	16.9658
TCGA-B0-5100	5.2411	1	23.2274
TCGA-B0-4693	0.210959	1	18.593
TCGA-BP-4782	0.969863	0	15.9046
TCGA-P4-AAVK	4.35616	0	12.3555
TCGA-4A-A93W	0.0109589	0	16.8412
TCGA-MH-A55W	2.85753	0	12.3962
TCGA-CJ-4635	3.87945	0	18.6817
TCGA-G7-6789	0.334247	1	15.8762
TCGA-BP-4972	4.11507	0	14.8528
TCGA-CJ-5676	11.1425	0	17.5902
TCGA-CW-6090	6.99178	0	19.0073
TCGA-B0-5115	4.39452	0	19.8554
TCGA-BP-4971	4.07397	0	15.8179
TCGA-BP-5010	2.40548	1	17.2454
TCGA-BP-4341	4.35342	1	19.9896
TCGA-A3-3363	0.873973	0	16.285
TCGA-A3-A6NN	0.00821918	0	18.6283
TCGA-CJ-4873	6.18904	0	14.9164
TCGA-BQ-5883	3.40274	0	13.0816
TCGA-CJ-4907	4.10685	0	17.5865
TCGA-CJ-6031	5.22192	0	14.4296
TCGA-GL-6846	16.2329	0	16.1954
TCGA-CZ-5461	0.90411	1	15.9646
TCGA-KV-A74V	0.950685	0	11.1827
TCGA-CW-6088	8.8274	0	17.9691
TCGA-B0-5707	10.2575	0	14.6785
TCGA-CJ-6028	4.45205	1	18.174
TCGA-DV-5566	3.83014	0	20.8583
TCGA-CW-6097	1.56438	1	16.9232
TCGA-B3-A6W5	0.846575	0	12.1598
TCGA-BP-4327	0.29863	1	20.5997
TCGA-B2-5635	2.06849	0	6.93102
TCGA-BP-4331	6.72329	1	23.5997
TCGA-UZ-A9PR	7.19726	0	20.9054
TCGA-BP-4803	0.558904	0	15.7841
TCGA-AK-3445	6.55342	0	19.9093
TCGA-BP-4804	3.99726	0	17.2576
TCGA-B2-A4SR	1.38904	0	16.5789
TCGA-CJ-5679	1.86027	1	16.3911
TCGA-BP-5000	1.54247	0	15.3768
TCGA-CJ-4888	4.29315	1	19.7388
TCGA-B8-A54J	1.44658	0	21.8893
TCGA-BQ-5884	2.16986	0	13.1359
TCGA-B0-5697	7.20548	0	15.8907
TCGA-DW-7834	10.8219	0	24.1246
TCGA-AK-3450	4.87397	0	18.4939
TCGA-BQ-5889	0.90137	1	17.2841
TCGA-BP-5009	2.99178	1	14.3798
TCGA-PJ-A5Z8	1.64384	0	15.4152
TCGA-B1-A656	1.69315	0	13.4964
TCGA-B0-5119	4.25205	0	17.8647
TCGA-CZ-5988	1.89863	0	13.9704
TCGA-B0-5703	6.15342	0	18.4679
TCGA-B0-5711	10.9288	0	16.2891
TCGA-CJ-4875	9.73699	1	12.9743
TCGA-BQ-5876	1.60548	0	10.6123
TCGA-BP-4981	3.00548	1	16.9446
TCGA-4A-A93Y	0.964384	0	16.0723
TCGA-B8-5549	0.531507	0	15.7408
TCGA-BP-4335	1.30137	1	16.6792
TCGA-GL-A9DC	1.07397	0	17.3549
TCGA-2Z-A9J8	7.64384	0	12.8774
TCGA-BP-4790	3.04384	1	18.0437
TCGA-HE-A5NJ	4.72877	0	16.1189
TCGA-B0-5096	0.186301	1	17.2067
TCGA-BP-5177	0.80274	0	17.4677
TCGA-BQ-5881	3.98356	0	8.52508
TCGA-A3-3367	6.21918	0	15.0951
TCGA-BP-4170	6.41918	1	17.6574
TCGA-BQ-7059	0.635616	0	17.9818
TCGA-5P-A9K6	5.24384	0	12.7432
TCGA-CZ-5453	6.6274	1	18.8286
TCGA-BP-4763	3.47945	1	9.7393
TCGA-B0-4847	2.1726	1	19.1406
TCGA-BQ-5887	2.11233	0	12.6015
TCGA-IA-A83T	7.35342	1	20.9957
TCGA-A4-7915	0.0191781	0	16.489
TCGA-DW-7963	3.39726	0	7.3509
TCGA-CZ-5469	2.59178	1	12.7528
TCGA-B9-4116	1.71781	0	21.2987
TCGA-5P-A9JU	1.02192	0	15.1245
TCGA-CZ-4863	5.28219	0	15.3558
TCGA-A4-A57E	0.706849	1	14.3191
TCGA-CJ-5684	6.11233	0	18.4852
TCGA-BP-5187	1.11233	0	17.3531
TCGA-AL-3466	0.80274	1	7.54092
TCGA-B4-5378	0.479452	0	19.2802
TCGA-B8-5164	0.0712329	0	18.6462
TCGA-B1-A654	1.68767	0	15.7985
TCGA-IZ-A6M9	1.03014	0	13.5198
TCGA-B0-5694	1.31507	1	15.3202
TCGA-F9-A97G	0.0356164	0	12.7559
TCGA-A4-8098	2.45479	0	21.0457
TCGA-B0-4846	3.28767	1	22.3692
TCGA-BP-4770	0.90137	1	20.0989
TCGA-BP-4777	4.74247	0	12.4025
TCGA-B1-A657	1.75616	0	13.0227
TCGA-A4-7584	1.78082	0	14.9553
TCGA-CW-5588	5.52603	0	13.3902
TCGA-A3-3307	3.93425	0	20.6752
TCGA-B0-4700	5.42466	1	22.0511
TCGA-CJ-5681	1.51233	1	13.0031
TCGA-BP-4337	0.00547945	1	16.475
TCGA-A4-7288	5.08767	0	13.7141
TCGA-A4-8310	2.13699	0	12.1985
TCGA-G7-6793	0.920548	1	19.9355
TCGA-J7-A8I2	0.841096	0	12.8527
TCGA-A3-3317	4.08493	0	18.3662
TCGA-A4-8516	0.0630137	0	14.9989
TCGA-B0-4718	4.87123	0	25.2685
TCGA-CW-5580	5.38082	1	18.5461
TCGA-BP-5183	3.53699	0	19.7011
TCGA-B0-5698	9.94795	0	23.8302
TCGA-B9-A5W7	1.60274	0	13.8643
TCGA-BP-4176	5.35616	0	15.1281
TCGA-CJ-6033	0.613699	1	16.1594
TCGA-AK-3426	2.42466	1	14.1169
TCGA-BQ-5892	0.99726	0	15.4871
TCGA-AK-3443	3.89863	0	11.7402
TCGA-B0-4817	2.79178	1	13.8789
TCGA-B0-5080	0.936986	1	19.8088
TCGA-B9-7268	1.83836	0	14.7293
TCGA-CJ-4871	6.63836	0	16.9793
TCGA-B0-4696	2.3726	1	13.1621
TCGA-B0-4714	0.271233	1	16.0418
TCGA-BQ-7061	0.59726	0	15.783
TCGA-BP-4781	5.69863	0	15.1601
TCGA-B0-5085	2.10959	1	16.8549
TCGA-2Z-A9JR	0.441096	0	14.5883
TCGA-MH-A561	2.30411	0	21.8442
TCGA-5P-A9JW	8.87945	0	12.4288
TCGA-B8-4151	3.5589	0	20.663
TCGA-WN-AB4C	3.25479	0	6.15027
TCGA-B1-A47M	1.80548	0	19.7713
TCGA-IA-A83V	8.05753	1	16.5456
TCGA-IZ-A6M8	1.36164	0	12.6125
TCGA-Q2-A5QZ	1.1726	0	17.1151
TCGA-BQ-7055	2.18904	0	14.4117
TCGA-MH-A857	2.43836	0	10.3245
TCGA-A3-3362	4.27123	0	18.2856
TCGA-CJ-5689	4.43836	1	17.7267
TCGA-B0-4707	1.64384	1	10.0489
TCGA-B0-5399	3.86575	0	19.6662
TCGA-DV-A4VZ	1	0	24.4802
TCGA-CZ-5466	1.87671	0	15.5819
TCGA-CJ-4881	5.51781	0	15.5427
TCGA-DV-5568	1.0137	0	18.3917
TCGA-G7-A8LE	6.72055	0	20.1164
TCGA-A4-8515	1.94247	0	14.5364
TCGA-CJ-4890	9.6411	0	15.6463
TCGA-CZ-5455	1.53699	1	13.9192
TCGA-BP-4789	4.07945	0	17.5028
TCGA-2Z-A9J6	4.74247	0	12.9265
TCGA-EU-5907	0.347945	0	16.7035
TCGA-B8-A54K	1.28493	0	16.3084
TCGA-B0-5110	5.50411	0	19.9267
TCGA-BP-4169	1.92055	1	23.1198
TCGA-CJ-4643	4.91233	0	18.3532
TCGA-IA-A83S	7.14795	1	10.3552
TCGA-B0-5700	4.90411	0	25.0929
TCGA-B8-5552	2.86575	0	19.3698
TCGA-AK-3431	6.13973	1	23.1085
TCGA-MH-A855	1.01096	0	14.1078
TCGA-CJ-4876	5.35616	0	23.9117
TCGA-2Z-A9JD	2.90411	0	11.5327
TCGA-BQ-5894	0.230137	0	27.4918
TCGA-B8-4622	4.17808	0	18.0582
TCGA-2Z-A9JL	2.75616	0	17.5646
TCGA-A3-3343	2.58904	0	18.9511
TCGA-CJ-4642	8.78082	0	17.1491
TCGA-B0-4819	0.50137	1	15.1969
TCGA-2Z-A9JK	3.24932	0	18.0297
TCGA-2Z-A9J2	4.91781	0	12.1792
TCGA-B0-4813	0.0493151	1	14.7619
TCGA-DV-5569	0.972603	0	22.9415
TCGA-A3-3331	4.06849	0	18.9552
TCGA-B0-4824	4.53973	1	18.5493
TCGA-CJ-4900	4.69589	1	20.6979
TCGA-CJ-4639	8.84658	0	16.0181
TCGA-B0-5102	7.5726	1	16.7075
TCGA-2Z-A9J1	6.29589	0	11.8486
TCGA-CZ-4853	2.12055	0	15.9998
TCGA-CJ-4882	5.1589	0	18.2925
TCGA-A4-7286	1.51781	0	17.2721
TCGA-B8-A54G	0.145205	0	16.9533
TCGA-A4-8312	1.93973	0	13.0418
TCGA-IA-A83W	5.59726	1	15.8308
TCGA-UZ-A9Q0	9.2274	0	8.11099
TCGA-GL-A59T	1.49589	0	12.4416
TCGA-A4-7287	1.63562	1	19.3388
TCGA-B9-4617	0.0958904	0	10.7489
TCGA-GL-A59R	1.03562	0	14.4473
TCGA-CJ-4899	4.1863	0	17.828
TCGA-P4-A5E7	7.25753	0	15.064
TCGA-DW-7840	0.312329	0	15.2526
TCGA-GK-A6C7	0.167123	0	25.3381
TCGA-AK-3460	6.87123	0	18.8136
TCGA-B0-5117	4.40548	0	13.5333
TCGA-G7-7501	1.70959	1	12.5465
TCGA-B0-5710	6.65753	0	18.9384
TCGA-AL-3468	6.3863	1	15.4348
TCGA-BP-4332	3.10411	0	18.9567
TCGA-CZ-5462	0.852055	1	13.8486
TCGA-CJ-4901	3.9726	0	21.1586
TCGA-A3-3383	2.3589	0	17.7457
TCGA-BP-5168	4.00822	1	18.2098
TCGA-AK-3436	9.12603	0	14.0552
TCGA-AK-3465	1.01096	0	8.71517
TCGA-CZ-5989	5.21918	0	3.93767
TCGA-B8-4154	3.78082	0	13.0466
TCGA-BP-4960	5.95068	0	16.5229
TCGA-CJ-5682	10.2356	0	22.9101
TCGA-CJ-4640	9.53425	0	17.0157
TCGA-AK-3453	6.93425	0	18.8468
TCGA-CJ-6032	9.96986	0	20.1625
TCGA-B1-A47N	3.0411	0	12.4321
TCGA-B0-4821	3.36986	1	17.4984
TCGA-5P-A9KE	2.25753	0	10.1433
TCGA-B3-4103	2.54795	0	13.9078
TCGA-BP-5006	2.30137	0	21.0487
TCGA-B0-4815	4.35068	1	18.0308
TCGA-B0-4691	0.380822	1	17.0696
TCGA-BP-4761	0.49863	0	22.4078
TCGA-BP-4776	1.12603	0	20.5042
TCGA-B1-5398	3.4274	0	18.9393
TCGA-BP-5182	3.19178	0	17.7628
TCGA-BQ-7048	7.77808	0	18.758
TCGA-A3-3387	1.69041	0	16.7337
TCGA-O9-A75Z	1.29041	0	20.2734
TCGA-B0-4698	0.115068	1	22.4316
TCGA-B0-5106	4.37808	1	18.8859
TCGA-G7-A8LD	1.40822	1	23.2957
TCGA-A4-A5Y0	0.690411	0	15.8932
TCGA-B0-5081	0.991781	1	16.3232
TCGA-AK-3447	3.33425	0	5.30629
TCGA-AK-3456	3.13151	0	13.2527
TCGA-CZ-4861	1.22192	1	16.5797
TCGA-B4-5838	0.454795	0	11.8278
TCGA-A3-3323	3.03014	0	14.646
TCGA-CZ-4858	5.76712	1	19.1174
TCGA-B0-5691	9.4	0	16.6291
TCGA-UZ-A9PS	5.93699	0	11.7352
TCGA-PJ-A5Z9	1.47945	0	12.7893
TCGA-B4-5844	0.0191781	0	18.3248
TCGA-B2-3924	2.99178	0	11.5843
TCGA-A3-3352	1.53699	1	16.5557
TCGA-Y8-A8RZ	0.306849	0	15.1946
TCGA-A3-3358	3.58082	0	15.4167
TCGA-A3-3382	1.5726	0	15.2625
TCGA-BP-4977	1.24384	0	16.3479
TCGA-CZ-4865	0.454795	1	14.7349
TCGA-BP-5199	3.71233	0	22.5567
TCGA-B9-4113	4.20822	1	16.9408
TCGA-DV-A4VX	4.45479	1	12.2923
TCGA-B0-5092	1.25753	1	19.3187
TCGA-BP-4353	1.0274	1	11.5412
TCGA-EU-5906	0.564384	0	17.5909
TCGA-5P-A9K3	1.29041	1	15.4176
TCGA-BQ-5893	0.660274	1	20.2192
