# Supplementary material for: Sunitinib-suppressed miR-452-5p facilitates renal cancer cell invasion and metastasis through modulating SMAD4/SMAD7 signals
Source: Mol Cancer. 2018 Nov 12;17:157. doi: 10.1186/s12943-018-0906-x (PMC6231268; doi:10.1186/s12943-018-0906-x)
Supplement: Supplementary file 11 — Table S11. P65 expression and patients’ survival time from TCGA RCC dataset. (XLSX 42 kb) [file 12943_2018_906_MOESM11_ESM.xlsx]

## Sheet: Sheet1
Table S11. SMAD4 expression in RCC and normal renal samples from RCC TCGA dataset
id	expression	Type
TCGA-BQ-7044-11A-01R-1965-07	6.16778	Normal
TCGA-A3-3387-11A-01R-1541-07	4.95273	Normal
TCGA-BQ-7055-11A-01R-1965-07	6.33953	Normal
TCGA-DZ-6132-11A-01R-1965-07	6.67157	Normal
TCGA-CW-5585-11A-01R-1541-07	6.61056	Normal
TCGA-CZ-5462-11A-01R-1503-07	7.78566	Normal
TCGA-CZ-5986-11A-01R-1672-07	7.38359	Normal
TCGA-BQ-5891-11A-01R-1592-07	5.84178	Normal
TCGA-GL-A59R-11A-11R-A26U-07	5.66788	Normal
TCGA-BQ-5877-11A-01R-1592-07	5.15908	Normal
TCGA-B0-5696-11A-01R-1541-07	5.92638	Normal
TCGA-BQ-7045-11A-01R-1965-07	5.67138	Normal
TCGA-B0-4700-11A-01R-1541-07	5.85551	Normal
TCGA-CJ-6033-11A-01R-1858-07	5.9108	Normal
TCGA-B0-5711-11A-01R-1672-07	7.7437	Normal
TCGA-GL-7966-11A-01R-2204-07	8.4846	Normal
TCGA-DZ-6131-11A-01R-1965-07	6.33729	Normal
TCGA-CZ-4865-11A-01R-1503-07	6.55702	Normal
TCGA-A3-3358-11A-01R-1541-07	5.62227	Normal
TCGA-BQ-5879-11A-01R-1592-07	5.22724	Normal
TCGA-DZ-6134-11A-01R-1965-07	4.95118	Normal
TCGA-CZ-5454-11A-01R-1503-07	7.30393	Normal
TCGA-CZ-5982-11A-01R-1672-07	6.01516	Normal
TCGA-CZ-5463-11A-01R-1503-07	7.81725	Normal
TCGA-GL-6846-11A-01R-1965-07	5.01044	Normal
TCGA-B8-5549-11A-01R-1541-07	8.35272	Normal
TCGA-CJ-5680-11A-01R-1541-07	8.67165	Normal
TCGA-DZ-6133-11A-01R-1965-07	5.36499	Normal
TCGA-CZ-5453-11A-01R-1503-07	8.21427	Normal
TCGA-B8-4622-11A-01R-1758-07	6.01376	Normal
TCGA-B0-5697-11A-01R-1541-07	5.98858	Normal
TCGA-BQ-7046-11A-01R-1965-07	5.51512	Normal
TCGA-CZ-5467-11A-01R-1503-07	4.63327	Normal
TCGA-B2-5641-11A-01R-1541-07	8.22885	Normal
TCGA-B9-4115-11A-01R-1758-07	6.60704	Normal
TCGA-CW-5587-11A-01R-1541-07	6.55964	Normal
TCGA-CW-6087-11A-01R-1672-07	6.16619	Normal
TCGA-A4-A57E-11A-11R-A26U-07	5.60066	Normal
TCGA-CJ-5679-11A-01R-1541-07	7.92479	Normal
TCGA-CW-5580-11A-02R-1672-07	7.4981	Normal
TCGA-BQ-5875-11A-01R-1592-07	6.83006	Normal
TCGA-CZ-4864-11A-01R-1503-07	4.84957	Normal
TCGA-B8-4620-11A-01R-1758-07	7.45745	Normal
TCGA-CZ-5989-11A-01R-1672-07	8.21486	Normal
TCGA-BQ-5888-11A-01R-1592-07	6.13851	Normal
TCGA-B0-5709-11A-01R-1541-07	6.48934	Normal
TCGA-CJ-5676-11A-01R-1541-07	7.40158	Normal
TCGA-BQ-5884-11A-01R-1592-07	5.38103	Normal
TCGA-CZ-5469-11A-01R-1503-07	6.86513	Normal
TCGA-CZ-5987-11A-01R-1672-07	7.65038	Normal
TCGA-CZ-5984-11A-01R-1672-07	6.42128	Normal
TCGA-B8-5552-11A-01R-1672-07	9.9066	Normal
TCGA-BQ-5887-11A-01R-1965-07	5.47214	Normal
TCGA-BQ-5890-11A-01R-1592-07	5.8257	Normal
TCGA-B0-4712-11A-02R-1503-07	8.0252	Normal
TCGA-CW-5584-11A-01R-1541-07	7.51755	Normal
TCGA-Y8-A8RY-11A-11R-A37K-07	6.83453	Normal
TCGA-B0-5699-11A-01R-1541-07	6.57355	Normal
TCGA-CZ-5451-11A-01R-1503-07	5.94889	Normal
TCGA-CW-6090-11A-01R-1672-07	7.04055	Normal
TCGA-BQ-7051-11A-02R-1965-07	6.03861	Normal
TCGA-B8-4619-11A-01R-1758-07	5.21793	Normal
TCGA-B2-5636-11A-01R-1541-07	6.70559	Normal
TCGA-CZ-5468-11A-01R-1503-07	7.22735	Normal
TCGA-CZ-5465-11A-01R-1503-07	9.17011	Normal
TCGA-B0-5712-11A-01R-1672-07	7.55282	Normal
TCGA-CJ-5689-11A-01R-1541-07	7.36507	Normal
TCGA-CZ-4863-11A-01R-1503-07	5.39656	Normal
TCGA-CW-5589-11A-01R-1541-07	6.7107	Normal
TCGA-CZ-5456-11A-02R-1503-07	5.6535	Normal
TCGA-B0-5701-11A-01R-1541-07	6.48843	Normal
TCGA-GL-A9DE-11A-11R-A37K-07	5.8666	Normal
TCGA-CZ-5470-11A-01R-1503-07	8.64837	Normal
TCGA-CZ-5458-11A-01R-1503-07	6.32932	Normal
TCGA-B0-5705-11A-01R-1541-07	6.74643	Normal
TCGA-B0-5690-11A-01R-1541-07	6.44451	Normal
TCGA-P4-A5E8-11A-12R-A28H-07	5.07274	Normal
TCGA-B0-5703-11A-01R-1541-07	6.66816	Normal
TCGA-CJ-5681-11A-01R-1541-07	5.76098	Normal
TCGA-CZ-5988-11A-01R-1672-07	6.37279	Normal
TCGA-B0-5706-11A-01R-1541-07	6.31675	Normal
TCGA-B0-5694-11A-01R-1541-07	7.17692	Normal
TCGA-CJ-5672-11A-01R-1541-07	8.08416	Normal
TCGA-BQ-5894-11A-01R-1592-07	4.83801	Normal
TCGA-CW-6088-11A-01R-1672-07	7.56366	Normal
TCGA-CZ-5452-11A-01R-1503-07	7.56011	Normal
TCGA-CZ-5455-11A-01R-1503-07	6.70761	Normal
TCGA-CJ-6030-11A-01R-1672-07	6.22447	Normal
TCGA-CZ-5461-11A-01R-1503-07	7.08906	Normal
TCGA-BQ-5882-11A-01R-1592-07	4.69816	Normal
TCGA-CZ-5985-11A-01R-1672-07	5.68403	Normal
TCGA-B0-5691-11A-01R-1541-07	6.83364	Normal
TCGA-BQ-7059-11A-01R-1965-07	5.14707	Normal
TCGA-CJ-5677-11A-01R-1541-07	6.80539	Normal
TCGA-CZ-5466-11A-01R-1503-07	6.64823	Normal
TCGA-BQ-7061-11A-01R-1965-07	5.85267	Normal
TCGA-B0-5402-11A-01R-1503-07	5.65081	Normal
TCGA-CZ-5457-11A-01R-1503-07	5.8399	Normal
TCGA-CW-5591-11A-01R-1541-07	4.09583	Normal
TCGA-A4-A4ZT-11A-11R-A26U-07	7.08498	Normal
TCGA-CJ-5678-11A-01R-1541-07	6.36922	Normal
TCGA-BQ-5878-11A-01R-1592-07	5.356	Normal
TCGA-P4-A5ED-11A-11R-A28H-07	6.59656	Normal
TCGA-CW-5581-11A-01R-1541-07	6.39294	Normal
TCGA-UZ-A9PS-05A-11R-A42S-07	4.08089	Tumor
TCGA-A3-A6NI-01A-11R-A33J-07	5.28823	Tumor
TCGA-BP-4353-01A-02R-1289-07	5.51794	Tumor
TCGA-A3-3380-01A-01R-0864-07	8.53949	Tumor
TCGA-B0-5706-01A-11R-1541-07	4.97128	Tumor
TCGA-B0-4699-01A-01R-1277-07	5.4724	Tumor
TCGA-5P-A9K3-01A-11R-A42S-07	2.06205	Tumor
TCGA-AK-3460-01A-02R-1277-07	6.6215	Tumor
TCGA-HE-7129-01A-11R-1965-07	5.88433	Tumor
TCGA-CJ-6032-01A-11R-1672-07	3.30594	Tumor
TCGA-B0-5113-01A-01R-1420-07	8.15229	Tumor
TCGA-B0-4833-01A-01R-1305-07	4.87357	Tumor
TCGA-AK-3427-01A-01R-0864-07	6.19071	Tumor
TCGA-BP-4961-01A-01R-1334-07	7.61313	Tumor
TCGA-G6-A8L8-01A-21R-A37O-07	6.52838	Tumor
TCGA-AK-3461-01A-02R-1277-07	7.96426	Tumor
TCGA-2Z-A9JN-01A-21R-A42S-07	3.63586	Tumor
TCGA-G6-A8L6-01A-11R-A37O-07	5.07022	Tumor
TCGA-B4-5838-01A-11R-1672-07	6.41514	Tumor
TCGA-B0-4823-01A-02R-1420-07	6.14633	Tumor
TCGA-5P-A9KA-01A-11R-A42S-07	6.45433	Tumor
TCGA-A3-3320-01A-02R-1325-07	8.45551	Tumor
TCGA-2Z-A9J8-01A-11R-A42S-07	5.17558	Tumor
TCGA-EV-5901-01A-11R-1592-07	7.53048	Tumor
TCGA-HE-A5NL-01A-11R-A26U-07	4.7457	Tumor
TCGA-B0-5117-01A-01R-1420-07	3.92195	Tumor
TCGA-B8-4153-01B-11R-1672-07	4.24198	Tumor
TCGA-CJ-5681-01A-11R-1541-07	7.46198	Tumor
TCGA-B0-5692-01A-11R-1541-07	4.78624	Tumor
TCGA-BQ-7053-01A-11R-1965-07	5.1431	Tumor
TCGA-CJ-4636-01A-02R-1325-07	4.49094	Tumor
TCGA-G7-A4TM-01A-11R-A31O-07	6.11943	Tumor
TCGA-P4-AAVK-01A-11R-A42S-07	4.32888	Tumor
TCGA-UZ-A9PV-01A-11R-A42S-07	4.96912	Tumor
TCGA-BP-4801-01A-02R-1420-07	5.40173	Tumor
TCGA-CJ-4869-01A-02R-1426-07	3.92778	Tumor
TCGA-BQ-5886-01A-11R-1592-07	2.29926	Tumor
TCGA-CJ-4908-01A-01R-1426-07	7.11729	Tumor
TCGA-CZ-5985-01A-11R-1672-07	3.78347	Tumor
TCGA-DV-5565-01A-01R-1541-07	5.20169	Tumor
TCGA-BP-4782-01A-02R-1420-07	5.32468	Tumor
TCGA-G7-A8LE-01A-11R-A36F-07	7.70107	Tumor
TCGA-B0-4841-01A-01R-1277-07	2.41098	Tumor
TCGA-G7-6796-01A-11R-1965-07	3.37138	Tumor
TCGA-2Z-A9JG-01A-11R-A42S-07	4.80628	Tumor
TCGA-BP-5173-01A-01R-1426-07	4.50444	Tumor
TCGA-BP-5007-01A-01R-1334-07	7.16435	Tumor
TCGA-BP-4177-01A-02R-1420-07	10.169	Tumor
TCGA-2Z-A9JE-01A-11R-A42S-07	5.08534	Tumor
TCGA-BP-4991-01A-01R-1334-07	8.84794	Tumor
TCGA-B0-4698-01A-01R-1503-07	4.1674	Tumor
TCGA-BP-5009-01A-01R-1334-07	5.06726	Tumor
TCGA-A4-7584-01A-11R-2139-07	6.36582	Tumor
TCGA-B4-5843-01A-11R-1672-07	7.1551	Tumor
TCGA-BP-5001-01A-01R-1334-07	4.29181	Tumor
TCGA-B0-5399-01A-01R-1503-07	5.60178	Tumor
TCGA-A3-A8OU-01A-11R-A37O-07	4.46366	Tumor
TCGA-BP-4999-01A-01R-1334-07	7.77545	Tumor
TCGA-CJ-4876-01A-01R-1305-07	5.58465	Tumor
TCGA-CJ-5686-01A-11R-1672-07	4.92623	Tumor
TCGA-5P-A9KF-01A-11R-A42S-07	4.90226	Tumor
TCGA-IZ-8196-01A-11R-2404-07	7.20873	Tumor
TCGA-B0-4843-01A-01R-1277-07	3.7828	Tumor
TCGA-B0-5116-01A-02R-1420-07	4.83128	Tumor
TCGA-BP-4759-01A-01R-1289-07	3.70411	Tumor
TCGA-B0-5083-01A-02R-1420-07	7.00305	Tumor
TCGA-A4-7734-01A-11R-A32Z-07	7.89824	Tumor
TCGA-B0-4815-01A-01R-1503-07	4.32099	Tumor
TCGA-BP-4334-01A-01R-1289-07	6.17837	Tumor
TCGA-CZ-4861-01A-01R-1305-07	5.48276	Tumor
TCGA-CJ-4902-01A-01R-1426-07	5.45306	Tumor
TCGA-DV-5574-01A-01R-1541-07	5.22124	Tumor
TCGA-BQ-5891-01A-11R-1592-07	5.08241	Tumor
TCGA-B0-5121-01A-02R-1420-07	3.37403	Tumor
TCGA-CZ-4856-01A-02R-1426-07	5.23537	Tumor
TCGA-B0-5110-01A-01R-1420-07	7.66022	Tumor
TCGA-BP-4804-01A-02R-1305-07	5.04847	Tumor
TCGA-G7-6793-01A-11R-1965-07	4.56387	Tumor
TCGA-B9-5155-01A-01R-1592-07	10.1663	Tumor
TCGA-A3-3335-01A-01R-0864-07	4.18856	Tumor
TCGA-2Z-A9J9-01A-11R-A42S-07	9.08519	Tumor
TCGA-Y8-A894-01A-11R-A36F-07	7.87138	Tumor
TCGA-GL-8500-01A-11R-2404-07	5.08911	Tumor
TCGA-CJ-5682-01A-11R-1541-07	5.79682	Tumor
TCGA-SX-A7SP-01A-11R-A355-07	3.88008	Tumor
TCGA-BP-4972-01A-01R-1334-07	7.69819	Tumor
TCGA-CJ-6027-01A-11R-1672-07	3.67715	Tumor
TCGA-BQ-5890-01A-11R-1592-07	4.52803	Tumor
TCGA-Y8-A8S0-01A-11R-A37K-07	7.7121	Tumor
TCGA-CJ-5675-01A-11R-1541-07	5.29231	Tumor
TCGA-BP-4355-01A-01R-1289-07	6.06824	Tumor
TCGA-BP-4960-01A-01R-1334-07	3.12689	Tumor
TCGA-A3-3378-01A-02R-1325-07	5.34333	Tumor
TCGA-BP-4160-01A-02R-1289-07	5.45871	Tumor
TCGA-5P-A9JY-01A-11R-A42S-07	4.56119	Tumor
TCGA-F9-A4JJ-01A-11R-A24Z-07	3.55661	Tumor
TCGA-B8-5163-01A-01R-1420-07	4.03534	Tumor
TCGA-G7-7501-01A-11R-2204-07	7.67259	Tumor
TCGA-CZ-4859-01A-02R-1426-07	6.66626	Tumor
TCGA-B8-4154-01A-01R-1188-07	5.71683	Tumor
TCGA-DW-7837-01A-11R-2139-07	6.2893	Tumor
TCGA-B3-4104-01A-02R-1351-07	6.54142	Tumor
TCGA-A4-8516-01A-11R-2404-07	5.70609	Tumor
TCGA-A3-A8OX-01A-11R-A37O-07	4.94117	Tumor
TCGA-B0-4713-01A-01R-1277-07	4.54426	Tumor
TCGA-B0-5098-01A-01R-1420-07	5.71708	Tumor
TCGA-A3-A8OW-01A-11R-A37O-07	6.80007	Tumor
TCGA-BQ-5888-01A-11R-1592-07	3.7607	Tumor
TCGA-A3-3382-01A-02R-1325-07	7.51519	Tumor
TCGA-B9-A8YI-01A-21R-A37K-07	3.18066	Tumor
TCGA-CZ-4866-01A-01R-1503-07	4.49165	Tumor
TCGA-A4-A5Y1-01A-11R-A28H-07	3.7014	Tumor
TCGA-A3-3311-01A-02R-1325-07	6.4972	Tumor
TCGA-B2-4099-01A-02R-1188-07	7.05487	Tumor
TCGA-BP-4965-01A-01R-1334-07	8.44107	Tumor
TCGA-BQ-5883-01A-11R-1592-07	4.42764	Tumor
TCGA-BP-4342-01A-01R-1289-07	7.83685	Tumor
TCGA-CW-5589-01A-01R-1541-07	6.14507	Tumor
TCGA-B0-5701-01A-11R-1541-07	4.70331	Tumor
TCGA-B8-5553-01A-01R-1541-07	5.44393	Tumor
TCGA-A3-A6NJ-01A-12R-A33J-07	5.39885	Tumor
TCGA-B9-4113-01A-01R-1193-07	8.59563	Tumor
TCGA-DZ-6133-01A-11R-1965-07	6.01733	Tumor
TCGA-BQ-7061-01A-11R-1965-07	5.62835	Tumor
TCGA-B1-A47N-01A-11R-A24Z-07	5.41908	Tumor
TCGA-AL-3471-01A-02R-1351-07	4.85506	Tumor
TCGA-MH-A55Z-01A-11R-A26U-07	5.43941	Tumor
TCGA-A4-A6HP-01A-11R-A31O-07	4.14362	Tumor
TCGA-B2-A4SR-01A-11R-A266-07	8.96862	Tumor
TCGA-CJ-4881-01A-01R-1305-07	3.43129	Tumor
TCGA-B9-A5W9-01A-11R-A28H-07	5.39517	Tumor
TCGA-Y8-A898-01A-11R-A355-07	4.32511	Tumor
TCGA-A4-8518-01A-11R-2404-07	2.56799	Tumor
TCGA-MH-A855-01A-11R-A355-07	4.89567	Tumor
TCGA-CW-5584-01A-01R-1541-07	5.45096	Tumor
TCGA-B0-4837-01A-01R-1305-07	4.5684	Tumor
TCGA-BP-5184-01A-01R-1426-07	6.88828	Tumor
TCGA-B0-5096-01A-01R-1420-07	5.18127	Tumor
TCGA-A3-3351-01A-02R-1325-07	7.4379	Tumor
TCGA-A3-3373-01A-02R-1420-07	7.42861	Tumor
TCGA-B0-4697-01A-01R-1277-07	3.81651	Tumor
TCGA-HE-A5NJ-01A-11R-A26U-07	6.08155	Tumor
TCGA-CZ-5987-01A-11R-1672-07	4.51882	Tumor
TCGA-DW-7834-01A-11R-2139-07	5.60827	Tumor
TCGA-B8-5546-01A-01R-1541-07	7.86739	Tumor
TCGA-A3-3325-01A-01R-0864-07	7.54541	Tumor
TCGA-B2-5636-01A-02R-1541-07	8.58647	Tumor
TCGA-Y8-A8S1-01A-11R-A37K-07	1.22191	Tumor
TCGA-2Z-A9J6-01A-11R-A38C-07	5.00808	Tumor
TCGA-Y8-A8RY-01A-11R-A37K-07	5.7041	Tumor
TCGA-CJ-6033-01A-11R-1672-07	4.5373	Tumor
TCGA-B4-5377-01A-01R-1503-07	6.86813	Tumor
TCGA-B8-5550-01A-01R-1541-07	3.61814	Tumor
TCGA-BP-5180-01A-01R-1426-07	3.48109	Tumor
TCGA-BP-4768-01A-01R-1289-07	6.22476	Tumor
TCGA-A4-8098-01A-11R-2404-07	5.18033	Tumor
TCGA-BP-5008-01A-01R-1334-07	6.94527	Tumor
TCGA-CJ-4916-01A-01R-1426-07	5.21235	Tumor
TCGA-BQ-5875-01A-11R-1592-07	4.60432	Tumor
TCGA-IA-A40X-01A-11R-A24Z-07	4.31599	Tumor
TCGA-CZ-4854-01A-01R-1305-07	4.5343	Tumor
TCGA-B4-5836-01A-11R-1672-07	5.91847	Tumor
TCGA-GL-A9DE-01A-11R-A37K-07	4.69325	Tumor
TCGA-B0-5707-01A-11R-1541-07	4.19395	Tumor
TCGA-B8-A54F-01A-11R-A266-07	6.03735	Tumor
TCGA-CZ-5459-01A-01R-1503-07	3.70982	Tumor
TCGA-CZ-5451-01A-01R-1503-07	5.78812	Tumor
TCGA-B8-5551-01A-01R-1541-07	3.75337	Tumor
TCGA-B8-A54E-01A-11R-A266-07	4.08739	Tumor
TCGA-A3-A6NN-01A-12R-A33J-07	7.08767	Tumor
TCGA-5P-A9K6-01A-11R-A42S-07	4.36	Tumor
TCGA-BP-5187-01A-01R-1426-07	5.38477	Tumor
TCGA-DW-5560-01A-01R-1592-07	8.02328	Tumor
TCGA-CZ-4860-01A-01R-1305-07	5.83648	Tumor
TCGA-BQ-5881-01A-11R-1592-07	1.81226	Tumor
TCGA-P4-A5EA-01A-11R-A28H-07	2.42086	Tumor
TCGA-B0-5104-01A-01R-1420-07	7.07069	Tumor
TCGA-AK-3426-01A-02R-1325-07	3.40137	Tumor
TCGA-B0-5077-01A-01R-1334-07	5.73345	Tumor
TCGA-B9-4115-01A-01R-1193-07	6.6128	Tumor
TCGA-PJ-A5Z9-01A-11R-A28H-07	5.40213	Tumor
TCGA-B0-4849-01A-01R-1277-07	7.15535	Tumor
TCGA-BP-4352-01A-01R-1289-07	4.1315	Tumor
TCGA-B0-4694-01A-01R-1277-07	4.45696	Tumor
TCGA-CJ-4639-01A-02R-1325-07	7.90367	Tumor
TCGA-DV-5569-01A-01R-1541-07	5.29192	Tumor
TCGA-A4-A7UZ-01A-12R-A355-07	5.67036	Tumor
TCGA-AK-3443-01A-02R-1325-07	8.14909	Tumor
TCGA-B2-5641-01A-01R-1541-07	3.29261	Tumor
TCGA-B0-5710-01A-11R-1672-07	6.92276	Tumor
TCGA-CZ-5456-01A-01R-1503-07	3.00553	Tumor
TCGA-CJ-5678-01A-11R-1541-07	5.69172	Tumor
TCGA-CZ-4858-01A-01R-1305-07	4.43163	Tumor
TCGA-BP-4170-01A-02R-1289-07	5.58329	Tumor
TCGA-AK-3440-01A-02R-1277-07	4.44031	Tumor
TCGA-B3-3926-01A-02R-1351-07	6.84161	Tumor
TCGA-A3-3372-01A-02R-1325-07	5.50961	Tumor
TCGA-B0-4706-01A-01R-1503-07	6.02612	Tumor
TCGA-CZ-5460-01A-01R-1503-07	4.4685	Tumor
TCGA-BP-4341-01A-01R-1289-07	5.79702	Tumor
TCGA-BP-5004-01A-01R-1334-07	7.39067	Tumor
TCGA-A4-7915-01A-11R-2204-07	4.2829	Tumor
TCGA-BP-5006-01A-01R-1334-07	6.10867	Tumor
TCGA-CJ-6030-01A-11R-1672-07	5.75691	Tumor
TCGA-B0-4688-01A-01R-1277-07	3.00311	Tumor
TCGA-SX-A7SO-01A-11R-A355-07	3.02586	Tumor
TCGA-B0-5095-01A-01R-1420-07	6.41174	Tumor
TCGA-BQ-5880-01A-11R-1592-07	2.70323	Tumor
TCGA-B0-5711-01A-11R-1672-07	6.49243	Tumor
TCGA-WN-AB4C-01A-11R-A42S-07	2.42637	Tumor
TCGA-A3-3308-01A-02R-1325-07	4.36093	Tumor
TCGA-PJ-A5Z8-01A-11R-A28H-07	7.21556	Tumor
TCGA-B0-5084-01A-01R-1334-07	5.77939	Tumor
TCGA-GL-A59R-01A-11R-A26U-07	5.91706	Tumor
TCGA-BP-4994-01A-01R-1334-07	6.57957	Tumor
TCGA-A3-3324-01A-02R-1325-07	5.14545	Tumor
TCGA-G6-A8L7-01A-11R-A37O-07	2.38852	Tumor
TCGA-B0-5696-01A-11R-1541-07	4.98827	Tumor
TCGA-DV-5566-01A-01R-1541-07	5.35885	Tumor
TCGA-UZ-A9Q0-01A-12R-A42S-07	3.31511	Tumor
TCGA-B0-5691-01A-11R-1541-07	7.46492	Tumor
TCGA-UZ-A9PR-01A-11R-A42S-07	7.90099	Tumor
TCGA-A4-7996-01A-11R-2204-07	5.03391	Tumor
TCGA-A3-3346-01A-01R-1766-07	2.58149	Tumor
TCGA-BP-4347-01A-01R-1289-07	4.85854	Tumor
TCGA-CJ-4878-01A-01R-1305-07	7.61522	Tumor
TCGA-BP-4993-01A-02R-1420-07	6.01371	Tumor
TCGA-BP-4977-01A-01R-1334-07	4.93456	Tumor
TCGA-Y8-A896-01A-11R-A36F-07	5.20878	Tumor
TCGA-BP-5178-01A-01R-1426-07	2.1673	Tumor
TCGA-B8-5162-01A-01R-1420-07	5.87587	Tumor
TCGA-V9-A7HT-01A-11R-A33Z-07	4.13457	Tumor
TCGA-CW-6097-01A-11R-1672-07	5.45359	Tumor
TCGA-B0-4814-01A-01R-1277-07	6.10822	Tumor
TCGA-BP-4992-01A-01R-1334-07	4.29374	Tumor
TCGA-A3-3323-01A-02R-1325-07	5.93883	Tumor
TCGA-UZ-A9PS-01A-11R-A42S-07	5.19793	Tumor
TCGA-CJ-5672-01A-11R-1541-07	4.078	Tumor
TCGA-BP-5168-01A-01R-1420-07	6.1913	Tumor
TCGA-A4-7828-01A-11R-2139-07	6.94716	Tumor
TCGA-EV-5902-01A-11R-1592-07	6.52972	Tumor
TCGA-BP-4964-01A-01R-1334-07	6.83877	Tumor
TCGA-CJ-4635-01A-02R-1305-07	7.68038	Tumor
TCGA-BP-4995-01A-01R-1334-07	7.1901	Tumor
TCGA-BP-4807-01A-01R-1305-07	7.06463	Tumor
TCGA-AK-3447-01A-01R-1766-07	4.28314	Tumor
TCGA-2Z-A9JL-01A-11R-A42S-07	7.32454	Tumor
TCGA-DW-7842-01A-11R-A32Z-07	8.45595	Tumor
TCGA-BP-4967-01A-01R-1334-07	5.45335	Tumor
TCGA-UZ-A9Q1-01A-11R-A42S-07	4.14567	Tumor
TCGA-A4-7286-01A-11R-A32Z-07	2.37963	Tumor
TCGA-A3-3362-01A-02R-1325-07	6.50205	Tumor
TCGA-3Z-A93Z-01A-11R-A37O-07	5.29794	Tumor
TCGA-A3-3357-01A-02R-1420-07	4.11593	Tumor
TCGA-UZ-A9PQ-01A-11R-A42S-07	4.70434	Tumor
TCGA-B9-A69E-01A-11R-A31O-07	4.79125	Tumor
TCGA-BP-4161-01A-02R-1325-07	5.79597	Tumor
TCGA-CZ-4862-01A-01R-1305-07	7.81554	Tumor
TCGA-A4-7997-01A-11R-2204-07	5.4935	Tumor
TCGA-BP-4976-01A-01R-1334-07	6.87912	Tumor
TCGA-B2-3923-01A-02R-1325-07	8.07485	Tumor
TCGA-CJ-4882-01A-02R-1426-07	4.50742	Tumor
TCGA-P4-A5E7-01A-31R-A28H-07	5.02095	Tumor
TCGA-B0-5697-01A-11R-1541-07	4.51731	Tumor
TCGA-BP-5189-01A-02R-1426-07	5.03679	Tumor
TCGA-P4-AAVO-01A-11R-A42S-07	3.57613	Tumor
TCGA-BP-4766-01A-01R-1289-07	6.08486	Tumor
TCGA-P4-AAVM-01A-11R-A42S-07	3.18328	Tumor
TCGA-IA-A83S-01A-11R-A355-07	3.43749	Tumor
TCGA-CJ-4871-01A-01R-1305-07	5.04647	Tumor
TCGA-BP-4795-01A-02R-1420-07	6.80443	Tumor
TCGA-BP-5190-01A-01R-1426-07	3.01948	Tumor
TCGA-B8-4143-01A-01R-1188-07	6.02808	Tumor
TCGA-CW-5583-01A-02R-1541-07	10.5428	Tumor
TCGA-BP-5000-01A-01R-1334-07	3.34628	Tumor
TCGA-B0-5695-01A-11R-1541-07	6.40777	Tumor
TCGA-B0-5108-01A-01R-1420-07	6.25317	Tumor
TCGA-MH-A856-01A-11R-A355-07	4.80687	Tumor
TCGA-A3-3328-01A-01R-0864-07	8.94871	Tumor
TCGA-MH-A561-01A-11R-A26U-07	6.34975	Tumor
TCGA-DV-5576-01A-01R-1541-07	7.67101	Tumor
TCGA-B0-5109-01A-02R-1420-07	3.92435	Tumor
TCGA-B8-A8YJ-01A-13R-A39I-07	5.81548	Tumor
TCGA-B0-5693-01A-11R-1541-07	8.35109	Tumor
TCGA-B0-5698-01A-11R-1672-07	6.26613	Tumor
TCGA-B2-5639-01A-01R-1541-07	5.62228	Tumor
TCGA-BP-4329-01A-02R-1289-07	6.46198	Tumor
TCGA-2Z-A9JK-01A-11R-A42S-07	4.50495	Tumor
TCGA-BQ-5893-01A-11R-1592-07	5.37728	Tumor
TCGA-IA-A83W-01A-11R-A355-07	5.41853	Tumor
TCGA-B9-4116-01A-02R-1351-07	4.09462	Tumor
TCGA-BP-4162-01A-02R-1325-07	5.64949	Tumor
TCGA-B9-5156-01A-01R-1592-07	6.13382	Tumor
TCGA-B0-5699-01A-11R-1541-07	7.2169	Tumor
TCGA-A3-3306-01A-01R-0864-07	7.16657	Tumor
TCGA-DW-7840-01A-11R-A32Z-07	2.67776	Tumor
TCGA-CZ-5984-01A-11R-1672-07	4.37331	Tumor
TCGA-MM-A84U-01A-11R-A37O-07	3.39513	Tumor
TCGA-B0-4827-01A-02R-1420-07	3.2785	Tumor
TCGA-DW-7841-01A-11R-A32Z-07	5.28144	Tumor
TCGA-GL-7773-01A-11R-A32Z-07	2.96855	Tumor
TCGA-BP-4765-01A-01R-1289-07	7.45271	Tumor
TCGA-2Z-A9JD-01A-11R-A42S-07	5.3989	Tumor
TCGA-A4-A4ZT-01A-11R-A26U-07	5.35773	Tumor
TCGA-2Z-A9JT-01A-11R-A42S-07	3.13886	Tumor
TCGA-A3-3352-01A-01R-0864-07	7.59265	Tumor
TCGA-J7-A8I2-01A-12R-A36F-07	1.97203	Tumor
TCGA-B0-5102-01A-01R-1420-07	6.17923	Tumor
TCGA-BP-4354-01A-02R-1289-07	6.76032	Tumor
TCGA-BP-4989-01A-01R-1334-07	5.41116	Tumor
TCGA-DV-5567-01A-01R-1541-07	8.2173	Tumor
TCGA-BP-5181-01A-01R-1426-07	3.8643	Tumor
TCGA-CJ-5671-01A-11R-1541-07	3.88986	Tumor
TCGA-CZ-5453-01A-01R-1503-07	5.83851	Tumor
TCGA-BQ-7050-01A-11R-1965-07	5.53282	Tumor
TCGA-B2-4102-01A-02R-1325-07	6.20155	Tumor
TCGA-BP-4769-01A-01R-1289-07	7.87087	Tumor
TCGA-EU-5906-01A-11R-1672-07	6.97014	Tumor
TCGA-MH-A560-01A-11R-A26U-07	2.89326	Tumor
TCGA-BP-5174-01A-01R-1426-07	3.37228	Tumor
TCGA-IA-A40U-01A-11R-A24Z-07	4.33709	Tumor
TCGA-CJ-4912-01A-01R-1426-07	3.45429	Tumor
TCGA-CJ-4875-01A-01R-1305-07	4.27893	Tumor
TCGA-B0-5115-01A-01R-1420-07	6.10374	Tumor
TCGA-BP-4173-01A-02R-1289-07	4.47793	Tumor
TCGA-B0-5097-01A-01R-1420-07	4.50747	Tumor
TCGA-4A-A93W-01A-11R-A37K-07	6.61699	Tumor
TCGA-2Z-A9JR-01A-12R-A42S-07	6.2531	Tumor
TCGA-EU-5905-01A-11R-1672-07	4.11944	Tumor
TCGA-BQ-5892-01A-11R-1592-07	4.85141	Tumor
TCGA-B0-4813-01A-01R-1277-07	4.81289	Tumor
TCGA-SX-A7SU-01A-11R-A36F-07	6.96847	Tumor
TCGA-BP-5177-01A-01R-1426-07	4.31708	Tumor
TCGA-CJ-4642-01B-01R-1305-07	6.78775	Tumor
TCGA-SX-A7SN-01A-11R-A355-07	4.87993	Tumor
TCGA-5P-A9KE-01A-11R-A42S-07	3.44186	Tumor
TCGA-P4-A5ED-01A-11R-A28H-07	4.64468	Tumor
TCGA-UZ-A9PK-01A-11R-A38C-07	5.41843	Tumor
TCGA-B8-5159-01A-01R-1420-07	6.50724	Tumor
TCGA-BQ-5884-01A-11R-1592-07	7.52283	Tumor
TCGA-P4-AAVL-01A-11R-A42S-07	5.70317	Tumor
TCGA-CJ-4637-01A-02R-1325-07	4.74222	Tumor
TCGA-4A-A93X-01A-11R-A37K-07	3.2331	Tumor
TCGA-B0-4822-01A-01R-1277-07	2.52191	Tumor
TCGA-B0-5709-01A-11R-1541-07	6.7979	Tumor
TCGA-A4-A5Y0-01A-11R-A31O-07	3.52938	Tumor
TCGA-B0-4714-01A-01R-1277-07	5.78059	Tumor
TCGA-CZ-5466-01A-01R-1503-07	3.96668	Tumor
TCGA-B8-A7U6-01A-12R-A37O-07	5.91229	Tumor
TCGA-CJ-4889-01A-01R-1305-07	6.60499	Tumor
TCGA-T7-A92I-01A-11R-A37O-07	6.94387	Tumor
TCGA-CJ-4893-01A-01R-1305-07	5.82764	Tumor
TCGA-BP-4756-01A-01R-1289-07	3.2867	Tumor
TCGA-A4-A5DU-01A-11R-A28H-07	5.65554	Tumor
TCGA-CJ-4641-01A-02R-1325-07	5.08476	Tumor
TCGA-A4-7732-01A-11R-2139-07	6.56199	Tumor
TCGA-B0-4818-01A-01R-1503-07	6.12366	Tumor
TCGA-BQ-7048-01A-11R-1965-07	5.07462	Tumor
TCGA-BQ-5879-01A-11R-1592-07	3.56977	Tumor
TCGA-B8-5552-01B-11R-1672-07	6.80736	Tumor
TCGA-AK-3428-01A-02R-1277-07	8.37171	Tumor
TCGA-BQ-5877-01A-11R-1592-07	4.74601	Tumor
TCGA-B0-4696-01A-01R-1277-07	5.69518	Tumor
TCGA-A3-3370-01A-02R-1420-07	6.89428	Tumor
TCGA-BP-4174-01A-02R-1289-07	4.99232	Tumor
TCGA-BP-4775-01A-01R-1289-07	7.01045	Tumor
TCGA-BP-4325-01A-02R-1289-07	7.47662	Tumor
TCGA-BP-4771-01A-01R-1289-07	4.64461	Tumor
TCGA-B2-5635-01A-01R-1541-07	4.75586	Tumor
TCGA-CJ-4895-01A-01R-1305-07	7.30772	Tumor
TCGA-AT-A5NU-01A-11R-A28H-07	4.52282	Tumor
TCGA-B0-4707-01A-01R-1277-07	3.72545	Tumor
TCGA-DV-A4W0-05A-11R-A266-07	9.08208	Tumor
TCGA-CZ-5989-01A-11R-1672-07	13.6455	Tumor
TCGA-CJ-5676-01A-11R-1541-07	2.90421	Tumor
TCGA-G7-A8LB-01A-11R-A36F-07	5.63905	Tumor
TCGA-B0-5812-01A-11R-1672-07	8.03113	Tumor
TCGA-BP-4346-01A-01R-1289-07	6.42039	Tumor
TCGA-B3-4103-01A-02R-1351-07	10.7012	Tumor
TCGA-B0-5092-01A-01R-1420-07	4.00854	Tumor
TCGA-G7-6789-01A-11R-1965-07	3.16424	Tumor
TCGA-SX-A7SL-01A-11R-A355-07	4.64142	Tumor
TCGA-6D-AA2E-01A-11R-A37O-07	5.73868	Tumor
TCGA-BP-4982-01A-01R-1334-07	7.87351	Tumor
TCGA-BP-4971-01A-01R-1334-07	5.23815	Tumor
TCGA-BP-4970-01A-01R-1334-07	7.29521	Tumor
TCGA-B0-4710-01A-01R-1503-07	7.61366	Tumor
TCGA-BP-4344-01A-01R-1289-07	7.39479	Tumor
TCGA-5P-A9JV-01A-12R-A42S-07	6.3833	Tumor
TCGA-2Z-A9JM-01A-12R-A42S-07	5.26278	Tumor
TCGA-B8-5545-01A-01R-1672-07	7.38383	Tumor
TCGA-HE-A5NH-01A-11R-A26U-07	6.80164	Tumor
TCGA-CJ-4870-01A-01R-1305-07	5.5856	Tumor
TCGA-B0-4828-01A-01R-1277-07	5.82448	Tumor
TCGA-CJ-5679-01A-11R-1541-07	2.33051	Tumor
TCGA-SX-A71V-01A-11R-A33Z-07	3.54669	Tumor
TCGA-B9-A44B-01A-11R-A24Z-07	3.61734	Tumor
TCGA-CZ-4857-01A-01R-1305-07	3.67874	Tumor
TCGA-A3-3307-01A-01R-0864-07	8.50455	Tumor
TCGA-AK-3465-01A-02R-1325-07	5.18971	Tumor
TCGA-A3-3331-01A-02R-1325-07	7.04738	Tumor
TCGA-IZ-8195-01A-31R-2404-07	3.77049	Tumor
TCGA-5P-A9K0-01A-11R-A42S-07	4.98493	Tumor
TCGA-CJ-4904-01A-02R-1426-07	6.25	Tumor
TCGA-CJ-4920-01A-01R-1426-07	5.37014	Tumor
TCGA-B0-5702-01A-11R-1541-07	5.90673	Tumor
TCGA-BQ-5889-01A-11R-1592-07	4.30248	Tumor
TCGA-BP-4163-01A-02R-1325-07	5.29948	Tumor
TCGA-IZ-A6M9-01A-11R-A31O-07	6.33758	Tumor
TCGA-B2-3924-01A-02R-A277-07	9.58778	Tumor
TCGA-B2-3924-01A-02R-1325-07	5.71876	Tumor
TCGA-BP-4777-01A-01R-1289-07	5.5141	Tumor
TCGA-CJ-4872-01A-01R-1305-07	4.64109	Tumor
TCGA-B0-5712-01A-11R-1672-07	5.00038	Tumor
TCGA-A3-A8CQ-01A-11R-A37O-07	7.17587	Tumor
TCGA-BP-4798-01A-01R-1305-07	5.28385	Tumor
TCGA-BQ-7051-01A-12R-1965-07	6.41743	Tumor
TCGA-BQ-7058-01A-11R-1965-07	1.11762	Tumor
TCGA-CZ-5461-01A-01R-1503-07	6.0554	Tumor
TCGA-BP-4337-01A-01R-1289-07	3.7493	Tumor
TCGA-CJ-5683-01A-11R-1541-07	4.89621	Tumor
TCGA-CJ-4899-01A-01R-1334-07	8.25471	Tumor
TCGA-A3-3365-01A-01R-0864-07	9.63049	Tumor
TCGA-A4-A5XZ-01A-11R-A31O-07	3.88987	Tumor
TCGA-CZ-5468-01A-01R-1503-07	2.7943	Tumor
TCGA-B0-5694-01A-11R-1541-07	4.4795	Tumor
TCGA-AL-3472-01A-01R-1193-07	6.20556	Tumor
TCGA-SX-A7SR-01A-12R-A36F-07	6.49344	Tumor
TCGA-B3-8121-01A-21R-2404-07	5.86458	Tumor
TCGA-KV-A74V-01A-11R-A33Z-07	4.44446	Tumor
TCGA-Y8-A895-01A-11R-A36F-07	5.44193	Tumor
TCGA-B0-5705-01A-11R-1541-07	5.88198	Tumor
TCGA-BP-5192-01A-01R-1426-07	6.6371	Tumor
TCGA-HE-A5NI-01A-11R-A26U-07	3.53339	Tumor
TCGA-BP-4790-01A-01R-1305-07	8.98579	Tumor
TCGA-CJ-6031-01A-11R-1672-07	4.70782	Tumor
TCGA-B1-A657-01A-11R-A31O-07	5.5801	Tumor
TCGA-G7-6795-01A-11R-1965-07	3.41741	Tumor
TCGA-B9-4617-01A-01R-1193-07	3.68279	Tumor
TCGA-B8-A54K-01A-11R-A33J-07	7.39716	Tumor
TCGA-5P-A9JZ-01A-11R-A42S-07	4.83315	Tumor
TCGA-AS-3778-01A-01R-A32Z-07	7.08781	Tumor
TCGA-BP-5196-01A-01R-1426-07	4.26351	Tumor
TCGA-DW-7836-01A-11R-2139-07	6.34522	Tumor
TCGA-BQ-5887-01A-11R-1965-07	2.04385	Tumor
TCGA-GL-6846-01A-11R-1965-07	5.93578	Tumor
TCGA-CJ-4886-01A-01R-1305-07	7.35474	Tumor
TCGA-B0-5713-01A-11R-1672-07	6.32438	Tumor
TCGA-MM-A563-01A-11R-A266-07	5.72026	Tumor
TCGA-A4-8515-01A-11R-2404-07	5.7999	Tumor
TCGA-B8-5164-01A-01R-1420-07	6.33411	Tumor
TCGA-2Z-A9JQ-01A-11R-A42S-07	6.64254	Tumor
TCGA-CW-6087-01A-11R-1672-07	6.15907	Tumor
TCGA-A3-3349-01A-01R-1188-07	6.9247	Tumor
TCGA-J7-8537-01A-11R-2404-07	3.19419	Tumor
TCGA-AK-3434-01A-02R-1277-07	6.31521	Tumor
TCGA-GL-7966-01A-11R-2204-07	2.52295	Tumor
TCGA-CJ-5680-01A-11R-1541-07	6.37418	Tumor
TCGA-A3-3347-01A-02R-1325-07	4.63187	Tumor
TCGA-BP-5200-01A-01R-1426-07	4.42317	Tumor
TCGA-DV-5573-01A-01R-1541-07	6.49664	Tumor
TCGA-B0-5700-01A-11R-1541-07	3.7081	Tumor
TCGA-2Z-A9JP-01A-11R-A42S-07	1.49682	Tumor
TCGA-SX-A71U-01A-12R-A33Z-07	5.01209	Tumor
TCGA-CJ-4907-01A-01R-1426-07	5.86958	Tumor
TCGA-BP-4351-01A-01R-1289-07	6.15534	Tumor
TCGA-CJ-4890-01A-01R-1305-07	5.31123	Tumor
TCGA-WN-A9G9-01A-12R-A37K-07	3.52507	Tumor
TCGA-A3-3317-01A-02R-1325-07	7.549	Tumor
TCGA-B0-5119-01A-02R-1420-07	7.39644	Tumor
TCGA-BP-4981-01A-01R-1334-07	3.82615	Tumor
TCGA-A4-7585-01A-11R-2139-07	4.21148	Tumor
TCGA-B3-A6W5-01A-12R-A33Z-07	4.38745	Tumor
TCGA-A4-8310-01A-11R-2404-07	2.06055	Tumor
TCGA-SX-A71W-01A-12R-A355-07	6.00457	Tumor
TCGA-2Z-A9J5-01A-21R-A38C-07	3.24214	Tumor
TCGA-BP-4331-01A-01R-1289-07	6.29757	Tumor
TCGA-HE-A5NF-01A-11R-A26U-07	3.02618	Tumor
TCGA-HE-7130-01A-11R-1965-07	3.77123	Tumor
TCGA-BP-4343-01A-02R-1289-07	5.00604	Tumor
TCGA-BP-4335-01A-01R-1289-07	5.40771	Tumor
TCGA-P4-A5E6-01A-11R-A28H-07	3.6824	Tumor
TCGA-BQ-7059-01A-11R-1965-07	3.09501	Tumor
TCGA-B0-4712-01A-01R-1503-07	3.88977	Tumor
TCGA-B8-5165-01A-01R-1420-07	7.07636	Tumor
TCGA-BQ-7045-01A-31R-1965-07	4.20499	Tumor
TCGA-B0-4703-01A-01R-1277-07	4.88977	Tumor
TCGA-BP-5176-01A-01R-1426-07	4.03344	Tumor
TCGA-CJ-4644-01A-02R-1325-07	5.48778	Tumor
TCGA-DW-7963-01B-11R-A28H-07	3.10006	Tumor
TCGA-B9-7268-01A-11R-A32Z-07	5.51443	Tumor
TCGA-CJ-4640-01A-02R-1325-07	6.30676	Tumor
TCGA-B4-5835-01A-11R-1672-07	3.19859	Tumor
TCGA-BP-4987-01A-01R-1334-07	8.44823	Tumor
TCGA-B8-5549-01A-01R-1541-07	5.12705	Tumor
TCGA-BP-4164-01A-02R-1325-07	6.7667	Tumor
TCGA-BP-4327-01A-01R-1289-07	5.27449	Tumor
TCGA-A3-3367-01A-02R-1420-07	6.43518	Tumor
TCGA-G7-6797-01A-11R-1965-07	8.09586	Tumor
TCGA-AK-3454-01A-02R-1277-07	2.60819	Tumor
TCGA-CJ-4901-01A-01R-1426-07	4.09573	Tumor
TCGA-A4-A772-01A-11R-A33Z-07	5.24026	Tumor
TCGA-B8-4148-01A-02R-1325-07	7.57703	Tumor
TCGA-B0-4691-01A-01R-1277-07	4.7884	Tumor
TCGA-AL-3466-01A-02R-1351-07	4.37329	Tumor
TCGA-B9-A5W7-01A-11R-A31O-07	6.664	Tumor
TCGA-CW-6090-01A-11R-1672-07	6.57515	Tumor
TCGA-DV-5568-01A-01R-1541-07	3.94482	Tumor
TCGA-F9-A7Q0-01A-11R-A36F-07	2.87161	Tumor
TCGA-BP-4165-01A-02R-1289-07	4.30899	Tumor
TCGA-B0-5703-01A-11R-1541-07	6.18758	Tumor
TCGA-DW-5561-01A-01R-1592-07	5.38174	Tumor
TCGA-EV-5903-01A-11R-1592-07	3.51835	Tumor
TCGA-B2-5635-01A-01R-A277-07	8.35624	Tumor
TCGA-CJ-4868-01A-01R-1305-07	5.54261	Tumor
TCGA-B8-4146-01B-11R-1672-07	13.3147	Tumor
TCGA-IA-A83T-01A-11R-A355-07	4.04284	Tumor
TCGA-EU-5904-01A-11R-1672-07	6.0452	Tumor
TCGA-CJ-5689-01A-11R-1541-07	4.88836	Tumor
TCGA-AK-3458-01A-01R-1503-07	5.80164	Tumor
TCGA-BP-4158-01A-02R-1289-07	6.60658	Tumor
TCGA-AK-3451-01A-02R-1188-07	3.31508	Tumor
TCGA-CZ-5463-01A-01R-1503-07	6.39319	Tumor
TCGA-A4-A57E-01A-11R-A26U-07	2.29245	Tumor
TCGA-CZ-5457-01A-01R-1503-07	5.60725	Tumor
TCGA-2Z-A9JS-01A-21R-A42S-07	5.99393	Tumor
TCGA-2Z-A9J1-01A-11R-A38C-07	7.2432	Tumor
TCGA-CZ-5454-01A-01R-1503-07	6.36859	Tumor
TCGA-BQ-5882-01A-11R-1592-07	3.57604	Tumor
TCGA-CJ-4885-01A-01R-1305-07	7.08746	Tumor
TCGA-BP-4998-01A-01R-1334-07	7.30164	Tumor
TCGA-A3-3343-01A-01R-0864-07	7.43284	Tumor
TCGA-AK-3453-01A-02R-1277-07	3.1694	Tumor
TCGA-UZ-A9PJ-01A-11R-A38C-07	7.03348	Tumor
TCGA-SX-A7SM-01A-11R-A355-07	2.25996	Tumor
TCGA-BP-5183-01A-01R-1426-07	4.47876	Tumor
TCGA-A3-3363-01A-01R-0864-07	9.49416	Tumor
TCGA-B1-A655-01A-11R-A31O-07	3.84286	Tumor
TCGA-AK-3429-01A-02R-1325-07	4.27709	Tumor
TCGA-CZ-5986-01A-11R-1672-07	8.28445	Tumor
TCGA-B0-4824-01A-01R-1277-07	6.35935	Tumor
TCGA-B4-5844-01A-11R-1672-07	7.43166	Tumor
TCGA-5P-A9JU-01A-11R-A42S-07	3.86536	Tumor
TCGA-BP-4166-01A-02R-1289-07	4.9363	Tumor
TCGA-P4-A5E8-01A-11R-A28H-07	3.33004	Tumor
TCGA-BP-4159-01A-02R-1289-07	5.08588	Tumor
TCGA-CJ-4884-01A-01R-1305-07	5.41341	Tumor
TCGA-BP-5175-01A-01R-1426-07	1.56801	Tumor
TCGA-B0-5085-01A-01R-1334-07	3.86126	Tumor
TCGA-GK-A6C7-01A-11R-A33J-07	6.55104	Tumor
TCGA-CZ-4863-01A-01R-1503-07	4.35866	Tumor
TCGA-A3-3385-01A-02R-1420-07	6.36292	Tumor
TCGA-BP-4789-01A-01R-1305-07	10.9835	Tumor
TCGA-BP-4774-01A-01R-1289-07	5.73231	Tumor
TCGA-2Z-A9JO-01A-11R-A42S-07	3.42661	Tumor
TCGA-CJ-4892-01A-01R-1305-07	6.25426	Tumor
TCGA-4A-A93Y-01A-11R-A37K-07	4.2734	Tumor
TCGA-DV-A4W0-01A-11R-A266-07	7.35667	Tumor
TCGA-KV-A6GE-01A-11R-A31O-07	4.34058	Tumor
TCGA-B8-4151-01A-01R-1188-07	8.07867	Tumor
TCGA-B0-4693-01A-01R-1277-07	7.28511	Tumor
TCGA-IA-A40Y-01A-11R-A24Z-07	3.78291	Tumor
TCGA-CJ-4888-01A-01R-1305-07	4.4225	Tumor
TCGA-B4-5832-01A-11R-1672-07	8.06921	Tumor
TCGA-UN-AAZ9-01A-11R-A38C-07	7.27191	Tumor
TCGA-A3-3316-01A-01R-0864-07	6.15178	Tumor
TCGA-B0-4700-01A-02R-1541-07	3.48783	Tumor
TCGA-B9-A8YH-01A-11R-A37K-07	6.24474	Tumor
TCGA-BP-4986-01A-01R-1334-07	7.04828	Tumor
TCGA-BP-5202-01A-02R-1426-07	6.11766	Tumor
TCGA-UZ-A9PZ-01A-11R-A42S-07	5.05096	Tumor
TCGA-B8-5158-01A-01R-1420-07	4.30103	Tumor
TCGA-BP-4781-01A-01R-1305-07	5.52282	Tumor
TCGA-A4-8630-01A-11R-2404-07	5.0726	Tumor
TCGA-BQ-5878-01A-11R-1592-07	7.8317	Tumor
TCGA-A3-3319-01A-02R-1325-07	2.37699	Tumor
TCGA-B0-5080-01A-01R-1503-07	6.09337	Tumor
TCGA-B8-A54H-01A-11R-A33J-07	6.03575	Tumor
TCGA-BP-4340-01A-01R-1289-07	6.80304	Tumor
TCGA-CZ-5458-01A-01R-1503-07	5.97966	Tumor
TCGA-5P-A9JW-01A-11R-A42S-07	1.74212	Tumor
TCGA-B3-3925-01A-02R-1351-07	9.12451	Tumor
TCGA-BP-4974-01A-01R-1334-07	7.3306	Tumor
TCGA-B2-4101-01A-02R-1277-07	6.54238	Tumor
TCGA-BP-4776-01A-01R-1289-07	4.673	Tumor
TCGA-G7-6790-01A-11R-1965-07	6.63707	Tumor
TCGA-CJ-4905-01A-02R-1426-07	8.83373	Tumor
TCGA-G7-6792-01A-21R-1965-07	5.32248	Tumor
TCGA-BQ-7044-01A-11R-1965-07	2.64275	Tumor
TCGA-BP-5194-01A-02R-1426-07	6.76416	Tumor
TCGA-CJ-4874-01A-01R-1305-07	6.36938	Tumor
TCGA-BP-5185-01A-01R-1426-07	2.06589	Tumor
TCGA-GL-A9DC-01A-11R-A37K-07	5.71444	Tumor
TCGA-SX-A7SS-01A-11R-A36F-07	5.17964	Tumor
TCGA-CZ-5469-01A-01R-1503-07	3.98208	Tumor
TCGA-AL-A5DJ-01A-11R-A26U-07	4.22335	Tumor
TCGA-GL-A59T-01A-21R-A28H-07	3.16982	Tumor
TCGA-B8-A54G-01A-11R-A266-07	5.44827	Tumor
TCGA-DZ-6132-01A-11R-1965-07	5.32819	Tumor
TCGA-B0-5402-01A-01R-1503-07	6.35416	Tumor
TCGA-CZ-5988-01A-11R-1672-07	4.29749	Tumor
TCGA-AK-3436-01A-02R-1325-07	3.03668	Tumor
TCGA-BP-4797-01A-01R-1305-07	4.43057	Tumor
TCGA-G6-A5PC-01A-11R-A33J-07	2.98209	Tumor
TCGA-SX-A7SQ-01A-12R-A36F-07	4.9101	Tumor
TCGA-B8-A54J-01A-11R-A33J-07	5.79885	Tumor
TCGA-BP-4959-01A-01R-1334-07	5.32943	Tumor
TCGA-CZ-5467-01A-01R-1503-07	9.8775	Tumor
TCGA-B1-A47M-01A-11R-A24Z-07	4.56712	Tumor
TCGA-CZ-4864-01A-01R-1503-07	7.08811	Tumor
TCGA-GL-A9DD-01A-11R-A37K-07	4.09609	Tumor
TCGA-DW-7838-01A-11R-2139-07	4.50856	Tumor
TCGA-CJ-4634-01A-02R-1325-07	8.40052	Tumor
TCGA-BP-4973-01A-01R-1334-07	6.58828	Tumor
TCGA-Y8-A8RZ-01A-11R-A37K-07	4.21672	Tumor
TCGA-BP-4975-01A-01R-1334-07	7.30887	Tumor
TCGA-B0-4847-01A-01R-1277-07	3.25705	Tumor
TCGA-CJ-5677-01A-11R-1541-07	2.80143	Tumor
TCGA-CW-5585-01A-01R-1541-07	11.8303	Tumor
TCGA-DW-7839-01A-11R-2139-07	9.31824	Tumor
TCGA-A3-3326-01A-01R-0864-07	6.4146	Tumor
TCGA-CJ-4891-01A-01R-1305-07	3.01036	Tumor
TCGA-CJ-5684-01A-11R-1541-07	5.61285	Tumor
TCGA-MH-A562-01A-11R-A26U-07	4.39395	Tumor
TCGA-MH-A854-01A-11R-A355-07	3.90995	Tumor
TCGA-F9-A7VF-01A-11R-A33Z-07	3.75304	Tumor
TCGA-BP-4763-01A-01R-1289-07	5.86323	Tumor
TCGA-B8-4622-01A-02R-1277-07	7.27232	Tumor
TCGA-F9-A8NY-01A-11R-A36F-07	5.51748	Tumor
TCGA-AK-3450-01A-02R-1277-07	5.76079	Tumor
TCGA-MH-A55W-01A-11R-A26U-07	5.36315	Tumor
TCGA-CJ-4894-01A-01R-1305-07	8.29826	Tumor
TCGA-B0-4836-01A-01R-1305-07	4.24181	Tumor
TCGA-A3-3322-01A-02R-1325-07	6.48055	Tumor
TCGA-CZ-5982-01A-11R-1672-07	8.27479	Tumor
TCGA-CJ-6028-01A-11R-1672-07	4.6392	Tumor
TCGA-BP-5169-01A-01R-1426-07	1.60009	Tumor
TCGA-B0-4819-01A-01R-1277-07	4.21262	Tumor
TCGA-A4-8312-01A-11R-2404-07	4.77969	Tumor
TCGA-A4-7288-01A-11R-A32Z-07	5.10736	Tumor
TCGA-A3-3359-01A-01R-0864-07	8.43022	Tumor
TCGA-BP-4803-01A-01R-1305-07	5.02076	Tumor
TCGA-A3-A6NL-01A-11R-A33J-07	5.54695	Tumor
TCGA-B0-4701-01A-01R-1277-07	6.0177	Tumor
TCGA-CJ-4903-01A-01R-1426-07	5.12523	Tumor
TCGA-CW-5588-01A-01R-1541-07	3.91518	Tumor
TCGA-B0-4821-01A-01R-1503-07	2.70855	Tumor
TCGA-DV-A4VZ-01A-11R-A266-07	6.49136	Tumor
TCGA-BP-5199-01A-01R-1426-07	6.45193	Tumor
TCGA-B9-4117-01A-02R-1351-07	5.68152	Tumor
TCGA-BP-5186-01A-01R-1426-07	7.61454	Tumor
TCGA-2Z-A9JJ-01A-11R-A42S-07	2.60184	Tumor
TCGA-SX-A71R-01A-12R-A33Z-07	4.78024	Tumor
TCGA-B0-4817-01A-01R-1277-07	3.24267	Tumor
TCGA-UZ-A9PM-01A-21R-A38C-07	4.21854	Tumor
TCGA-B2-5633-01B-04R-A277-07	17.4811	Tumor
TCGA-CW-6088-01A-11R-1672-07	8.4881	Tumor
TCGA-B0-4816-01A-01R-1503-07	5.85376	Tumor
TCGA-A3-3329-01A-01R-0864-07	8.77677	Tumor
TCGA-AK-3433-01A-02R-1277-07	10.8866	Tumor
TCGA-BP-5010-01A-02R-1420-07	3.6537	Tumor
TCGA-CZ-5455-01A-01R-1503-07	6.47683	Tumor
TCGA-DV-A4VX-01A-11R-A266-07	2.56555	Tumor
TCGA-CJ-4873-01A-01R-1305-07	2.56397	Tumor
TCGA-5P-A9K9-01A-11R-A42S-07	3.38818	Tumor
TCGA-HE-A5NK-01A-11R-A26U-07	4.89118	Tumor
TCGA-Q2-A5QZ-01A-11R-A28H-07	2.22554	Tumor
TCGA-B0-5094-01A-01R-1420-07	5.03465	Tumor
TCGA-B8-4621-01A-01R-1503-07	2.69131	Tumor
TCGA-BQ-7060-01A-11R-1965-07	4.13572	Tumor
TCGA-BP-4784-01A-01R-1305-07	8.15923	Tumor
TCGA-CZ-5470-01A-01R-1503-07	4.48655	Tumor
TCGA-CZ-5462-01A-01R-1503-07	5.01888	Tumor
TCGA-KV-A6GD-01A-11R-A31O-07	4.19426	Tumor
TCGA-MM-A564-01A-11R-A266-07	5.22743	Tumor
TCGA-CZ-5465-01A-01R-1503-07	7.08264	Tumor
TCGA-B0-5107-01A-01R-1420-07	5.31785	Tumor
TCGA-B1-5398-01A-02R-1592-07	3.41852	Tumor
TCGA-B4-5378-01A-01R-1503-07	7.85919	Tumor
TCGA-B0-4838-01A-01R-1305-07	6.67684	Tumor
TCGA-A4-8517-01A-11R-2404-07	5.02615	Tumor
TCGA-B0-4842-01A-02R-1420-07	3.11279	Tumor
TCGA-5P-A9K2-01A-11R-A42S-07	2.58629	Tumor
TCGA-B1-A656-01A-11R-A31O-07	2.22698	Tumor
TCGA-2K-A9WE-01A-11R-A38C-07	3.64782	Tumor
TCGA-CW-5590-01A-01R-1541-07	5.67059	Tumor
TCGA-BP-4968-01A-01R-1334-07	6.30772	Tumor
TCGA-2Z-A9J2-01A-11R-A38C-07	2.72957	Tumor
TCGA-DZ-6135-01A-11R-1965-07	7.31733	Tumor
TCGA-B0-5088-01A-01R-1334-07	4.65966	Tumor
TCGA-CZ-5452-01A-01R-1503-07	4.90277	Tumor
TCGA-IZ-A6M8-01A-11R-A31O-07	3.17854	Tumor
TCGA-B0-5120-01A-01R-1420-07	5.94986	Tumor
TCGA-A4-7583-01A-11R-A32Z-07	6.59904	Tumor
TCGA-5P-A9K4-01A-11R-A42S-07	4.67518	Tumor
TCGA-AK-3455-01A-01R-0864-07	6.52069	Tumor
TCGA-BP-4983-01A-01R-1334-07	5.67344	Tumor
TCGA-BP-4787-01A-01R-1305-07	3.6356	Tumor
TCGA-A3-3383-01A-02R-1325-07	6.37136	Tumor
TCGA-AK-3456-01A-02R-1325-07	6.12806	Tumor
TCGA-IA-A83V-01A-11R-A355-07	3.94033	Tumor
TCGA-B2-3924-01B-03R-A277-07	17.8671	Tumor
TCGA-CJ-4900-01A-01R-1334-07	5.47935	Tumor
TCGA-B0-4845-01A-01R-1277-07	5.55016	Tumor
TCGA-AK-3445-01A-02R-1277-07	4.50176	Tumor
TCGA-A3-3358-01A-01R-1541-07	5.73112	Tumor
TCGA-CJ-4643-01A-02R-1325-07	7.29104	Tumor
TCGA-BQ-7062-01A-11R-1965-07	4.95586	Tumor
TCGA-A3-3313-01A-02R-1325-07	4.4003	Tumor
TCGA-HE-7128-01A-11R-1965-07	4.74036	Tumor
TCGA-A3-A8OV-01A-11R-A37O-07	5.99783	Tumor
TCGA-MW-A4EC-01A-11R-A266-07	5.56058	Tumor
TCGA-B0-4834-01A-01R-1305-07	7.96016	Tumor
TCGA-CW-6093-01A-11R-1672-07	8.40301	Tumor
TCGA-AL-3468-01A-02R-1351-07	3.99278	Tumor
TCGA-UZ-A9PU-01A-11R-A42S-07	6.56745	Tumor
TCGA-2Z-A9J7-01A-11R-A38C-07	4.88796	Tumor
TCGA-BQ-5876-01A-11R-1592-07	6.5333	Tumor
TCGA-BQ-7056-01A-11R-1965-07	4.61672	Tumor
TCGA-BP-4761-01A-01R-1289-07	1.97169	Tumor
TCGA-5P-A9K8-01A-11R-A42S-07	5.32947	Tumor
TCGA-UZ-A9PP-01A-11R-A42S-07	5.22159	Tumor
TCGA-B0-4945-01A-01R-1420-07	4.99604	Tumor
TCGA-CW-5581-01A-02R-1541-07	5.1397	Tumor
TCGA-A3-3387-01A-01R-1541-07	5.26103	Tumor
TCGA-B0-5081-01A-01R-1334-07	4.32391	Tumor
TCGA-AL-7173-01A-11R-2139-07	4.25091	Tumor
TCGA-EU-5907-01A-11R-1672-07	6.36226	Tumor
TCGA-BP-5170-01A-01R-1426-07	3.76768	Tumor
TCGA-BQ-7046-01A-11R-1965-07	3.97419	Tumor
TCGA-B2-4098-01A-02R-1325-07	2.8097	Tumor
TCGA-AK-3431-01A-02R-1277-07	8.23291	Tumor
TCGA-BP-4963-01A-01R-1334-07	6.25145	Tumor
TCGA-UZ-A9PO-01A-11R-A38C-07	3.96937	Tumor
TCGA-Y8-A897-01A-11R-A36F-07	5.1271	Tumor
TCGA-CJ-4897-01A-03R-1426-07	7.42078	Tumor
TCGA-UZ-A9PL-01A-11R-A38C-07	5.07929	Tumor
TCGA-AL-3467-01A-02R-1351-07	11.7639	Tumor
TCGA-CW-5580-01A-01R-1672-07	6.66572	Tumor
TCGA-B2-5635-01B-04R-A277-07	15.0699	Tumor
TCGA-BP-4962-01A-01R-1334-07	4.22313	Tumor
TCGA-G7-7502-01A-11R-2204-07	7.26089	Tumor
TCGA-BP-4330-01A-01R-1289-07	6.99792	Tumor
TCGA-B0-4811-01A-01R-1503-07	3.67183	Tumor
TCGA-A4-A48D-01A-11R-A24Z-07	2.47253	Tumor
TCGA-B0-5400-01A-01R-1503-07	3.04525	Tumor
TCGA-B8-A54D-01A-21R-A266-07	5.8564	Tumor
TCGA-BP-4969-01A-01R-1334-07	4.18541	Tumor
TCGA-BP-4985-01A-01R-1334-07	3.38427	Tumor
TCGA-UZ-A9PX-01A-11R-A42S-07	6.29935	Tumor
TCGA-B0-5100-01A-01R-1420-07	6.08387	Tumor
TCGA-CZ-5464-01A-01R-1503-07	4.52107	Tumor
TCGA-BQ-7049-01A-11R-1965-07	5.9562	Tumor
TCGA-CZ-4865-01A-02R-1503-07	5.38912	Tumor
TCGA-B2-5633-01A-01R-A277-07	9.45231	Tumor
TCGA-AK-3425-01A-02R-1277-07	4.61325	Tumor
TCGA-BP-4167-01A-02R-1325-07	3.28643	Tumor
TCGA-2Z-A9JI-01A-11R-A42S-07	3.75735	Tumor
TCGA-AL-3473-01A-01R-1193-07	5.35433	Tumor
TCGA-BP-4338-01A-01R-1289-07	2.35531	Tumor
TCGA-A4-7287-01A-11R-2139-07	3.345	Tumor
TCGA-UZ-A9PN-01A-11R-A38C-07	5.97289	Tumor
TCGA-BP-4799-01A-01R-1305-07	3.98428	Tumor
TCGA-B4-5834-01A-11R-1672-07	7.95708	Tumor
TCGA-CZ-4853-01A-01R-1426-07	6.08375	Tumor
TCGA-SX-A71S-01A-11R-A33Z-07	7.99341	Tumor
TCGA-O9-A75Z-01A-11R-A33Z-07	6.68236	Tumor
TCGA-G7-A8LC-01A-11R-A36F-07	5.47362	Tumor
TCGA-J7-6720-01A-11R-2139-07	5.87492	Tumor
TCGA-B0-5099-01A-01R-1420-07	6.55592	Tumor
TCGA-BP-4349-01A-01R-1289-07	5.26374	Tumor
TCGA-B0-5690-01A-11R-1541-07	5.6683	Tumor
TCGA-B0-4839-01A-01R-1305-07	3.44734	Tumor
TCGA-B9-A5W8-01A-11R-A28H-07	5.16496	Tumor
TCGA-B0-4718-01A-01R-1277-07	5.20756	Tumor
TCGA-B0-5075-01A-01R-1334-07	5.96363	Tumor
TCGA-BP-5198-01A-01R-1426-07	3.62971	Tumor
TCGA-A3-3376-01A-02R-1420-07	8.04381	Tumor
TCGA-B8-A54I-01A-21R-A33J-07	2.57612	Tumor
TCGA-P4-A5EB-01A-11R-A28H-07	4.59763	Tumor
TCGA-DV-5575-01A-01R-1541-07	7.19756	Tumor
TCGA-A4-8311-01A-11R-2404-07	5.27948	Tumor
TCGA-BP-4770-01A-01R-1503-07	7.16107	Tumor
TCGA-B0-4846-01A-01R-1277-07	7.44185	Tumor
TCGA-GL-A4EM-01A-11R-A24Z-07	2.00705	Tumor
TCGA-DZ-6134-01A-11R-1965-07	5.00431	Tumor
TCGA-B0-4848-01A-01R-1277-07	4.91999	Tumor
TCGA-CW-5587-01A-01R-1541-07	5.82266	Tumor
TCGA-CJ-4638-01A-02R-1325-07	3.43767	Tumor
TCGA-BP-4345-01A-01R-1289-07	5.28228	Tumor
TCGA-F9-A97G-01A-11R-A38C-07	2.37911	Tumor
TCGA-B1-7332-01A-11R-A32Z-07	3.30549	Tumor
TCGA-B0-5106-01A-01R-1420-07	5.56217	Tumor
TCGA-BP-5195-01A-02R-1426-07	5.04128	Tumor
TCGA-CJ-4918-01A-01R-1426-07	5.40345	Tumor
TCGA-MH-A857-01A-11R-A355-07	5.10526	Tumor
TCGA-B1-A654-01A-11R-A31O-07	5.71285	Tumor
TCGA-B0-4690-01A-01R-1277-07	4.84715	Tumor
TCGA-BP-5182-01A-01R-1426-07	3.79574	Tumor
TCGA-BP-4762-01A-02R-1289-07	6.76108	Tumor
TCGA-BP-4176-01A-02R-1289-07	5.39975	Tumor
TCGA-BP-4169-01A-02R-1289-07	5.78339	Tumor
TCGA-BP-4760-01A-02R-1420-07	7.41242	Tumor
TCGA-5P-A9KC-01A-11R-A42S-07	3.7166	Tumor
TCGA-A3-3374-01A-02R-1325-07	5.40218	Tumor
TCGA-BP-5191-01A-01R-1426-07	1.51529	Tumor
TCGA-B8-4619-01A-02R-1325-07	6.39702	Tumor
TCGA-B0-4810-01A-01R-1503-07	5.73693	Tumor
TCGA-B1-A47O-01A-11R-A24Z-07	2.61224	Tumor
TCGA-B2-3923-01A-02R-A277-07	11.1158	Tumor
TCGA-CW-5591-01A-01R-1541-07	7.90984	Tumor
TCGA-BP-5201-01A-01R-1426-07	3.90148	Tumor
TCGA-AS-3777-01A-01R-0864-07	4.52043	Tumor
TCGA-BP-4758-01A-01R-1289-07	3.88596	Tumor
TCGA-B8-4620-01A-02R-1325-07	3.64065	Tumor
TCGA-2Z-A9J3-01A-12R-A38C-07	3.87311	Tumor
TCGA-BP-4326-01A-01R-1289-07	4.66746	Tumor
TCGA-BQ-7055-01A-11R-1965-07	6.25968	Tumor
TCGA-B0-4852-01A-01R-1503-07	7.75385	Tumor
TCGA-B2-3923-01B-10R-A277-07	22.4092	Tumor
TCGA-B2-5633-01A-01R-1541-07	7.77074	Tumor
TCGA-B0-4844-01A-01R-1277-07	1.7113	Tumor
TCGA-BQ-5894-01A-11R-1592-07	4.24088	Tumor
TCGA-CJ-4887-01A-01R-1305-07	4.13201	Tumor
TCGA-5P-A9KH-01A-11R-A42S-07	7.29917	Tumor
TCGA-G7-A8LD-01A-11R-A36F-07	4.58632	Tumor
TCGA-BQ-5885-01A-11R-1592-07	3.95303	Tumor
TCGA-BP-4332-01A-01R-1289-07	9.45172	Tumor
