# Supplementary material for: Sunitinib-suppressed miR-452-5p facilitates renal cancer cell invasion and metastasis through modulating SMAD4/SMAD7 signals
Source: Mol Cancer. 2018 Nov 12;17:157. doi: 10.1186/s12943-018-0906-x (PMC6231268; doi:10.1186/s12943-018-0906-x)
Supplement: Supplementary file 12 — Table S12. SMAD4 expression in RCC and normal renal samples from TCGA RCC dataset. (XLSX 40 kb) [file 12943_2018_906_MOESM12_ESM.xlsx]

## Sheet: Sheet1
Table S12. SMAD4 expression and paitients' survival time from RCC TCGA dataset according to www.proteinatlas.org
Sample	Description	FPKM
TCGA-B2-5633-01B	56 years, male, white, stage:i	17.5
TCGA-CZ-5989-01A	60 years, male, white, stage:ii	13.6
TCGA-B8-4146-01B	41 years, female, white, stage:i	13.3
TCGA-CW-5585-01A	51 years, male, white, stage:iv	11.8
TCGA-BP-4789-01A	48 years, male, white, stage:i	11
TCGA-AK-3433-01A	48 years, female, white, stage:ii	10.9
TCGA-CW-5583-01A	51 years, female, white, stage:i	10.5
TCGA-BP-4177-01A	65 years, male, white, stage:i	10.2
TCGA-CZ-5467-01A	86 years, female, white, stage:iii	9.9
TCGA-A3-3365-01A	46 years, male, white, stage:i	9.6
TCGA-B2-3924-01A	73 years, male, white, stage:i	9.6
TCGA-A3-3363-01A	50 years, male, asian, stage:ii	9.5
TCGA-BP-4332-01A	36 years, male, white, stage:iii	9.5
TCGA-BP-4790-01A	76 years, male, white, stage:i	9
TCGA-B2-A4SR-01A	62 years, male, black or african american, stage:ii	9
TCGA-A3-3328-01A	79 years, male, white, stage:i	8.9
TCGA-BP-4991-01A	54 years, male, white, stage:i	8.8
TCGA-CJ-4905-01A	62 years, female, white, stage:i	8.8
TCGA-A3-3329-01A	75 years, male, white, stage:i	8.8
TCGA-B2-5636-01A	79 years, male, white, stage:i	8.6
TCGA-A3-3380-01A	54 years, male, stage:i	8.5
TCGA-A3-3307-01A	66 years, male, stage:iii	8.5
TCGA-CW-6088-01A	60 years, male, white, stage:i	8.5
TCGA-A3-3320-01A	52 years, female, white, stage:i	8.5
TCGA-BP-4987-01A	41 years, female, asian, stage:i	8.4
TCGA-BP-4965-01A	46 years, male, white, stage:i	8.4
TCGA-A3-3359-01A	82 years, female, white, stage:i	8.4
TCGA-CW-6093-01A	73 years, male, white, stage:i	8.4
TCGA-CJ-4634-01A	60 years, female, white, stage:i	8.4
TCGA-AK-3428-01A	62 years, male, white, stage:iii	8.4
TCGA-B2-5635-01A	74 years, male, white, stage:i	8.4
TCGA-B0-5693-01A	47 years, female, white, stage:i	8.4
TCGA-CJ-4894-01A	58 years, male, white, stage:iii	8.3
TCGA-CZ-5986-01A	61 years, male, white, stage:i	8.3
TCGA-CZ-5982-01A	59 years, female, white, stage:i	8.3
TCGA-CJ-4899-01A	42 years, male, asian, stage:i	8.3
TCGA-AK-3431-01A	62 years, female, white, stage:ii	8.2
TCGA-DV-5567-01A	40 years, female, black or african american, stage:i	8.2
TCGA-BP-4784-01A	67 years, female, white, stage:i	8.2
TCGA-B0-5113-01A	69 years, female, white, stage:iii	8.2
TCGA-AK-3443-01A	45 years, male, white, stage:ii	8.1
TCGA-B8-4151-01A	51 years, female, white, stage:iii	8.1
TCGA-B2-3923-01A	59 years, male, white, stage:ii	8.1
TCGA-B4-5832-01A	65 years, male, white, stage:iii	8.1
TCGA-A3-3376-01A	51 years, male, black or african american, stage:i	8
TCGA-B0-5812-01A	53 years, male, white, stage:i	8
TCGA-AK-3461-01A	72 years, male, white, stage:i	8
TCGA-B0-4834-01A	49 years, male, white, stage:i	8
TCGA-B4-5834-01A	59 years, male, white, stage:i	8
TCGA-CW-5591-01A	56 years, male, white, stage:iv	7.9
TCGA-CJ-4639-01A	49 years, female, white, stage:ii	7.9
TCGA-BP-4982-01A	42 years, male, white, stage:i	7.9
TCGA-BP-4769-01A	63 years, male, white, stage:i	7.9
TCGA-B8-5546-01A	38 years, female, black or african american, stage:i	7.9
TCGA-B4-5378-01A	62 years, male, white, stage:i	7.9
TCGA-BP-4342-01A	79 years, male, white, stage:ii	7.8
TCGA-CZ-4862-01A	46 years, male, white, stage:i	7.8
TCGA-BP-4999-01A	56 years, male, white, stage:i	7.8
TCGA-B0-4852-01A	78 years, female, white, stage:ii	7.8
TCGA-BP-4972-01A	43 years, female, white, stage:iii	7.7
TCGA-CJ-4635-01A	48 years, male, white, stage:i	7.7
TCGA-DV-5576-01A	55 years, female, black or african american, stage:i	7.7
TCGA-B0-5110-01A	71 years, female, white, stage:i	7.7
TCGA-CJ-4878-01A	71 years, female, white, stage:iii	7.6
TCGA-BP-5186-01A	50 years, female, white, stage:i	7.6
TCGA-B0-4710-01A	75 years, female, white, stage:iii	7.6
TCGA-BP-4961-01A	47 years, male, white, stage:i	7.6
TCGA-A3-3352-01A	male, white, stage:iii	7.6
TCGA-B8-4148-01A	63 years, female, white, stage:i	7.6
TCGA-A3-3317-01A	67 years, male, stage:ii	7.5
TCGA-A3-3325-01A	52 years, male, white, stage:i	7.5
TCGA-A3-3382-01A	69 years, male, white, stage:i	7.5
TCGA-BP-4325-01A	64 years, female, white, stage:i	7.5
TCGA-B0-5691-01A	66 years, female, white, stage:i	7.5
TCGA-CJ-5681-01A	44 years, female, white, stage:iv	7.5
TCGA-BP-4765-01A	43 years, male, white, stage:i	7.5
TCGA-B0-4846-01A	52 years, male, white, stage:iv	7.4
TCGA-A3-3351-01A	42 years, male, white, stage:ii	7.4
TCGA-A3-3343-01A	79 years, male, white, stage:ii	7.4
TCGA-B4-5844-01A	61 years, female, white, stage:ii	7.4
TCGA-A3-3373-01A	54 years, female, white, stage:i	7.4
TCGA-CJ-4897-01A	79 years, female, white, stage:iii	7.4
TCGA-BP-4760-01A	69 years, male, black or african american, stage:i	7.4
TCGA-B8-A54K-01A	61 years, male, black or african american, stage:i	7.4
TCGA-B0-5119-01A	61 years, female, white, stage:i	7.4
TCGA-BP-4344-01A	75 years, female, white, stage:i	7.4
TCGA-BP-5004-01A	53 years, male, white, stage:i	7.4
TCGA-B8-5545-01A	42 years, male, black or african american, stage:i	7.4
TCGA-DV-A4W0-01A	55 years, male, black or african american, stage:i	7.4
TCGA-CJ-4886-01A	43 years, female, white, stage:i	7.4
TCGA-BP-4974-01A	58 years, male, white, stage:iv	7.3
TCGA-BP-4975-01A	40 years, male, white, stage:i	7.3
TCGA-CJ-4895-01A	62 years, male, white, stage:iv	7.3
TCGA-BP-4998-01A	49 years, male, asian, stage:i	7.3
TCGA-BP-4970-01A	44 years, male, asian, stage:iii	7.3
TCGA-CJ-4643-01A	67 years, female, white, stage:ii	7.3
TCGA-B0-4693-01A	73 years, female, white, stage:iii	7.3
TCGA-B8-4622-01A	57 years, male, white, stage:iv	7.3
TCGA-B0-5699-01A	53 years, male, white, stage:i	7.2
TCGA-DV-5575-01A	52 years, female, white, stage:i	7.2
TCGA-BP-4995-01A	68 years, male, white, stage:i	7.2
TCGA-A3-A8CQ-01A	59 years, female, black or african american, stage:i	7.2
TCGA-A3-3306-01A	67 years, male, white, stage:i	7.2
TCGA-BP-5007-01A	46 years, male, white, stage:ii	7.2
TCGA-BP-4770-01A	73 years, female, white, stage:iv	7.2
TCGA-B0-4849-01A	51 years, male, white, stage:iii	7.2
TCGA-B4-5843-01A	45 years, male, white, stage:i	7.2
TCGA-CJ-4908-01A	38 years, male, white, stage:i	7.1
TCGA-CZ-4864-01A	86 years, male, white, stage:ii	7.1
TCGA-AS-3778-01A	35 years, male, white, stage:i	7.1
TCGA-A3-A6NN-01A	78 years, male, black or african american, stage:i	7.1
TCGA-CJ-4885-01A	64 years, male, white, stage:iv	7.1
TCGA-CZ-5465-01A	76 years, female, stage:iii	7.1
TCGA-B8-5165-01A	43 years, male, white, stage:i	7.1
TCGA-B0-5104-01A	90 years, female, white, stage:i	7.1
TCGA-BP-4807-01A	42 years, male, white, stage:i	7.1
TCGA-B2-4099-01A	83 years, male, white, stage:i	7.1
TCGA-BP-4986-01A	75 years, male, white, stage:i	7
TCGA-A3-3331-01A	86 years, female, white, stage:i	7
TCGA-BP-4775-01A	55 years, female, white, stage:i	7
TCGA-B0-5083-01A	63 years, male, white, stage:i	7
TCGA-BP-4330-01A	60 years, female, black or african american, stage:iii	7
TCGA-EU-5906-01A	55 years, male, white, stage:i	7
TCGA-BP-5008-01A	46 years, male, white, stage:i	6.9
TCGA-T7-A92I-01A	47 years, female, black or african american, stage:i	6.9
TCGA-A3-3349-01A	34 years, female, white, stage:i	6.9
TCGA-B0-5710-01A	57 years, male, white, stage:i	6.9
TCGA-A3-3370-01A	48 years, female, white, stage:i	6.9
TCGA-BP-5184-01A	54 years, male, white, stage:i	6.9
TCGA-BP-4976-01A	77 years, male, white, stage:i	6.9
TCGA-B4-5377-01A	68 years, female, white, stage:iv	6.9
TCGA-BP-4964-01A	55 years, female, white, stage:i	6.8
TCGA-B8-5552-01B	41 years, female, white, stage:i	6.8
TCGA-BP-4795-01A	74 years, female, white, stage:i	6.8
TCGA-BP-4340-01A	70 years, female, white, stage:i	6.8
TCGA-A3-A8OW-01A	37 years, male, black or african american, stage:iii	6.8
TCGA-B0-5709-01A	62 years, female, white, stage:iii	6.8
TCGA-CJ-4642-01B	47 years, male, white, stage:ii	6.8
TCGA-BP-4164-01A	51 years, female, white, stage:iii	6.8
TCGA-BP-5194-01A	39 years, male, white, stage:i	6.8
TCGA-BP-4762-01A	42 years, male, white, stage:i	6.8
TCGA-BP-4354-01A	41 years, male, white, stage:iv	6.8
TCGA-B0-4838-01A	69 years, female, white, stage:i	6.7
TCGA-CZ-4859-01A	59 years, female, white, stage:i	6.7
TCGA-CW-5580-01A	73 years, female, white, stage:iv	6.7
TCGA-BP-5192-01A	59 years, male, white, stage:i	6.6
TCGA-AK-3460-01A	58 years, male, white, stage:i	6.6
TCGA-BP-4158-01A	69 years, male, white, stage:i	6.6
TCGA-CJ-4889-01A	63 years, female, white, stage:i	6.6
TCGA-BP-4973-01A	47 years, male, white, stage:iii	6.6
TCGA-BP-4994-01A	54 years, male, white, stage:i	6.6
TCGA-CW-6090-01A	68 years, male, white, stage:i	6.6
TCGA-B0-5099-01A	88 years, female, white, stage:iii	6.6
TCGA-GK-A6C7-01A	77 years, female, black or african american, stage:i	6.6
TCGA-B2-4101-01A	52 years, male, white, stage:ii	6.5
TCGA-G6-A8L8-01A	62 years, female, black or african american, stage:i	6.5
TCGA-AK-3455-01A	71 years, female, white, stage:iii	6.5
TCGA-B8-5159-01A	61 years, female, white, stage:i	6.5
TCGA-A3-3362-01A	60 years, female, white, stage:i	6.5
TCGA-A3-3311-01A	58 years, male, stage:i	6.5
TCGA-DV-5573-01A	41 years, male, white, stage:i	6.5
TCGA-B0-5711-01A	50 years, male, white, stage:iii	6.5
TCGA-DV-A4VZ-01A	53 years, male, black or african american, stage:i	6.5
TCGA-A3-3322-01A	51 years, male, white, stage:i	6.5
TCGA-CZ-5455-01A	63 years, male, white, stage:iv	6.5
TCGA-BP-4329-01A	75 years, male, white, stage:iii	6.5
TCGA-BP-5199-01A	58 years, male, white, stage:ii	6.5
TCGA-A3-3367-01A	72 years, male, white, stage:i	6.4
TCGA-BP-4346-01A	57 years, male, white, stage:iii	6.4
TCGA-B4-5838-01A	52 years, male, white	6.4
TCGA-A3-3326-01A	47 years, male, white, stage:i	6.4
TCGA-B0-5095-01A	81 years, male, white, stage:iii	6.4
TCGA-B0-5695-01A	61 years, female, white, stage:i	6.4
TCGA-B8-4619-01A	58 years, male, white, stage:i	6.4
TCGA-CZ-5463-01A	76 years, male, white, stage:ii	6.4
TCGA-CJ-5680-01A	65 years, female, white, stage:iv	6.4
TCGA-A3-3383-01A	52 years, male, white, stage:i	6.4
TCGA-CJ-4874-01A	73 years, female, white, stage:i	6.4
TCGA-CZ-5454-01A	63 years, male, white, stage:iv	6.4
TCGA-A3-3385-01A	46 years, female, white, stage:i	6.4
TCGA-EU-5907-01A	81 years, male, white, stage:iii	6.4
TCGA-B0-4824-01A	49 years, female, white, stage:i	6.4
TCGA-B0-5402-01A	64 years, male, white, stage:iv	6.4
TCGA-B8-5164-01A	65 years, male, white, stage:iii	6.3
TCGA-B0-5713-01A	75 years, female, white, stage:iii	6.3
TCGA-AK-3434-01A	72 years, male, white, stage:i	6.3
TCGA-BP-4968-01A	40 years, male, white, stage:i	6.3
TCGA-CJ-4640-01A	49 years, male, white, stage:iii	6.3
TCGA-BP-4331-01A	52 years, male, white, stage:i	6.3
TCGA-B0-5698-01A	77 years, male, black or african american, stage:i	6.3
TCGA-CJ-4892-01A	65 years, female, white, stage:i	6.3
TCGA-B0-5108-01A	54 years, male, white, stage:iii	6.3
TCGA-BP-4963-01A	64 years, male, white, stage:i	6.3
TCGA-CJ-4904-01A	60 years, female, white, stage:iv	6.3
TCGA-BP-4768-01A	72 years, female, white, stage:i	6.2
TCGA-B2-4102-01A	61 years, male, white, stage:i	6.2
TCGA-BP-5168-01A	75 years, male, white, stage:i	6.2
TCGA-AK-3427-01A	65 years, male, white, stage:i	6.2
TCGA-B0-5703-01A	73 years, male, white, stage:i	6.2
TCGA-B0-5102-01A	74 years, female, white, stage:i	6.2
TCGA-BP-4334-01A	56 years, male, white, stage:iii	6.2
TCGA-CW-6087-01A	61 years, male, white, stage:iv	6.2
TCGA-BP-4351-01A	51 years, female, white, stage:iii	6.2
TCGA-A3-3316-01A	57 years, male, white, stage:ii	6.2
TCGA-B0-4823-01A	88 years, male, white, stage:i	6.1
TCGA-CW-5589-01A	52 years, male, white, stage:i	6.1
TCGA-AK-3456-01A	48 years, male, black or african american, stage:ii	6.1
TCGA-B0-4818-01A	68 years, female, white, stage:ii	6.1
TCGA-BP-5202-01A	75 years, male, white, stage:iii	6.1
TCGA-BP-5006-01A	61 years, male, white, stage:i	6.1
TCGA-B0-4814-01A	58 years, male, white, stage:iv	6.1
TCGA-B0-5115-01A	43 years, male, white, stage:iv	6.1
TCGA-B0-5080-01A	63 years, male, white, stage:iv	6.1
TCGA-BP-4766-01A	43 years, female, white, stage:i	6.1
TCGA-B0-5100-01A	72 years, male, black or african american, stage:iii	6.1
TCGA-CZ-4853-01A	82 years, male, white, stage:i	6.1
TCGA-BP-4355-01A	59 years, female, white, stage:iii	6.1
TCGA-CZ-5461-01A	52 years, male, white, stage:iv	6.1
TCGA-EU-5904-01A	47 years, female, white, stage:i	6
TCGA-B8-A54F-01A	49 years, female, black or african american, stage:i	6
TCGA-B8-A54H-01A	69 years, female, black or african american, stage:ii	6
TCGA-B8-4143-01A	66 years, female, white, stage:iv	6
TCGA-B0-4706-01A	61 years, male, white, stage:iii	6
TCGA-B0-4701-01A	66 years, female, white, stage:iv	6
TCGA-BP-4993-01A	58 years, male, white, stage:i	6
TCGA-A3-A8OV-01A	75 years, male, black or african american, stage:i	6
TCGA-CZ-5458-01A	43 years, male, white, stage:iii	6
TCGA-B0-5075-01A	77 years, female, white, stage:iii	6
TCGA-B0-5120-01A	72 years, female, white, stage:i	5.9
TCGA-A3-3323-01A	53 years, male, white, stage:i	5.9
TCGA-B4-5836-01A	61 years, female, white, stage:i	5.9
TCGA-B8-A7U6-01A	54 years, female, black or african american, stage:i	5.9
TCGA-B0-5702-01A	71 years, male, white, stage:i	5.9
TCGA-B0-5705-01A	65 years, female, white, stage:i	5.9
TCGA-B8-5162-01A	63 years, male, white, stage:ii	5.9
TCGA-CJ-4907-01A	58 years, male, white, stage:iii	5.9
TCGA-BP-4763-01A	79 years, female, white, stage:i	5.9
TCGA-B8-A54D-01A	69 years, male, black or african american, stage:iii	5.9
TCGA-B0-4816-01A	49 years, male, white, stage:ii	5.9
TCGA-CZ-5453-01A	67 years, male, white, stage:ii	5.8
TCGA-CZ-4860-01A	60 years, male, white, stage:iv	5.8
TCGA-CJ-4893-01A	76 years, female, white, stage:i	5.8
TCGA-B0-4828-01A	79 years, male, white, stage:iv	5.8
TCGA-CW-5587-01A	62 years, female, white, stage:iii	5.8
TCGA-B8-A8YJ-01A	60 years, female, black or african american, stage:i	5.8
TCGA-AK-3458-01A	48 years, male, white, stage:i	5.8
TCGA-B8-A54J-01A	60 years, male, black or african american, stage:ii	5.8
TCGA-BP-4341-01A	67 years, male, white, stage:iii	5.8
TCGA-CJ-5682-01A	60 years, male, white, stage:iv	5.8
TCGA-BP-4161-01A	74 years, male, white, stage:i	5.8
TCGA-CZ-5451-01A	74 years, male, white, stage:ii	5.8
TCGA-BP-4169-01A	76 years, female, white, stage:ii	5.8
TCGA-B0-4714-01A	81 years, male, white, stage:iv	5.8
TCGA-B0-5084-01A	33 years, male, white, stage:iv	5.8
TCGA-AK-3450-01A	85 years, female, white, stage:i	5.8
TCGA-CJ-6030-01A	66 years, male, white, stage:i	5.8
TCGA-6D-AA2E-01A	68 years, female, black or african american, stage:i	5.7
TCGA-B0-4810-01A	47 years, male, white, stage:iii	5.7
TCGA-B0-5077-01A	77 years, male, white, stage:i	5.7
TCGA-BP-4774-01A	57 years, female, white, stage:i	5.7
TCGA-A3-3358-01A	57 years, female, white, stage:i	5.7
TCGA-MM-A563-01A	41 years, male, black or african american	5.7
TCGA-B0-5098-01A	53 years, female, black or african american, stage:i	5.7
TCGA-B8-4154-01A	73 years, female, white, stage:i	5.7
TCGA-B0-4696-01A	58 years, male, white, stage:iii	5.7
TCGA-CJ-5678-01A	62 years, male, black or african american, stage:iv	5.7
TCGA-BP-4983-01A	67 years, female, asian, stage:iii	5.7
TCGA-CW-5590-01A	51 years, male, white, stage:iv	5.7
TCGA-B0-5690-01A	53 years, female, white, stage:i	5.7
TCGA-BP-4162-01A	65 years, female, white, stage:i	5.6
TCGA-B2-5639-01A	46 years, male, white, stage:iv	5.6
TCGA-CJ-5684-01A	61 years, male, white, stage:iii	5.6
TCGA-CZ-5457-01A	62 years, male, white, stage:iii	5.6
TCGA-B0-5399-01A	46 years, male, white, stage:i	5.6
TCGA-CJ-4870-01A	58 years, female, black or african american, stage:iii	5.6
TCGA-CJ-4876-01A	57 years, male, white, stage:ii	5.6
TCGA-BP-4170-01A	72 years, female, white, stage:i	5.6
TCGA-B0-5106-01A	64 years, male, white, stage:i	5.6
TCGA-MW-A4EC-01A	73 years, female, black or african american, stage:i	5.6
TCGA-B0-4845-01A	70 years, male, white, stage:iv	5.6
TCGA-A3-A6NL-01A	49 years, female, black or african american, stage:i	5.5
TCGA-CJ-4868-01A	42 years, male, white, stage:iv	5.5
TCGA-BP-4781-01A	78 years, male, white, stage:i	5.5
TCGA-BP-4353-01A	61 years, male, white, stage:i	5.5
TCGA-BP-4777-01A	46 years, male, white, stage:i	5.5
TCGA-A3-3372-01A	64 years, male, white, stage:iii	5.5
TCGA-CJ-4644-01A	48 years, female, white, stage:iv	5.5
TCGA-CZ-4861-01A	63 years, male, white, stage:ii	5.5
TCGA-CJ-4900-01A	69 years, female, white, stage:iv	5.5
TCGA-B0-4699-01A	74 years, male, white, stage:iv	5.5
TCGA-BP-4160-01A	67 years, male, white, stage:iii	5.5
TCGA-CW-6097-01A	32 years, male, white, stage:iii	5.5
TCGA-BP-4967-01A	76 years, male, white, stage:iii	5.5
TCGA-CJ-4902-01A	61 years, male, white, stage:iii	5.5
TCGA-CW-5584-01A	74 years, male, white, stage:iii	5.5
TCGA-B8-A54G-01A	50 years, male, black or african american, stage:i	5.4
TCGA-B8-5553-01A	67 years, female, white, stage:i	5.4
TCGA-CJ-4884-01A	72 years, female, white, stage:iii	5.4
TCGA-BP-4989-01A	58 years, male, white, stage:iii	5.4
TCGA-BP-4335-01A	65 years, female, white, stage:iv	5.4
TCGA-CJ-4918-01A	64 years, male, white, stage:iv	5.4
TCGA-A3-3374-01A	51 years, female, black or african american, stage:i	5.4
TCGA-BP-4801-01A	57 years, male, white, stage:i	5.4
TCGA-BP-4176-01A	64 years, male, white, stage:i	5.4
TCGA-A3-A6NJ-01A	57 years, female, black or african american, stage:i	5.4
TCGA-CZ-4865-01A	70 years, female, white, stage:i	5.4
TCGA-BP-5187-01A	54 years, male, white, stage:i	5.4
TCGA-CJ-4920-01A	64 years, female, white, stage:i	5.4
TCGA-DV-5566-01A	67 years, female, white, stage:i	5.4
TCGA-A3-3378-01A	60 years, male, white, stage:i	5.3
TCGA-BP-4959-01A	49 years, male, white, stage:i	5.3
TCGA-BP-4782-01A	55 years, female, white, stage:i	5.3
TCGA-B0-5107-01A	65 years, female, white, stage:iv	5.3
TCGA-CJ-4890-01A	72 years, male, white, stage:iv	5.3
TCGA-BP-4163-01A	60 years, female, white, stage:iii	5.3
TCGA-3Z-A93Z-01A	69 years, male, black or african american, stage:i	5.3
TCGA-CJ-5675-01A	70 years, male, white, stage:ii	5.3
TCGA-DV-5569-01A	29 years, female, white, stage:i	5.3
TCGA-A3-A6NI-01A	47 years, male, black or african american, stage:i	5.3
TCGA-BP-4798-01A	74 years, male, white	5.3
TCGA-BP-4345-01A	62 years, male, white, stage:iii	5.3
TCGA-BP-4327-01A	75 years, female, white, stage:ii	5.3
TCGA-BP-4349-01A	68 years, female, white, stage:i	5.3
TCGA-A3-3387-01A	49 years, male, white, stage:i	5.3
TCGA-BP-4971-01A	40 years, male, white, stage:iii	5.2
TCGA-CZ-4856-01A	62 years, female, white, stage:i	5.2
TCGA-MM-A564-01A	68 years, male, black or african american, stage:ii	5.2
TCGA-DV-5574-01A	37 years, male, white, stage:i	5.2
TCGA-CJ-4916-01A	69 years, female, white, stage:iii	5.2
TCGA-B0-4718-01A	57 years, male, white, stage:iii	5.2
TCGA-DV-5565-01A	59 years, male, white, stage:i	5.2
TCGA-AK-3465-01A	71 years, female, black or african american, stage:i	5.2
TCGA-B0-5096-01A	72 years, female, white, stage:iii	5.2
TCGA-A3-3324-01A	51 years, male, white, stage:i	5.1
TCGA-CW-5581-01A	44 years, male, white, stage:i	5.1
TCGA-B8-5549-01A	53 years, male, white, stage:i	5.1
TCGA-CJ-4903-01A	50 years, male, white, stage:i	5.1
TCGA-BP-4159-01A	70 years, male, white, stage:i	5.1
TCGA-CJ-4641-01A	55 years, female, white, stage:iv	5.1
TCGA-G6-A8L6-01A	55 years, male, black or african american, stage:iv	5.1
TCGA-BP-5009-01A	52 years, male, white, stage:i	5.1
TCGA-BP-4804-01A	59 years, male, white, stage:i	5
TCGA-CJ-4871-01A	63 years, male, white, stage:iv	5
TCGA-BP-5195-01A	75 years, male, white, stage:i	5
TCGA-BP-5189-01A	60 years, male, white, stage:i	5
TCGA-B0-5094-01A	62 years, male, white, stage:iv	5
TCGA-BP-4803-01A	79 years, male, white, stage:iii	5
TCGA-CZ-5462-01A	83 years, male, white, stage:iv	5
TCGA-BP-4343-01A	64 years, male, white, stage:iii	5
TCGA-B0-5712-01A	68 years, female, black or african american, stage:iv	5
TCGA-B0-4945-01A	75 years, female, white, stage:i	5
TCGA-BP-4174-01A	49 years, male, white, stage:ii	5
TCGA-B0-5696-01A	70 years, male, white, stage:iii	5
TCGA-B0-5706-01A	45 years, male, white, stage:ii	5
TCGA-BP-4166-01A	69 years, male, white, stage:iii	4.9
TCGA-BP-4977-01A	57 years, male, white, stage:i	4.9
TCGA-CJ-5686-01A	59 years, female, white, stage:i	4.9
TCGA-B0-4848-01A	54 years, male, white, stage:iii	4.9
TCGA-CZ-5452-01A	69 years, male, white, stage:ii	4.9
TCGA-CJ-5683-01A	78 years, male, white, stage:i	4.9
TCGA-B0-4703-01A	51 years, male, white, stage:iv	4.9
TCGA-CJ-5689-01A	90 years, male, white, stage:i	4.9
TCGA-B0-4833-01A	82 years, female, white, stage:i	4.9
TCGA-BP-4347-01A	74 years, male, white, stage:iii	4.9
TCGA-B0-4690-01A	65 years, male, white, stage:iv	4.8
TCGA-B0-5116-01A	53 years, male, white, stage:iii	4.8
TCGA-B0-4813-01A	68 years, male, white, stage:iii	4.8
TCGA-B0-4691-01A	55 years, male, white, stage:iv	4.8
TCGA-B0-5692-01A	66 years, female, white, stage:iii	4.8
TCGA-CJ-4637-01A	52 years, female, white, stage:iv	4.7
TCGA-CJ-6031-01A	54 years, male, white, stage:i	4.7
TCGA-B0-5701-01A	65 years, male, white, stage:iii	4.7
TCGA-BP-4776-01A	52 years, male, white, stage:i	4.7
TCGA-BP-4326-01A	53 years, female, white, stage:i	4.7
TCGA-B0-5088-01A	53 years, male, white, stage:i	4.7
TCGA-BP-4771-01A	62 years, male, white, stage:iv	4.6
TCGA-CJ-4872-01A	51 years, male, white, stage:i	4.6
TCGA-CJ-6028-01A	58 years, male, white, stage:iv	4.6
TCGA-A3-3347-01A	76 years, female, white, stage:iii	4.6
TCGA-AK-3425-01A	68 years, male, white, stage:i	4.6
TCGA-B0-4837-01A	63 years, male, white, stage:i	4.6
TCGA-B0-4713-01A	76 years, female, white, stage:iii	4.5
TCGA-CJ-6033-01A	54 years, female, white, stage:iv	4.5
TCGA-CZ-4854-01A	68 years, male, white, stage:i	4.5
TCGA-CZ-5464-01A	69 years, male, white, stage:iv	4.5
TCGA-AS-3777-01A	63 years, male, white, stage:i	4.5
TCGA-CZ-5987-01A	60 years, male, white, stage:iv	4.5
TCGA-B0-5697-01A	50 years, male, white, stage:i	4.5
TCGA-B0-5097-01A	59 years, female, white, stage:iii	4.5
TCGA-CJ-4882-01A	57 years, male, black or african american, stage:iii	4.5
TCGA-BP-5173-01A	75 years, male, white, stage:i	4.5
TCGA-AK-3445-01A	69 years, male, white, stage:iii	4.5
TCGA-CZ-4866-01A	79 years, female, white, stage:i	4.5
TCGA-CJ-4636-01A	51 years, male, white, stage:iii	4.5
TCGA-CZ-5470-01A	72 years, female, stage:ii	4.5
TCGA-B0-5694-01A	71 years, male, white, stage:iii	4.5
TCGA-BP-5183-01A	57 years, male, white, stage:iii	4.5
TCGA-BP-4173-01A	47 years, male, white, stage:ii	4.5
TCGA-CZ-5460-01A	55 years, male, white, stage:iv	4.5
TCGA-B0-4694-01A	72 years, male, white, stage:iii	4.5
TCGA-AK-3440-01A	58 years, male, white, stage:i	4.4
TCGA-CZ-4858-01A	39 years, male, white, stage:ii	4.4
TCGA-BP-4797-01A	34 years, male, white, stage:iii	4.4
TCGA-BP-5200-01A	44 years, male, white, stage:ii	4.4
TCGA-CJ-4888-01A	59 years, male, white, stage:iv	4.4
TCGA-A3-3313-01A	59 years, male, black or african american, stage:i	4.4
TCGA-CZ-5984-01A	51 years, male, white, stage:i	4.4
TCGA-A3-3308-01A	77 years, female, white, stage:iii	4.4
TCGA-CZ-4863-01A	51 years, female, white, stage:iii	4.4
TCGA-B0-5081-01A	80 years, female, white, stage:iii	4.3
TCGA-B0-4815-01A	65 years, male, white, stage:iii	4.3
TCGA-BP-5177-01A	46 years, female, white, stage:i	4.3
TCGA-BP-4165-01A	64 years, female, white, stage:i	4.3
TCGA-B8-5158-01A	56 years, male, white, stage:iii	4.3
TCGA-CZ-5988-01A	38 years, male, white, stage:i	4.3
TCGA-BP-4992-01A	66 years, male, white, stage:i	4.3
TCGA-BP-5001-01A	43 years, female, white, stage:i	4.3
TCGA-AK-3447-01A	84 years, male, white, stage:ii	4.3
TCGA-CJ-4875-01A	67 years, male, white, stage:iv	4.3
TCGA-AK-3429-01A	54 years, female, white, stage:ii	4.3
TCGA-BP-5196-01A	54 years, male, white, stage:i	4.3
TCGA-B8-4153-01B	74 years, male, white, stage:iii	4.2
TCGA-B0-4836-01A	61 years, male, white, stage:iv	4.2
TCGA-BP-4962-01A	58 years, male, white, stage:ii	4.2
TCGA-B0-4819-01A	60 years, female, white, stage:iv	4.2
TCGA-B0-5707-01A	39 years, female, white, stage:i	4.2
TCGA-A3-3335-01A	41 years, male, white, stage:ii	4.2
TCGA-BP-4969-01A	63 years, female, white, stage:i	4.2
TCGA-B0-4698-01A	75 years, male, white, stage:iv	4.2
TCGA-CJ-4887-01A	48 years, male, white, stage:iv	4.1
TCGA-BP-4352-01A	74 years, female, white, stage:iv	4.1
TCGA-EU-5905-01A	67 years, female, white, stage:i	4.1
TCGA-A3-3357-01A	62 years, male, white, stage:ii	4.1
TCGA-CJ-4901-01A	47 years, male, white, stage:iii	4.1
TCGA-B8-A54E-01A	62 years, female, black or african american, stage:i	4.1
TCGA-CJ-5672-01A	84 years, male, white, stage:i	4.1
TCGA-B8-5163-01A	63 years, female, white, stage:iii	4
TCGA-BP-5176-01A	78 years, female, white, stage:i	4
TCGA-B0-5092-01A	53 years, female, white, stage:iv	4
TCGA-BP-4799-01A	70 years, male, white, stage:iii	4
TCGA-CZ-5469-01A	41 years, male, white, stage:ii	4
TCGA-CZ-5466-01A	67 years, male, stage:iii	4
TCGA-DV-5568-01A	26 years, male, white, stage:i	3.9
TCGA-CJ-4869-01A	49 years, male, white, stage:iii	3.9
TCGA-B0-5109-01A	69 years, male, white, stage:iii	3.9
TCGA-B0-5117-01A	40 years, male, white, stage:i	3.9
TCGA-CW-5588-01A	78 years, female, white, stage:i	3.9
TCGA-BP-5201-01A	63 years, male, white, stage:iv	3.9
TCGA-CJ-5671-01A	51 years, male, white, stage:i	3.9
TCGA-B0-4712-01A	76 years, male, white, stage:iv	3.9
TCGA-BP-4758-01A	40 years, male, white, stage:i	3.9
TCGA-BP-5181-01A	58 years, female, white, stage:i	3.9
TCGA-B0-5085-01A	76 years, female, white, stage:iii	3.9
TCGA-BP-4981-01A	75 years, female, white, stage:iii	3.8
TCGA-B0-4697-01A	46 years, female, white, stage:iv	3.8
TCGA-BP-5182-01A	56 years, male, white, stage:i	3.8
TCGA-CZ-5985-01A	58 years, male, white, stage:ii	3.8
TCGA-B0-4843-01A	57 years, male, white, stage:iii	3.8
TCGA-BP-5170-01A	55 years, male, white, stage:i	3.8
TCGA-B8-5551-01A	65 years, female, black or african american, stage:i	3.8
TCGA-BP-4337-01A	76 years, female, white, stage:iii	3.7
TCGA-B0-4707-01A	63 years, male, white, stage:iii	3.7
TCGA-CZ-5459-01A	63 years, male, white, stage:iii	3.7
TCGA-B0-5700-01A	77 years, male, white, stage:i	3.7
TCGA-BP-4759-01A	50 years, male, white, stage:i	3.7
TCGA-CZ-4857-01A	56 years, male, white, stage:iv	3.7
TCGA-CJ-6027-01A	77 years, male, white, stage:i	3.7
TCGA-B0-4811-01A	48 years, male, white, stage:iii	3.7
TCGA-BP-5010-01A	63 years, male, white, stage:iii	3.7
TCGA-B8-4620-01A	70 years, female, white, stage:iii	3.6
TCGA-BP-4787-01A	59 years, female, white, stage:iv	3.6
TCGA-BP-5198-01A	72 years, male, white, stage:iii	3.6
TCGA-B8-5550-01A	71 years, male, white, stage:iii	3.6
TCGA-B0-4700-01A	60 years, male, white, stage:iv	3.5
TCGA-BP-5180-01A	53 years, male, white, stage:i	3.5
TCGA-CJ-4912-01A	61 years, male, white, stage:ii	3.5
TCGA-B0-4839-01A	80 years, female, white, stage:i	3.4
TCGA-CJ-4638-01A	46 years, female, white, stage:iv	3.4
TCGA-CJ-4881-01A	41 years, male, white, stage:iii	3.4
TCGA-AK-3426-01A	37 years, male, white, stage:iii	3.4
TCGA-MM-A84U-01A	58 years, female, black or african american, stage:i	3.4
TCGA-BP-4985-01A	72 years, male, white, stage:iii	3.4
TCGA-B0-5121-01A	56 years, male, white, stage:i	3.4
TCGA-BP-5174-01A	45 years, female, white, stage:i	3.4
TCGA-BP-5000-01A	40 years, male, white, stage:i	3.3
TCGA-AK-3451-01A	48 years, male, white, stage:ii	3.3
TCGA-CJ-6032-01A	63 years, female, white, stage:ii	3.3
TCGA-B2-5641-01A	79 years, male, white, stage:i	3.3
TCGA-BP-4756-01A	63 years, female, asian, stage:i	3.3
TCGA-BP-4167-01A	60 years, male, white, stage:iii	3.3
TCGA-B0-4827-01A	77 years, female, white, stage:iii	3.3
TCGA-B0-4847-01A	60 years, male, white, stage:iv	3.3
TCGA-B0-4817-01A	81 years, male, white, stage:iii	3.2
TCGA-B4-5835-01A	64 years, female, white, stage:i	3.2
TCGA-AK-3453-01A	58 years, female, white, stage:ii	3.2
TCGA-BP-4960-01A	46 years, male, white, stage:ii	3.1
TCGA-B0-4842-01A	74 years, female, white, stage:iii	3.1
TCGA-B0-5400-01A	59 years, female, white, stage:iii	3
TCGA-AK-3436-01A	40 years, male, white, stage:iv	3
TCGA-BP-5190-01A	61 years, male, white, stage:i	3
TCGA-CJ-4891-01A	57 years, female, white, stage:iii	3
TCGA-CZ-5456-01A	57 years, male, white, stage:ii	3
TCGA-B0-4688-01A	46 years, male, white, stage:iv	3
TCGA-G6-A5PC-01A	54 years, female, black or african american, stage:iv	3
TCGA-CJ-5676-01A	47 years, male, white, stage:iii	2.9
TCGA-B2-4098-01A	72 years, female, black or african american, stage:i	2.8
TCGA-CJ-5677-01A	54 years, female, white, stage:iv	2.8
TCGA-CZ-5468-01A	84 years, male, white, stage:iv	2.8
TCGA-B0-4821-01A	68 years, female, asian, stage:iii	2.7
TCGA-B8-4621-01A	63 years, male, black or african american, stage:i	2.7
TCGA-AK-3454-01A	84 years, male, white, stage:i	2.6
TCGA-A3-3346-01A	68 years, male, white, stage:i	2.6
TCGA-B8-A54I-01A	48 years, male, black or african american, stage:i	2.6
TCGA-DV-A4VX-01A	59 years, male, black or african american, stage:iv	2.6
TCGA-CJ-4873-01A	85 years, female, white, stage:iii	2.6
TCGA-B0-4822-01A	78 years, male, white, stage:ii	2.5
TCGA-B0-4841-01A	63 years, male, white, stage:iv	2.4
TCGA-G6-A8L7-01A	81 years, female, black or african american, stage:i	2.4
TCGA-A3-3319-01A	70 years, male, white, stage:i	2.4
TCGA-BP-4338-01A	43 years, male, white, stage:i	2.4
TCGA-CJ-5679-01A	73 years, male, white, stage:iii	2.3
TCGA-BP-5178-01A	71 years, male, white, stage:iv	2.2
TCGA-BP-5185-01A	56 years, male, white, stage:i	2.1
TCGA-BP-4761-01A	57 years, male, white, stage:iii	2
TCGA-B0-4844-01A	60 years, male, white, stage:iv	1.7
TCGA-BP-5169-01A	70 years, male, white, stage:i	1.6
TCGA-BP-5175-01A	60 years, male, white, stage:i	1.6
TCGA-BP-5191-01A	80 years, male, white, stage:iii	1.5
