# Supplementary material for: Sunitinib-suppressed miR-452-5p facilitates renal cancer cell invasion and metastasis through modulating SMAD4/SMAD7 signals
Source: Mol Cancer. 2018 Nov 12;17:157. doi: 10.1186/s12943-018-0906-x (PMC6231268; doi:10.1186/s12943-018-0906-x)
Supplement: Supplementary file 13 — Table S13. SMAD4 expression and paitients’ survival time from TCGA RCC dataset according to www.proteinatlas.org. (XLSX 31 kb) [file 12943_2018_906_MOESM13_ESM.xlsx]

## Sheet: Sheet1
Table S13. miR-452-5p expression and corresponding SMAD4 expression in RCC and normal renal samples from RCC TCGA dataset
ID	hsa-miR-452-5p	SMAD4
TCGA-IA-A83W-01A	59.1571	5.41853
TCGA-A3-3385-01A	23.1693	6.36292
TCGA-A3-3311-01A	66.9646	6.4972
TCGA-CZ-5985-01A	91.9387	3.78347
TCGA-DW-7842-01A	2.24476	8.45595
TCGA-BP-5173-01A	25.9314	4.50444
TCGA-DV-5575-01A	42.3607	7.19756
TCGA-CW-6087-01A	57.1912	6.15907
TCGA-BP-4161-01A	165.759	5.79597
TCGA-A3-A8OW-01A	145.591	6.80007
TCGA-UZ-A9Q0-01A	1.15427	3.31511
TCGA-EV-5901-01A	37.2128	7.53048
TCGA-BP-4337-01A	39.936	3.7493
TCGA-F9-A7Q0-01A	11.3182	2.87161
TCGA-B3-4103-01A	9.97695	10.7012
TCGA-GL-A9DC-01A	42.0915	5.71444
TCGA-A4-7996-01A	3.01757	5.03391
TCGA-BP-5201-01A	66.8631	3.90148
TCGA-CW-5587-01A	78.6479	5.82266
TCGA-UN-AAZ9-01A	11.7112	7.27191
TCGA-BP-5200-01A	37.2946	4.42317
TCGA-CZ-4862-01A	87.7382	7.81554
TCGA-BP-4962-01A	70.6968	4.22313
TCGA-CJ-4904-01A	73.6149	6.25
TCGA-B0-5102-01A	33.7828	6.17923
TCGA-B0-5705-01A	29.4695	5.88198
TCGA-CJ-4918-01A	66.6136	5.40345
TCGA-B0-4691-01A	21.7632	4.7884
TCGA-B8-4619-01A	24.295	6.39702
TCGA-Y8-A8S1-01A	45.2765	1.22191
TCGA-MM-A84U-01A	176.974	3.39513
TCGA-UZ-A9PJ-01A	1.82119	7.03348
TCGA-BP-5004-01A	55.0752	7.39067
TCGA-B0-5119-01A	70.3699	7.39644
TCGA-B1-A47N-01A	16.7059	5.41908
TCGA-SX-A7SS-01A	15.7029	5.17964
TCGA-B0-5106-01A	81.4949	5.56217
TCGA-CW-5584-01A	135.22	5.45096
TCGA-IA-A83S-01A	14.7258	3.43749
TCGA-IZ-8195-01A	10.8001	3.77049
TCGA-A3-A6NI-01A	107.024	5.28823
TCGA-2Z-A9JP-01A	8.01852	1.49682
TCGA-P4-AAVL-01A	36.7809	5.70317
TCGA-B0-4816-01A	83.6548	5.85376
TCGA-B0-4700-01A	44.9087	3.48783
TCGA-CJ-5680-01A	35.0397	6.37418
TCGA-DZ-6135-01A	13.429	7.31733
TCGA-MH-A855-01A	17.8429	4.89567
TCGA-BP-4974-01A	124.355	7.3306
TCGA-G7-7501-01A	10.1097	7.67259
TCGA-B0-5098-01A	109.332	5.71708
TCGA-2Z-A9J5-01A	15.1751	3.24214
TCGA-BP-4766-01A	41.9508	6.08486
TCGA-Y8-A894-01A	1.55158	7.87138
TCGA-B2-5633-01A	60.495	9.45231
TCGA-2Z-A9J7-01A	2.91741	4.88796
TCGA-B0-4822-01A	21.4784	2.52191
TCGA-AK-3460-01A	49.3391	6.6215
TCGA-HE-A5NJ-01A	7.6383	6.08155
TCGA-BP-4799-01A	189.165	3.98428
TCGA-A3-3320-01A	63.4547	8.45551
TCGA-B3-4104-01A	14.3244	6.54142
TCGA-A4-A5DU-01A	4.75605	5.65554
TCGA-B0-5402-01A	170.674	6.35416
TCGA-A3-3357-01A	13.1799	4.11593
TCGA-AK-3428-01A	65.0424	8.37171
TCGA-B0-4833-01A	32.7111	4.87357
TCGA-A3-3317-01A	77.4035	7.549
TCGA-V9-A7HT-01A	14.1477	4.13457
TCGA-BP-4992-01A	27.2445	4.29374
TCGA-B8-A54E-01A	24.1957	4.08739
TCGA-B0-5092-01A	37.9159	4.00854
TCGA-5P-A9K4-01A	92.2678	4.67518
TCGA-5P-A9JV-01A	116.713	6.3833
TCGA-EU-5906-01A	42.72	6.97014
TCGA-BP-4968-01A	29.3415	6.30772
TCGA-DV-5565-01A	142.878	5.20169
TCGA-B0-4703-01A	58.2723	4.88977
TCGA-BP-4976-01A	41.2923	6.87912
TCGA-B1-5398-01A	20.2822	3.41852
TCGA-B8-5546-01A	12.1086	7.86739
TCGA-B8-5550-01A	47.1314	3.61814
TCGA-B8-4620-01A	102.76	3.64065
TCGA-BQ-5881-01A	28.9447	1.81226
TCGA-B4-5832-01A	210.691	8.06921
TCGA-MH-A857-01A	10.8479	5.10526
TCGA-CJ-4636-01A	20.4023	4.49094
TCGA-B0-4813-01A	27.9467	4.81289
TCGA-B2-5635-01A	79.505	4.75586
TCGA-BP-4781-01A	42.0472	5.52282
TCGA-B9-A5W7-01A	3.80157	6.664
TCGA-UZ-A9PL-01A	17.6871	5.07929
TCGA-AK-3436-01A	53.5883	3.03668
TCGA-A3-3374-01A	6.296	5.40218
TCGA-SX-A7SQ-01A	27.1682	4.9101
TCGA-DW-7834-01A	24.8117	5.60827
TCGA-B0-5691-01A	39.4298	7.46492
TCGA-BP-4765-01A	41.9267	7.45271
TCGA-B8-4143-01A	25.5024	6.02808
TCGA-PJ-A5Z8-01A	30.2535	7.21556
TCGA-BP-4771-01A	83.0449	4.64461
TCGA-AL-3467-01A	2.24369	11.7639
TCGA-BP-4174-01A	37.3829	4.99232
TCGA-B0-5690-01A	93.8492	5.6683
TCGA-CW-5591-01A	194.302	7.90984
TCGA-BP-4176-01A	49.7696	5.39975
TCGA-B0-5080-01A	64.8818	6.09337
TCGA-SX-A71V-01A	5.00706	3.54669
TCGA-P4-A5E7-01A	21.0933	5.02095
TCGA-5P-A9K0-01A	4.85856	4.98493
TCGA-A3-3387-01A	68.4165	5.26103
TCGA-B0-4698-01A	54.4508	4.1674
TCGA-CJ-4637-01A	42.5864	4.74222
TCGA-CJ-5682-01A	185.193	5.79682
TCGA-BP-4998-01A	83.8356	7.30164
TCGA-CZ-5988-01A	120.051	4.29749
TCGA-DW-5561-01A	16.2715	5.38174
TCGA-BP-5191-01A	101.408	1.51529
TCGA-A3-3308-01A	78.9125	4.36093
TCGA-GL-A4EM-01A	29.2945	2.00705
TCGA-BQ-7061-01A	43.5753	5.62835
TCGA-AK-3458-01A	57.8786	5.80164
TCGA-BP-4173-01A	31.9935	4.47793
TCGA-A3-3370-01A	30.8415	6.89428
TCGA-CJ-5671-01A	104.158	3.88986
TCGA-B0-4824-01A	18.3704	6.35935
TCGA-B9-4117-01A	17.9668	5.68152
TCGA-BQ-7046-01A	9.32561	3.97419
TCGA-BP-4326-01A	27.9614	4.66746
TCGA-BP-4329-01A	56.1712	6.46198
TCGA-B0-4712-01A	61.2374	3.88977
TCGA-BQ-7062-01A	11.5541	4.95586
TCGA-SX-A7SU-01A	15.8598	6.96847
TCGA-UZ-A9PU-01A	1.61529	6.56745
TCGA-CJ-4897-01A	59.8419	7.42078
TCGA-UZ-A9PR-01A	3.40216	7.90099
TCGA-BP-4763-01A	101.976	5.86323
TCGA-4A-A93Y-01A	70.5253	4.2734
TCGA-B9-A44B-01A	153.554	3.61734
TCGA-UZ-A9PP-01A	30.1678	5.22159
TCGA-A4-7915-01A	170.575	4.2829
TCGA-B0-5694-01A	158.938	4.4795
TCGA-BP-4345-01A	81.8131	5.28228
TCGA-BP-5174-01A	145.044	3.37228
TCGA-BP-4987-01A	52.0557	8.44823
TCGA-BP-5176-01A	89.0351	4.03344
TCGA-B0-5696-01A	70.9323	4.98827
TCGA-G7-6790-01A	17.8423	6.63707
TCGA-B0-4696-01A	10.0819	5.69518
TCGA-B0-4699-01A	48.6465	5.4724
TCGA-DV-A4W0-05A	30.2901	9.08208
TCGA-B0-5697-01A	115.061	4.51731
TCGA-AL-3472-01A	5.41454	6.20556
TCGA-AK-3431-01A	54.1487	8.23291
TCGA-B0-5084-01A	6.56473	5.77939
TCGA-BP-5010-01A	31.6324	3.6537
TCGA-MH-A55W-01A	5.09113	5.36315
TCGA-DZ-6133-01A	5.45993	6.01733
TCGA-BP-5168-01A	5.27008	6.1913
TCGA-A4-8311-01A	20.7099	5.27948
TCGA-CW-6088-01A	79.779	8.4881
TCGA-B8-4622-01A	206.646	7.27232
TCGA-A4-8516-01A	2.62915	5.70609
TCGA-B1-A47M-01A	9.12733	4.56712
TCGA-B0-5702-01A	81.5537	5.90673
TCGA-B4-5378-01A	27.3234	7.85919
TCGA-B8-5164-01A	21.3727	6.33411
TCGA-CZ-4860-01A	32.1433	5.83648
TCGA-CJ-6030-01A	53.5504	5.75691
TCGA-AK-3433-01A	9.1132	10.8866
TCGA-CZ-5469-01A	41.6922	3.98208
TCGA-CZ-5463-01A	192.105	6.39319
TCGA-AK-3434-01A	87.0008	6.31521
TCGA-AL-3466-01A	40.2532	4.37329
TCGA-B0-5120-01A	100.136	5.94986
TCGA-BP-5194-01A	44.6715	6.76416
TCGA-GL-A9DD-01A	18.5415	4.09609
TCGA-CJ-4873-01A	60.1714	2.56397
TCGA-CJ-4635-01A	18.227	7.68038
TCGA-2Z-A9JL-01A	13.5671	7.32454
TCGA-B0-5812-01A	69.9	8.03113
TCGA-F9-A8NY-01A	102.909	5.51748
TCGA-BP-5202-01A	83.562	6.11766
TCGA-B0-5077-01A	25.389	5.73345
TCGA-A4-7734-01A	21.7162	7.89824
TCGA-BP-5170-01A	85.8377	3.76768
TCGA-CJ-4876-01A	22.0641	5.58465
TCGA-CW-5590-01A	38.1224	5.67059
TCGA-B0-4846-01A	122.023	7.44185
TCGA-A3-A8CQ-01A	68.4008	7.17587
TCGA-B9-A8YH-01A	8.93267	6.24474
TCGA-B8-A54F-01A	30.2198	6.03735
TCGA-Y8-A896-01A	10.6933	5.20878
TCGA-CJ-5672-01A	116.432	4.078
TCGA-SX-A71W-01A	7.25821	6.00457
TCGA-B0-4811-01A	31.5301	3.67183
TCGA-HE-A5NF-01A	13.4335	3.02618
TCGA-BQ-5894-01A	96.6846	4.24088
TCGA-B0-4852-01A	62.1707	7.75385
TCGA-B2-4099-01A	116.302	7.05487
TCGA-EV-5902-01A	2.27475	6.52972
TCGA-B0-4836-01A	113.409	4.24181
TCGA-2Z-A9JE-01A	1.7474	5.08534
TCGA-Y8-A895-01A	13.8955	5.44193
TCGA-BQ-7048-01A	28.6313	5.07462
TCGA-BQ-5882-01A	91.2176	3.57604
TCGA-A3-3324-01A	39.5926	5.14545
TCGA-CZ-5467-01A	74.0444	9.8775
TCGA-B1-A47O-01A	36.2112	2.61224
TCGA-CJ-4907-01A	88.9158	5.86958
TCGA-AK-3447-01A	20.9327	4.28314
TCGA-BP-5187-01A	39.4784	5.38477
TCGA-P4-A5E6-01A	15.8748	3.6824
TCGA-B0-5712-01A	29.8035	5.00038
TCGA-CJ-6028-01A	124.347	4.6392
TCGA-AL-A5DJ-01A	15.0732	4.22335
TCGA-J7-A8I2-01A	66.7924	1.97203
TCGA-A4-A7UZ-01A	9.71783	5.67036
TCGA-2Z-A9J9-01A	37.1148	9.08519
TCGA-4A-A93W-01A	15.1585	6.61699
TCGA-AK-3461-01A	37.9826	7.96426
TCGA-DW-7839-01A	3.00021	9.31824
TCGA-CZ-4864-01A	28.3172	7.08811
TCGA-P4-AAVM-01A	11.759	3.18328
TCGA-BP-4965-01A	85.3902	8.44107
TCGA-CJ-4905-01A	81.3173	8.83373
TCGA-CJ-5683-01A	101.089	4.89621
TCGA-2Z-A9J2-01A	63.9992	2.72957
TCGA-2Z-A9JS-01A	4.10109	5.99393
TCGA-B2-3924-01A	35.0146	9.58778
TCGA-BP-4776-01A	108.884	4.673
TCGA-A4-7287-01A	425.439	3.345
TCGA-SX-A7SR-01A	3.08273	6.49344
TCGA-BP-5186-01A	34.8947	7.61454
TCGA-A3-A6NJ-01A	37.6067	5.39885
TCGA-CJ-4643-01A	47.5007	7.29104
TCGA-G7-6789-01A	103.657	3.16424
TCGA-A3-3313-01A	37.8287	4.4003
TCGA-B0-5100-01A	32.6409	6.08387
TCGA-AK-3440-01A	20.5626	4.44031
TCGA-CJ-4881-01A	230.621	3.43129
TCGA-B0-5107-01A	1.83116	5.31785
TCGA-B3-8121-01A	8.85758	5.86458
TCGA-DW-5560-01A	13.9006	8.02328
TCGA-CJ-4872-01A	92.6753	4.64109
TCGA-BQ-5877-01A	122.682	4.74601
TCGA-CJ-4912-01A	115.203	3.45429
TCGA-Y8-A8RZ-01A	21.0437	4.21672
TCGA-BP-4981-01A	250.27	3.82615
TCGA-BP-4975-01A	68.697	7.30887
TCGA-B2-5636-01A	30.7982	8.58647
TCGA-B8-A54H-01A	41.46	6.03575
TCGA-BQ-5875-01A	29.4292	4.60432
TCGA-G7-6796-01A	40.2169	3.37138
TCGA-CZ-4865-01A	176.503	5.38912
TCGA-BP-4353-01A	115.905	5.51794
TCGA-BP-4342-01A	58.738	7.83685
TCGA-BP-4777-01A	131.114	5.5141
TCGA-CJ-5675-01A	26.9607	5.29231
TCGA-AL-7173-01A	52.0532	4.25091
TCGA-A3-3372-01A	138.059	5.50961
TCGA-CZ-4853-01A	92.6666	6.08375
TCGA-BQ-7045-01A	20.7743	4.20499
TCGA-AK-3426-01A	27.7115	3.40137
TCGA-5P-A9KE-01A	3.80321	3.44186
TCGA-BP-4330-01A	45.5807	6.99792
TCGA-BP-4977-01A	145.066	4.93456
TCGA-DW-7838-01A	12.8663	4.50856
TCGA-WN-AB4C-01A	31.4305	2.42637
TCGA-BQ-5883-01A	20.4727	4.42764
TCGA-CJ-4641-01A	30.3326	5.08476
TCGA-GL-7966-01A	56.3133	2.52295
TCGA-CZ-4859-01A	30.2455	6.66626
TCGA-B0-5075-01A	11.2349	5.96363
TCGA-MM-A563-01A	59.8447	5.72026
TCGA-B2-4102-01A	127.377	6.20155
TCGA-B0-4688-01A	953.672	3.00311
TCGA-BP-5009-01A	46.4379	5.06726
TCGA-A4-A5Y1-01A	80.7061	3.7014
TCGA-B8-5552-01B	41.1897	6.80736
TCGA-BP-4985-01A	203.482	3.38427
TCGA-BP-5182-01A	83.1296	3.79574
TCGA-BQ-5880-01A	77.5879	2.70323
TCGA-B8-4151-01A	131.983	8.07867
TCGA-A3-A6NN-01A	51.8907	7.08767
TCGA-A4-A57E-01A	14.0293	2.29245
TCGA-B8-A54J-01A	51.3285	5.79885
TCGA-5P-A9K9-01A	68.2361	3.38818
TCGA-A3-3378-01A	114.309	5.34333
TCGA-B2-3923-01A	14.9841	8.07485
TCGA-G7-A8LC-01A	14.3141	5.47362
TCGA-AK-3451-01A	22.3209	3.31508
TCGA-A4-8098-01A	11.5083	5.18033
TCGA-BP-5195-01A	86.5968	5.04128
TCGA-BP-5190-01A	183.169	3.01948
TCGA-BP-5000-01A	57.5983	3.34628
TCGA-2Z-A9J8-01A	25.1512	5.17558
TCGA-BP-4325-01A	32.3077	7.47662
TCGA-B2-3924-01B	39.6737	17.8671
TCGA-BP-4790-01A	82.0355	8.98579
TCGA-G7-A8LD-01A	37.1842	4.58632
TCGA-BQ-5879-01A	184.613	3.56977
TCGA-BP-4327-01A	82.0019	5.27449
TCGA-DW-7840-01A	4.47246	2.67776
TCGA-BP-5185-01A	29.9822	2.06589
TCGA-BP-4993-01A	87.2656	6.01371
TCGA-B8-A8YJ-01A	60.4601	5.81548
TCGA-CZ-4856-01A	61.6777	5.23537
TCGA-B8-A7U6-01A	89.1832	5.91229
TCGA-CJ-4891-01A	9.49064	3.01036
TCGA-CJ-4638-01A	22.9642	3.43767
TCGA-CZ-5461-01A	41.4238	6.0554
TCGA-CZ-5455-01A	91.481	6.47683
TCGA-BP-5178-01A	92.9656	2.1673
TCGA-SX-A7SL-01A	4.30691	4.64142
TCGA-CJ-5677-01A	110.133	2.80143
TCGA-BP-4797-01A	27.4102	4.43057
TCGA-DW-7837-01A	5.62678	6.2893
TCGA-B0-5094-01A	103.947	5.03465
TCGA-CZ-5464-01A	118.583	4.52107
TCGA-B8-5159-01A	27.4107	6.50724
TCGA-BP-5192-01A	57.9112	6.6371
TCGA-CJ-4890-01A	71.5512	5.31123
TCGA-BQ-7049-01A	54.8166	5.9562
TCGA-CZ-5457-01A	18.0479	5.60725
TCGA-BP-4761-01A	44.9892	1.97169
TCGA-B0-4814-01A	33.9952	6.10822
TCGA-BP-5177-01A	50.648	4.31708
TCGA-BQ-5888-01A	75.3419	3.7607
TCGA-P4-A5EB-01A	34.5629	4.59763
TCGA-SX-A7SM-01A	149.47	2.25996
TCGA-B0-5096-01A	52.0203	5.18127
TCGA-G7-6793-01A	37.95	4.56387
TCGA-DW-7836-01A	12.0224	6.34522
TCGA-BP-4759-01A	42.7472	3.70411
TCGA-BP-5007-01A	198.305	7.16435
TCGA-CZ-5987-01A	116.896	4.51882
TCGA-BP-4762-01A	68.926	6.76108
TCGA-B0-5110-01A	84.2578	7.66022
TCGA-A4-8517-01A	2.93769	5.02615
TCGA-B2-3923-01B	23.6664	22.4092
TCGA-GL-6846-01A	20.9847	5.93578
TCGA-B0-4821-01A	259.173	2.70855
TCGA-F9-A97G-01A	44.5258	2.37911
TCGA-A3-3380-01A	133.466	8.53949
TCGA-A4-7584-01A	5.08492	6.36582
TCGA-B0-4848-01A	86.6396	4.91999
TCGA-EU-5904-01A	101.891	6.0452
TCGA-GL-A9DE-01A	30.4465	4.69325
TCGA-B0-5104-01A	171.315	7.07069
TCGA-MM-A564-01A	174.545	5.22743
TCGA-GL-7773-01A	9.49937	2.96855
TCGA-P4-A5E8-01A	78.8747	3.33004
TCGA-B9-A5W8-01A	7.9407	5.16496
TCGA-CJ-4869-01A	74.2652	3.92778
TCGA-BQ-7055-01A	8.426	6.25968
TCGA-B0-4834-01A	34.3285	7.96016
TCGA-CZ-4857-01A	151.02	3.67874
TCGA-2Z-A9JN-01A	22.6379	3.63586
TCGA-CJ-4875-01A	115.254	4.27893
TCGA-A3-3322-01A	39.7218	6.48055
TCGA-G7-6795-01A	12.2486	3.41741
TCGA-IZ-A6M8-01A	6.62592	3.17854
TCGA-B0-4697-01A	35.155	3.81651
TCGA-A3-3365-01A	61.3821	9.63049
TCGA-DV-5569-01A	134.464	5.29192
TCGA-A3-3351-01A	41.2023	7.4379
TCGA-A3-3347-01A	97.529	4.63187
TCGA-AK-3445-01A	26.3731	4.50176
TCGA-B2-5641-01A	36.1512	3.29261
TCGA-BQ-7051-01A	3.08948	6.41743
TCGA-BQ-5885-01A	173.155	3.95303
TCGA-G6-A5PC-01A	53.9591	2.98209
TCGA-B8-5163-01A	175.452	4.03534
TCGA-CJ-4642-01B	34.3687	6.78775
TCGA-B0-5695-01A	53.4797	6.40777
TCGA-IA-A40X-01A	7.89892	4.31599
TCGA-DV-5574-01A	44.2611	5.22124
TCGA-2Z-A9JD-01A	18.6679	5.3989
TCGA-B4-5835-01A	315.528	3.19859
TCGA-B0-4714-01A	36.1584	5.78059
TCGA-2Z-A9J1-01A	16.17	7.2432
TCGA-CZ-5453-01A	33.4078	5.83851
TCGA-CZ-4866-01A	29.899	4.49165
TCGA-B0-5709-01A	32.7465	6.7979
TCGA-CJ-4882-01A	58.4926	4.50742
TCGA-B4-5836-01A	40.3377	5.91847
TCGA-B9-4617-01A	6.59556	3.68279
TCGA-CZ-4863-01A	19.7586	4.35866
TCGA-CZ-5984-01A	89.0895	4.37331
TCGA-UZ-A9Q1-01A	4.99372	4.14567
TCGA-B0-4945-01A	69.1128	4.99604
TCGA-A4-7288-01A	6.64057	5.10736
TCGA-B0-5097-01A	109.092	4.50747
TCGA-B9-5155-01A	9.56727	10.1663
TCGA-5P-A9JZ-01A	4.6541	4.83315
TCGA-2Z-A9JG-01A	15.2695	4.80628
TCGA-BP-4346-01A	14.1901	6.42039
TCGA-UZ-A9PM-01A	7.72406	4.21854
TCGA-HE-A5NK-01A	23.3272	4.89118
TCGA-B3-3926-01A	4.15682	6.84161
TCGA-UZ-A9PZ-01A	11.4047	5.05096
TCGA-B9-7268-01A	1.54652	5.51443
TCGA-P4-A5EA-01A	54.8654	2.42086
TCGA-2Z-A9JT-01A	11.3848	3.13886
TCGA-2K-A9WE-01A	15.9524	3.64782
TCGA-CZ-5460-01A	27.0692	4.4685
TCGA-B8-A54K-01A	28.8237	7.39716
TCGA-IA-A83V-01A	38.0957	3.94033
TCGA-GL-8500-01A	4.24656	5.08911
TCGA-BQ-7044-01A	4.43847	2.64275
TCGA-BQ-5884-01A	16.7396	7.52283
TCGA-UZ-A9PS-05A	27.0267	4.08089
TCGA-BP-4355-01A	96.0479	6.06824
TCGA-2Z-A9JM-01A	23.7919	5.26278
TCGA-CJ-4916-01A	112.002	5.21235
TCGA-CZ-5451-01A	36.5126	5.78812
TCGA-B8-5545-01A	47.8014	7.38383
TCGA-CJ-4884-01A	18.8794	5.41341
TCGA-AK-3465-01A	32.0344	5.18971
TCGA-BP-4770-01A	39.1698	7.16107
TCGA-AK-3425-01A	141.154	4.61325
TCGA-CJ-4878-01A	43.7086	7.61522
TCGA-CZ-5470-01A	69.0244	4.48655
TCGA-CJ-4887-01A	32.6119	4.13201
TCGA-HE-A5NI-01A	20.8091	3.53339
TCGA-G7-6797-01A	2.93263	8.09586
TCGA-B2-5633-01B	50.4556	17.4811
TCGA-BP-4789-01A	116.427	10.9835
TCGA-CZ-5466-01A	154.907	3.96668
TCGA-B8-A54I-01A	57.2955	2.57612
TCGA-A4-8312-01A	8.77399	4.77969
TCGA-A3-3346-01A	159.363	2.58149
TCGA-B0-5121-01A	180.46	3.37403
TCGA-MW-A4EC-01A	43.7831	5.56058
TCGA-A4-8515-01A	2.27934	5.7999
TCGA-BP-4971-01A	30.5453	5.23815
TCGA-A3-A8OX-01A	69.5333	4.94117
TCGA-B8-A54G-01A	20.2631	5.44827
TCGA-5P-A9JU-01A	59.8887	3.86536
TCGA-B0-5700-01A	42.4777	3.7081
TCGA-DZ-6132-01A	25.8069	5.32819
TCGA-HE-A5NH-01A	1.27883	6.80164
TCGA-B8-5162-01A	39.1828	5.87587
TCGA-B0-4827-01A	138.038	3.2785
TCGA-CZ-5465-01A	123.279	7.08264
TCGA-UZ-A9PX-01A	5.58151	6.29935
TCGA-A3-3383-01A	174.771	6.37136
TCGA-A4-7585-01A	32.534	4.21148
TCGA-WN-A9G9-01A	170.666	3.52507
TCGA-CZ-4854-01A	320.407	4.5343
TCGA-BP-4961-01A	137.754	7.61313
TCGA-CJ-6033-01A	33.423	4.5373
TCGA-A3-3323-01A	99.9853	5.93883
TCGA-BP-5196-01A	32.0021	4.26351
TCGA-BP-4162-01A	35.8223	5.64949
TCGA-B8-5158-01A	96.2593	4.30103
TCGA-BP-4159-01A	116.136	5.08588
TCGA-T7-A92I-01A	21.2307	6.94387
TCGA-BP-4986-01A	81.0357	7.04828
TCGA-B8-5551-01A	98.5101	3.75337
TCGA-2Z-A9J6-01A	14.891	5.00808
TCGA-B4-5843-01A	91.617	7.1551
TCGA-BP-4332-01A	39.7115	9.45172
TCGA-2Z-A9JK-01A	97.689	4.50495
TCGA-B2-A4SR-01A	88.7932	8.96862
TCGA-4A-A93X-01A	14.1336	3.2331
TCGA-UZ-A9PK-01A	21.5891	5.41843
TCGA-B0-5399-01A	51.6964	5.60178
TCGA-B3-A6W5-01A	14.0296	4.38745
TCGA-BP-5181-01A	63.22	3.8643
TCGA-B4-5844-01A	75.8029	7.43166
TCGA-BP-5008-01A	44.8618	6.94527
TCGA-UZ-A9PN-01A	71.7288	5.97289
TCGA-B0-4810-01A	33.1209	5.73693
TCGA-CW-5589-01A	76.1337	6.14507
TCGA-2Z-A9JR-01A	4.49786	6.2531
TCGA-BQ-5891-01A	167.172	5.08241
TCGA-A4-7997-01A	33.6718	5.4935
TCGA-MH-A560-01A	19.3744	2.89326
TCGA-BP-4334-01A	8.29543	6.17837
TCGA-5P-A9K2-01A	3.86766	2.58629
TCGA-CJ-4901-01A	104.959	4.09573
TCGA-DV-A4VZ-01A	32.7016	6.49136
TCGA-B0-4818-01A	85.2621	6.12366
TCGA-5P-A9KA-01A	39.5421	6.45433
TCGA-J7-8537-01A	24.7041	3.19419
TCGA-A4-8518-01A	33.3836	2.56799
TCGA-B1-A655-01A	8.84675	3.84286
TCGA-AK-3453-01A	35.4398	3.1694
TCGA-B0-5707-01A	19.7082	4.19395
TCGA-BP-4354-01A	26.8473	6.76032
TCGA-A4-8630-01A	4.10817	5.0726
TCGA-B0-4838-01A	66.2364	6.67684
TCGA-B0-4828-01A	21.329	5.82448
TCGA-A4-A4ZT-01A	10.5974	5.35773
TCGA-G6-A8L8-01A	155.744	6.52838
TCGA-O9-A75Z-01A	6.34218	6.68236
TCGA-B0-4718-01A	41.3072	5.20756
TCGA-AL-3473-01A	75.8945	5.35433
TCGA-B3-3925-01A	11.193	9.12451
TCGA-CJ-4639-01A	57.522	7.90367
TCGA-IZ-8196-01A	9.40152	7.20873
TCGA-AK-3427-01A	20.9753	6.19071
TCGA-AK-3443-01A	8.98256	8.14909
TCGA-BP-5183-01A	187.434	4.47876
TCGA-SX-A71S-01A	7.43849	7.99341
TCGA-CJ-4920-01A	74.2427	5.37014
TCGA-A3-3319-01A	147.318	2.37699
TCGA-B0-4842-01A	28.8472	3.11279
TCGA-B0-4845-01A	36.3182	5.55016
TCGA-B0-4694-01A	50.1543	4.45696
TCGA-CZ-5452-01A	224.466	4.90277
TCGA-DW-7963-01B	6.74753	3.10006
TCGA-CJ-6032-01A	44.6643	3.30594
TCGA-CJ-5679-01A	237.893	2.33051
TCGA-BP-4163-01A	82.3122	5.29948
TCGA-CJ-5684-01A	134.126	5.61285
TCGA-B9-A69E-01A	45.702	4.79125
TCGA-BP-4967-01A	44.6078	5.45335
TCGA-BP-4768-01A	67.5019	6.22476
TCGA-2Z-A9JJ-01A	43.5703	2.60184
TCGA-CZ-5986-01A	35.8343	8.28445
TCGA-UZ-A9PQ-01A	27.4412	4.70434
TCGA-5P-A9KF-01A	6.66971	4.90226
TCGA-B1-7332-01A	6.50428	3.30549
TCGA-BP-4347-01A	34.8018	4.85854
TCGA-A3-3307-01A	49.042	8.50455
TCGA-IA-A83T-01A	10.8467	4.04284
TCGA-SX-A7SN-01A	2.93744	4.87993
TCGA-BP-4335-01A	127.265	5.40771
TCGA-BP-4995-01A	42.7391	7.1901
TCGA-BP-4795-01A	39.9571	6.80443
TCGA-BP-4982-01A	191.091	7.87351
TCGA-CJ-4886-01A	70.4369	7.35474
TCGA-BP-4769-01A	37.8675	7.87087
TCGA-B0-5113-01A	42.9287	8.15229
TCGA-2Z-A9JI-01A	85.0242	3.75735
TCGA-BP-4804-01A	167.389	5.04847
TCGA-CW-5585-01A	52.104	11.8303
TCGA-2Z-A9JQ-01A	13.4604	6.64254
TCGA-DV-5567-01A	18.9882	8.2173
TCGA-G7-7502-01A	18.5283	7.26089
TCGA-B0-5400-01A	53.0714	3.04525
TCGA-CZ-5462-01A	146.483	5.01888
TCGA-BP-4352-01A	17.2801	4.1315
TCGA-AT-A5NU-01A	3.64188	4.52282
TCGA-B2-5639-01A	223.075	5.62228
TCGA-G7-A4TM-01A	13.2291	6.11943
TCGA-BQ-7058-01A	21.6655	1.11762
TCGA-BP-4341-01A	106.351	5.79702
TCGA-B9-4113-01A	3.18146	8.59563
TCGA-BP-4758-01A	42.5609	3.88596
TCGA-BP-4167-01A	53.5474	3.28643
TCGA-SX-A7SP-01A	22.1281	3.88008
TCGA-B8-5165-01A	58.1775	7.07636
TCGA-B4-5834-01A	82.2232	7.95708
TCGA-A4-A6HP-01A	4.51225	4.14362
TCGA-BP-5199-01A	28.6187	6.45193
TCGA-CJ-4908-01A	80.8721	7.11729
TCGA-BP-4983-01A	304.86	5.67344
TCGA-EV-5903-01A	48.9546	3.51835
TCGA-B0-5115-01A	45.1087	6.10374
TCGA-DV-5568-01A	32.6888	3.94482
TCGA-B0-5699-01A	34.5826	7.2169
TCGA-HE-A5NL-01A	8.64272	4.7457
TCGA-B0-5711-01A	137.239	6.49243
TCGA-SX-A71U-01A	6.95333	5.01209
TCGA-B0-5693-01A	106.814	8.35109
TCGA-DW-7841-01A	6.69926	5.28144
TCGA-5P-A9K6-01A	15.6175	4.36
TCGA-B0-5713-01A	46.4537	6.32438
TCGA-5P-A9JY-01A	1.32502	4.56119
TCGA-BP-4960-01A	260.939	3.12689
TCGA-CJ-4895-01A	23.1979	7.30772
TCGA-KV-A74V-01A	19.9739	4.44446
TCGA-BP-4158-01A	36.0179	6.60658
TCGA-AK-3450-01A	117.323	5.76079
TCGA-B0-4841-01A	140.665	2.41098
TCGA-BP-4973-01A	124.205	6.58828
TCGA-A3-3367-01A	104.629	6.43518
TCGA-6D-AA2E-01A	91.8326	5.73868
TCGA-A4-7732-01A	1.04893	6.56199
TCGA-B2-4098-01A	18.5175	2.8097
TCGA-B4-5377-01A	47.9516	6.86813
TCGA-A4-7828-01A	39.0054	6.94716
TCGA-B1-A657-01A	14.9824	5.5801
TCGA-BQ-7059-01A	24.9449	3.09501
TCGA-AS-3777-01A	16.5098	4.52043
TCGA-BP-4338-01A	114.739	2.35531
TCGA-B8-4154-01A	30.9942	5.71683
TCGA-UZ-A9PS-01A	5.29175	5.19793
TCGA-CZ-5458-01A	29.1375	5.97966
TCGA-CJ-4900-01A	29.8977	5.47935
TCGA-BP-4963-01A	26.8769	6.25145
TCGA-CJ-4644-01A	31.077	5.48778
TCGA-A3-3349-01A	134.275	6.9247
TCGA-B0-4690-01A	36.1969	4.84715
TCGA-CW-5588-01A	83.3474	3.91518
TCGA-AK-3455-01A	28.9405	6.52069
TCGA-CW-5583-01A	46.9007	10.5428
TCGA-BQ-5893-01A	69.5271	5.37728
TCGA-B0-4844-01A	20.1761	1.7113
TCGA-MH-A562-01A	2.58573	4.39395
TCGA-B0-5088-01A	36.129	4.65966
TCGA-AL-3468-01A	4.54215	3.99278
TCGA-BP-4344-01A	91.7983	7.39479
TCGA-G7-A8LB-01A	1.44151	5.63905
TCGA-BQ-5886-01A	25.8777	2.29926
TCGA-BP-4994-01A	12.2222	6.57957
TCGA-CJ-5689-01A	39.8526	4.88836
TCGA-CJ-5686-01A	39.1072	4.92623
TCGA-BQ-5892-01A	27.0123	4.85141
TCGA-AK-3456-01A	6.63122	6.12806
TCGA-CJ-4893-01A	35.0064	5.82764
TCGA-BP-4803-01A	148.789	5.02076
TCGA-B0-5099-01A	42.2722	6.55592
TCGA-BP-4970-01A	40.6388	7.29521
TCGA-CJ-4634-01A	73.7712	8.40052
TCGA-3Z-A93Z-01A	125.994	5.29794
TCGA-B0-4701-01A	79.9518	6.0177
TCGA-G7-A8LE-01A	18.9473	7.70107
TCGA-MH-A55Z-01A	3.18188	5.43941
TCGA-CW-6093-01A	43.4426	8.40301
TCGA-B8-4153-01B	141.12	4.24198
TCGA-BP-4807-01A	29.0833	7.06463
TCGA-SX-A71R-01A	0.765969	4.78024
TCGA-2Z-A9J3-01A	3.82979	3.87311
TCGA-P4-AAVK-01A	27.5476	4.32888
TCGA-Y8-A898-01A	14.1752	4.32511
TCGA-GL-A59T-01A	10.317	3.16982
TCGA-BP-4798-01A	74.5102	5.28385
TCGA-CJ-4892-01A	43.052	6.25426
TCGA-AL-3471-01A	4.26189	4.85506
TCGA-AK-3454-01A	64.1961	2.60819
TCGA-B0-4823-01A	37.0918	6.14633
TCGA-Q2-A5QZ-01A	65.6558	2.22554
TCGA-CJ-4885-01A	45.8691	7.08746
TCGA-BP-4169-01A	53.7118	5.78339
TCGA-B0-5085-01A	105.486	3.86126
TCGA-B4-5838-01A	63.263	6.41514
TCGA-B0-5095-01A	85.7563	6.41174
TCGA-HE-7130-01A	262.305	3.77123
TCGA-B0-5081-01A	108.177	4.32391
TCGA-CJ-4899-01A	33.1089	8.25471
TCGA-G7-6792-01A	8.96321	5.32248
TCGA-CZ-5454-01A	115.938	6.36859
TCGA-A3-3326-01A	101.624	6.4146
TCGA-B9-A5W9-01A	12.8428	5.39517
TCGA-BQ-7050-01A	5.74317	5.53282
TCGA-UZ-A9PV-01A	0.974497	4.96912
TCGA-B0-5083-01A	21.8778	7.00305
TCGA-B0-4707-01A	82.534	3.72545
TCGA-BP-5169-01A	13.9338	1.60009
TCGA-Y8-A8S0-01A	12.9915	7.7121
TCGA-IA-A40Y-01A	69.4638	3.78291
TCGA-B1-A654-01A	25.7002	5.71285
TCGA-B8-4148-01A	25.8581	7.57703
TCGA-PJ-A5Z9-01A	10.1115	5.40213
TCGA-B0-4843-01A	96.21	3.7828
TCGA-CZ-5982-01A	77.9824	8.27479
TCGA-5P-A9KH-01A	9.14184	7.29917
TCGA-IZ-A6M9-01A	2.30118	6.33758
TCGA-J7-6720-01A	27.7479	5.87492
TCGA-B8-5553-01A	99.0282	5.44393
TCGA-B0-5706-01A	14.0628	4.97128
TCGA-BQ-7056-01A	81.6517	4.61672
TCGA-CZ-4858-01A	10.3747	4.43163
TCGA-CJ-5681-01A	26.6717	7.46198
TCGA-KV-A6GD-01A	52.609	4.19426
TCGA-B2-4101-01A	94.2942	6.54238
TCGA-BP-4343-01A	143.165	5.00604
TCGA-B8-4146-01B	156.95	13.3147
TCGA-A4-A5XZ-01A	11.6701	3.88987
TCGA-UZ-A9PO-01A	10.4223	3.96937
TCGA-CZ-5456-01A	115.401	3.00553
TCGA-A3-3382-01A	52.1663	7.51519
TCGA-BQ-7060-01A	14.2793	4.13572
TCGA-BP-4989-01A	35.136	5.41116
TCGA-P4-A5ED-01A	14.4995	4.64468
TCGA-B2-5635-01B	88.8779	15.0699
TCGA-BP-5198-01A	90.452	3.62971
TCGA-BP-4331-01A	63.6327	6.29757
TCGA-CJ-6027-01A	61.0126	3.67715
TCGA-CJ-4903-01A	28.1725	5.12523
TCGA-BP-4787-01A	85.4761	3.6356
TCGA-B0-4839-01A	29.4661	3.44734
TCGA-A3-A8OV-01A	90.9019	5.99783
TCGA-GL-A59R-01A	7.35037	5.91706
TCGA-KV-A6GE-01A	11.2169	4.34058
TCGA-BP-4160-01A	91.2016	5.45871
TCGA-BP-5175-01A	105.442	1.56801
TCGA-B0-4819-01A	59.8684	4.21262
TCGA-DV-A4W0-01A	68.1222	7.35667
TCGA-SX-A7SO-01A	6.29834	3.02586
TCGA-BP-4340-01A	31.897	6.80304
TCGA-DZ-6134-01A	19.3106	5.00431
TCGA-A3-3358-01A	89.8235	5.73112
TCGA-BP-4760-01A	30.8824	7.41242
TCGA-IA-A40U-01A	20.0896	4.33709
TCGA-B9-4115-01A	4.30587	6.6128
TCGA-DV-A4VX-01A	177.441	2.56555
TCGA-BP-4782-01A	114.32	5.32468
TCGA-5P-A9KC-01A	18.3189	3.7166
TCGA-CW-6097-01A	45.4828	5.45359
TCGA-A4-A48D-01A	4.281	2.47253
TCGA-CJ-4902-01A	100.673	5.45306
TCGA-B8-A54D-01A	23.5388	5.8564
TCGA-BP-4775-01A	42.8023	7.01045
TCGA-BP-4959-01A	111.94	5.32943
TCGA-F9-A4JJ-01A	76.2964	3.55661
TCGA-A4-A772-01A	14.1659	5.24026
TCGA-MH-A856-01A	17.6286	4.80687
TCGA-P4-AAVO-01A	10.0212	3.57613
TCGA-BQ-5889-01A	122.216	4.30248
TCGA-B0-5108-01A	81.1545	6.25317
TCGA-CJ-5676-01A	124.165	2.90421
TCGA-B0-5109-01A	35.3171	3.92435
TCGA-GK-A6C7-01A	63.6977	6.55104
TCGA-B8-4621-01A	15.5945	2.69131
TCGA-CZ-4861-01A	31.4045	5.48276
TCGA-B0-4817-01A	135.092	3.24267
TCGA-A4-8310-01A	7.56625	2.06055
TCGA-CJ-4871-01A	91.2711	5.04647
TCGA-DV-5576-01A	28.1401	7.67101
TCGA-CJ-5678-01A	16.4206	5.69172
TCGA-B0-4849-01A	48.4427	7.15535
TCGA-A3-3363-01A	6.92588	9.49416
TCGA-A3-A8OU-01A	97.8592	4.46366
TCGA-BP-4801-01A	51.8139	5.40173
TCGA-B0-4815-01A	111.853	4.32099
TCGA-A4-7286-01A	13.2564	2.37963
TCGA-B0-5117-01A	14.2036	3.92195
TCGA-CJ-4640-01A	53.9832	6.30676
TCGA-DV-5566-01A	50.5071	5.35885
TCGA-G6-A8L7-01A	98.7022	2.38852
TCGA-B9-4116-01A	5.16819	4.09462
TCGA-2Z-A9JO-01A	36.866	3.42661
TCGA-CJ-4888-01A	21.1337	4.4225
TCGA-B0-5703-01A	27.1002	6.18758
TCGA-CZ-5989-01A	61.745	13.6455
TCGA-MH-A854-01A	15.4788	3.90995
TCGA-CZ-5468-01A	118.948	2.7943
TCGA-BQ-5878-01A	46.539	7.8317
TCGA-BQ-5890-01A	34.1108	4.52803
TCGA-BP-4177-01A	20.6102	10.169
TCGA-Y8-A8RY-01A	16.4598	5.7041
TCGA-CJ-6031-01A	21.9179	4.70782
TCGA-EU-5905-01A	55.1711	4.11944
TCGA-B8-5549-01A	26.9634	5.12705
TCGA-5P-A9K3-01A	11.6793	2.06205
TCGA-A3-3331-01A	70.355	7.04738
TCGA-CJ-4889-01A	42.7285	6.60499
TCGA-BP-4166-01A	57.7325	4.9363
TCGA-B0-4710-01A	56.8117	7.61366
TCGA-A3-3362-01A	48.6485	6.50205
TCGA-B0-5698-01A	43.4206	6.26613
TCGA-BP-4969-01A	65.659	4.18541
TCGA-B9-A8YI-01A	18.5323	3.18066
TCGA-CJ-4894-01A	56.5137	8.29826
TCGA-CZ-5459-01A	112.179	3.70982
TCGA-B1-A656-01A	56.7276	2.22698
TCGA-CW-5580-01A	36.5576	6.66572
TCGA-B9-5156-01A	13.4322	6.13382
TCGA-BP-4164-01A	35.2693	6.7667
TCGA-A3-3376-01A	50.0721	8.04381
TCGA-B0-4713-01A	192.214	4.54426
TCGA-EU-5907-01A	13.6935	6.36226
TCGA-A4-7583-01A	4.30315	6.59904
TCGA-A4-A5Y0-01A	60.6656	3.52938
TCGA-B0-5701-01A	92.6578	4.70331
TCGA-BP-5180-01A	104.142	3.48109
TCGA-B0-4837-01A	51.2582	4.5684
TCGA-B0-5116-01A	151.047	4.83128
TCGA-MH-A561-01A	7.87546	6.34975
TCGA-BP-4756-01A	7.56272	3.2867
TCGA-AK-3429-01A	29.0844	4.27709
TCGA-A3-A6NL-01A	62.8633	5.54695
TCGA-CW-5581-01A	44.6789	5.1397
TCGA-B0-5710-01A	106.654	6.92276
TCGA-5P-A9JW-01A	16.6382	1.74212
TCGA-B0-5692-01A	28.7777	4.78624
TCGA-Y8-A897-01A	14.0782	5.1271
TCGA-F9-A7VF-01A	4.64604	3.75304
TCGA-G6-A8L6-01A	126.062	5.07022
TCGA-B0-4847-01A	13.3395	3.25705
TCGA-BQ-5887-01A	45.9814	2.04385
TCGA-BP-5189-01A	118.585	5.03679
TCGA-CW-6090-01A	59.6466	6.57515
TCGA-A3-3373-01A	49.9062	7.42861
TCGA-BP-4991-01A	41.3728	8.84794
TCGA-BQ-5876-01A	15.6122	6.5333
TCGA-HE-7129-01A	1.93101	5.88433
TCGA-A3-3316-01A	130.85	6.15178
TCGA-BP-5001-01A	45.6918	4.29181
TCGA-B0-4706-01A	122.11	6.02612
TCGA-B0-4693-01A	29.8961	7.28511
TCGA-BP-4351-01A	50.7623	6.15534
TCGA-CJ-4870-01A	101.88	5.5856
TCGA-DV-5573-01A	26.3671	6.49664
TCGA-BQ-7053-01A	16.8506	5.1431
TCGA-BP-4972-01A	133.459	7.69819
TCGA-HE-7128-01A	10.2511	4.74036
TCGA-BP-5184-01A	104.917	6.88828
TCGA-5P-A9K8-01A	17.7936	5.32947
TCGA-BP-4165-01A	115.889	4.30899
